# Supplementary material for: Genes and pathways associated with drought tolerance in Populus wutunensis under drought stress
Source: Research Square preprint supplement (doi:10.21203/rs.3.rs-2297519/v1), 2023-03-17
Supplement: Supplementary file 1 [file 6c1876171a1cf0c41a983c37.xlsx]

## Sheet: T2_vs_T1.gene_DE.signi
Gene id	MeanTPM (T2)	MeanTPM (T1)	log2FoldChange	pValue	qValue	result	CDD	KOG	NR	NT	PFAM	Swissprot	TrEMBL	GO	KEGG
TRINITY_DN55650_c1_g1	28.1146	5.28342	2.41178	5.72e-05	0.00299486	up	-	-	gi|566214832|ref|XP_002324210.2| hypothetical protein POPTR_0018s08240g [Populus trichocarpa] 1.1e-32	gi|743917647|ref|XM_011004514.1| PREDICTED: Populus euphratica uncharacterized LOC105109727 (LOC105109727), mRNA 4.81052e-163	-	-	tr|A9PK50|A9PK50_9ROSI Putative uncharacterized protein OS=Populus trichocarpa x Populus deltoides PE=2 SV=1 3.0e-29	-	-
TRINITY_DN57115_c1_g1	6.19312	16.6429	-1.42616	0.000700542	0.01897	down	pfam05703, Auxin_canalis, Auxin canalization. This domain is frequently found at the N-terminus of proteins containing pfam08458 at the C-terminus. It is a component of the auto-regulatory loop which enables auxin canalization by recruitment of the PIN1 auxin efflux protein to the cell membrane. 2.81244e-10	-	gi|1009173659|ref|XP_015867929.1| PREDICTED: VAN3-binding protein [Ziziphus jujuba] 1.5e-58	gi|743864354|ref|XM_011033596.1| PREDICTED: Populus euphratica uncharacterized LOC105130880 (LOC105130880), transcript variant X1, mRNA 0.0	pfam05703, Auxin_canalis, Auxin canalization. This domain is frequently found at the N-terminus of proteins containing pfam08458 at the C-terminus. It is a component of the auto-regulatory loop which enables auxin canalization by recruitment of the PIN1 auxin efflux protein to the cell membrane. 6.71916e-11	-	tr|B9GYC4|B9GYC4_POPTR Predicted protein OS=Populus trichocarpa GN=POPTRDRAFT_854211 PE=4 SV=1 2.6e-41	-	-
TRINITY_DN39409_c0_g1	1.59539	6.97133	-2.12753	0.00212077	0.0398718	down	-	-	-	gi|743786327|ref|XM_011029126.1| PREDICTED: Populus euphratica CBL-interacting serine/threonine-protein kinase 4 (LOC105127731), mRNA 0.0	-	-	-	-	-
TRINITY_DN44666_c0_g1	20.555	55.0964	-1.42247	0.000676749	0.0184777	down	pfam12046, DUF3529, Protein of unknown function (DUF3529). This family of proteins is functionally uncharacterized. This protein is found in bacteria and eukaryotes. Proteins in this family are typically between 176 to 190 amino acids in length. 3.41828e-17	-	gi|566155275|ref|XP_002299034.2| hypothetical protein POPTR_0001s46750g [Populus trichocarpa] 2.2e-116	gi|566155274|ref|XM_002298998.2| Populus trichocarpa hypothetical protein (POPTR_0001s46750g) mRNA, complete cds 0.0	pfam12046, DUF3529, Protein of unknown function (DUF3529). This family of proteins is functionally uncharacterized. This protein is found in bacteria and eukaryotes. Proteins in this family are typically between 176 to 190 amino acids in length. 8.16657e-18	sp|Q9LSE4|CCB1_ARATH Protein COFACTOR ASSEMBLY OF COMPLEX C SUBUNIT B CCB1, chloroplastic OS=Arabidopsis thaliana GN=CCB1 PE=1 SV=1 1.64007e-97	tr|B9GGJ5|B9GGJ5_POPTR Predicted protein OS=Populus trichocarpa GN=POPTRDRAFT_845383 PE=4 SV=1 2.5e-98	GO:0009507, chloroplast;GO:0009535, chloroplast thylakoid membrane;GO:0010190, cytochrome b6f complex assembly;GO:0016021, integral component of membrane	-
TRINITY_DN57526_c1_g3	8.4867	2.65468	1.67667	0.00232732	0.0425649	up	pfam00139, Lectin_legB, Legume lectin domain. 4.35158e-08	-	gi|566255914|ref|XP_006387976.1| hypothetical protein POPTR_0437s00200g [Populus trichocarpa] 2.6e-34	gi|164607231|gb|AC216544.1| Populus trichocarpa clone POP016-D10, complete sequence 0.0	pfam00139, Lectin_legB, Legume lectin domain. 1.03963e-08	sp|O81291|LRK44_ARATH L-type lectin-domain containing receptor kinase IV.4 OS=Arabidopsis thaliana GN=LECRK44 PE=3 SV=1 1.25729e-10	tr|B9IGF9|B9IGF9_POPTR Predicted protein OS=Populus trichocarpa GN=POPTRDRAFT_577038 PE=3 SV=1 5.4e-34	GO:0002229, defense response to oomycetes;GO:0004674, protein serine/threonine kinase activity;GO:0005524, ATP binding;GO:0005886, plasma membrane;GO:0016021, integral component of membrane;GO:0030246, carbohydrate binding;GO:0042742, defense response to bacterium	-
TRINITY_DN56563_c2_g3	0.88166	7.2267	-3.03504	3.9e-06	0.000365723	down	-	-	gi|566212966|ref|XP_002323888.2| hypothetical protein POPTR_0017s12620g [Populus trichocarpa] 6.4e-43	gi|566166257|ref|XM_006384253.1| Populus trichocarpa hypothetical protein (POPTR_0004s12370g) mRNA, complete cds 6.918e-110	-	sp|Q84J46|PP262_ARATH Pentatricopeptide repeat-containing protein At3g29290 OS=Arabidopsis thaliana GN=EMB2076 PE=2 SV=1 4.04622e-28	tr|B9IK44|B9IK44_POPTR Predicted protein OS=Populus trichocarpa GN=POPTRDRAFT_908996 PE=4 SV=1 2.7e-43	GO:0016021, integral component of membrane	-
TRINITY_DN52514_c0_g1	107.481	34.8406	1.62524	2.84e-06	0.000284466	up	PLN00142, PLN00142, sucrose synthase. 0.0	KOG0853, KOG0853, KOG0853, Glycosyltransferase [Cell wall/membrane/envelope biogenesis]. 1.16317e-85	gi|1018446003|gb|AMY60408.1| sucrose synthase [Populus tomentosa] 0.0e+00	gi|566159083|ref|XM_006386669.1| Populus trichocarpa hypothetical protein (POPTR_0002s20340g) mRNA, complete cds 0.0	pfam00862, Sucrose_synth, Sucrose synthase. Sucrose synthases catalyze the synthesis of sucrose from UDP-glucose and fructose. This family includes the bulk of the sucrose synthase protein. However the carboxyl terminal region of the sucrose synthases belongs to the glycosyl transferase family pfam00534. 0.0	sp|O24301|SUS2_PEA Sucrose synthase 2 OS=Pisum sativum GN=SUS2 PE=2 SV=1 0.0	tr|L0AUW9|L0AUW9_POPTO Sucrose synthase OS=Populus tomentosa PE=3 SV=1 0.0e+00	GO:0005985, sucrose metabolic process;GO:0016157, sucrose synthase activity	K00695-ko00500 Starch and sucrose metabolism
TRINITY_DN41714_c0_g1	13.21	1.80805	2.86913	1.23e-08	3.18e-06	up	pfam03018, Dirigent, Dirigent-like protein. This family contains a number of proteins which are induced during disease response in plants. Members of this family are involved in lignification. 1.37485e-59	-	gi|566163924|ref|XP_006386058.1| hypothetical protein POPTR_0003s21450g [Populus trichocarpa] 1.8e-105	gi|566163923|ref|XM_006385996.1| Populus trichocarpa hypothetical protein (POPTR_0003s21450g) mRNA, complete cds 0.0	pfam03018, Dirigent, Dirigent-like protein. This family contains a number of proteins which are induced during disease response in plants. Members of this family are involved in lignification. 3.28464e-60	sp|Q9C523|DIR19_ARATH Dirigent protein 19 OS=Arabidopsis thaliana GN=DIR19 PE=2 SV=1 2.64557e-73	tr|B9NKL8|B9NKL8_POPTR Predicted protein OS=Populus trichocarpa GN=POPTRDRAFT_792358 PE=2 SV=1 1.2e-100	GO:0009699, phenylpropanoid biosynthetic process;GO:0042349, guiding stereospecific synthesis activity;GO:0048046, apoplast	-
TRINITY_DN51915_c0_g2	0.526178	6.79197	-3.69021	7.29e-06	0.000595542	down	pfam02714, RSN1_7TM, Calcium-dependent channel, 7TM region, putative phosphate. RSN1_7TM is the seven transmembrane domain region of putative phosphate transporter. 1.05192e-11	KOG1134, KOG1134, KOG1134, Uncharacterized conserved protein [General function prediction only]. 5.60922e-26	gi|743907120|ref|XP_011046982.1| PREDICTED: calcium permeable stress-gated cation channel 1-like isoform X2 [Populus euphratica] 9.1e-46	gi|158631300|gb|AC213151.1| Populus trichocarpa clone POP014-H20, complete sequence 0.0	pfam02714, RSN1_7TM, Calcium-dependent channel, 7TM region, putative phosphate. RSN1_7TM is the seven transmembrane domain region of putative phosphate transporter. 2.51314e-12	sp|Q9XEA1|CSCL5_ARATH Protein OSCA1 OS=Arabidopsis thaliana GN=OSCA1 PE=1 SV=1 1.08323e-46	tr|B9N8E6|B9N8E6_POPTR Predicted protein OS=Populus trichocarpa GN=POPTRDRAFT_584709 PE=4 SV=1 8.5e-46	GO:0005227, calcium activated cation channel activity;GO:0005261, cation channel activity;GO:0005886, plasma membrane;GO:0006970, response to osmotic stress;GO:0016021, integral component of membrane;GO:0051262, protein tetramerization;GO:0071474, cellular hyperosmotic response;GO:0090279, regulation of calcium ion import	-
TRINITY_DN48422_c0_g4	20.4009	10.1791	1.00303	0.000771309	0.0203709	up	PLN02424, PLN02424, ketopantoate hydroxymethyltransferase. 6.32176e-113	KOG2949, KOG2949, KOG2949, Ketopantoate hydroxymethyltransferase [Coenzyme transport and metabolism]. 5.45653e-95	gi|224130402|ref|XP_002320828.1| ketopantoate hydroxymethyltransferase family protein [Populus trichocarpa] 4.2e-107	gi|566203271|ref|XM_002320792.2| Populus trichocarpa ketopantoate hydroxymethyltransferase family protein (POPTR_0014s08620g) mRNA, complete cds 0.0	pfam02548, Pantoate_transf, Ketopantoate hydroxymethyltransferase. Ketopantoate hydroxymethyltransferase (EC:2.1.2.11) is the first enzyme in the pantothenate biosynthesis pathway. 3.71394e-53	sp|Q9M315|PANB2_ARATH 3-methyl-2-oxobutanoate hydroxymethyltransferase 2, mitochondrial OS=Arabidopsis thaliana GN=KPHMT2 PE=1 SV=1 2.53969e-117	tr|B9I8Q3|B9I8Q3_POPTR Ketopantoate hydroxymethyltransferase OS=Populus trichocarpa GN=POPTRDRAFT_572313 PE=3 SV=1 1.7e-107	GO:0003864, 3-methyl-2-oxobutanoate hydroxymethyltransferase activity;GO:0005739, mitochondrion;GO:0008168, methyltransferase activity;GO:0008270, zinc ion binding;GO:0015940, pantothenate biosynthetic process;GO:0050897, cobalt ion binding	K00606-ko00770 Pantothenate and CoA biosynthesis
TRINITY_DN54913_c0_g1	13.0204	4.1562	1.64743	0.000780201	0.0205298	up	cd14664, STK_BAK1_like, Catalytic domain of the Serine/Threonine Kinase, BRI1 associated kinase 1 and related STKs. STKs catalyze the transfer of the gamma-phosphoryl group from ATP to serine/threonine residues on protein substrates. This subfamily includes three leucine-rich repeat receptor-like kinases (LRR-RLKs): Arabidopsis thaliana BAK1 and CLAVATA1 (CLV1), and Physcomitrella patens CLL1B cl…	KOG1187, KOG1187, KOG1187, Serine/threonine protein kinase [Signal transduction mechanisms]. 5.36588e-30	gi|224100757|ref|XP_002312001.1| kinase family protein [Populus trichocarpa] 5.1e-79	gi|566182201|ref|XM_002311965.2| Populus trichocarpa kinase family protein (POPTR_0008s03660g) mRNA, complete cds 0.0	pfam07714, Pkinase_Tyr, Protein tyrosine kinase. 3.52676e-07	sp|Q9SRH7|Y3130_ARATH Receptor-like serine/threonine-protein kinase At3g01300 OS=Arabidopsis thaliana GN=At3g01300 PE=2 SV=1 1.44885e-40	tr|B9HLI5|B9HLI5_POPTR Predicted protein OS=Populus trichocarpa GN=POPTRDRAFT_765264 PE=4 SV=1 2.1e-79	GO:0004672, protein kinase activity;GO:0004674, protein serine/threonine kinase activity;GO:0005524, ATP binding;GO:0005886, plasma membrane;GO:0016021, integral component of membrane	-
TRINITY_DN56428_c0_g3	4.22817	13.2831	-1.65148	0.000324281	0.0110534	down	-	-	gi|743843737|ref|XP_011027030.1| PREDICTED: ethylene-responsive transcription factor RAP2-7 isoform X4 [Populus euphratica] 2.6e-85	gi|743843736|ref|XM_011028728.1| PREDICTED: Populus euphratica floral homeotic protein APETALA 2 (LOC105127435), transcript variant X4, mRNA 0.0	-	sp|Q9SK03|RAP27_ARATH Ethylene-responsive transcription factor RAP2-7 OS=Arabidopsis thaliana GN=RAP2-7 PE=2 SV=2 2.71563e-44	tr|B9HU09|B9HU09_POPTR AP2 domain-containing transcription factor OS=Populus trichocarpa GN=RAP4 PE=4 SV=1 4.2e-85	GO:0003677, DNA binding;GO:0003700, transcription factor activity, sequence-specific DNA binding;GO:0005634, nucleus;GO:0006351, transcription, DNA-templated;GO:0007275, multicellular organism development;GO:0009873, ethylene-activated signaling pathway	-
TRINITY_DN57831_c2_g2	45.3246	237.333	-2.38855	3.9e-09	1.13e-06	down	PLN00113, PLN00113, leucine-rich repeat receptor-like protein kinase; Provisional. 4.8472e-30	KOG0532, KOG0532, KOG0532, Leucine-rich repeat (LRR) protein, contains calponin homology domain [Cytoskeleton]. 7.12293e-09	gi|566214455|ref|XP_006371912.1| hypothetical protein POPTR_0018s06150g [Populus trichocarpa] 3.7e-228	gi|743900291|ref|XM_011045141.1| PREDICTED: Populus euphratica leucine-rich repeat extensin-like protein 4 (LOC105138904), mRNA 0.0	-	sp|Q9LHF1|LRX4_ARATH Leucine-rich repeat extensin-like protein 4 OS=Arabidopsis thaliana GN=LRX4 PE=2 SV=1 0.0	tr|B9ILJ5|B9ILJ5_POPTR Predicted protein OS=Populus trichocarpa GN=POPTRDRAFT_1106492 PE=4 SV=1 1.6e-228	GO:0005199, structural constituent of cell wall;GO:0005576, extracellular region;GO:0005618, cell wall;GO:0009505, plant-type cell wall;GO:0009506, plasmodesma;GO:0071555, cell wall organization	-
TRINITY_DN46158_c0_g1	7.90207	30.4315	-1.94526	0.00152678	0.0325012	down	PLN02498, PLN02498, omega-3 fatty acid desaturase. 6.43155e-28	-	gi|743781591|ref|XP_011048066.1| PREDICTED: omega-3 fatty acid desaturase, chloroplastic [Populus euphratica] 1.5e-25	gi|566182745|ref|XM_002312127.2| Populus trichocarpa chloroplast omega-3 desaturase family protein (POPTR_0008s06960g) mRNA, complete cds 0.0	-	sp|P48620|FAD3C_SESIN Omega-3 fatty acid desaturase, chloroplastic OS=Sesamum indicum GN=FAD7 PE=2 SV=1 1.78079e-24	tr|B9HHQ8|B9HHQ8_POPTR Predicted protein OS=Populus trichocarpa GN=POPTRDRAFT_820418 PE=4 SV=1 6.1e-26	GO:0006629, lipid metabolic process;GO:0006636, unsaturated fatty acid biosynthetic process;GO:0016021, integral component of membrane;GO:0016717, oxidoreductase activity, acting on paired donors, with oxidation of a pair of donors resulting in the reduction of molecular oxygen to two molecules of water;GO:0031969, chloroplast membrane	-
TRINITY_DN50631_c0_g3	4.80945	12.5927	-1.38864	0.00271874	0.0476356	down	pfam01985, CRS1_YhbY, CRS1 / YhbY (CRM) domain. Escherichia coli YhbY is associated with pre-50S ribosomal subunits, which implies a function in ribosome assembly. GFP fused to a single-domain CRM protein from maize localizes to the nucleolus, suggesting that an analogous activity may have been retained in plants. A CRM domain containing protein in plant chloroplasts has been shown to function in…	KOG1990, KOG1990, KOG1990, Poly(A)-specific exoribonuclease PARN [Replication, recombination and repair]. 2.50822e-54	gi|224111046|ref|XP_002315729.1| hypothetical protein POPTR_0010s08770g [Populus trichocarpa] 0.0e+00	gi|743858887|ref|XM_011032273.1| PREDICTED: Populus euphratica chloroplastic group IIA intron splicing facilitator CRS1, chloroplastic (LOC105129976), transcript variant X2, mRNA 0.0	pfam01985, CRS1_YhbY, CRS1 / YhbY (CRM) domain. Escherichia coli YhbY is associated with pre-50S ribosomal subunits, which implies a function in ribosome assembly. GFP fused to a single-domain CRM protein from maize localizes to the nucleolus, suggesting that an analogous activity may have been retained in plants. A CRM domain containing protein in plant chloroplasts has been shown to function in…	sp|F4J2U9|CFM3A_ARATH CRM-domain containing factor CFM3A, chloroplastic/mitochondrial OS=Arabidopsis thaliana GN=CFM3A PE=2 SV=1 0.0	tr|B9HUM7|B9HUM7_POPTR Predicted protein OS=Populus trichocarpa GN=POPTRDRAFT_1090119 PE=4 SV=1 0.0e+00	GO:0000373, Group II intron splicing;GO:0003723, RNA binding;GO:0005739, mitochondrion;GO:0006397, mRNA processing;GO:0009507, chloroplast;GO:0030529, intracellular ribonucleoprotein complex;GO:0048316, seed development	-
TRINITY_DN57113_c0_g2	1.83445	7.77917	-2.08427	0.000439138	0.0136943	down	cd01364, KISc_BimC_Eg5, Kinesin motor domain, BimC/Eg5 spindle pole proteins. Kinesin motor domain, BimC/Eg5 spindle pole proteins, participate in spindle assembly and chromosome segregation during cell division. This catalytic (head) domain has ATPase activity and belongs to the larger group of P-loop NTPases. Kinesins are microtubule-dependent molecular motors that play important roles in intra…	KOG0243, KOG0243, KOG0243, Kinesin-like protein [Cytoskeleton]. 3.49392e-111	gi|566150680|ref|XP_006369500.1| hypothetical protein POPTR_0001s24020g [Populus trichocarpa] 2.2e-255	gi|566150679|ref|XM_006369438.1| Populus trichocarpa hypothetical protein (POPTR_0001s24020g) mRNA, complete cds 0.0	pfam00225, Kinesin, Kinesin motor domain. 6.7398e-18	sp|Q9LZU5|KN5D_ARATH Kinesin-like protein KIN-5D OS=Arabidopsis thaliana GN=KIN5D PE=2 SV=1 0.0	tr|B9GEU0|B9GEU0_POPTR Predicted protein OS=Populus trichocarpa GN=POPTRDRAFT_752212 PE=3 SV=1 3.7e-252	GO:0005524, ATP binding;GO:0005737, cytoplasm;GO:0005819, spindle;GO:0005871, kinesin complex;GO:0005874, microtubule;GO:0005886, plasma membrane;GO:0007018, microtubule-based movement;GO:0008574, ATP-dependent microtubule motor activity, plus-end-directed	-
TRINITY_DN55632_c2_g2	8.22411	1.0852	2.9219	6.02e-06	0.000517253	up	pfam03140, DUF247, Plant protein of unknown function. The function of the plant proteins constituting this family is unknown. 8.95731e-32	-	gi|566196318|ref|XP_002318393.2| hypothetical protein POPTR_0012s01880g [Populus trichocarpa] 7.6e-128	gi|566196317|ref|XM_002318357.2| Populus trichocarpa hypothetical protein (POPTR_0012s01880g) mRNA, complete cds 0.0	pfam03140, DUF247, Plant protein of unknown function. The function of the plant proteins constituting this family is unknown. 2.13998e-32	sp|Q9SD53|Y3720_ARATH UPF0481 protein At3g47200 OS=Arabidopsis thaliana GN=At3g47200 PE=2 SV=1 8.10278e-11	tr|B9I583|B9I583_POPTR Predicted protein OS=Populus trichocarpa GN=POPTRDRAFT_772387 PE=4 SV=1 3.2e-128	GO:0005886, plasma membrane;GO:0016021, integral component of membrane	-
TRINITY_DN54412_c0_g3	20.441	75.7381	-1.88956	0.00127052	0.0289328	down	PLN02249, PLN02249, indole-3-acetic acid-amido synthetase. 0.0	-	gi|566187161|ref|XP_002313887.2| hypothetical protein POPTR_0009s09590g [Populus trichocarpa] 0.0e+00	gi|566187160|ref|XM_002313851.2| Populus trichocarpa hypothetical protein (POPTR_0009s09590g) mRNA, complete cds 0.0	pfam03321, GH3, GH3 auxin-responsive promoter. 0.0	sp|O82333|GH31_ARATH Probable indole-3-acetic acid-amido synthetase GH3.1 OS=Arabidopsis thaliana GN=GH3.1 PE=2 SV=1 0.0	tr|B9HS86|B9HS86_POPTR GH3 family protein OS=Populus trichocarpa GN=GH3-2 PE=4 SV=1 0.0e+00	GO:0009733, response to auxin;GO:0016874, ligase activity	K14487-ko04075 Plant hormone signal transduction
TRINITY_DN43066_c0_g1	1.77961	7.75218	-2.12304	0.000249437	0.00904224	down	-	-	gi|566158323|ref|XP_002301364.2| hypothetical protein POPTR_0002s16230g [Populus trichocarpa] 3.9e-102	gi|566158322|ref|XM_002301328.2| Populus trichocarpa hypothetical protein (POPTR_0002s16230g) mRNA, complete cds 0.0	-	sp|Q6EVK6|BRM_ARATH ATP-dependent helicase BRM OS=Arabidopsis thaliana GN=BRM PE=1 SV=1 2.1903e-63	tr|B9GQA7|B9GQA7_POPTR Chromatin remodeling complex subunit OS=Populus trichocarpa GN=CHR958 PE=4 SV=1 1.7e-102	GO:0003677, DNA binding;GO:0003682, chromatin binding;GO:0004386, helicase activity;GO:0005524, ATP binding;GO:0005634, nucleus;GO:0005829, cytosol;GO:0006351, transcription, DNA-templated;GO:0006355, regulation of transcription, DNA-templated;GO:0008094, DNA-dependent ATPase activity;GO:0010199, organ boundary specification between lateral organs and the meristem;GO:0040029, regulation of gene e…	-
TRINITY_DN50132_c0_g2	1.28115	5.13096	-2.00179	0.00011861	0.00531721	down	PLN03218, PLN03218, maturation of RBCL 1; Provisional. 2.97222e-17	-	gi|743785436|ref|XP_011025175.1| PREDICTED: pentatricopeptide repeat-containing protein At5g13770, chloroplastic-like [Populus euphratica] 0.0e+00	gi|164663921|gb|AC216597.1| Populus trichocarpa clone POP032-B19, complete sequence 0.0	-	sp|Q66GP4|PP379_ARATH Pentatricopeptide repeat-containing protein At5g13770, chloroplastic OS=Arabidopsis thaliana GN=At5g13770 PE=2 SV=1 0.0	tr|B9HVN2|B9HVN2_POPTR Predicted protein (Fragment) OS=Populus trichocarpa GN=POPTRDRAFT_231523 PE=2 SV=1 2.2e-236	GO:0009507, chloroplast;GO:0009658, chloroplast organization	-
TRINITY_DN48376_c0_g3	10.9346	4.03916	1.43677	3.88e-05	0.00223136	up	-	-	gi|566176837|ref|XP_006381778.1| hypothetical protein POPTR_0006s17920g [Populus trichocarpa] 9.9e-133	gi|566176836|ref|XM_006381716.1| Populus trichocarpa hypothetical protein (POPTR_0006s17920g) mRNA, complete cds 0.0	-	-	tr|B9N326|B9N326_POPTR Predicted protein OS=Populus trichocarpa GN=POPTRDRAFT_827736 PE=4 SV=1 4.1e-133	-	-
TRINITY_DN49633_c1_g1	7.35204	37.1405	-2.33678	8.07e-05	0.00389486	down	-	-	gi|743937386|ref|XP_011013098.1| PREDICTED: TMV resistance protein N-like isoform X1 [Populus euphratica] 3.4e-82	gi|105923138|gb|DQ513245.1| Populus trichocarpa clone 235692 TIR-NBS type disease resistance protein mRNA, complete cds 0.0	-	-	tr|Q710T8|Q710T8_POPDE TIR/NBS/LRR protein OS=Populus deltoides GN=60I2G11 PE=4 SV=1 3.1e-82	GO:0006952, defense response;GO:0007165, signal transduction;GO:0043531, ADP binding	-
TRINITY_DN52498_c1_g1	17.3018	8.31959	1.05633	0.00214191	0.0401135	up	pfam03031, NIF, NLI interacting factor-like phosphatase. This family contains a number of NLI interacting factor isoforms and also an N-terminal regions of RNA polymerase II CTC phosphatase and FCP1 serine phosphatase. This region has been identified as the minimal phosphatase domain. 9.14725e-08	KOG1605, KOG1605, KOG1605, TFIIF-interacting CTD phosphatase, including NLI-interacting factor (involved in RNA polymerase II regulation) [Transcription]. 1.90932e-17	gi|566152714|ref|XP_006369877.1| hypothetical protein POPTR_0001s34390g [Populus trichocarpa] 5.1e-22	gi|566152713|ref|XM_006369815.1| Populus trichocarpa hypothetical protein (POPTR_0001s34390g) mRNA, complete cds 0.0	pfam03031, NIF, NLI interacting factor-like phosphatase. This family contains a number of NLI interacting factor isoforms and also an N-terminal regions of RNA polymerase II CTC phosphatase and FCP1 serine phosphatase. This region has been identified as the minimal phosphatase domain. 2.18536e-08	sp|Q54GB2|CTSL2_DICDI CTD small phosphatase-like protein 2 OS=Dictyostelium discoideum GN=ctdspl2 PE=3 SV=1 1.46184e-09	tr|B9N9C8|B9N9C8_POPTR Predicted protein OS=Populus trichocarpa GN=POPTRDRAFT_586980 PE=4 SV=1 2.1e-22	GO:0004721, phosphoprotein phosphatase activity	-
TRINITY_DN46702_c0_g1	54.6489	168.871	-1.62766	0.00173174	0.0350541	down	cd06606, STKc_MAPKKK, Catalytic domain of the Serine/Threonine Kinase, Mitogen-Activated Protein Kinase Kinase Kinase. STKs catalyze the transfer of the gamma-phosphoryl group from ATP to serine/threonine residues on protein substrates. MAPKKKs (MKKKs or MAP3Ks) are also called MAP/ERK kinase kinases (MEKKs) in some cases. They phosphorylate and activate MAPK kinases (MAPKKs or MKKs or MAP2Ks), w…	KOG0198, KOG0198, KOG0198, MEKK and related serine/threonine protein kinases [Signal transduction mechanisms]. 2.01999e-67	gi|566171993|ref|XP_002306473.2| hypothetical protein POPTR_0005s18240g [Populus trichocarpa] 3.3e-189	gi|566171992|ref|XM_002306437.2| Populus trichocarpa hypothetical protein (POPTR_0005s18240g) mRNA, complete cds 0.0	pfam00069, Pkinase, Protein kinase domain. 7.77468e-38	sp|O22042|M3K3_ARATH Mitogen-activated protein kinase kinase kinase 3 OS=Arabidopsis thaliana GN=ANP3 PE=1 SV=1 7.37646e-49	tr|B9H6H0|B9H6H0_POPTR Predicted protein OS=Populus trichocarpa GN=POPTRDRAFT_558873 PE=4 SV=1 7.8e-201	GO:0004674, protein serine/threonine kinase activity;GO:0004702, signal transducer, downstream of receptor, with serine/threonine kinase activity;GO:0004709, MAP kinase kinase kinase activity;GO:0005524, ATP binding;GO:0005737, cytoplasm;GO:0005874, microtubule;GO:0043622, cortical microtubule organization;GO:0046777, protein autophosphorylation;GO:0048046, apoplast	-
TRINITY_DN45730_c0_g2	10.0517	4.42243	1.18453	0.00157555	0.0330559	up	PLN00113, PLN00113, leucine-rich repeat receptor-like protein kinase; Provisional. 6.20716e-55	KOG0444, KOG0444, KOG0444, Cytoskeletal regulator Flightless-I (contains leucine-rich and gelsolin repeats) [Cytoskeleton]. 2.67671e-12	gi|566240794|ref|XP_002325997.2| leucine-rich repeat family protein [Populus trichocarpa] 6.7e-217	gi|743915608|ref|XM_011003460.1| PREDICTED: Populus euphratica LRR receptor-like serine/threonine-protein kinase GSO1 (LOC105108943), mRNA 0.0	-	sp|O22938|PXC3_ARATH Leucine-rich repeat receptor-like tyrosine-protein kinase PXC3 OS=Arabidopsis thaliana GN=PXC3 PE=2 SV=1 9.26733e-61	tr|B9IQK1|B9IQK1_POPTR Predicted protein OS=Populus trichocarpa GN=POPTRDRAFT_574290 PE=4 SV=1 6.9e-224	GO:0004714, transmembrane receptor protein tyrosine kinase activity;GO:0005524, ATP binding;GO:0005886, plasma membrane;GO:0016021, integral component of membrane	-
TRINITY_DN45730_c0_g1	9.07071	4.01181	1.17696	0.00157574	0.0330559	up	PLN00113, PLN00113, leucine-rich repeat receptor-like protein kinase; Provisional. 6.26247e-08	-	gi|566240794|ref|XP_002325997.2| leucine-rich repeat family protein [Populus trichocarpa] 1.6e-80	gi|743915608|ref|XM_011003460.1| PREDICTED: Populus euphratica LRR receptor-like serine/threonine-protein kinase GSO1 (LOC105108943), mRNA 0.0	-	sp|Q9LRT1|Y3804_ARATH Probably inactive leucine-rich repeat receptor-like protein kinase At3g28040 OS=Arabidopsis thaliana GN=At3g28040 PE=2 SV=1 1.46462e-10	tr|B9IQK1|B9IQK1_POPTR Predicted protein OS=Populus trichocarpa GN=POPTRDRAFT_574290 PE=4 SV=1 4.4e-72	GO:0004672, protein kinase activity;GO:0005524, ATP binding;GO:0016021, integral component of membrane	-
TRINITY_DN51808_c0_g2	45.7585	5.30297	3.10917	6.13e-16	1.31e-12	up	-	KOG1515, KOG1515, KOG1515, Arylacetamide deacetylase [Defense mechanisms]. 1.94697e-13	gi|566204057|ref|XP_002320380.2| hypothetical protein POPTR_0014s13170g [Populus trichocarpa] 7.2e-44	gi|256782829|gb|AC182665.2| Populus trichocarpa clone Pop1-18D20, complete sequence 0.0	-	sp|Q9LYC1|GID1B_ARATH Gibberellin receptor GID1B OS=Arabidopsis thaliana GN=GID1B PE=1 SV=1 2.02706e-37	tr|B9I9Z1|B9I9Z1_POPTR Predicted protein OS=Populus trichocarpa GN=POPTRDRAFT_731943 PE=4 SV=1 3.0e-44	GO:0005634, nucleus;GO:0008152, metabolic process;GO:0009739, response to gibberellin;GO:0009740, gibberellic acid mediated signaling pathway;GO:0009939, positive regulation of gibberellic acid mediated signaling pathway;GO:0010476, gibberellin mediated signaling pathway;GO:0016787, hydrolase activity;GO:0048444, floral organ morphogenesis	-
TRINITY_DN55786_c0_g4	33.5979	114.457	-1.76836	7.22e-05	0.00356485	down	PLN02703, PLN02703, beta-fructofuranosidase. 1.92246e-60	-	gi|566181947|ref|XP_002311958.2| hypothetical protein POPTR_0008s02460g [Populus trichocarpa] 3.7e-47	gi|566181946|ref|XM_002311922.2| Populus trichocarpa hypothetical protein (POPTR_0008s02460g) mRNA, complete cds 1.06563e-142	pfam12899, Glyco_hydro_100, Alkaline and neutral invertase. This is a family of bacterial and plant alkaline and neutral invertases, EC:3.2.1.26, previously known as Invertase_neut pfam04853. 8.97001e-37	sp|Q6H6N5|NIN3_ORYSJ Neutral/alkaline invertase 3, chloroplastic OS=Oryza sativa subsp. japonica GN=NIN3 PE=2 SV=1 7.86555e-61	tr|B9HL20|B9HL20_POPTR Predicted protein (Fragment) OS=Populus trichocarpa GN=POPTRDRAFT_420913 PE=4 SV=1 1.5e-47	GO:0004575, sucrose alpha-glucosidase activity;GO:0005975, carbohydrate metabolic process;GO:0009507, chloroplast;GO:0033926, glycopeptide alpha-N-acetylgalactosaminidase activity	-
TRINITY_DN57964_c3_g7	42.3825	16.3712	1.37231	0.00179192	0.0358652	up	-	-	gi|224086040|ref|XP_002307790.1| BTB/POZ domain-containing family protein [Populus trichocarpa] 5.9e-39	gi|566173503|ref|XM_002307754.2| Populus trichocarpa BTB/POZ domain-containing family protein (POPTR_0005s27270g) mRNA, complete cds 6.44783e-121	-	sp|Q8LEV3|Y2060_ARATH BTB/POZ domain-containing protein At2g30600 OS=Arabidopsis thaliana GN=At2g30600/At2g30610 PE=2 SV=1 9.52484e-24	tr|B9H5H7|B9H5H7_POPTR Predicted protein OS=Populus trichocarpa GN=POPTRDRAFT_818862 PE=4 SV=1 2.5e-39	GO:0016567, protein ubiquitination	-
TRINITY_DN56773_c1_g4	38.3397	10.5723	1.85854	9.41e-06	0.000728321	up	-	-	gi|224103605|ref|XP_002313119.1| hypothetical protein POPTR_0009s10400g [Populus trichocarpa] 7.9e-118	gi|566187306|ref|XM_002313083.2| Populus trichocarpa hypothetical protein (POPTR_0009s10400g) mRNA, complete cds 0.0	-	sp|Q9M7Q3|AI5L6_ARATH ABSCISIC ACID-INSENSITIVE 5-like protein 6 OS=Arabidopsis thaliana GN=ABF3 PE=1 SV=1 1.12855e-46	tr|B9HS14|B9HS14_POPTR Predicted protein OS=Populus trichocarpa GN=POPTRDRAFT_767577 PE=4 SV=1 3.3e-118	GO:0003700, transcription factor activity, sequence-specific DNA binding;GO:0005634, nucleus;GO:0006351, transcription, DNA-templated;GO:0009414, response to water deprivation;GO:0009651, response to salt stress;GO:0009737, response to abscisic acid;GO:0009738, abscisic acid-activated signaling pathway;GO:0043565, sequence-specific DNA binding	-
TRINITY_DN56773_c1_g1	30.4278	9.57088	1.66867	9.2e-06	0.000716265	up	cd14707, bZIP_plant_BZIP46, Basic leucine zipper (bZIP) domain of uncharaterized Plant BZIP transcription factors: a DNA-binding and dimerization domain. This subfamily is composed of uncharacterized plant bZIP transciption factors with similarity to Glycine max BZIP46, which may be a drought-responsive gene. Plant bZIPs are involved in developmental and physiological processes in response to sti…	-	gi|566166555|ref|XP_006384406.1| hypothetical protein POPTR_0004s14790g [Populus trichocarpa] 5.7e-205	gi|743923757|ref|XM_011007680.1| PREDICTED: Populus euphratica bZIP transcription factor TRAB1-like (LOC105112095), transcript variant X1, mRNA 0.0	-	sp|Q9M7Q3|AI5L6_ARATH ABSCISIC ACID-INSENSITIVE 5-like protein 6 OS=Arabidopsis thaliana GN=ABF3 PE=1 SV=1 1.36755e-98	tr|A3FM74|A3FM74_POPTR Abscisic acid responsive elements-binding protein 2 OS=Populus trichocarpa GN=ABF2-1 PE=2 SV=1 2.4e-205	GO:0003700, transcription factor activity, sequence-specific DNA binding;GO:0005634, nucleus;GO:0006351, transcription, DNA-templated;GO:0009414, response to water deprivation;GO:0009651, response to salt stress;GO:0009737, response to abscisic acid;GO:0009738, abscisic acid-activated signaling pathway;GO:0043565, sequence-specific DNA binding	K14432-ko04075 Plant hormone signal transduction
TRINITY_DN53666_c1_g2	121.867	27.5106	2.14724	1.36e-07	2.3e-05	up	-	-	gi|566211101|ref|XP_006372624.1| hypothetical protein POPTR_0017s03345g [Populus trichocarpa] 8.7e-24	gi|118486530|gb|EF147069.1| Populus trichocarpa clone WS01227_B01 3.84691e-114	-	-	tr|B9NC89|B9NC89_POPTR Predicted protein OS=Populus trichocarpa GN=POPTRDRAFT_789057 PE=4 SV=1 1.4e-07	-	-
TRINITY_DN45951_c0_g1	11.6164	5.04324	1.20374	0.000402253	0.0129192	up	cd00293, USP_Like, Usp: Universal stress protein family. The universal stress protein Usp is a small cytoplasmic bacterial protein whose expression is enhanced when the cell is exposed to stress agents. Usp enhances the rate of cell survival during prolonged exposure to such conditions, and may provide a general "stress endurance" activity. The crystal structure of Haemophilus influenzae Usp reve…	-	gi|743830383|ref|XP_011023763.1| PREDICTED: universal stress protein A-like protein [Populus euphratica] 4.5e-88	gi|566198749|ref|XM_002319450.2| Populus trichocarpa hypothetical protein (POPTR_0013s01110g) mRNA, complete cds 0.0	-	sp|Q8LGG8|USPAL_ARATH Universal stress protein A-like protein OS=Arabidopsis thaliana GN=At3g01520 PE=1 SV=2 1.05711e-11	tr|B9I704|B9I704_POPTR Predicted protein OS=Populus trichocarpa GN=POPTRDRAFT_662619 PE=4 SV=1 2.5e-88	GO:0005886, plasma membrane;GO:0006950, response to stress;GO:0016208, AMP binding	-
TRINITY_DN55837_c0_g2	27.7099	9.96345	1.47568	0.000102269	0.00470284	up	-	-	gi|118481079|gb|ABK92493.1| unknown [Populus trichocarpa] 6.2e-101	gi|118481078|gb|EF144229.1| Populus trichocarpa clone PX0011_H17 unknown mRNA 0.0	-	-	tr|A9P7Z0|A9P7Z0_POPTR Putative uncharacterized protein OS=Populus trichocarpa PE=2 SV=1 2.6e-101	GO:0016021, integral component of membrane	-
TRINITY_DN52942_c1_g3	9.01652	32.7952	-1.86284	4.79e-05	0.00260018	down	smart00380, AP2, DNA-binding domain in plant proteins such as APETALA2 and EREBPs. 6.88594e-09	-	gi|327343670|dbj|BAK09567.1| AP2/ERF domain-containing protein [Populus nigra] 3.1e-84	gi|566198384|ref|XM_002318811.2| Populus trichocarpa AP2 domain-containing family protein (POPTR_0012s13880g) mRNA, complete cds 0.0	-	sp|Q9FJ90|ERF25_ARATH Ethylene-responsive transcription factor ERF025 OS=Arabidopsis thaliana GN=ERF025 PE=2 SV=1 4.25644e-24	tr|F1SZW2|F1SZW2_POPNI AP2/ERF domain-containing protein OS=Populus nigra GN=PncERF1 PE=2 SV=1 1.3e-84	GO:0003677, DNA binding;GO:0003700, transcription factor activity, sequence-specific DNA binding;GO:0005634, nucleus;GO:0006351, transcription, DNA-templated;GO:0009873, ethylene-activated signaling pathway;GO:0044212, transcription regulatory region DNA binding;GO:0050832, defense response to fungus	-
TRINITY_DN52942_c1_g9	64.8041	302.793	-2.22418	2.9e-06	0.000290313	down	-	-	gi|527187516|gb|EPS59999.1| hypothetical protein M569_14806, partial [Genlisea aurea] 6.4e-12	gi|566194507|ref|XM_002316719.2| Populus trichocarpa VITAMIN C DEFECTIVE 2 family protein (POPTR_0011s08940g) mRNA, complete cds 0.0	-	-	-	-	-
TRINITY_DN56074_c0_g4	163.718	73.7213	1.15106	0.000326243	0.011085	up	pfam04873, EIN3, Ethylene insensitive 3. Ethylene insensitive 3 (EIN3) proteins are a family of plant DNA-binding proteins that regulate transcription in response to the gaseous plant hormone ethylene, and are essential for ethylene-mediated responses including the triple response, cell growth inhibition, and accelerated senescence. 3.3417e-32	-	gi|743868367|ref|XP_011032978.1| PREDICTED: ETHYLENE INSENSITIVE 3-like 1 protein [Populus euphratica] 1.4e-197	gi|743868366|ref|XM_011034676.1| PREDICTED: Populus euphratica ETHYLENE INSENSITIVE 3-like 1 protein (LOC105131627), mRNA 0.0	pfam04873, EIN3, Ethylene insensitive 3. Ethylene insensitive 3 (EIN3) proteins are a family of plant DNA-binding proteins that regulate transcription in response to the gaseous plant hormone ethylene, and are essential for ethylene-mediated responses including the triple response, cell growth inhibition, and accelerated senescence. 7.98359e-33	sp|Q9SLH0|EIL1_ARATH ETHYLENE INSENSITIVE 3-like 1 protein OS=Arabidopsis thaliana GN=EIL1 PE=1 SV=1 1.71875e-64	tr|B9HK87|B9HK87_POPTR Ethylene-insensitive 3d OS=Populus trichocarpa GN=EIN3D PE=4 SV=1 2.6e-150	GO:0003677, DNA binding;GO:0003700, transcription factor activity, sequence-specific DNA binding;GO:0005622, intracellular;GO:0005634, nucleus;GO:0006351, transcription, DNA-templated;GO:0006355, regulation of transcription, DNA-templated;GO:0009723, response to ethylene;GO:0009873, ethylene-activated signaling pathway;GO:0042742, defense response to bacterium;GO:0071281, cellular response to iro…	-
TRINITY_DN56528_c1_g4	47.1129	12.9019	1.86854	0.000516468	0.0153549	up	PLN02173, PLN02173, UDP-glucosyl transferase family protein. 3.79981e-39	KOG1192, KOG1192, KOG1192, UDP-glucuronosyl and UDP-glucosyl transferase [Carbohydrate transport and metabolism, Energy production and conversion]. 3.77273e-18	gi|743908362|ref|XP_011047630.1| PREDICTED: UDP-glycosyltransferase 74E2-like [Populus euphratica] 3.7e-53	gi|566178938|ref|XM_006380206.1| Populus trichocarpa hypothetical protein (POPTR_0007s00740g) mRNA, complete cds 3.21811e-153	pfam00201, UDPGT, UDP-glucoronosyl and UDP-glucosyl transferase. 5.08698e-11	sp|Q9SYK9|U74E2_ARATH UDP-glycosyltransferase 74E2 OS=Arabidopsis thaliana GN=UGT74E2 PE=1 SV=1 2.07014e-46	tr|B9P5A3|B9P5A3_POPTR Predicted protein OS=Populus trichocarpa GN=POPTRDRAFT_586997 PE=3 SV=1 1.8e-49	GO:0009813, flavonoid biosynthetic process;GO:0010016, shoot system morphogenesis;GO:0035251, UDP-glucosyltransferase activity;GO:0042631, cellular response to water deprivation;GO:0043231, intracellular membrane-bounded organelle;GO:0052638, indole-3-butyrate beta-glucosyltransferase activity;GO:0052696, flavonoid glucuronidation;GO:0070301, cellular response to hydrogen peroxide;GO:0071215, cel…	-
TRINITY_DN46497_c0_g1	16.7098	6.13601	1.44532	0.000366792	0.0120608	up	TIGR03151, enACPred_II, putative enoyl-[acyl-carrier-protein] reductase II. This oxidoreductase of the 2-nitropropane dioxygenase family (pfam03060) is commonly found in apparent operons with genes involved in fatty acid biosynthesis. Furthermore, this genomic context generally includes the fabG 3-oxoacyl-[ACP] reductase and lacks the fabI enoyl-[ACP] reductase. 2.65733e-38	KOG0538, KOG0538, KOG0538, Glycolate oxidase [Energy production and conversion]. 9.25329e-08	gi|224140777|ref|XP_002323755.1| hypothetical protein POPTR_0017s07870g [Populus trichocarpa] 1.0e-179	gi|566212074|ref|XM_002323719.2| Populus trichocarpa hypothetical protein (POPTR_0017s07870g) mRNA, complete cds 0.0	pfam03060, NMO, Nitronate monooxygenase. Nitronate monooxygenase (NMO), formerly referred to as 2-nitropropane dioxygenase (NPD) (EC:1.13.11.32), is an FMN-dependent enzyme that uses molecular oxygen to oxidize (anionic) alkyl nitronates and, in the case of the enzyme from Neurospora crassa, (neutral) nitroalkanes to the corresponding carbonyl compounds and nitrite. Previously classified as 2-nit…	sp|O05413|2NPD_BACSU Probable nitronate monooxygenase OS=Bacillus subtilis (strain 168) GN=yrpB PE=3 SV=1 2.18899e-22	tr|B9IJE3|B9IJE3_POPTR Predicted protein OS=Populus trichocarpa GN=POPTRDRAFT_577385 PE=4 SV=1 4.2e-180	GO:0005829, cytosol;GO:0018580, nitronate monooxygenase activity	-
TRINITY_DN43682_c0_g1	5.54594	18.6403	-1.74892	0.000222602	0.00837439	down	pfam14288, FKS1_dom1, 1,3-beta-glucan synthase subunit FKS1, domain-1. The FKS1_dom1 domain is likely to be the 'Class I' region just N-terminal to the first set of transmembrane helices that is involved in 1,3-beta-glucan synthesis itself. This family is found on proteins with family Glucan_synthase, pfam02364. 1.65116e-44	KOG0916, KOG0916, KOG0916, 1,3-beta-glucan synthase/callose synthase catalytic subunit [Cell wall/membrane/envelope biogenesis]. 8.74438e-92	gi|743916638|ref|XP_011002293.1| PREDICTED: callose synthase 2-like [Populus euphratica] 0.0e+00	gi|743916637|ref|XM_011003991.1| PREDICTED: Populus euphratica callose synthase 2-like (LOC105109325), transcript variant X1, mRNA 0.0	pfam14288, FKS1_dom1, 1,3-beta-glucan synthase subunit FKS1, domain-1. The FKS1_dom1 domain is likely to be the 'Class I' region just N-terminal to the first set of transmembrane helices that is involved in 1,3-beta-glucan synthesis itself. This family is found on proteins with family Glucan_synthase, pfam02364. 3.94476e-45	sp|Q9SL03|CALS2_ARATH Callose synthase 2 OS=Arabidopsis thaliana GN=CALS2 PE=2 SV=3 0.0	tr|B9N6I5|B9N6I5_POPTR Predicted protein OS=Populus trichocarpa GN=POPTRDRAFT_828302 PE=4 SV=1 0.0e+00	GO:0000148, 1,3-beta-D-glucan synthase complex;GO:0003843, 1,3-beta-D-glucan synthase activity;GO:0006075, (1->3)-beta-D-glucan biosynthetic process;GO:0008360, regulation of cell shape;GO:0016021, integral component of membrane;GO:0071555, cell wall organization	-
TRINITY_DN58039_c5_g4	6.44793	19.1018	-1.5668	0.000895648	0.0225158	down	pfam02259, FAT, FAT domain. The FAT domain is named after FRAP, ATM and TRRAP. 1.78289e-17	KOG0889, KOG0889, KOG0889, Histone acetyltransferase SAGA, TRRAP/TRA1 component, PI-3 kinase superfamily [Signal transduction mechanisms, Chromatin structure and dynamics, Replication, recombination and repair, Cell cycle control, cell division, chromosome partitioning]. 6.8648e-148	gi|566170835|ref|XP_002307350.2| FAT domain-containing family protein [Populus trichocarpa] 0.0e+00	gi|566170834|ref|XM_002307314.2| Populus trichocarpa FAT domain-containing family protein (POPTR_0005s11640g) mRNA, complete cds 0.0	pfam02259, FAT, FAT domain. The FAT domain is named after FRAP, ATM and TRRAP. 4.25947e-18	sp|Q9HFE8|TRA1_SCHPO Transcription-associated protein 1 OS=Schizosaccharomyces pombe (strain 972 / ATCC 24843) GN=tra1 PE=3 SV=1 4.92078e-102	tr|B9MXG3|B9MXG3_POPTR Predicted protein OS=Populus trichocarpa GN=POPTRDRAFT_827059 PE=4 SV=1 0.0e+00	GO:0000123, histone acetyltransferase complex;GO:0000124, SAGA complex;GO:0005634, nucleus;GO:0006281, DNA repair;GO:0006338, chromatin remodeling;GO:0006351, transcription, DNA-templated;GO:0006357, regulation of transcription from RNA polymerase II promoter;GO:0007165, signal transduction;GO:0016301, kinase activity;GO:0016573, histone acetylation;GO:0070209, ASTRA complex	-
TRINITY_DN55585_c2_g5	109.663	49.7151	1.14132	0.000206712	0.00790863	up	PLN00036, PLN00036, 40S ribosomal protein S4; Provisional. 1.32118e-12	KOG0378, KOG0378, KOG0378, 40S ribosomal protein S4 [Translation, ribosomal structure and biogenesis]. 6.49703e-11	gi|596014812|ref|XP_007218753.1| hypothetical protein PRUPE_ppa009337mg [Prunus persica] 8.4e-08	gi|566210059|ref|XM_002322985.2| Populus trichocarpa hypothetical protein (POPTR_0016s13210g) mRNA, complete cds 8.10116e-44	pfam08071, RS4NT, RS4NT (NUC023) domain. This is the N-terminal domain of Ribosomal S4 / S4e proteins. This domain is associated with S4 and KOW domains. 2.52097e-06	sp|P49398|RS4_ORYSJ 40S ribosomal protein S4 OS=Oryza sativa subsp. japonica GN=RPS4 PE=2 SV=3 9.96484e-12	tr|F6GXU1|F6GXU1_VITVI Putative uncharacterized protein OS=Vitis vinifera GN=VIT_08s0058g00390 PE=3 SV=1 5.4e-09	GO:0003735, structural constituent of ribosome;GO:0006412, translation;GO:0019843, rRNA binding;GO:0022627, cytosolic small ribosomal subunit	-
TRINITY_DN54752_c0_g3	11.2629	30.3617	-1.43068	0.0022589	0.0417024	down	-	-	gi|743826368|ref|XP_011022781.1| PREDICTED: uncharacterized protein LOC105124455 [Populus euphratica] 4.2e-42	gi|743826367|ref|XM_011024479.1| PREDICTED: Populus euphratica uncharacterized LOC105124455 (LOC105124455), mRNA 0.0	-	-	tr|B9HFH2|B9HFH2_POPTR Predicted protein OS=Populus trichocarpa GN=POPTRDRAFT_562611 PE=4 SV=1 3.8e-45	GO:0016021, integral component of membrane	-
TRINITY_DN47580_c5_g1	55.6993	15.5838	1.83761	2.09e-05	0.00136343	up	-	-	gi|224082103|ref|XP_002306566.1| VQ motif-containing family protein [Populus trichocarpa] 1.5e-63	gi|566171853|ref|XM_002306530.2| Populus trichocarpa VQ motif-containing family protein (POPTR_0005s17320g) mRNA, complete cds 0.0	-	sp|Q9M9F0|VQ9_ARATH VQ motif-containing protein 9 OS=Arabidopsis thaliana GN=VQ9 PE=1 SV=1 4.76513e-15	tr|B9H707|B9H707_POPTR Predicted protein OS=Populus trichocarpa GN=POPTRDRAFT_651250 PE=4 SV=1 6.2e-64	GO:0005634, nucleus;GO:0006883, cellular sodium ion homeostasis;GO:0030007, cellular potassium ion homeostasis;GO:0043433, negative regulation of sequence-specific DNA binding transcription factor activity;GO:1901001, negative regulation of response to salt stress	-
TRINITY_DN50838_c1_g4	20.1851	8.79125	1.19915	0.000783864	0.0205882	up	-	-	-	gi|566231243|ref|XM_002325368.2| Populus trichocarpa thioredoxin-like 7 family protein (POPTR_0019s04750g) mRNA, complete cds 3.32282e-179	-	-	-	-	-
TRINITY_DN50838_c1_g1	25.8673	9.3695	1.46509	3.66e-06	0.000347576	up	cd02947, TRX_family, TRX family; composed of two groups: Group I, which includes proteins that exclusively encode a TRX domain; and Group II, which are composed of fusion proteins of TRX and additional domains. Group I TRX is a small ancient protein that alter the redox state of target proteins via the reversible oxidation of an active site dithiol, present in a CXXC motif, partially exposed at t…	KOG0907, KOG0907, KOG0907, Thioredoxin [Posttranslational modification, protein turnover, chaperones]. 2.55593e-19	gi|224144761|ref|XP_002325404.1| thioredoxin-like 7 family protein [Populus trichocarpa] 5.2e-134	gi|566231243|ref|XM_002325368.2| Populus trichocarpa thioredoxin-like 7 family protein (POPTR_0019s04750g) mRNA, complete cds 0.0	pfam00085, Thioredoxin, Thioredoxin. Thioredoxins are small enzymes that participate in redox reactions, via the reversible oxidation of an active centre disulfide bond. Some members with only the active site are not separated from the noise. 3.68739e-07	sp|O64654|TRL11_ARATH Thioredoxin-like 1-1, chloroplastic OS=Arabidopsis thaliana GN=At1g08570 PE=2 SV=1 2.4666e-104	tr|B9IPM3|B9IPM3_POPTR Predicted protein OS=Populus trichocarpa GN=POPTRDRAFT_738413 PE=4 SV=1 2.2e-134	GO:0000103, sulfate assimilation;GO:0006457, protein folding;GO:0006662, glycerol ether metabolic process;GO:0009507, chloroplast;GO:0009570, chloroplast stroma;GO:0015035, protein disulfide oxidoreductase activity;GO:0016671, oxidoreductase activity, acting on a sulfur group of donors, disulfide as acceptor;GO:0031969, chloroplast membrane;GO:0034599, cellular response to oxidative stress;GO:004…	-
TRINITY_DN50838_c1_g2	95.8907	22.3937	2.0983	2.42e-09	7.5e-07	up	cd02947, TRX_family, TRX family; composed of two groups: Group I, which includes proteins that exclusively encode a TRX domain; and Group II, which are composed of fusion proteins of TRX and additional domains. Group I TRX is a small ancient protein that alter the redox state of target proteins via the reversible oxidation of an active site dithiol, present in a CXXC motif, partially exposed at t…	KOG0907, KOG0907, KOG0907, Thioredoxin [Posttranslational modification, protein turnover, chaperones]. 2.37794e-18	gi|743873172|ref|XP_011034328.1| PREDICTED: thioredoxin-like 1-1, chloroplastic [Populus euphratica] 5.2e-63	gi|166091645|gb|AC216914.1| Populus trichocarpa clone POP036-E01, complete sequence 0.0	pfam00085, Thioredoxin, Thioredoxin. Thioredoxins are small enzymes that participate in redox reactions, via the reversible oxidation of an active centre disulfide bond. Some members with only the active site are not separated from the noise. 7.18221e-08	sp|O64654|TRL11_ARATH Thioredoxin-like 1-1, chloroplastic OS=Arabidopsis thaliana GN=At1g08570 PE=2 SV=1 5.35173e-66	tr|A9PI73|A9PI73_POPTR Predicted protein OS=Populus trichocarpa GN=POPTRDRAFT_730026 PE=2 SV=1 4.8e-63	GO:0000103, sulfate assimilation;GO:0005623, cell;GO:0006457, protein folding;GO:0006662, glycerol ether metabolic process;GO:0009507, chloroplast;GO:0009570, chloroplast stroma;GO:0015035, protein disulfide oxidoreductase activity;GO:0016671, oxidoreductase activity, acting on a sulfur group of donors, disulfide as acceptor;GO:0031969, chloroplast membrane;GO:0034599, cellular response to oxidat…	-
TRINITY_DN50838_c1_g3	105.942	29.0268	1.86781	8.61e-08	1.53e-05	up	-	-	-	gi|166091645|gb|AC216914.1| Populus trichocarpa clone POP036-E01, complete sequence 0.0	-	-	-	-	-
TRINITY_DN55686_c1_g1	68.5421	22.8068	1.58752	3.95e-05	0.00225153	up	-	-	gi|743876973|ref|XP_011035339.1| PREDICTED: protein REVEILLE 1-like isoform X2 [Populus euphratica] 1.3e-164	gi|566165393|ref|XM_006384056.1| Populus trichocarpa hypothetical protein (POPTR_0004s07270g) mRNA, complete cds 0.0	-	sp|F4KGY6|RVE1_ARATH Protein REVEILLE 1 OS=Arabidopsis thaliana GN=RVE1 PE=2 SV=1 2.45102e-32	tr|B9SKS0|B9SKS0_RICCO DNA binding protein, putative OS=Ricinus communis GN=RCOM_1604380 PE=4 SV=1 3.3e-93	GO:0003677, DNA binding;GO:0003700, transcription factor activity, sequence-specific DNA binding;GO:0005634, nucleus;GO:0006351, transcription, DNA-templated;GO:0006355, regulation of transcription, DNA-templated;GO:0007623, circadian rhythm;GO:0009734, auxin-activated signaling pathway;GO:0009851, auxin biosynthetic process;GO:0010600, regulation of auxin biosynthetic process	-
TRINITY_DN51743_c0_g1	0.505036	5.25735	-3.37988	6.29e-07	8.31e-05	down	-	-	-	gi|566182496|ref|XM_002311125.2| Populus trichocarpa heat shock protein 70 (POPTR_0008s05410g) mRNA, complete cds 8.69366e-84	-	-	-	-	-
TRINITY_DN45720_c0_g1	0.0001	8.24208	-16.3307	2.02e-09	6.4e-07	down	-	-	-	gi|114158741|gb|AC184084.2| Populus trichocarpa clone Pop1-57B11, complete sequence 0.0	-	sp|O03986|HS904_ARATH Heat shock protein 90-4 OS=Arabidopsis thaliana GN=HSP90-4 PE=1 SV=1 7.08241e-07	-	GO:0005524, ATP binding;GO:0005618, cell wall;GO:0005634, nucleus;GO:0005774, vacuolar membrane;GO:0005794, Golgi apparatus;GO:0005829, cytosol;GO:0005886, plasma membrane;GO:0006457, protein folding;GO:0006950, response to stress;GO:0009570, chloroplast stroma;GO:0048046, apoplast	-
TRINITY_DN50092_c0_g2	8.74837	0.815717	3.42287	3.28e-08	6.95e-06	up	-	-	gi|566202323|ref|XP_006375035.1| hypothetical protein POPTR_0014s03800g [Populus trichocarpa] 1.3e-41	gi|157385051|gb|AC210503.1| Populus trichocarpa clone POP004-G08, complete sequence 0.0	-	-	tr|B9MVH2|B9MVH2_POPTR Predicted protein OS=Populus trichocarpa GN=POPTRDRAFT_591857 PE=4 SV=1 5.3e-42	-	-
TRINITY_DN41598_c0_g1	2.19103	14.526	-2.72896	0.00063968	0.0178195	down	-	KOG1052, KOG1052, KOG1052, Glutamate-gated kainate-type ion channel receptor subunit GluR5 and related subunits [Inorganic ion transport and metabolism, Amino acid transport and metabolism, Signal transduction mechanisms]. 5.38507e-07	gi|566165029|ref|XP_002305094.2| hypothetical protein POPTR_0004s05170g [Populus trichocarpa] 1.1e-36	gi|566165028|ref|XM_002305058.2| Populus trichocarpa hypothetical protein (POPTR_0004s05170g) mRNA, complete cds 4.22433e-152	-	sp|Q8GXJ4|GLR34_ARATH Glutamate receptor 3.4 OS=Arabidopsis thaliana GN=GLR3.4 PE=2 SV=2 2.77232e-06	tr|B9H2M3|B9H2M3_POPTR Glutamate-gated kainate-type ion channel receptor subunit GluR5 OS=Populus trichocarpa GN=POPTRDRAFT_758820 PE=4 SV=1 4.6e-37	GO:0004970, ionotropic glutamate receptor activity;GO:0005262, calcium channel activity;GO:0005886, plasma membrane;GO:0006816, calcium ion transport;GO:0008066, glutamate receptor activity;GO:0009507, chloroplast;GO:0009536, plastid;GO:0009611, response to wounding;GO:0015276, ligand-gated ion channel activity;GO:0016021, integral component of membrane;GO:0019722, calcium-mediated signaling;GO:0…	-
TRINITY_DN53720_c1_g1	66.8899	27.8068	1.26635	0.00105111	0.0251257	up	cd06472, ACD_ScHsp26_like, Alpha crystallin domain (ACD) found in Saccharomyces cerevisiae (Sc) small heat shock protein (Hsp)26 and similar proteins. sHsps are molecular chaperones that suppress protein aggregation and protect against cell stress, and are generally active as large oligomers consisting of multiple subunits. ScHsp26 is temperature-regulated, it switches from an inactive to a chape…	KOG0710, KOG0710, KOG0710, Molecular chaperone (small heat-shock protein Hsp26/Hsp42) [Posttranslational modification, protein turnover, chaperones]. 5.06151e-23	gi|743812897|ref|XP_011019383.1| PREDICTED: 17.9 kDa class II heat shock protein-like [Populus euphratica] 8.2e-61	gi|566177848|ref|XM_002308501.2| Populus trichocarpa heat shock protein 17.7 (POPTR_0006s24030g) mRNA, complete cds 0.0	pfam00011, HSP20, Hsp20/alpha crystallin family. Not only do small heat-shock-proteins occur in eukaryotes and prokaryotes but they have also now been shown to occur in cyanobacterial phages as well as their bacterial hosts. 7.96933e-11	sp|P05477|HSP21_SOYBN 17.9 kDa class II heat shock protein OS=Glycine max GN=HSP17.9-D PE=3 SV=1 2.47671e-62	tr|A9PA59|A9PA59_POPTR Predicted protein OS=Populus trichocarpa GN=POPTRDRAFT_832078 PE=2 SV=1 9.9e-61	GO:0005737, cytoplasm	K13993-ko04141 Protein processing in endoplasmic reticulum
TRINITY_DN45371_c0_g1	28.159	112.508	-1.99836	7e-05	0.00349846	down	PTZ00184, PTZ00184, calmodulin; Provisional. 8.66205e-27	KOG0027, KOG0027, KOG0027, Calmodulin and related proteins (EF-Hand superfamily) [Signal transduction mechanisms]. 1.09543e-33	gi|224079441|ref|XP_002305867.1| putative calmodulin-related family protein [Populus trichocarpa] 2.8e-72	gi|566171324|ref|XM_006383254.1| Populus trichocarpa putative calmodulin-related family protein (POPTR_0005s14430g) mRNA, complete cds 0.0	pfam13499, EF-hand_7, EF-hand domain pair. 5.98424e-07	sp|Q9C8Y1|CML23_ARATH Probable calcium-binding protein CML23 OS=Arabidopsis thaliana GN=CML23 PE=2 SV=1 2.17917e-45	tr|B9H383|B9H383_POPTR Predicted protein OS=Populus trichocarpa GN=POPTRDRAFT_648111 PE=4 SV=1 1.2e-72	GO:0005509, calcium ion binding;GO:0009909, regulation of flower development;GO:0080164, regulation of nitric oxide metabolic process	-
TRINITY_DN43887_c0_g1	458.522	166.086	1.46506	2.05e-07	3.28e-05	up	COG2764, PhnB, Uncharacterized protein conserved in bacteria [Function unknown]. 6.54887e-10	-	gi|224069912|ref|XP_002303084.1| hypothetical protein POPTR_0002s25260g [Populus trichocarpa] 3.3e-65	gi|566159900|ref|XM_002303048.2| Populus trichocarpa hypothetical protein (POPTR_0002s25260g) mRNA, complete cds 0.0	-	sp|Q9LV66|Y5848_ARATH Uncharacterized protein At5g48480 OS=Arabidopsis thaliana GN=At5g48480 PE=1 SV=1 5.68943e-20	tr|A9PGV8|A9PGV8_POPTR Predicted protein OS=Populus trichocarpa GN=POPTRDRAFT_830598 PE=2 SV=1 1.4e-65	GO:0005829, cytosol	-
TRINITY_DN54721_c0_g2	44.3406	20.9419	1.08224	3.12e-05	0.00187531	up	pfam00083, Sugar_tr, Sugar (and other) transporter. 2.84331e-22	KOG0254, KOG0254, KOG0254, Predicted transporter (major facilitator superfamily) [General function prediction only]. 4.86708e-30	gi|224089677|ref|XP_002308797.1| sugar transporter family protein [Populus trichocarpa] 5.0e-189	gi|566173941|ref|XM_002308761.2| Populus trichocarpa sugar transporter family protein (POPTR_0006s01630g) mRNA, complete cds 0.0	pfam00083, Sugar_tr, Sugar (and other) transporter. 6.79291e-23	sp|O23492|INT4_ARATH Inositol transporter 4 OS=Arabidopsis thaliana GN=INT4 PE=1 SV=1 1.92337e-154	tr|B9HCU9|B9HCU9_POPTR Predicted protein OS=Populus trichocarpa GN=POPTRDRAFT_831764 PE=3 SV=1 2.1e-189	GO:0005351, sugar:proton symporter activity;GO:0005355, glucose transmembrane transporter activity;GO:0005886, plasma membrane;GO:0005887, integral component of plasma membrane;GO:0035428, hexose transmembrane transport;GO:0046323, glucose import	-
TRINITY_DN48341_c1_g1	107.031	46.7542	1.19486	8.27e-06	0.000660958	up	PLN02469, PLN02469, hydroxyacylglutathione hydrolase. 1.52265e-140	KOG0813, KOG0813, KOG0813, Glyoxylase [General function prediction only]. 5.2534e-59	gi|566237931|ref|XP_006371323.1| Hydroxyacylglutathione hydrolase cytoplasmic family protein [Populus trichocarpa] 3.4e-123	gi|566237930|ref|XM_006371261.1| Populus trichocarpa Hydroxyacylglutathione hydrolase cytoplasmic family protein (POPTR_0019s09090g) mRNA, complete cds 0.0	pfam16123, HAGH_C, Hydroxyacylglutathione hydrolase C-terminus. This domain is found at the C-terminus of hydroxyacylglutathione hydrolase enzymes. Substrate binding occurs at the interface between this domain and the catalytic domain (pfam00753). 5.68783e-18	sp|O24496|GLO2C_ARATH Hydroxyacylglutathione hydrolase cytoplasmic OS=Arabidopsis thaliana GN=GLX2-2 PE=1 SV=2 2.21134e-133	tr|B9N1T0|B9N1T0_POPTR Predicted protein OS=Populus trichocarpa GN=POPTRDRAFT_827863 PE=3 SV=1 1.4e-123	GO:0004416, hydroxyacylglutathione hydrolase activity;GO:0005829, cytosol;GO:0019243, methylglyoxal catabolic process to D-lactate via S-lactoyl-glutathione;GO:0046872, metal ion binding	K01069-ko00620 Pyruvate metabolism
TRINITY_DN52457_c0_g4	53.0537	10.9701	2.27388	5.58e-05	0.00293626	up	-	-	gi|566254712|ref|XP_006387565.1| hypothetical protein POPTR_0840s00200g [Populus trichocarpa] 3.4e-26	gi|566209498|ref|XM_002323445.2| Populus trichocarpa hypothetical protein (POPTR_0016s09600g) mRNA, complete cds 5.64539e-95	-	-	tr|B9PDH9|B9PDH9_POPTR Predicted protein OS=Populus trichocarpa GN=POPTRDRAFT_585437 PE=4 SV=1 1.4e-26	-	-
TRINITY_DN44628_c0_g1	18.6322	3.91788	2.24965	6.11e-07	8.18e-05	up	TIGR02189, glutaredoxin-like_protein, Glutaredoxin-like family. This family of glutaredoxin-like proteins is aparrently limited to plants. Multiple isoforms are found in A. thaliana and O.sativa. 2.9355e-36	KOG1752, KOG1752, KOG1752, Glutaredoxin and related proteins [Posttranslational modification, protein turnover, chaperones]. 1.85359e-28	gi|224128552|ref|XP_002320360.1| glutaredoxin family protein [Populus trichocarpa] 4.8e-53	gi|224128551|ref|XM_002320324.1| Populus trichocarpa glutaredoxin family protein (POPTR_0014s12870g) mRNA, complete cds 0.0	-	sp|Q9LYC6|GRC11_ARATH Glutaredoxin-C11 OS=Arabidopsis thaliana GN=GRXC11 PE=3 SV=1 5.50303e-53	tr|B9I9W1|B9I9W1_POPTR Glutaredoxin OS=Populus trichocarpa GN=PtrGrx6 PE=4 SV=1 2.0e-53	GO:0005623, cell;GO:0005737, cytoplasm;GO:0009055, electron carrier activity;GO:0015035, protein disulfide oxidoreductase activity;GO:0045454, cell redox homeostasis	-
TRINITY_DN55229_c2_g2	2.03145	8.91801	-2.13421	0.000149659	0.00629941	down	TIGR02917, TPR_domain_protein, putative PEP-CTERM system TPR-repeat lipoprotein. This protein family occurs in strictly within a subset of Gram-negative bacterial species with the proposed PEP-CTERM/exosortase system, analogous to the LPXTG/sortase system common in Gram-positive bacteria. This protein occurs in a species if and only if a transmembrane histidine kinase (TIGR02916) and a DNA-bindin…	KOG2076, KOG2076, KOG2076, RNA polymerase III transcription factor TFIIIC [Transcription]. 1.9744e-34	gi|743884724|ref|XP_011037353.1| PREDICTED: general transcription factor 3C polypeptide 3 [Populus euphratica] 1.1e-213	gi|743884723|ref|XM_011039051.1| PREDICTED: Populus euphratica general transcription factor 3C polypeptide 3 (LOC105134590), transcript variant X1, mRNA 0.0	-	sp|Q9Y5Q9|TF3C3_HUMAN General transcription factor 3C polypeptide 3 OS=Homo sapiens GN=GTF3C3 PE=1 SV=1 3.91383e-24	tr|B9N5W7|B9N5W7_POPTR Predicted protein OS=Populus trichocarpa GN=POPTRDRAFT_582731 PE=2 SV=1 7.0e-215	GO:0000127, transcription factor TFIIIC complex;GO:0003677, DNA binding;GO:0005634, nucleus;GO:0005654, nucleoplasm;GO:0005730, nucleolus;GO:0006351, transcription, DNA-templated;GO:0006383, transcription from RNA polymerase III promoter;GO:0031965, nuclear membrane;GO:0042791, 5S class rRNA transcription from RNA polymerase III type 1 promoter;GO:0042797, tRNA transcription from RNA polymerase I…	-
TRINITY_DN43017_c0_g1	2.39426	13.6177	-2.50784	3.98e-05	0.00226478	down	-	-	-	gi|110578676|gb|AC185353.2| Populus trichocarpa clone Pop1-100A20, complete sequence 0.0	-	sp|O23596|GLPT4_ARATH Putative glycerol-3-phosphate transporter 4 OS=Arabidopsis thaliana GN=At4g17550 PE=3 SV=2 2.90877e-07	-	GO:0005774, vacuolar membrane;GO:0006820, anion transport;GO:0008643, carbohydrate transport;GO:0016021, integral component of membrane;GO:0022857, transmembrane transporter activity;GO:0055062, phosphate ion homeostasis;GO:0055085, transmembrane transport	-
TRINITY_DN54324_c0_g1	28.6194	7.41699	1.94809	0.000441201	0.0137173	up	-	KOG1187, KOG1187, KOG1187, Serine/threonine protein kinase [Signal transduction mechanisms]. 8.09474e-06	gi|743883528|ref|XP_011037047.1| PREDICTED: probable receptor-like protein kinase At5g39020 isoform X1 [Populus euphratica] 3.4e-58	gi|566211753|ref|XM_006372867.1| Populus trichocarpa hypothetical protein (POPTR_0017s06330g) mRNA, complete cds 0.0	-	sp|P93604|LRK10_WHEAT Rust resistance kinase Lr10 OS=Triticum aestivum GN=LRK10 PE=2 SV=1 8.30822e-18	tr|B9MXZ8|B9MXZ8_POPTR Predicted protein (Fragment) OS=Populus trichocarpa GN=POPTRDRAFT_292580 PE=3 SV=1 5.6e-47	GO:0004674, protein serine/threonine kinase activity;GO:0005524, ATP binding;GO:0005886, plasma membrane;GO:0016021, integral component of membrane	-
TRINITY_DN55932_c0_g2	9.91755	29.3246	-1.56406	9.63e-05	0.00447439	down	-	-	gi|224055255|ref|XP_002298446.1| hypothetical protein POPTR_0001s27680g [Populus trichocarpa] 1.3e-171	gi|566151340|ref|XM_002298410.2| Populus trichocarpa hypothetical protein (POPTR_0001s27680g) mRNA, complete cds 0.0	-	sp|Q66GR3|BH130_ARATH Transcription factor bHLH130 OS=Arabidopsis thaliana GN=BHLH130 PE=1 SV=1 7.81784e-27	tr|B9GFQ9|B9GFQ9_POPTR Predicted protein OS=Populus trichocarpa GN=POPTRDRAFT_1068482 PE=4 SV=1 5.3e-172	GO:0001046, core promoter sequence-specific DNA binding;GO:0001228, transcriptional activator activity, RNA polymerase II transcription regulatory region sequence-specific binding;GO:0003700, transcription factor activity, sequence-specific DNA binding;GO:0005634, nucleus;GO:0006355, regulation of transcription, DNA-templated;GO:0006366, transcription from RNA polymerase II promoter;GO:0048573, p…	-
TRINITY_DN48969_c0_g1	103.715	41.9166	1.30703	0.00097896	0.0239219	up	-	-	gi|566185140|ref|XP_002312755.2| hypothetical protein POPTR_0008s20950g [Populus trichocarpa] 8.8e-15	gi|566185139|ref|XM_002312719.2| Populus trichocarpa hypothetical protein (POPTR_0008s20950g) mRNA, complete cds 1.19426e-122	-	sp|B9HMP5|CSPLD_POPTR CASP-like protein 1D1 OS=Populus trichocarpa GN=POPTRDRAFT_820933 PE=3 SV=2 1.09461e-26	-	GO:0005886, plasma membrane;GO:0016021, integral component of membrane	-
TRINITY_DN48969_c0_g2	20.5718	5.09491	2.01354	2.53e-08	5.69e-06	up	-	-	gi|566199528|ref|XP_002319143.2| hypothetical protein POPTR_0013s05080g [Populus trichocarpa] 1.6e-17	gi|166006859|gb|AC216771.1| Populus trichocarpa clone POP051-N07, complete sequence 0.0	-	-	tr|B9I5U7|B9I5U7_POPTR NAC domain protein, IPR003441 (Fragment) OS=Populus trichocarpa GN=NAC026 PE=4 SV=1 6.9e-18	GO:0003677, DNA binding;GO:0005634, nucleus;GO:0006351, transcription, DNA-templated;GO:0006355, regulation of transcription, DNA-templated	-
TRINITY_DN48969_c0_g5	84.7213	36.7364	1.20552	0.000439183	0.0136943	up	TIGR01569, hypothetical_protein, plant integral membrane protein TIGR01569. This model describes a region of ~160 residues found exclusively in plant proteins, generally as the near complete length of the protein. At least 24 different members are found in Arabidopsis thaliana. Members have four predicted transmembrane regions, the last of which is preceded by an invariant CXXXXX[FY]C motif. The …	-	gi|566185140|ref|XP_002312755.2| hypothetical protein POPTR_0008s20950g [Populus trichocarpa] 5.5e-50	gi|566185139|ref|XM_002312719.2| Populus trichocarpa hypothetical protein (POPTR_0008s20950g) mRNA, complete cds 0.0	pfam04535, DUF588, Domain of unknown function (DUF588). This family of plant proteins contains a domain that may have a catalytic activity. It has a conserved arginine and aspartate that could form an active site. These proteins are predicted to contain 3 or 4 transmembrane helices. 1.7264e-12	sp|B9HMP5|CSPLD_POPTR CASP-like protein 1D1 OS=Populus trichocarpa GN=POPTRDRAFT_820933 PE=3 SV=2 4.49166e-67	tr|B9HMP4|B9HMP4_POPTR Predicted protein OS=Populus trichocarpa GN=POPTRDRAFT_766848 PE=2 SV=1 1.4e-31	GO:0005886, plasma membrane;GO:0016021, integral component of membrane	-
TRINITY_DN47377_c0_g2	74.1516	16.8055	2.14155	1.35e-08	3.43e-06	up	pfam01490, Aa_trans, Transmembrane amino acid transporter protein. This transmembrane region is found in many amino acid transporters including UNC-47 and MTR. UNC-47 encodes a vesicular amino butyric acid (GABA) transporter, (VGAT). UNC-47 is predicted to have 10 transmembrane domains. MTR is a N system amino acid transporter system protein involved in methyltryptophan resistance. Other members …	KOG1303, KOG1303, KOG1303, Amino acid transporters [Amino acid transport and metabolism]. 2.63826e-63	gi|566172339|ref|XP_006383588.1| hypothetical protein POPTR_0005s20390g [Populus trichocarpa] 6.3e-174	gi|566172338|ref|XM_006383526.1| Populus trichocarpa hypothetical protein (POPTR_0005s20390g) mRNA, complete cds 0.0	pfam01490, Aa_trans, Transmembrane amino acid transporter protein. This transmembrane region is found in many amino acid transporters including UNC-47 and MTR. UNC-47 encodes a vesicular amino butyric acid (GABA) transporter, (VGAT). UNC-47 is predicted to have 10 transmembrane domains. MTR is a N system amino acid transporter system protein involved in methyltryptophan resistance. Other members …	sp|Q39134|AAP3_ARATH Amino acid permease 3 OS=Arabidopsis thaliana GN=AAP3 PE=1 SV=2 0.0	tr|B9P4S8|B9P4S8_POPTR Amino acid permease OS=Populus trichocarpa GN=PtrAAP6 PE=4 SV=1 2.2e-165	GO:0003333, amino acid transmembrane transport;GO:0005886, plasma membrane;GO:0015171, amino acid transmembrane transporter activity;GO:0015293, symporter activity;GO:0015802, basic amino acid transport;GO:0016021, integral component of membrane;GO:0031965, nuclear membrane	-
TRINITY_DN50524_c0_g3	464.735	77.9004	2.57671	4.06e-09	1.17e-06	up	PLN02242, PLN02242, methionine gamma-lyase. 0.0	KOG0053, KOG0053, KOG0053, Cystathionine beta-lyases/cystathionine gamma-synthases [Amino acid transport and metabolism]. 2.26981e-54	gi|224057996|ref|XP_002299428.1| Cys/Met metabolism pyridoxal-phosphate-dependent enzyme family protein [Populus trichocarpa] 1.5e-253	gi|224057995|ref|XM_002299392.1| Populus trichocarpa Cys/Met metabolism pyridoxal-phosphate-dependent enzyme family protein (POPTR_0001s11350g) mRNA, complete cds 0.0	pfam01053, Cys_Met_Meta_PP, Cys/Met metabolizm PLP-dependent enzyme. This family includes enzymes involved in cysteine and methionine metabolizm. The following are members: Cystathionine gamma-lyase, Cystathionine gamma-synthase, Cystathionine beta-lyase, Methionine gamma-lyase, OAH/OAS sulfhydrylase, O-succinylhomoserine sulfhydrylase All of these members participate is slightly different reacti…	sp|Q9SGU9|MGL_ARATH Methionine gamma-lyase OS=Arabidopsis thaliana GN=MGL PE=1 SV=1 0.0	tr|B9GK77|B9GK77_POPTR Predicted protein OS=Populus trichocarpa GN=POPTRDRAFT_709036 PE=2 SV=1 6.3e-254	GO:0003824, catalytic activity;GO:0005829, cytosol;GO:0009970, cellular response to sulfate starvation;GO:0018826, methionine gamma-lyase activity;GO:0019458, methionine catabolic process via 2-oxobutanoate;GO:0030170, pyridoxal phosphate binding;GO:0042631, cellular response to water deprivation;GO:0051289, protein homotetramerization	K01761-ko00270 Cysteine and methionine metabolism;ko00450 Selenocompound metabolism
TRINITY_DN50524_c0_g4	17.6322	0.993413	4.14968	0.00145319	0.0316744	up	PLN02242, PLN02242, methionine gamma-lyase. 0.0	KOG0053, KOG0053, KOG0053, Cystathionine beta-lyases/cystathionine gamma-synthases [Amino acid transport and metabolism]. 2.28473e-54	gi|566163392|ref|XP_002304835.2| hypothetical protein POPTR_0003s18600g [Populus trichocarpa] 1.2e-229	gi|566163391|ref|XM_002304799.2| Populus trichocarpa hypothetical protein (POPTR_0003s18600g) mRNA, complete cds 0.0	pfam01053, Cys_Met_Meta_PP, Cys/Met metabolizm PLP-dependent enzyme. This family includes enzymes involved in cysteine and methionine metabolizm. The following are members: Cystathionine gamma-lyase, Cystathionine gamma-synthase, Cystathionine beta-lyase, Methionine gamma-lyase, OAH/OAS sulfhydrylase, O-succinylhomoserine sulfhydrylase All of these members participate is slightly different reacti…	sp|Q9SGU9|MGL_ARATH Methionine gamma-lyase OS=Arabidopsis thaliana GN=MGL PE=1 SV=1 0.0	tr|B9GXM5|B9GXM5_POPTR Predicted protein OS=Populus trichocarpa GN=POPTRDRAFT_555144 PE=2 SV=1 1.6e-228	GO:0003824, catalytic activity;GO:0005829, cytosol;GO:0009970, cellular response to sulfate starvation;GO:0018826, methionine gamma-lyase activity;GO:0019458, methionine catabolic process via 2-oxobutanoate;GO:0030170, pyridoxal phosphate binding;GO:0042631, cellular response to water deprivation;GO:0051289, protein homotetramerization	-
TRINITY_DN45699_c0_g2	0.778945	10.5442	-3.75878	3.47e-05	0.002047	down	-	-	-	-	-	-	-	-	-
TRINITY_DN50639_c1_g3	32.1016	8.64462	1.89277	3.91e-07	5.53e-05	up	pfam13639, zf-RING_2, Ring finger domain. 2.31863e-12	KOG4628, KOG4628, KOG4628, Predicted E3 ubiquitin ligase [Posttranslational modification, protein turnover, chaperones]. 2.8562e-08	gi|566180267|ref|XP_002310694.2| hypothetical protein POPTR_0007s08550g [Populus trichocarpa] 2.5e-55	gi|156564445|gb|AC209100.1| Populus trichocarpa clone POP042-C19, complete sequence 0.0	pfam13639, zf-RING_2, Ring finger domain. 5.53939e-13	sp|Q9LM69|ATL80_ARATH RING-H2 finger protein ATL80 OS=Arabidopsis thaliana GN=ATL80 PE=2 SV=1 3.18433e-30	tr|B9HH21|B9HH21_POPTR Predicted protein OS=Populus trichocarpa GN=POPTRDRAFT_764466 PE=4 SV=1 1.2e-59	GO:0005886, plasma membrane;GO:0006952, defense response;GO:0008270, zinc ion binding;GO:0009909, regulation of flower development;GO:0010200, response to chitin;GO:0010966, regulation of phosphate transport;GO:0016021, integral component of membrane;GO:0061630, ubiquitin protein ligase activity;GO:0070417, cellular response to cold	-
TRINITY_DN50639_c1_g1	9.26502	1.89355	2.2907	1.59e-09	5.22e-07	up	pfam13639, zf-RING_2, Ring finger domain. 4.01813e-12	KOG4628, KOG4628, KOG4628, Predicted E3 ubiquitin ligase [Posttranslational modification, protein turnover, chaperones]. 8.27084e-09	gi|224084028|ref|XP_002307200.1| hypothetical protein POPTR_0005s10190g [Populus trichocarpa] 3.2e-87	gi|566170500|ref|XM_002307164.2| Populus trichocarpa hypothetical protein (POPTR_0005s10190g) mRNA, complete cds 0.0	pfam13639, zf-RING_2, Ring finger domain. 9.59966e-13	sp|Q9LM69|ATL80_ARATH RING-H2 finger protein ATL80 OS=Arabidopsis thaliana GN=ATL80 PE=2 SV=1 2.92877e-39	tr|A9P9N9|A9P9N9_POPTR Predicted protein OS=Populus trichocarpa GN=POPTRDRAFT_818355 PE=2 SV=1 1.3e-87	GO:0005886, plasma membrane;GO:0006952, defense response;GO:0008270, zinc ion binding;GO:0009909, regulation of flower development;GO:0010200, response to chitin;GO:0010966, regulation of phosphate transport;GO:0016021, integral component of membrane;GO:0061630, ubiquitin protein ligase activity;GO:0070417, cellular response to cold	-
TRINITY_DN49050_c1_g5	10.2287	2.15405	2.24749	1.36e-06	0.000154891	up	pfam13639, zf-RING_2, Ring finger domain. 1.55556e-06	KOG4628, KOG4628, KOG4628, Predicted E3 ubiquitin ligase [Posttranslational modification, protein turnover, chaperones]. 7.5603e-10	gi|566162399|ref|XP_002304513.2| hypothetical protein POPTR_0003s13080g [Populus trichocarpa] 5.7e-93	gi|743825788|ref|XM_011024333.1| PREDICTED: Populus euphratica E3 ubiquitin-protein ligase RHA1B-like (LOC105124349), mRNA 0.0	pfam13639, zf-RING_2, Ring finger domain. 3.71636e-07	sp|Q9SUS5|RHA1B_ARATH E3 ubiquitin-protein ligase RHA1B OS=Arabidopsis thaliana GN=RHA1B PE=2 SV=1 1.26609e-29	tr|B9GWU3|B9GWU3_POPTR Predicted protein OS=Populus trichocarpa GN=POPTRDRAFT_712346 PE=4 SV=1 5.5e-98	GO:0004842, ubiquitin-protein transferase activity;GO:0008270, zinc ion binding;GO:0010200, response to chitin;GO:0016567, protein ubiquitination;GO:0016874, ligase activity;GO:0046686, response to cadmium ion	-
TRINITY_DN57948_c2_g3	1.51055	5.28905	-1.80794	0.00139233	0.0307894	down	-	KOG1525, KOG1525, KOG1525, Sister chromatid cohesion complex Cohesin, subunit PDS5 [Cell cycle control, cell division, chromosome partitioning]. 1.88235e-65	gi|743893834|ref|XP_011040159.1| PREDICTED: sister chromatid cohesion protein PDS5 homolog A-like isoform X1 [Populus euphratica] 0.0e+00	gi|743893837|ref|XM_011041859.1| PREDICTED: Populus euphratica sister chromatid cohesion protein PDS5 homolog A-like (LOC105136481), transcript variant X3, mRNA 0.0	-	sp|Q5F3U9|PDS5B_CHICK Sister chromatid cohesion protein PDS5 homolog B OS=Gallus gallus GN=PDS5B PE=2 SV=3 5.04825e-42	tr|B9IH10|B9IH10_POPTR Predicted protein (Fragment) OS=Populus trichocarpa GN=POPTRDRAFT_254645 PE=4 SV=1 0.0e+00	GO:0005634, nucleus;GO:0007064, mitotic sister chromatid cohesion;GO:0008285, negative regulation of cell proliferation;GO:0051301, cell division	-
TRINITY_DN55387_c0_g2	11.5932	3.20504	1.85487	1.27e-06	0.000146852	up	-	-	gi|566154140|ref|XP_006370325.1| hypothetical protein POPTR_0001s41670g [Populus trichocarpa] 5.3e-98	gi|743902433|ref|XM_011046252.1| PREDICTED: Populus euphratica uncharacterized LOC105139700 (LOC105139700), transcript variant X1, mRNA 0.0	-	-	tr|B9N587|B9N587_POPTR Predicted protein OS=Populus trichocarpa GN=POPTRDRAFT_784916 PE=4 SV=1 2.2e-98	-	-
TRINITY_DN54443_c0_g1	188.888	35.3751	2.41673	2.22e-13	2.32e-10	up	-	-	gi|566174042|ref|XP_006380928.1| hypothetical protein POPTR_0006s02090g [Populus trichocarpa] 2.7e-40	gi|166157595|gb|AC216943.1| Populus trichocarpa clone POP051-N24, complete sequence 0.0	-	-	tr|B9NFT7|B9NFT7_POPTR Predicted protein OS=Populus trichocarpa GN=POPTRDRAFT_579371 PE=4 SV=1 1.9e-35	GO:0005737, cytoplasm;GO:0030001, metal ion transport;GO:0046914, transition metal ion binding;GO:0046916, cellular transition metal ion homeostasis	-
TRINITY_DN51158_c0_g2	32.7058	13.4395	1.28307	7.32e-05	0.00360404	up	cd06410, PB1_UP2, Uncharacterized protein 2. The PB1 domain is a modular domain mediating specific protein-protein interaction which play a role in many critical cell processes such as osteoclastogenesis, angiogenesis, early cardiovascular development, and cell polarity. A canonical PB1-PB1 interaction, which involves heterodimerization of two PB1 domains, is required for the formation of macromo…	-	gi|566197486|ref|XP_002318066.2| hypothetical protein POPTR_0012s08690g [Populus trichocarpa] 1.2e-85	gi|743908694|ref|XM_011049505.1| PREDICTED: Populus euphratica uncharacterized LOC105142057 (LOC105142057), transcript variant X1, mRNA 0.0	-	-	tr|B9I3D9|B9I3D9_POPTR Predicted protein OS=Populus trichocarpa GN=POPTRDRAFT_823375 PE=4 SV=1 7.9e-84	-	-
TRINITY_DN51158_c0_g1	14.2756	54.707	-1.93817	0.000919013	0.0229416	down	cd06410, PB1_UP2, Uncharacterized protein 2. The PB1 domain is a modular domain mediating specific protein-protein interaction which play a role in many critical cell processes such as osteoclastogenesis, angiogenesis, early cardiovascular development, and cell polarity. A canonical PB1-PB1 interaction, which involves heterodimerization of two PB1 domains, is required for the formation of macromo…	-	gi|224133658|ref|XP_002321629.1| octicosapeptide/Phox/Bem1p domain-containing family protein [Populus trichocarpa] 3.2e-66	gi|566206785|ref|XM_002321593.2| Populus trichocarpa octicosapeptide/Phox/Bem1p domain-containing family protein (POPTR_0015s09500g) mRNA, complete cds 0.0	-	-	tr|B9IEY3|B9IEY3_POPTR Predicted protein OS=Populus trichocarpa GN=POPTRDRAFT_575231 PE=4 SV=1 1.3e-66	-	-
TRINITY_DN50098_c0_g1	15.9963	1.49648	3.41809	1.75e-21	1.1e-17	up	-	-	gi|743824008|ref|XP_011022123.1| PREDICTED: NAC domain-containing protein 21/22 [Populus euphratica] 1.2e-164	gi|743824007|ref|XM_011023821.1| PREDICTED: Populus euphratica NAC domain-containing protein 21/22 (LOC105124001), mRNA 0.0	-	sp|Q84TE6|NAC22_ARATH NAC domain-containing protein 21/22 OS=Arabidopsis thaliana GN=NAC021 PE=1 SV=2 6.32556e-112	tr|B9H640|B9H640_POPTR NAC domain protein, IPR003441 OS=Populus trichocarpa GN=NAC081 PE=4 SV=1 1.0e-168	GO:0003677, DNA binding;GO:0003700, transcription factor activity, sequence-specific DNA binding;GO:0005634, nucleus;GO:0006351, transcription, DNA-templated;GO:0006355, regulation of transcription, DNA-templated;GO:0009734, auxin-activated signaling pathway;GO:0010072, primary shoot apical meristem specification;GO:0048527, lateral root development	-
TRINITY_DN56582_c0_g1	2.79034	14.1963	-2.34701	5.65e-05	0.00296341	down	smart00504, Ubox, Modified RING finger domain. Modified RING finger domain, without the full complement of Zn2+-binding ligands. Probable involvement in E2-dependent ubiquitination. 1.55164e-13	KOG4224, KOG4224, KOG4224, Armadillo repeat protein VAC8 required for vacuole fusion, inheritance and cytosol-to-vacuole protein targeting [Intracellular trafficking, secretion, and vesicular transport]. 9.36648e-07	gi|566181046|ref|XP_006380766.1| hypothetical protein POPTR_0007s13010g [Populus trichocarpa] 0.0e+00	gi|566181045|ref|XM_006380704.1| Populus trichocarpa hypothetical protein (POPTR_0007s13010g) mRNA, complete cds 0.0	pfam04564, U-box, U-box domain. This domain is related to the Ring finger pfam00097 but lacks the zinc binding residues. 4.66917e-09	sp|O23225|PUB5_ARATH U-box domain-containing protein 5 OS=Arabidopsis thaliana GN=PUB5 PE=3 SV=3 2.71159e-153	tr|B9HF16|B9HF16_POPTR Predicted protein OS=Populus trichocarpa GN=POPTRDRAFT_802937 PE=4 SV=1 0.0e+00	GO:0004842, ubiquitin-protein transferase activity;GO:0016874, ligase activity	-
TRINITY_DN42298_c0_g1	14.8649	44.4315	-1.57968	0.00156681	0.0329754	down	PLN02950, PLN02950, 4-alpha-glucanotransferase. 4.02267e-70	-	gi|743896143|ref|XP_011041346.1| PREDICTED: 4-alpha-glucanotransferase DPE2-like [Populus euphratica] 3.8e-85	gi|566208367|ref|XM_002323172.2| Populus trichocarpa hypothetical protein (POPTR_0016s02870g) mRNA, complete cds 0.0	-	sp|Q8RXD9|DPE2_ARATH 4-alpha-glucanotransferase DPE2 OS=Arabidopsis thaliana GN=DPE2 PE=1 SV=1 4.16684e-62	tr|B9IHJ8|B9IHJ8_POPTR Predicted protein (Fragment) OS=Populus trichocarpa GN=POPTRDRAFT_255128 PE=4 SV=1 3.0e-84	GO:0000023, maltose metabolic process;GO:0000025, maltose catabolic process;GO:0004134, 4-alpha-glucanotransferase activity;GO:0005829, cytosol;GO:0005976, polysaccharide metabolic process;GO:0005983, starch catabolic process;GO:0010297, heteropolysaccharide binding;GO:2001070, starch binding	-
TRINITY_DN48740_c0_g2	51.1851	12.9562	1.98208	0.000297217	0.0103789	up	-	-	-	gi|566173165|ref|XM_002307642.2| Populus trichocarpa Tic20 family protein (POPTR_0005s25300g) mRNA, complete cds 1.02841e-62	-	-	-	-	-
TRINITY_DN49430_c0_g1	5.0201	28.1208	-2.48585	5.67e-06	0.000491316	down	cd05472, cnd41_like, Chloroplast Nucleoids DNA-binding Protease, catalyzes the degradation of ribulose-1,5-bisphosphate carboxylase/oxygenase. Chloroplast Nucleoids DNA-binding Protease catalyzes the degradation of ribulose-1,5-bisphosphate carboxylase/oxygenase (Rubisco) in senescent leaves of tobacco. Antisense tobacco with reduced amount of CND41 maintained green leaves and constant protein le…	KOG1339, KOG1339, KOG1339, Aspartyl protease [Posttranslational modification, protein turnover, chaperones]. 1.46728e-41	gi|566163557|ref|XP_002303933.2| hypothetical protein POPTR_0003s19490g [Populus trichocarpa] 4.9e-240	gi|566163556|ref|XM_002303897.2| Populus trichocarpa hypothetical protein (POPTR_0003s19490g) mRNA, complete cds 0.0	pfam14541, TAXi_C, Xylanase inhibitor C-terminal. The N- and C-termini of the members of this family are jointly necessary for creating the catalytic pocket necessary for cleaving xylasnase. Phytopathogens produce xylanase that destroys plant cells, so its destruction through proteolysis is vital for plant-survival. 5.47536e-13	sp|O04496|AED3_ARATH Aspartyl protease AED3 OS=Arabidopsis thaliana GN=AED3 PE=1 SV=1 3.29939e-131	tr|B9GWZ3|B9GWZ3_POPTR Predicted protein OS=Populus trichocarpa GN=POPTRDRAFT_800230 PE=4 SV=1 1.2e-208	GO:0004190, aspartic-type endopeptidase activity;GO:0005618, cell wall;GO:0006508, proteolysis;GO:0009505, plant-type cell wall;GO:0009627, systemic acquired resistance;GO:0030163, protein catabolic process;GO:0048046, apoplast	-
TRINITY_DN47412_c0_g2	0.505818	5.55105	-3.45607	3.43e-07	4.94e-05	down	-	-	-	gi|566159348|ref|XM_006386738.1| Populus trichocarpa hypothetical protein (POPTR_0002s22040g) mRNA, complete cds 0.0	-	-	-	-	-
TRINITY_DN52426_c0_g1	18.1433	57.2534	-1.65792	0.00152099	0.0324996	down	pfam11250, FAF, Fantastic Four meristem regulator. FAF is a family of plant proteins that regulate the size of the shoot meristem by modulating the CLV3-WUS feedback loop. The proteins are expressed in the centre of the shoot meristem, overlapping with the site of WUS - the homeodomain transcription factor WUSCHEL- expression. FAF proteins are capable of modulating shoot growth by repressing WUS …	-	gi|743902511|ref|XP_011044595.1| PREDICTED: protein FAF-like, chloroplastic [Populus euphratica] 1.7e-195	gi|743902510|ref|XM_011046293.1| PREDICTED: Populus euphratica protein FAF-like, chloroplastic (LOC105139734), mRNA 0.0	pfam11250, FAF, Fantastic Four meristem regulator. FAF is a family of plant proteins that regulate the size of the shoot meristem by modulating the CLV3-WUS feedback loop. The proteins are expressed in the centre of the shoot meristem, overlapping with the site of WUS - the homeodomain transcription factor WUSCHEL- expression. FAF proteins are capable of modulating shoot growth by repressing WUS …	sp|Q0V865|FAFL_ARATH Protein FAF-like, chloroplastic OS=Arabidopsis thaliana GN=At5g22090 PE=2 SV=1 1.36471e-22	tr|B9GHM0|B9GHM0_POPTR Predicted protein OS=Populus trichocarpa GN=POPTRDRAFT_797589 PE=4 SV=1 4.5e-174	GO:0009507, chloroplast	-
TRINITY_DN52426_c0_g2	2.69838	16.7523	-2.6342	0.000124693	0.00550915	down	-	-	-	gi|566185887|ref|XM_002314219.2| Populus trichocarpa hypothetical protein (POPTR_0009s02170g) mRNA, complete cds 0.0	-	-	-	-	-
TRINITY_DN57959_c3_g3	1.30253	5.56019	-2.09382	0.00194299	0.0377079	down	cd15532, PHD2_CHD_II, PHD finger 2 found in class II Chromodomain-Helicase-DNA binding (CHD) proteins. Class II CHD proteins includes chromodomain-helicase-DNA-binding protein CHD3, CHD4, and CHD5, which are nuclear and ubiquitously expressed chromatin remodelling ATPases generally associated with histone deacetylases (HDACs). They are involved in DNA Double Strand Break (DSB) signaling, DSB repa…	KOG0383, KOG0383, KOG0383, Predicted helicase [General function prediction only]. 5.72884e-09	gi|566186416|ref|XP_002313363.2| hypothetical protein POPTR_0009s05370g [Populus trichocarpa] 1.8e-175	gi|566186415|ref|XM_002313327.2| Populus trichocarpa hypothetical protein (POPTR_0009s05370g) mRNA, complete cds 0.0	-	sp|F4JYC8|PTM_ARATH DDT domain-containing protein PTM OS=Arabidopsis thaliana GN=PTM PE=1 SV=1 1.59731e-41	tr|B9RIG6|B9RIG6_RICCO Putative uncharacterized protein OS=Ricinus communis GN=RCOM_1578820 PE=4 SV=1 1.7e-111	GO:0005634, nucleus;GO:0006351, transcription, DNA-templated;GO:0006355, regulation of transcription, DNA-templated;GO:0008270, zinc ion binding;GO:0009707, chloroplast outer membrane;GO:0016021, integral component of membrane	-
TRINITY_DN49495_c0_g2	157.87	8.1653	4.27308	5.78e-22	5.92e-18	up	smart00389, HOX, Homeodomain. DNA-binding factors that are involved in the transcriptional regulation of key developmental processes. 3.3069e-07	KOG0483, KOG0483, KOG0483, Transcription factor HEX, contains HOX and HALZ domains [Transcription]. 7.76972e-27	gi|224130632|ref|XP_002320889.1| homeobox leucine zipper family protein [Populus trichocarpa] 4.6e-99	gi|566203467|ref|XM_002320853.2| Populus trichocarpa homeobox leucine zipper family protein (POPTR_0014s09860g) mRNA, complete cds 0.0	pfam00046, Homeobox, Homeobox domain. 2.57225e-07	sp|P46897|ATHB7_ARATH Homeobox-leucine zipper protein ATHB-7 OS=Arabidopsis thaliana GN=ATHB-7 PE=1 SV=2 8.10731e-64	tr|B9I924|B9I924_POPTR Predicted protein OS=Populus trichocarpa GN=POPTRDRAFT_572441 PE=3 SV=1 1.9e-99	GO:0003700, transcription factor activity, sequence-specific DNA binding;GO:0005634, nucleus;GO:0006351, transcription, DNA-templated;GO:0009414, response to water deprivation;GO:0009737, response to abscisic acid;GO:0043565, sequence-specific DNA binding;GO:0045893, positive regulation of transcription, DNA-templated	-
TRINITY_DN49928_c0_g1	0.523318	6.51214	-3.63737	1.09e-05	0.000818997	down	-	-	gi|566202013|ref|XP_006374885.1| hypothetical protein POPTR_0014s02400g [Populus trichocarpa] 4.7e-93	gi|566202012|ref|XM_006374823.1| Populus trichocarpa hypothetical protein (POPTR_0014s02400g) mRNA, complete cds 0.0	-	sp|P0C7P8|LHWL1_ARATH Transcription factor EMB1444 OS=Arabidopsis thaliana GN=EMB1444 PE=2 SV=1 4.44459e-09	tr|B9MVV2|B9MVV2_POPTR Predicted protein (Fragment) OS=Populus trichocarpa GN=POPTRDRAFT_287150 PE=4 SV=1 2.8e-79	GO:0003677, DNA binding;GO:0004674, protein serine/threonine kinase activity;GO:0005634, nucleus;GO:0005829, cytosol;GO:0006351, transcription, DNA-templated;GO:0006355, regulation of transcription, DNA-templated;GO:0006468, protein phosphorylation;GO:0035556, intracellular signal transduction;GO:0048364, root development	-
TRINITY_DN51162_c1_g1	35.3397	15.7673	1.16436	0.000474394	0.0145173	up	pfam02701, zf-Dof, Dof domain, zinc finger. The Dof domain is a zinc finger DNA-binding domain, that shows resemblance to the Cys2 zinc finger. 3.49125e-26	-	gi|743937376|ref|XP_011013092.1| PREDICTED: dof zinc finger protein DOF3.1-like [Populus euphratica] 1.3e-102	gi|743937375|ref|XM_011014790.1| PREDICTED: Populus euphratica dof zinc finger protein DOF3.1-like (LOC105117214), mRNA 0.0	pfam02701, zf-Dof, Dof domain, zinc finger. The Dof domain is a zinc finger DNA-binding domain, that shows resemblance to the Cys2 zinc finger. 8.34088e-27	sp|O82155|DOF17_ARATH Dof zinc finger protein DOF1.7 OS=Arabidopsis thaliana GN=DOF1.7 PE=2 SV=1 9.73497e-35	tr|B9MWQ5|B9MWQ5_POPTR F-box family protein OS=Populus trichocarpa GN=POPTRDRAFT_1111104 PE=4 SV=1 1.6e-102	GO:0003677, DNA binding;GO:0003700, transcription factor activity, sequence-specific DNA binding;GO:0005634, nucleus;GO:0006351, transcription, DNA-templated;GO:0006355, regulation of transcription, DNA-templated;GO:0010200, response to chitin;GO:0044212, transcription regulatory region DNA binding;GO:0046872, metal ion binding	-
TRINITY_DN53539_c0_g1	7.6075	29.8033	-1.96998	9.28e-05	0.00435847	down	TIGR00846, Putative_ionic_transporter_y4hA, calcium/proton exchanger. The Ca2+:Cation Antiporter (CaCA) Family (TC 2.A.19)Proteins of the CaCA family are found ubiquitously, having been identified in animals, plants, yeast, archaea and widely divergent bacteria.All of the characterized animal proteins catalyze Ca2+:Na+ exchange although some also transport K+. The NCX1 plasma membrane protein exc…	KOG1397, KOG1397, KOG1397, Ca2+/H+ antiporter VCX1 and related proteins [Inorganic ion transport and metabolism]. 3.42329e-74	gi|743900920|ref|XP_011043767.1| PREDICTED: vacuolar cation/proton exchanger 3-like [Populus euphratica] 2.3e-130	gi|566151004|ref|XM_006369503.1| Populus trichocarpa hypothetical protein (POPTR_0001s25830g) mRNA, complete cds 0.0	-	sp|Q93Z81|CAX3_ARATH Vacuolar cation/proton exchanger 3 OS=Arabidopsis thaliana GN=CAX3 PE=1 SV=1 2.5884e-116	tr|B9GII2|B9GII2_POPTR Ca2+ antiporter/cation exchanger (Fragment) OS=Populus trichocarpa GN=POPTRDRAFT_172311 PE=4 SV=1 8.9e-121	GO:0005773, vacuole;GO:0005774, vacuolar membrane;GO:0006793, phosphorus metabolic process;GO:0006874, cellular calcium ion homeostasis;GO:0006882, cellular zinc ion homeostasis;GO:0009624, response to nematode;GO:0009705, plant-type vacuole membrane;GO:0015369, calcium:proton antiporter activity;GO:0016021, integral component of membrane;GO:0030026, cellular manganese ion homeostasis;GO:0051592,…	-
TRINITY_DN56422_c0_g3	15.2383	45.8358	-1.58877	0.000352879	0.0117112	down	cd05117, STKc_CAMK, The catalytic domain of CAMK family Serine/Threonine Kinases. STKs catalyze the transfer of the gamma-phosphoryl group from ATP to serine/threonine residues on protein substrates. CaMKs are multifunctional calcium and calmodulin (CaM) stimulated STKs involved in cell cycle regulation. There are several types of CaMKs including CaMKI, CaMKII, and CaMKIV. CaMKI proteins are mono…	KOG0032, KOG0032, KOG0032, Ca2+/calmodulin-dependent protein kinase, EF-Hand protein superfamily [Signal transduction mechanisms]. 1.29131e-46	gi|566170819|ref|XP_006383102.1| hypothetical protein POPTR_0005s11560g [Populus trichocarpa] 3.5e-96	gi|566170818|ref|XM_006383040.1| Populus trichocarpa hypothetical protein (POPTR_0005s11560g) mRNA, complete cds 0.0	pfam00069, Pkinase, Protein kinase domain. 1.77836e-16	sp|Q7XJR9|CDPKG_ARATH Calcium-dependent protein kinase 16 OS=Arabidopsis thaliana GN=CPK16 PE=3 SV=1 6.85169e-107	tr|B9MXG0|B9MXG0_POPTR Calcium dependent protein kinase 18 OS=Populus trichocarpa GN=CPK18 PE=4 SV=1 1.5e-96	GO:0004672, protein kinase activity;GO:0004683, calmodulin-dependent protein kinase activity;GO:0005509, calcium ion binding;GO:0005516, calmodulin binding;GO:0005524, ATP binding;GO:0005634, nucleus;GO:0005737, cytoplasm;GO:0005886, plasma membrane;GO:0009738, abscisic acid-activated signaling pathway;GO:0009931, calcium-dependent protein serine/threonine kinase activity;GO:0018105, peptidyl-ser…	-
TRINITY_DN50099_c0_g1	5.00891	15.5887	-1.63794	0.000366884	0.0120608	down	-	-	gi|743836630|ref|XP_011025302.1| PREDICTED: uncharacterized protein LOC105126210 isoform X1 [Populus euphratica] 1.2e-290	gi|743836637|ref|XR_842371.1| PREDICTED: Populus euphratica uncharacterized LOC105126210 (LOC105126210), transcript variant X3, misc_RNA 0.0	-	-	tr|B9GRU3|B9GRU3_POPTR Predicted protein OS=Populus trichocarpa GN=POPTRDRAFT_1072470 PE=4 SV=1 4.1e-269	GO:0016021, integral component of membrane	-
TRINITY_DN40879_c0_g1	2.7185	8.37522	-1.62331	0.00200374	0.0384321	down	cd02989, Phd_like_TxnDC9, Phosducin (Phd)-like family, Thioredoxin (TRX) domain containing protein 9 (TxnDC9) subfamily; composed of predominantly uncharacterized eukaryotic proteins, containing a TRX-like domain without the redox active CXXC motif. The gene name for the human protein is TxnDC9. The two characterized members are described as Phd-like proteins, PLP1 of Saccharomyces cerevisiae and…	KOG1672, KOG1672, KOG1672, ATP binding protein [Posttranslational modification, protein turnover, chaperones, Energy production and conversion]. 6.18954e-39	gi|224094855|ref|XP_002310266.1| hypothetical protein POPTR_0007s13340g [Populus trichocarpa] 1.5e-70	gi|566181100|ref|XM_002310230.2| Populus trichocarpa hypothetical protein (POPTR_0007s13340g) mRNA, complete cds 0.0	-	sp|Q8LCV1|PLP3B_ARATH Thioredoxin domain-containing protein PLP3B OS=Arabidopsis thaliana GN=PLP3B PE=2 SV=1 1.19863e-90	tr|A9PEP1|A9PEP1_POPTR Predicted protein OS=Populus trichocarpa GN=POPTRDRAFT_563201 PE=2 SV=1 6.4e-71	GO:0000280, nuclear division;GO:0000911, cytokinesis by cell plate formation;GO:0005634, nucleus;GO:0005737, cytoplasm;GO:0005874, microtubule;GO:0007000, nucleolus organization;GO:0008616, queuosine biosynthetic process;GO:0043622, cortical microtubule organization;GO:0045454, cell redox homeostasis;GO:0048487, beta-tubulin binding;GO:0051211, anisotropic cell growth	-
TRINITY_DN53353_c0_g1	8.53728	3.68123	1.21359	7.79e-05	0.00378798	up	-	-	gi|224071876|ref|XP_002303587.1| hypothetical protein POPTR_0003s12730g [Populus trichocarpa] 4.2e-158	gi|743826014|ref|XM_011024395.1| PREDICTED: Populus euphratica uncharacterized LOC105124382 (LOC105124382), mRNA 0.0	-	-	tr|B9GWI5|B9GWI5_POPTR Predicted protein OS=Populus trichocarpa GN=POPTRDRAFT_757506 PE=4 SV=1 1.8e-158	-	-
TRINITY_DN53957_c0_g10	0.765679	6.76797	-3.14391	2.29e-05	0.00147037	down	-	-	gi|118484771|gb|ABK94254.1| unknown [Populus trichocarpa] 6.6e-10	gi|160960770|emb|CU228128.1| Populus EST from severe drought-stressed leaves 4.42332e-154	-	-	tr|A9PD01|A9PD01_POPTR Putative uncharacterized protein OS=Populus trichocarpa PE=4 SV=1 2.8e-10	-	-
TRINITY_DN46987_c0_g1	635.947	240.853	1.40075	1.64e-06	0.000180825	up	cd01910, Wali7, This domain is present in Wali7, a protein of unknown function, expressed in wheat and induced by aluminum. Wali7 has a single domain similar to the glutamine amidotransferase domain of glucosamine-fructose 6-phosphate synthase (GLMS or GFAT), glutamine phosphoribosylpyrophosphate (Prpp) amidotransferase (GPATase), asparagine synthetase B (AsnB), beta lactam synthetase (beta-LS) a…	KOG0571, KOG0571, KOG0571, Asparagine synthase (glutamine-hydrolyzing) [Amino acid transport and metabolism]. 1.90342e-06	gi|566185108|ref|XP_002311836.2| hypothetical protein POPTR_0008s20770g [Populus trichocarpa] 2.0e-44	gi|566185107|ref|XM_002311800.2| Populus trichocarpa hypothetical protein (POPTR_0008s20770g) mRNA, complete cds 0.0	pfam12481, DUF3700, Aluminium induced protein. This domain family is found in eukaryotes, and is approximately 120 amino acids in length. There are two conserved sequence motifs: YGL and LRDR. This family is related to GATase enzyme domains. 1.08965e-28	sp|P24805|TSJT1_TOBAC Stem-specific protein TSJT1 OS=Nicotiana tabacum GN=TSJT1 PE=2 SV=1 1.26165e-26	tr|A9PEF3|A9PEF3_POPTR Predicted protein OS=Populus trichocarpa GN=POPTRDRAFT_657667 PE=2 SV=1 1.1e-44	-	-
TRINITY_DN56006_c0_g5	23.5459	10.74	1.13249	2.88e-05	0.00176893	up	-	-	gi|566185675|ref|XP_002313547.2| hypothetical protein POPTR_0009s00960g [Populus trichocarpa] 2.0e-85	gi|566185674|ref|XM_002313511.2| Populus trichocarpa hypothetical protein (POPTR_0009s00960g) mRNA, complete cds 0.0	-	-	tr|B9HQQ2|B9HQQ2_POPTR Predicted protein (Fragment) OS=Populus trichocarpa GN=POPTRDRAFT_204586 PE=4 SV=1 3.0e-70	GO:0003676, nucleic acid binding;GO:0004519, endonuclease activity	-
TRINITY_DN45934_c1_g1	2.81074	11.5241	-2.03563	0.000206236	0.00789747	down	PLN03210, PLN03210, Resistant to P. syringae 6; Provisional. 5.49787e-31	KOG4658, KOG4658, KOG4658, Apoptotic ATPase [Signal transduction mechanisms]. 9.23661e-16	gi|93117599|gb|ABE99702.1| TIR-NBS-LRR disease resistance-like protein [Populus trichocarpa] 1.8e-118	gi|93117600|gb|DQ452617.1| Populus trichocarpa isolate LA-NBS TIR-NBS-LRR disease resistance-like protein mRNA, partial cds 0.0	pfam00931, NB-ARC, NB-ARC domain. 7.92592e-13	sp|Q40392|TMVRN_NICGU TMV resistance protein N OS=Nicotiana glutinosa GN=N PE=1 SV=1 5.32045e-42	tr|Q1KT01|Q1KT01_POPTR TIR-NBS-LRR disease resistance-like protein OS=Populus trichocarpa PE=2 SV=1 7.7e-119	GO:0005524, ATP binding;GO:0005737, cytoplasm;GO:0006952, defense response;GO:0007165, signal transduction;GO:0009626, plant-type hypersensitive response;GO:0043531, ADP binding	-
TRINITY_DN49883_c1_g1	19.742	8.06658	1.29124	0.000867663	0.0220778	up	pfam11250, FAF, Fantastic Four meristem regulator. FAF is a family of plant proteins that regulate the size of the shoot meristem by modulating the CLV3-WUS feedback loop. The proteins are expressed in the centre of the shoot meristem, overlapping with the site of WUS - the homeodomain transcription factor WUSCHEL- expression. FAF proteins are capable of modulating shoot growth by repressing WUS …	-	gi|224125362|ref|XP_002319567.1| hypothetical protein POPTR_0013s02810g [Populus trichocarpa] 4.8e-30	gi|566199075|ref|XM_002319531.2| Populus trichocarpa hypothetical protein (POPTR_0013s02810g) mRNA, complete cds 0.0	pfam11250, FAF, Fantastic Four meristem regulator. FAF is a family of plant proteins that regulate the size of the shoot meristem by modulating the CLV3-WUS feedback loop. The proteins are expressed in the centre of the shoot meristem, overlapping with the site of WUS - the homeodomain transcription factor WUSCHEL- expression. FAF proteins are capable of modulating shoot growth by repressing WUS …	-	tr|B9I7Z7|B9I7Z7_POPTR Predicted protein OS=Populus trichocarpa GN=POPTRDRAFT_570892 PE=4 SV=1 2.0e-30	-	-
TRINITY_DN39630_c0_g2	0.0001	6.23166	-15.9273	7.04e-05	0.00350872	down	cd10233, HSPA1-2_6-8-like_NBD, Nucleotide-binding domain of HSPA1-A, -B, -L, HSPA-2, -6, -7, -8, and similar proteins. This subfamily includes human HSPA1A (70-kDa heat shock protein 1A, also known as HSP72; HSPA1; HSP70I; HSPA1B; HSP70-1; HSP70-1A), HSPA1B (70-kDa heat shock protein 1B, also known as HSPA1A; HSP70-2; HSP70-1B), and HSPA1L (70-kDa heat shock protein 1-like, also known as HSP70T; …	KOG0101, KOG0101, KOG0101, Molecular chaperones HSP70/HSC70, HSP70 superfamily [Posttranslational modification, protein turnover, chaperones]. 1.89465e-28	gi|475593978|gb|EMT22558.1| Heat shock cognate 70 kDa protein 2 [Aegilops tauschii] 4.2e-24	gi|566182505|ref|XM_002312055.2| Populus trichocarpa heat shock protein 70 cognate (POPTR_0008s05490g) mRNA, complete cds 1.44159e-86	pfam00012, HSP70, Hsp70 protein. Hsp70 chaperones help to fold many proteins. Hsp70 assisted folding involves repeated cycles of substrate binding and release. Hsp70 activity is ATP dependent. Hsp70 proteins are made up of two regions: the amino terminus is the ATPase domain and the carboxyl terminus is the substrate binding region. 6.63338e-10	sp|P09189|HSP7C_PETHY Heat shock cognate 70 kDa protein OS=Petunia hybrida GN=HSP70 PE=2 SV=1 6.6653e-33	tr|M8BL59|M8BL59_AEGTA Heat shock cognate 70 kDa protein 2 OS=Aegilops tauschii GN=F775_12770 PE=4 SV=1 1.8e-24	GO:0005524, ATP binding	-
TRINITY_DN53913_c1_g3	3.54016	206.713	-5.86767	1.46e-06	0.000163083	down	-	-	gi|566199597|ref|XP_002319690.2| hypothetical protein POPTR_0013s05400g, partial [Populus trichocarpa] 7.4e-14	gi|118481298|gb|EF144349.1| Populus trichocarpa clone PX0015_O12 unknown mRNA 0.0	-	-	-	-	-
TRINITY_DN46938_c1_g3	65.4374	14.407	2.18334	2.07e-07	3.3e-05	up	-	-	gi|224088728|ref|XP_002308520.1| MTD1 family protein [Populus trichocarpa] 3.6e-67	gi|566177793|ref|XM_002308484.2| Populus trichocarpa MTD1 family protein (POPTR_0006s23640g) mRNA, complete cds 0.0	-	-	tr|A9PBN9|A9PBN9_POPTR Predicted protein OS=Populus trichocarpa GN=POPTRDRAFT_561575 PE=2 SV=1 1.5e-67	-	-
TRINITY_DN46938_c1_g1	65.2519	8.7551	2.89782	5.58e-14	7.02e-11	up	-	-	gi|566214856|ref|XP_002324201.2| MTD1 family protein [Populus trichocarpa] 3.9e-85	gi|566214855|ref|XM_002324165.2| Populus trichocarpa MTD1 family protein (POPTR_0018s08410g) mRNA, complete cds 0.0	-	-	tr|B9IKE9|B9IKE9_POPTR Predicted protein OS=Populus trichocarpa GN=POPTRDRAFT_578015 PE=4 SV=1 2.5e-78	-	-
TRINITY_DN56047_c0_g2	0.937811	6.1603	-2.71563	1.01e-06	0.000122916	down	TIGR01517, ATPase-IIB_Ca, plasma-membrane calcium-translocating P-type ATPase. This model describes the P-type ATPase responsible for translocating calcium ions across the plasma membrane of eukaryotes, out of the cell. In some organisms, this type of pump may also be found in vacuolar membranes. In humans and mice, at least, there are multiple isoforms of the PMCA pump with overlapping but not r…	KOG0204, KOG0204, KOG0204, Calcium transporting ATPase [Inorganic ion transport and metabolism]. 4.92666e-170	gi|566189899|ref|XP_002314662.2| hypothetical protein POPTR_0010s09130g [Populus trichocarpa] 1.8e-254	gi|566189898|ref|XM_002314626.2| Populus trichocarpa hypothetical protein (POPTR_0010s09130g) mRNA, complete cds 0.0	pfam00689, Cation_ATPase_C, Cation transporting ATPase, C-terminus. Members of this families are involved in Na+/K+, H+/K+, Ca++ and Mg++ transport. This family represents 5 transmembrane helices. 1.18041e-16	sp|Q9LIK7|ACA13_ARATH Putative calcium-transporting ATPase 13, plasma membrane-type OS=Arabidopsis thaliana GN=ACA13 PE=3 SV=1 0.0	tr|B9HUQ4|B9HUQ4_POPTR Autoinhibited calcium ATPase OS=Populus trichocarpa GN=POPTRDRAFT_566178 PE=3 SV=1 7.8e-255	GO:0005388, calcium-transporting ATPase activity;GO:0005524, ATP binding;GO:0005887, integral component of plasma membrane;GO:0043231, intracellular membrane-bounded organelle;GO:0046872, metal ion binding	-
TRINITY_DN57118_c0_g2	11.5489	32.7006	-1.50156	0.00148831	0.0321481	down	cd14111, STKc_SPEG_rpt2, Catalytic kinase domain, second repeat, of Giant Serine/Threonine Kinase Striated muscle preferentially expressed protein kinase. STKs catalyze the transfer of the gamma-phosphoryl group from ATP to serine/threonine residues on protein substrates. The Striated muscle preferentially expressed gene (SPEG) generates 4 different isoforms through alternative promoter use and s…	KOG0032, KOG0032, KOG0032, Ca2+/calmodulin-dependent protein kinase, EF-Hand protein superfamily [Signal transduction mechanisms]. 6.63617e-15	gi|743848226|ref|XP_011028179.1| PREDICTED: transcription factor MYC2-like [Populus euphratica] 1.2e-134	gi|743848225|ref|XM_011029877.1| PREDICTED: Populus euphratica transcription factor MYC2-like (LOC105128283), mRNA 0.0	pfam14215, bHLH-MYC_N, bHLH-MYC and R2R3-MYB transcription factors N-terminal. This is the N-terminal region of a family of MYB and MYC transcription factors. The DNA-binding HLH domain is further downstream, pfam00010. Members of the MYB and MYC family regulate the biosynthesis of phenylpropanoids in several plant species (DOI:10.1007/s11295-009-0232-y). 1.47328e-16	sp|Q62407|SPEG_MOUSE Striated muscle-specific serine/threonine-protein kinase OS=Mus musculus GN=Speg PE=1 SV=2 2.71646e-94	tr|B9N2M7|B9N2M7_POPTR Predicted protein OS=Populus trichocarpa GN=POPTRDRAFT_836925 PE=4 SV=1 1.1e-123	GO:0001701, in utero embryonic development;GO:0004674, protein serine/threonine kinase activity;GO:0005524, ATP binding;GO:0005634, nucleus;GO:0055013, cardiac muscle cell development;GO:0060541, respiratory system development;GO:0072358, cardiovascular system development	K13422-ko04016 MAPK signaling pathway - plant;ko04075 Plant hormone signal transduction
TRINITY_DN46171_c0_g1	5.99138	1.23882	2.27393	0.000164536	0.0067215	up	TIGR02189, glutaredoxin-like_protein, Glutaredoxin-like family. This family of glutaredoxin-like proteins is aparrently limited to plants. Multiple isoforms are found in A. thaliana and O.sativa. 4.84229e-17	KOG1752, KOG1752, KOG1752, Glutaredoxin and related proteins [Posttranslational modification, protein turnover, chaperones]. 5.82007e-13	gi|566193959|ref|XP_006377423.1| glutaredoxin-like family protein [Populus trichocarpa] 1.9e-62	gi|743914573|ref|XM_011002916.1| PREDICTED: Populus euphratica glutaredoxin-C9-like (LOC105108569), mRNA 0.0	-	sp|Q9SGP6|GRXC9_ARATH Glutaredoxin-C9 OS=Arabidopsis thaliana GN=GRXC9 PE=1 SV=1 4.4318e-25	tr|B9N9K4|B9N9K4_POPTR Glutaredoxin C9 OS=Populus trichocarpa GN=PtrcGrx_C9 PE=4 SV=1 8.2e-63	GO:0005623, cell;GO:0005634, nucleus;GO:0005737, cytoplasm;GO:0009055, electron carrier activity;GO:0009751, response to salicylic acid;GO:0009863, salicylic acid mediated signaling pathway;GO:0009867, jasmonic acid mediated signaling pathway;GO:0015035, protein disulfide oxidoreductase activity;GO:0045454, cell redox homeostasis	-
TRINITY_DN46171_c0_g2	9.4339	1.82888	2.36689	8.21e-06	0.000658596	up	TIGR02189, glutaredoxin-like_protein, Glutaredoxin-like family. This family of glutaredoxin-like proteins is aparrently limited to plants. Multiple isoforms are found in A. thaliana and O.sativa. 8.88986e-10	KOG1752, KOG1752, KOG1752, Glutaredoxin and related proteins [Posttranslational modification, protein turnover, chaperones]. 1.0948e-11	gi|743846531|ref|XP_011027761.1| PREDICTED: glutaredoxin-C9 [Populus euphratica] 1.6e-64	gi|743846530|ref|XM_011029459.1| PREDICTED: Populus euphratica glutaredoxin-C9 (LOC105127976), mRNA 0.0	-	sp|Q9SGP6|GRXC9_ARATH Glutaredoxin-C9 OS=Arabidopsis thaliana GN=GRXC9 PE=1 SV=1 2.00143e-18	tr|B9H2P7|B9H2P7_POPTR Glutaredoxin OS=Populus trichocarpa GN=PtrGrx4 PE=4 SV=1 1.9e-59	GO:0005623, cell;GO:0005634, nucleus;GO:0005737, cytoplasm;GO:0009055, electron carrier activity;GO:0009751, response to salicylic acid;GO:0009863, salicylic acid mediated signaling pathway;GO:0009867, jasmonic acid mediated signaling pathway;GO:0015035, protein disulfide oxidoreductase activity;GO:0045454, cell redox homeostasis	-
TRINITY_DN54905_c0_g1	10.5807	32.5621	-1.62176	0.00192515	0.0375716	down	pfam10225, DUF2215, Uncharacterized conserved protein (DUF2215). This entry is the central 200 residues of a family of proteins conserved from worms to humans. The function is unknown. 8.11018e-11	-	gi|224123884|ref|XP_002319188.1| hypothetical protein POPTR_0013s06100g [Populus trichocarpa] 8.3e-134	gi|566199714|ref|XM_002319152.2| Populus trichocarpa hypothetical protein (POPTR_0013s06100g) mRNA, complete cds 0.0	pfam10225, DUF2215, Uncharacterized conserved protein (DUF2215). This entry is the central 200 residues of a family of proteins conserved from worms to humans. The function is unknown. 1.93759e-11	-	tr|B9I633|B9I633_POPTR Predicted protein OS=Populus trichocarpa GN=POPTRDRAFT_730053 PE=4 SV=1 3.5e-134	GO:0016021, integral component of membrane	-
TRINITY_DN47059_c2_g6	0.059659	22.6137	-8.56624	1.69e-08	4.08e-06	down	cd06472, ACD_ScHsp26_like, Alpha crystallin domain (ACD) found in Saccharomyces cerevisiae (Sc) small heat shock protein (Hsp)26 and similar proteins. sHsps are molecular chaperones that suppress protein aggregation and protect against cell stress, and are generally active as large oligomers consisting of multiple subunits. ScHsp26 is temperature-regulated, it switches from an inactive to a chape…	KOG0710, KOG0710, KOG0710, Molecular chaperone (small heat-shock protein Hsp26/Hsp42) [Posttranslational modification, protein turnover, chaperones]. 2.1248e-26	gi|566188074|ref|XP_002312898.2| hypothetical protein POPTR_0009s15020g [Populus trichocarpa] 1.2e-62	gi|743792464|ref|XM_011046271.1| PREDICTED: Populus euphratica 18.1 kDa class I heat shock protein-like (LOC105139713), mRNA 0.0	pfam00011, HSP20, Hsp20/alpha crystallin family. Not only do small heat-shock-proteins occur in eukaryotes and prokaryotes but they have also now been shown to occur in cyanobacterial phages as well as their bacterial hosts. 5.87721e-14	sp|P02519|HSP11_SOYBN 17.3 kDa class I heat shock protein OS=Glycine max GN=HSP17.3-B PE=3 SV=1 1.01439e-65	tr|B9HQU3|B9HQU3_POPTR Predicted protein OS=Populus trichocarpa GN=POPTRDRAFT_721475 PE=3 SV=1 2.9e-63	GO:0005737, cytoplasm	K13993-ko04141 Protein processing in endoplasmic reticulum
TRINITY_DN47059_c2_g1	50.3098	211.255	-2.07008	0.000151413	0.00633656	down	cd06472, ACD_ScHsp26_like, Alpha crystallin domain (ACD) found in Saccharomyces cerevisiae (Sc) small heat shock protein (Hsp)26 and similar proteins. sHsps are molecular chaperones that suppress protein aggregation and protect against cell stress, and are generally active as large oligomers consisting of multiple subunits. ScHsp26 is temperature-regulated, it switches from an inactive to a chape…	KOG0710, KOG0710, KOG0710, Molecular chaperone (small heat-shock protein Hsp26/Hsp42) [Posttranslational modification, protein turnover, chaperones]. 8.23232e-34	gi|224104357|ref|XP_002313410.1| hypothetical protein POPTR_0009s04410g [Populus trichocarpa] 1.2e-72	gi|566186252|ref|XM_002313374.2| Populus trichocarpa hypothetical protein (POPTR_0009s04410g) mRNA, complete cds 0.0	pfam00011, HSP20, Hsp20/alpha crystallin family. Not only do small heat-shock-proteins occur in eukaryotes and prokaryotes but they have also now been shown to occur in cyanobacterial phages as well as their bacterial hosts. 2.01823e-23	sp|P04794|HSP14_SOYBN 17.5 kDa class I heat shock protein OS=Glycine max GN=HSP17.5-E PE=3 SV=1 3.69478e-83	tr|B9HPA6|B9HPA6_POPTR Predicted protein OS=Populus trichocarpa GN=POPTRDRAFT_723183 PE=3 SV=1 4.8e-73	GO:0005737, cytoplasm	K13993-ko04141 Protein processing in endoplasmic reticulum
TRINITY_DN54739_c1_g3	0.43074	5.08986	-3.56274	0.000269886	0.00966084	down	-	-	gi|566209356|ref|XP_006373856.1| hypothetical protein POPTR_0016s08470g [Populus trichocarpa] 1.6e-15	gi|566209355|ref|XM_006373794.1| Populus trichocarpa hypothetical protein (POPTR_0016s08470g) mRNA, complete cds 0.0	-	sp|Q8H0W3|RVE6_ARATH Protein REVEILLE 6 OS=Arabidopsis thaliana GN=RVE6 PE=2 SV=1 4.32269e-06	tr|I1NA52|I1NA52_SOYBN Uncharacterized protein OS=Glycine max PE=4 SV=2 5.6e-10	GO:0003677, DNA binding;GO:0003700, transcription factor activity, sequence-specific DNA binding;GO:0005634, nucleus;GO:0006351, transcription, DNA-templated;GO:0006355, regulation of transcription, DNA-templated;GO:0009651, response to salt stress;GO:0009723, response to ethylene;GO:0009737, response to abscisic acid;GO:0009739, response to gibberellin;GO:0009751, response to salicylic acid;GO:0…	-
TRINITY_DN57286_c0_g1	59.3188	29.2375	1.02067	0.000505796	0.0152309	up	TIGR01377, Monomeric_sarcosine_oxidase, sarcosine oxidase, monomeric form. Sarcosine oxidase catalyzes the oxidative demethylation of sarcosine to glycine. The reaction converts tetrahydrofolate to 5,10-methylene-tetrahydrofolate. The enzyme is known in monomeric and heterotetrameric (alpha,beta,gamma,delta) forms [Energy metabolism, Amino acids and amines]. 5.38468e-89	KOG2820, KOG2820, KOG2820, FAD-dependent oxidoreductase [General function prediction only]. 3.5814e-66	gi|224142069|ref|XP_002324381.1| putative sarcosine oxidase family protein [Populus trichocarpa] 8.0e-222	gi|566214017|ref|XM_002324910.2| Populus trichocarpa hypothetical protein (POPTR_0018s03440g) mRNA, complete cds 0.0	-	sp|Q9SJA7|SOX_ARATH Probable sarcosine oxidase OS=Arabidopsis thaliana GN=At2g24580 PE=2 SV=1 0.0	tr|B9ILE2|B9ILE2_POPTR Sarcosine oxidase OS=Populus trichocarpa GN=SOX1 PE=4 SV=1 3.3e-222	GO:0008115, sarcosine oxidase activity;GO:0046653, tetrahydrofolate metabolic process	K00306-ko00310 Lysine degradation;ko04146 Peroxisome;ko00260 Glycine, serine and threonine metabolism
TRINITY_DN54780_c0_g3	6.12218	19.4232	-1.66566	0.00240345	0.0436091	down	-	KOG0698, KOG0698, KOG0698, Serine/threonine protein phosphatase [Signal transduction mechanisms]. 7.67234e-06	gi|743883037|ref|XP_011036918.1| PREDICTED: probable protein phosphatase 2C 5 isoform X2 [Populus euphratica] 5.0e-68	gi|743883036|ref|XM_011038616.1| PREDICTED: Populus euphratica probable protein phosphatase 2C 5 (LOC105134268), transcript variant X2, mRNA 0.0	-	sp|O80492|P2C05_ARATH Probable protein phosphatase 2C 5 OS=Arabidopsis thaliana GN=At1g09160 PE=2 SV=1 1.25407e-68	tr|B9N4N0|B9N4N0_POPTR Predicted protein OS=Populus trichocarpa GN=POPTRDRAFT_784817 PE=4 SV=1 1.8e-67	GO:0004722, protein serine/threonine phosphatase activity;GO:0005886, plasma membrane;GO:0046872, metal ion binding	-
TRINITY_DN49173_c0_g3	1.64402	8.39847	-2.3529	4e-06	0.000372637	down	cd14664, STK_BAK1_like, Catalytic domain of the Serine/Threonine Kinase, BRI1 associated kinase 1 and related STKs. STKs catalyze the transfer of the gamma-phosphoryl group from ATP to serine/threonine residues on protein substrates. This subfamily includes three leucine-rich repeat receptor-like kinases (LRR-RLKs): Arabidopsis thaliana BAK1 and CLAVATA1 (CLV1), and Physcomitrella patens CLL1B cl…	KOG1187, KOG1187, KOG1187, Serine/threonine protein kinase [Signal transduction mechanisms]. 1.11691e-100	gi|743786947|ref|XP_011029604.1| PREDICTED: probable serine/threonine-protein kinase At1g01540 [Populus euphratica] 2.2e-272	gi|743786946|ref|XM_011031302.1| PREDICTED: Populus euphratica probable serine/threonine-protein kinase At1g01540 (LOC105129309), mRNA 0.0	pfam07714, Pkinase_Tyr, Protein tyrosine kinase. 1.58977e-21	sp|Q3EDL4|Y1154_ARATH Probable serine/threonine-protein kinase At1g01540 OS=Arabidopsis thaliana GN=At1g01540 PE=1 SV=2 0.0	tr|B9MVT3|B9MVT3_POPTR Predicted protein OS=Populus trichocarpa GN=POPTRDRAFT_918496 PE=3 SV=1 3.0e-239	GO:0004674, protein serine/threonine kinase activity;GO:0005524, ATP binding;GO:0005886, plasma membrane;GO:0016021, integral component of membrane;GO:0046777, protein autophosphorylation	-
TRINITY_DN49059_c0_g5	1.78953	6.32703	-1.82195	0.000970068	0.0237997	down	-	-	gi|566199191|ref|XP_006375802.1| hypothetical protein POPTR_0013s033601g, partial [Populus trichocarpa] 4.4e-61	gi|158534097|gb|AC213081.1| Populus trichocarpa clone POP002-D20, complete sequence 0.0	-	sp|Q9ZVN2|Y1457_ARATH Acyltransferase-like protein At1g54570, chloroplastic OS=Arabidopsis thaliana GN=At1g54570 PE=2 SV=1 3.87333e-17	tr|B9MZJ7|B9MZJ7_POPTR Predicted protein OS=Populus trichocarpa GN=POPTRDRAFT_1112711 PE=4 SV=1 6.4e-30	GO:0004144, diacylglycerol O-acyltransferase activity;GO:0009507, chloroplast;GO:0010287, plastoglobule;GO:0019432, triglyceride biosynthetic process;GO:0033306, phytol metabolic process	-
TRINITY_DN50202_c0_g2	169.303	915.417	-2.43482	3.15e-06	0.00030812	down	pfam04674, Phi_1, Phosphate-induced protein 1 conserved region. Family of conserved plant proteins. Conserved region identified in a phosphate-induced protein of unknown function. 1.9489e-107	-	gi|743802128|ref|XP_011016663.1| PREDICTED: protein EXORDIUM-like [Populus euphratica] 2.6e-180	gi|743802127|ref|XM_011018361.1| PREDICTED: Populus euphratica protein EXORDIUM-like (LOC105120168), mRNA 0.0	pfam04674, Phi_1, Phosphate-induced protein 1 conserved region. Family of conserved plant proteins. Conserved region identified in a phosphate-induced protein of unknown function. 4.65609e-108	sp|Q9ZPE7|EXO_ARATH Protein EXORDIUM OS=Arabidopsis thaliana GN=EXO PE=2 SV=1 7.0871e-150	tr|B9P856|B9P856_POPTR Predicted protein OS=Populus trichocarpa GN=POPTRDRAFT_680592 PE=4 SV=1 1.3e-157	GO:0005615, extracellular space;GO:0005618, cell wall;GO:0005794, Golgi apparatus;GO:0009505, plant-type cell wall;GO:0009741, response to brassinosteroid;GO:0048046, apoplast	-
TRINITY_DN50202_c0_g3	25.3157	224.268	-3.14712	2.64e-14	3.65e-11	down	pfam04674, Phi_1, Phosphate-induced protein 1 conserved region. Family of conserved plant proteins. Conserved region identified in a phosphate-induced protein of unknown function. 1.97191e-101	-	gi|118483881|gb|ABK93831.1| unknown [Populus trichocarpa] 1.8e-160	gi|566157184|ref|XM_002301026.2| Populus trichocarpa phosphate-responsive family protein (POPTR_0002s09880g) mRNA, complete cds 0.0	pfam04674, Phi_1, Phosphate-induced protein 1 conserved region. Family of conserved plant proteins. Conserved region identified in a phosphate-induced protein of unknown function. 4.71105e-102	sp|Q9ZPE7|EXO_ARATH Protein EXORDIUM OS=Arabidopsis thaliana GN=EXO PE=2 SV=1 2.80819e-137	tr|A9PBS8|A9PBS8_POPTR Putative uncharacterized protein OS=Populus trichocarpa PE=2 SV=1 7.7e-161	GO:0005615, extracellular space;GO:0005618, cell wall;GO:0005794, Golgi apparatus;GO:0009505, plant-type cell wall;GO:0009741, response to brassinosteroid;GO:0048046, apoplast	-
TRINITY_DN50202_c0_g1	110.079	814.715	-2.88775	8.09e-09	2.14e-06	down	pfam04674, Phi_1, Phosphate-induced protein 1 conserved region. Family of conserved plant proteins. Conserved region identified in a phosphate-induced protein of unknown function. 2.31075e-53	-	gi|566254771|ref|XP_006387583.1| hypothetical protein POPTR_0815s00210g [Populus trichocarpa] 4.3e-120	gi|157365031|gb|AC210380.1| Populus trichocarpa clone ACSB2121-B05, complete sequence 0.0	pfam04674, Phi_1, Phosphate-induced protein 1 conserved region. Family of conserved plant proteins. Conserved region identified in a phosphate-induced protein of unknown function. 5.52057e-54	sp|Q9ZPE7|EXO_ARATH Protein EXORDIUM OS=Arabidopsis thaliana GN=EXO PE=2 SV=1 2.55875e-88	tr|B9P856|B9P856_POPTR Predicted protein OS=Populus trichocarpa GN=POPTRDRAFT_680592 PE=4 SV=1 1.2e-111	GO:0005615, extracellular space;GO:0005618, cell wall;GO:0005794, Golgi apparatus;GO:0009505, plant-type cell wall;GO:0009741, response to brassinosteroid;GO:0048046, apoplast	-
TRINITY_DN43277_c0_g1	16.3713	7.29852	1.16549	9.2e-05	0.00434067	up	pfam13639, zf-RING_2, Ring finger domain. 7.05399e-12	KOG4628, KOG4628, KOG4628, Predicted E3 ubiquitin ligase [Posttranslational modification, protein turnover, chaperones]. 5.03396e-14	gi|566245618|ref|XP_002326072.2| hypothetical protein POPTR_0019s15050g, partial [Populus trichocarpa] 1.1e-92	gi|743897012|ref|XM_011043484.1| PREDICTED: Populus euphratica RING-H2 finger protein ATL74-like (LOC105137662), mRNA 0.0	pfam13639, zf-RING_2, Ring finger domain. 1.68526e-12	sp|Q9SG96|ATL72_ARATH RING-H2 finger protein ATL72 OS=Arabidopsis thaliana GN=ATL72 PE=2 SV=1 1.51651e-33	tr|B9INM0|B9INM0_POPTR Predicted protein OS=Populus trichocarpa GN=POPTRDRAFT_574478 PE=4 SV=1 4.2e-94	GO:0008270, zinc ion binding;GO:0016021, integral component of membrane;GO:0016567, protein ubiquitination	-
TRINITY_DN48603_c0_g1	6.13058	32.274	-2.39628	2.76e-06	0.000277656	down	pfam01582, TIR, TIR domain. The Toll/interleukin-1 receptor (TIR) homology domain is an intracellular signalling domain found in MyD88, interleukin 1 receptor and the Toll receptor. It contains three highly-conserved regions, and mediates protein-protein interactions between the Toll-like receptors (TLRs) and signal-transduction components. TIR-like motifs are also found in plant proteins thought…	-	gi|566160398|ref|XP_006385250.1| hypothetical protein POPTR_0003s02110g [Populus trichocarpa] 7.4e-33	gi|566221573|ref|XM_002325237.2| Populus trichocarpa hypothetical protein (POPTR_0019s01200g) mRNA, complete cds 0.0	pfam01582, TIR, TIR domain. The Toll/interleukin-1 receptor (TIR) homology domain is an intracellular signalling domain found in MyD88, interleukin 1 receptor and the Toll receptor. It contains three highly-conserved regions, and mediates protein-protein interactions between the Toll-like receptors (TLRs) and signal-transduction components. TIR-like motifs are also found in plant proteins thought…	sp|Q40392|TMVRN_NICGU TMV resistance protein N OS=Nicotiana glutinosa GN=N PE=1 SV=1 1.62901e-07	tr|B9N2G5|B9N2G5_POPTR Nls-tir-nbs-lrr resistance protein (Fragment) OS=Populus trichocarpa GN=POPTRDRAFT_264269 PE=4 SV=1 1.1e-33	GO:0005524, ATP binding;GO:0005737, cytoplasm;GO:0007165, signal transduction;GO:0009626, plant-type hypersensitive response;GO:0043531, ADP binding	-
TRINITY_DN56796_c0_g4	5.08292	19.3564	-1.92908	0.000205182	0.00788849	down	-	-	gi|743879396|ref|XP_011035921.1| PREDICTED: omega-3 fatty acid desaturase, chloroplastic-like [Populus euphratica] 5.3e-07	gi|566191669|ref|XM_002315118.2| Populus trichocarpa hypothetical protein (POPTR_0010s19510g) mRNA, complete cds 0.0	-	-	tr|B9HSM8|B9HSM8_POPTR Predicted protein OS=Populus trichocarpa GN=POPTRDRAFT_724446 PE=4 SV=1 2.2e-07	GO:0006629, lipid metabolic process;GO:0016021, integral component of membrane;GO:0016717, oxidoreductase activity, acting on paired donors, with oxidation of a pair of donors resulting in the reduction of molecular oxygen to two molecules of water	-
TRINITY_DN56796_c0_g2	31.0327	112.317	-1.85572	6.88e-06	0.000571803	down	PLN02498, PLN02498, omega-3 fatty acid desaturase. 2.8966e-94	-	gi|566182746|ref|XP_002312163.2| chloroplast omega-3 desaturase family protein [Populus trichocarpa] 3.5e-69	gi|566182745|ref|XM_002312127.2| Populus trichocarpa chloroplast omega-3 desaturase family protein (POPTR_0008s06960g) mRNA, complete cds 0.0	-	sp|P48619|FAD3C_RICCO Omega-3 fatty acid desaturase, chloroplastic OS=Ricinus communis GN=FAD7A-1 PE=2 SV=1 4.12524e-89	tr|B9HHQ8|B9HHQ8_POPTR Predicted protein OS=Populus trichocarpa GN=POPTRDRAFT_820418 PE=4 SV=1 2.1e-68	GO:0006629, lipid metabolic process;GO:0006636, unsaturated fatty acid biosynthetic process;GO:0016021, integral component of membrane;GO:0016717, oxidoreductase activity, acting on paired donors, with oxidation of a pair of donors resulting in the reduction of molecular oxygen to two molecules of water;GO:0031969, chloroplast membrane	-
TRINITY_DN56796_c0_g1	7.39884	35.6008	-2.26654	4.11e-06	0.000379261	down	PLN02498, PLN02498, omega-3 fatty acid desaturase. 1.25749e-78	-	gi|566191670|ref|XP_002315154.2| hypothetical protein POPTR_0010s19510g [Populus trichocarpa] 7.9e-69	gi|743879395|ref|XM_011037619.1| PREDICTED: Populus euphratica omega-3 fatty acid desaturase, chloroplastic-like (LOC105133573), mRNA 0.0	-	sp|P48619|FAD3C_RICCO Omega-3 fatty acid desaturase, chloroplastic OS=Ricinus communis GN=FAD7A-1 PE=2 SV=1 2.91056e-73	tr|B9HSM8|B9HSM8_POPTR Predicted protein OS=Populus trichocarpa GN=POPTRDRAFT_724446 PE=4 SV=1 3.3e-69	GO:0006629, lipid metabolic process;GO:0006636, unsaturated fatty acid biosynthetic process;GO:0016021, integral component of membrane;GO:0016717, oxidoreductase activity, acting on paired donors, with oxidation of a pair of donors resulting in the reduction of molecular oxygen to two molecules of water;GO:0031969, chloroplast membrane	-
TRINITY_DN52696_c0_g1	1.92864	17.4438	-3.17706	8.01e-11	3.94e-08	down	-	-	gi|224112641|ref|XP_002316248.1| hypothetical protein POPTR_0010s20310g [Populus trichocarpa] 2.4e-206	gi|566191816|ref|XM_002316212.2| Populus trichocarpa hypothetical protein (POPTR_0010s20310g) mRNA, complete cds 0.0	-	-	tr|B9HT34|B9HT34_POPTR Predicted protein OS=Populus trichocarpa GN=POPTRDRAFT_822434 PE=4 SV=1 1.0e-206	-	-
TRINITY_DN49668_c0_g1	81.5653	22.2434	1.87458	1.8e-08	4.29e-06	up	-	-	-	gi|566170665|ref|XM_006382964.1| Populus trichocarpa hypothetical protein (POPTR_0005s10850g) mRNA, complete cds 0.0	-	sp|P27626|DIN1_RAPSA Senescence-associated protein DIN1 OS=Raphanus sativus GN=DIN1 PE=2 SV=1 6.61946e-07	-	-	-
TRINITY_DN49668_c0_g2	103.222	27.8488	1.89006	3.92e-08	8.18e-06	up	-	-	gi|566170666|ref|XP_006383026.1| hypothetical protein POPTR_0005s10850g [Populus trichocarpa] 4.5e-44	gi|566170665|ref|XM_006382964.1| Populus trichocarpa hypothetical protein (POPTR_0005s10850g) mRNA, complete cds 3.6012e-143	-	-	tr|B9MX96|B9MX96_POPTR Predicted protein OS=Populus trichocarpa GN=POPTRDRAFT_827023 PE=4 SV=1 1.4e-07	-	-
TRINITY_DN58091_c5_g1	9.46748	4.4618	1.08536	0.000427754	0.0135052	up	pfam13639, zf-RING_2, Ring finger domain. 1.10048e-06	KOG4628, KOG4628, KOG4628, Predicted E3 ubiquitin ligase [Posttranslational modification, protein turnover, chaperones]. 5.24605e-07	gi|566211820|ref|XP_006372962.1| hypothetical protein POPTR_0017s06590g [Populus trichocarpa] 6.7e-108	gi|743883340|ref|XM_011038703.1| PREDICTED: Populus euphratica uncharacterized LOC105134334 (LOC105134334), mRNA 0.0	pfam13639, zf-RING_2, Ring finger domain. 2.62915e-07	sp|Q6GPV5|RN181_XENLA E3 ubiquitin-protein ligase RNF181 OS=Xenopus laevis GN=rnf181 PE=2 SV=1 8.40222e-11	tr|B9MXX4|B9MXX4_POPTR Predicted protein OS=Populus trichocarpa GN=POPTRDRAFT_782177 PE=2 SV=1 2.8e-108	GO:0000209, protein polyubiquitination;GO:0008270, zinc ion binding;GO:0016567, protein ubiquitination;GO:0016874, ligase activity;GO:0042787, protein ubiquitination involved in ubiquitin-dependent protein catabolic process;GO:0043161, proteasome-mediated ubiquitin-dependent protein catabolic process;GO:0061630, ubiquitin protein ligase activity	-
TRINITY_DN56075_c0_g1	316.625	147.678	1.10032	7.89e-07	0.000101136	up	PLN02258, PLN02258, 9-cis-epoxycarotenoid dioxygenase NCED. 7.19808e-120	KOG1285, KOG1285, KOG1285, Beta, beta-carotene 15,15'-dioxygenase and related enzymes [Secondary metabolites biosynthesis, transport and catabolism]. 2.32634e-80	gi|566242108|ref|XP_002326037.2| hypothetical protein POPTR_0019s12320g [Populus trichocarpa] 0.0e+00	gi|566242107|ref|XM_002326001.2| Populus trichocarpa hypothetical protein (POPTR_0019s12320g) mRNA, complete cds 0.0	pfam03055, RPE65, Retinal pigment epithelial membrane protein. This family represents a retinal pigment epithelial membrane receptor which is abundantly expressed in retinal pigment epithelium, and binds plasma retinal binding protein. The family also includes the sequence related neoxanthin cleavage enzyme in plants and lignostilbene-alpha,beta-dioxygenase in bacteria. 4.35884e-76	sp|O49675|CCD4_ARATH Probable carotenoid cleavage dioxygenase 4, chloroplastic OS=Arabidopsis thaliana GN=CCD4 PE=1 SV=1 0.0	tr|B9IQS5|B9IQS5_POPTR Predicted protein OS=Populus trichocarpa GN=POPTRDRAFT_913328 PE=2 SV=1 0.0e+00	GO:0009507, chloroplast;GO:0010287, plastoglobule;GO:0016702, oxidoreductase activity, acting on single donors with incorporation of molecular oxygen, incorporation of two atoms of oxygen;GO:0046872, metal ion binding	K09840-ko00906 Carotenoid biosynthesis
TRINITY_DN55834_c1_g1	63.3959	15.0575	2.0739	4.02e-10	1.62e-07	up	-	-	gi|566159845|ref|XP_002303068.2| hypothetical protein POPTR_0002s24910g [Populus trichocarpa] 1.7e-207	gi|566159844|ref|XM_002303032.2| Populus trichocarpa hypothetical protein (POPTR_0002s24910g) mRNA, complete cds 0.0	-	sp|Q9LVJ0|UVB31_ARATH UV-B-induced protein At3g17800, chloroplastic OS=Arabidopsis thaliana GN=At3g17800 PE=2 SV=1 9.33871e-53	tr|B9GQN1|B9GQN1_POPTR Predicted protein OS=Populus trichocarpa GN=POPTRDRAFT_553215 PE=4 SV=1 7.0e-147	GO:0009507, chloroplast;GO:0009611, response to wounding;GO:0010193, response to ozone;GO:0010224, response to UV-B	-
TRINITY_DN56624_c1_g4	8.86166	3.11718	1.50734	3.92e-05	0.00224884	up	cd14066, STKc_IRAK, Catalytic domain of the Serine/Threonine kinases, Interleukin-1 Receptor Associated Kinases and related STKs. STKs catalyze the transfer of the gamma-phosphoryl group from ATP to serine/threonine residues on protein substrates. IRAKs are involved in Toll-like receptor (TLR) and interleukin-1 (IL-1) signalling pathways, and are thus critical in regulating innate immune response…	KOG1187, KOG1187, KOG1187, Serine/threonine protein kinase [Signal transduction mechanisms]. 2.8405e-46	gi|743900196|ref|XP_011043389.1| PREDICTED: L-type lectin-domain containing receptor kinase VII.1-like isoform X2 [Populus euphratica] 2.9e-100	gi|743900195|ref|XM_011045087.1| PREDICTED: Populus euphratica L-type lectin-domain containing receptor kinase VII.1-like (LOC105138871), transcript variant X2, mRNA 0.0	pfam00069, Pkinase, Protein kinase domain. 8.55448e-12	sp|Q9S9U1|LRK71_ARATH L-type lectin-domain containing receptor kinase VII.1 OS=Arabidopsis thaliana GN=LECRK71 PE=2 SV=1 2.64379e-90	tr|B9N3G3|B9N3G3_POPTR Predicted protein OS=Populus trichocarpa GN=POPTRDRAFT_926315 PE=3 SV=1 6.0e-100	GO:0004674, protein serine/threonine kinase activity;GO:0005524, ATP binding;GO:0005886, plasma membrane;GO:0016021, integral component of membrane;GO:0030246, carbohydrate binding	-
TRINITY_DN39161_c0_g1	136.556	852.859	-2.64282	7.96e-12	5.32e-09	down	-	-	gi|566178030|ref|XP_002309519.2| hypothetical protein POPTR_0006s24950g, partial [Populus trichocarpa] 4.4e-12	gi|118486684|gb|EF147149.1| Populus trichocarpa clone WS01228_F12 unknown mRNA 0.0	-	-	-	-	-
TRINITY_DN44743_c0_g1	45.6654	20.5164	1.15432	0.000152709	0.00636591	up	-	-	gi|566165284|ref|XP_006384090.1| hypothetical protein POPTR_0004s06720g [Populus trichocarpa] 1.4e-25	gi|566165283|ref|XM_006384028.1| Populus trichocarpa hypothetical protein (POPTR_0004s06720g) mRNA, complete cds 0.0	-	-	tr|B9H284|B9H284_POPTR Predicted protein OS=Populus trichocarpa GN=POPTRDRAFT_555570 PE=4 SV=1 4.4e-10	-	-
TRINITY_DN57871_c0_g2	0.53155	13.0109	-4.61338	1.19e-06	0.000141271	down	-	-	gi|566178632|ref|XP_002309702.2| NBS-LRR resistance protein RGH2 [Populus trichocarpa] 2.3e-151	gi|566178633|ref|XM_002309668.2| Populus trichocarpa NBS-LRR resistance protein RGH2 (POPTR_0006s28660g) mRNA, complete cds 0.0	-	sp|Q7XA39|RGA4_SOLBU Putative disease resistance protein RGA4 OS=Solanum bulbocastanum GN=RGA4 PE=2 SV=1 3.59911e-24	tr|B9HBI8|B9HBI8_POPTR Nbs-lrr resistance protein OS=Populus trichocarpa GN=POPTRDRAFT_562060 PE=2 SV=1 6.3e-151	GO:0005524, ATP binding;GO:0006952, defense response;GO:0043531, ADP binding	-
TRINITY_DN49333_c1_g1	16.5367	79.7181	-2.26924	5.7e-08	1.09e-05	down	PLN02648, PLN02648, allene oxide synthase. 0.0	KOG0684, KOG0684, KOG0684, Cytochrome P450 [Secondary metabolites biosynthesis, transport and catabolism]. 6.12845e-08	gi|566202327|ref|XP_006375037.1| hypothetical protein POPTR_0014s03820g [Populus trichocarpa] 1.1e-281	gi|566202326|ref|XM_006374975.1| Populus trichocarpa hypothetical protein (POPTR_0014s03820g) mRNA, complete cds 0.0	-	sp|K4BV52|AOS1_SOLLC Allene oxide synthase 1, chloroplastic OS=Solanum lycopersicum GN=AOS1 PE=2 SV=1 0.0	tr|B9GP05|B9GP05_POPTR Cytochrome P450 allene oxide synthase OS=Populus trichocarpa GN=CYP74A1 PE=4 SV=1 6.7e-252	GO:0004497, monooxygenase activity;GO:0005506, iron ion binding;GO:0006952, defense response;GO:0009535, chloroplast thylakoid membrane;GO:0009695, jasmonic acid biosynthetic process;GO:0009941, chloroplast envelope;GO:0016125, sterol metabolic process;GO:0016705, oxidoreductase activity, acting on paired donors, with incorporation or reduction of molecular oxygen;GO:0020037, heme binding;GO:0031…	K01723-ko00592 alpha-Linolenic acid metabolism
TRINITY_DN41247_c0_g1	4.70061	15.4119	-1.71313	0.000232018	0.00860015	down	cd06468, p23_CacyBP, p23_like domain found in proteins similar to Calcyclin-Binding Protein(CacyBP)/Siah-1-interacting protein (SIP). CacyBP/SIP interacts with S100A6 (calcyclin), with some other members of the S100 family, with tubulin, and with Siah-1 and Skp-1. The latter two are components of the ubiquitin ligase that regulates beta-catenin degradation. The beta-catenin gene is an oncogene pa…	KOG3260, KOG3260, KOG3260, Calcyclin-binding protein CacyBP [Signal transduction mechanisms]. 1.49467e-45	gi|118489272|gb|ABK96441.1| unknown [Populus trichocarpa x Populus deltoides] 1.7e-120	gi|566194464|ref|XM_006377550.1| Populus trichocarpa SGS domain-containing family protein (POPTR_0011s08350g) mRNA, complete cds 0.0	-	sp|Q9CXW3|CYBP_MOUSE Calcyclin-binding protein OS=Mus musculus GN=Cacybp PE=1 SV=1 1.21785e-23	tr|A9PJ88|A9PJ88_9ROSI Putative uncharacterized protein OS=Populus trichocarpa x Populus deltoides PE=2 SV=1 7.1e-121	GO:0005641, nuclear envelope lumen;GO:0005654, nucleoplasm;GO:0005737, cytoplasm;GO:0030877, beta-catenin destruction complex;GO:0042803, protein homodimerization activity;GO:0070062, extracellular exosome	K04507-ko04310 Wnt signaling pathway
TRINITY_DN47569_c0_g1	9.09404	24.6441	-1.43825	0.00140315	0.0309807	down	TIGR00727, unnamed_protein_product, small oligopeptide transporter, OPT family. This model represents a family of transporters of small oligopeptides, demonstrated experimentally in three different species of yeast. A set of related proteins from the plant Arabidopsis thaliana forms an outgroup to the yeast set by neighbor joining analysis but is remarkably well conserved and is predicted here to…	KOG2262, KOG2262, KOG2262, Sexual differentiation process protein ISP4 [Signal transduction mechanisms]. 0.0	gi|566196448|ref|XP_002317799.2| hypothetical protein POPTR_0012s02660g [Populus trichocarpa] 3.7e-251	gi|566196447|ref|XM_002317763.2| Populus trichocarpa hypothetical protein (POPTR_0012s02660g) mRNA, complete cds 0.0	pfam03169, OPT, OPT oligopeptide transporter protein. The OPT family of oligopeptide transporters is distinct from the ABC pfam00005 and PTR pfam00854 transporter families. OPT transporters were first recognized in fungi (Candida albicans and Schizosaccharomyces pombe), but this alignment also includes orthologues from Arabidopsis thaliana. OPT transporters are thought to have 12-14 transmembrane…	sp|Q9T095|OPT6_ARATH Oligopeptide transporter 6 OS=Arabidopsis thaliana GN=OPT6 PE=2 SV=1 0.0	tr|B9I1Z9|B9I1Z9_POPTR Oligopeptide transporter OPT family OS=Populus trichocarpa GN=POPTRDRAFT_823225 PE=4 SV=1 1.1e-236	GO:0005886, plasma membrane;GO:0015031, protein transport;GO:0015833, peptide transport;GO:0016020, membrane;GO:0016021, integral component of membrane;GO:0055085, transmembrane transport	-
TRINITY_DN39518_c0_g1	10.0435	4.33927	1.21074	0.000978122	0.0239151	up	-	-	-	-	-	-	-	-	-
TRINITY_DN47009_c0_g2	618.223	302.568	1.03087	0.000918784	0.0229416	up	-	-	gi|118481511|gb|ABK92698.1| unknown [Populus trichocarpa] 5.2e-67	gi|566191226|ref|XM_002316065.2| Populus trichocarpa hypothetical protein (POPTR_0010s16860g) mRNA, complete cds 0.0	-	-	tr|A9P8J5|A9P8J5_POPTR Predicted protein OS=Populus trichocarpa GN=POPTRDRAFT_724071 PE=2 SV=1 2.2e-67	-	-
TRINITY_DN46298_c1_g3	6.68909	90.9302	-3.76488	4.14e-09	1.17e-06	down	PTZ00009, PTZ00009, heat shock 70 kDa protein; Provisional. 1.75711e-68	KOG0101, KOG0101, KOG0101, Molecular chaperones HSP70/HSC70, HSP70 superfamily [Posttranslational modification, protein turnover, chaperones]. 4.45281e-68	gi|224112795|ref|XP_002316294.1| heat shock protein 70 [Populus trichocarpa] 4.5e-66	gi|566192006|ref|XM_002316258.2| Populus trichocarpa heat shock protein 70 (POPTR_0010s21350g) mRNA, complete cds 0.0	pfam00012, HSP70, Hsp70 protein. Hsp70 chaperones help to fold many proteins. Hsp70 assisted folding involves repeated cycles of substrate binding and release. Hsp70 activity is ATP dependent. Hsp70 proteins are made up of two regions: the amino terminus is the ATPase domain and the carboxyl terminus is the substrate binding region. 8.17184e-49	sp|Q9LHA8|MD37C_ARATH Probable mediator of RNA polymerase II transcription subunit 37c OS=Arabidopsis thaliana GN=MED37C PE=1 SV=1 7.12618e-83	tr|B9HTJ7|B9HTJ7_POPTR Predicted protein OS=Populus trichocarpa GN=POPTRDRAFT_822482 PE=2 SV=1 1.9e-66	GO:0005524, ATP binding;GO:0005618, cell wall;GO:0005634, nucleus;GO:0005739, mitochondrion;GO:0005774, vacuolar membrane;GO:0005794, Golgi apparatus;GO:0005829, cytosol;GO:0005886, plasma membrane;GO:0006351, transcription, DNA-templated;GO:0006355, regulation of transcription, DNA-templated;GO:0009266, response to temperature stimulus;GO:0009408, response to heat;GO:0009615, response to virus;G…	-
TRINITY_DN54637_c1_g1	3.94226	27.2194	-2.78754	2.58e-06	0.000261498	down	cd02176, GH16_XET, Xyloglucan endotransglycosylase, member of glycosyl hydrolase family 16. Xyloglucan endotransglycosylases (XETs) cleave and religate xyloglucan polymers in plant cell walls via a transglycosylation mechanism. Xyloglucan is a soluble hemicellulose with a backbone of beta-1,4-linked glucose units, partially substituted with alpha-1,6-linked xylopyranose branches. It binds noncova…	-	gi|743902905|ref|XP_011044805.1| PREDICTED: brassinosteroid-regulated protein BRU1-like [Populus euphratica] 1.7e-40	gi|743902902|ref|XM_011046502.1| PREDICTED: Populus euphratica brassinosteroid-regulated protein BRU1-like (LOC105139871), mRNA 4.51612e-178	pfam06955, XET_C, Xyloglucan endo-transglycosylase (XET) C-terminus. This family represents the C-terminus (approximately 60 residues) of plant xyloglucan endo-transglycosylase (XET). Xyloglucan is the predominant hemicellulose in the cell walls of most dicotyledons. With cellulose, it forms a network that strengthens the cell wall. XET catalyzes the splitting of xyloglucan chains and the linking…	sp|P35694|XTH2_SOYBN Xyloglucan endotransglucosylase/hydrolase 2 OS=Glycine max PE=2 SV=1 4.38135e-32	tr|B9H806|B9H806_POPTR Predicted protein OS=Populus trichocarpa GN=POPTRDRAFT_862033 PE=2 SV=1 1.3e-40	GO:0004553, hydrolase activity, hydrolyzing O-glycosyl compounds;GO:0005618, cell wall;GO:0010411, xyloglucan metabolic process;GO:0016762, xyloglucan:xyloglucosyl transferase activity;GO:0042546, cell wall biogenesis;GO:0048046, apoplast	-
TRINITY_DN54637_c1_g2	2.02322	11.5568	-2.51402	1.68e-06	0.000183447	down	cd02176, GH16_XET, Xyloglucan endotransglycosylase, member of glycosyl hydrolase family 16. Xyloglucan endotransglycosylases (XETs) cleave and religate xyloglucan polymers in plant cell walls via a transglycosylation mechanism. Xyloglucan is a soluble hemicellulose with a backbone of beta-1,4-linked glucose units, partially substituted with alpha-1,6-linked xylopyranose branches. It binds noncova…	-	gi|566156497|ref|XP_002302146.2| xyloglucan endo-1 family protein [Populus trichocarpa] 2.1e-171	gi|743944532|ref|XM_011018483.1| PREDICTED: Populus euphratica probable xyloglucan endotransglucosylase/hydrolase protein 15 (LOC105120309), mRNA 0.0	pfam00722, Glyco_hydro_16, Glycosyl hydrolases family 16. 2.09542e-59	sp|Q38911|XTH15_ARATH Xyloglucan endotransglucosylase/hydrolase protein 15 OS=Arabidopsis thaliana GN=XTH15 PE=1 SV=1 4.87782e-148	tr|B9GT42|B9GT42_POPTR Predicted protein (Fragment) OS=Populus trichocarpa GN=POPTRDRAFT_411405 PE=4 SV=1 2.8e-162	GO:0004553, hydrolase activity, hydrolyzing O-glycosyl compounds;GO:0005618, cell wall;GO:0010411, xyloglucan metabolic process;GO:0016762, xyloglucan:xyloglucosyl transferase activity;GO:0033946, xyloglucan-specific endo-beta-1,4-glucanase activity;GO:0042546, cell wall biogenesis;GO:0048046, apoplast;GO:0071555, cell wall organization	-
TRINITY_DN54637_c1_g4	6.68791	40.6528	-2.60373	7.41e-07	9.56e-05	down	cd02176, GH16_XET, Xyloglucan endotransglycosylase, member of glycosyl hydrolase family 16. Xyloglucan endotransglycosylases (XETs) cleave and religate xyloglucan polymers in plant cell walls via a transglycosylation mechanism. Xyloglucan is a soluble hemicellulose with a backbone of beta-1,4-linked glucose units, partially substituted with alpha-1,6-linked xylopyranose branches. It binds noncova…	-	gi|743902903|ref|XP_011044804.1| PREDICTED: brassinosteroid-regulated protein BRU1-like [Populus euphratica] 2.3e-80	gi|566172685|ref|XM_002306700.2| Populus trichocarpa xyloglucan endo-1 family protein (POPTR_0005s22300g) mRNA, complete cds 0.0	pfam00722, Glyco_hydro_16, Glycosyl hydrolases family 16. 1.61301e-43	sp|P35694|XTH2_SOYBN Xyloglucan endotransglucosylase/hydrolase 2 OS=Glycine max PE=2 SV=1 3.02344e-85	tr|B9H805|B9H805_POPTR Predicted protein (Fragment) OS=Populus trichocarpa GN=POPTRDRAFT_205198 PE=2 SV=1 6.3e-80	GO:0004553, hydrolase activity, hydrolyzing O-glycosyl compounds;GO:0005618, cell wall;GO:0010411, xyloglucan metabolic process;GO:0016762, xyloglucan:xyloglucosyl transferase activity;GO:0042546, cell wall biogenesis;GO:0048046, apoplast;GO:0071555, cell wall organization	-
TRINITY_DN46584_c0_g1	22.2607	8.4271	1.40139	1.64e-06	0.000180825	up	PLN02966, PLN02966, cytochrome P450 83A1. 2.70461e-99	KOG0156, KOG0156, KOG0156, Cytochrome P450 CYP2 subfamily [Secondary metabolites biosynthesis, transport and catabolism]. 5.56385e-81	gi|566206817|ref|XP_002321643.2| methylcoclaurine hydroxylase family protein [Populus trichocarpa] 2.3e-118	gi|566206816|ref|XM_002321607.2| Populus trichocarpa methylcoclaurine hydroxylase family protein (POPTR_0015s09740g) mRNA, complete cds 0.0	pfam00067, p450, Cytochrome P450. Cytochrome P450s are haem-thiolate proteins involved in the oxidative degradation of various compounds. They are particularly well known for their role in the degradation of environmental toxins and mutagens. They can be divided into 4 classes, according to the method by which electrons from NAD(P)H are delivered to the catalytic site. Sequence conservation is re…	sp|P37117|C71A4_SOLME Cytochrome P450 71A4 OS=Solanum melongena GN=CYP71A4 PE=2 SV=1 1.89446e-133	tr|B9IF07|B9IF07_POPTR Predicted protein OS=Populus trichocarpa GN=POPTRDRAFT_776174 PE=3 SV=1 9.7e-119	GO:0004497, monooxygenase activity;GO:0005506, iron ion binding;GO:0016020, membrane;GO:0016021, integral component of membrane;GO:0016705, oxidoreductase activity, acting on paired donors, with incorporation or reduction of molecular oxygen;GO:0016709, oxidoreductase activity, acting on paired donors, with incorporation or reduction of molecular oxygen, NAD(P)H as one donor, and incorporation of…	-
TRINITY_DN54162_c0_g3	1.89756	6.35654	-1.7441	0.00282306	0.0488524	down	-	KOG0700, KOG0700, KOG0700, Protein phosphatase 2C/pyruvate dehydrogenase (lipoamide) phosphatase [Signal transduction mechanisms]. 5.57247e-25	gi|566187145|ref|XP_002313894.2| phosphatase 2C family protein [Populus trichocarpa] 1.1e-73	gi|743795036|ref|XM_011003322.1| PREDICTED: Populus euphratica probable protein phosphatase 2C 63 (LOC105108849), mRNA 0.0	-	sp|O81760|P2C63_ARATH Probable protein phosphatase 2C 63 OS=Arabidopsis thaliana GN=At4g33920 PE=2 SV=1 1.00818e-74	tr|B9HMW4|B9HMW4_POPTR Predicted protein OS=Populus trichocarpa GN=POPTRDRAFT_877867 PE=3 SV=1 1.7e-73	GO:0004722, protein serine/threonine phosphatase activity;GO:0046872, metal ion binding	-
TRINITY_DN54162_c0_g4	22.902	73.7223	-1.68663	0.000791531	0.0207514	down	-	KOG0700, KOG0700, KOG0700, Protein phosphatase 2C/pyruvate dehydrogenase (lipoamide) phosphatase [Signal transduction mechanisms]. 7.39278e-19	gi|566151843|ref|XP_002300254.2| hypothetical protein POPTR_0001s30440g [Populus trichocarpa] 2.8e-45	gi|743858138|ref|XM_011032069.1| PREDICTED: Populus euphratica probable protein phosphatase 2C 63 (LOC105129835), mRNA 0.0	-	sp|O81760|P2C63_ARATH Probable protein phosphatase 2C 63 OS=Arabidopsis thaliana GN=At4g33920 PE=2 SV=1 4.03679e-41	tr|B9GHV4|B9GHV4_POPTR Predicted protein OS=Populus trichocarpa GN=POPTRDRAFT_1069683 PE=3 SV=1 4.4e-45	GO:0004722, protein serine/threonine phosphatase activity;GO:0046872, metal ion binding	-
TRINITY_DN56338_c0_g1	5.12069	15.995	-1.64321	0.00230841	0.0423789	down	pfam00924, MS_channel, Mechanosensitive ion channel. Two members of this protein family from M. jannaschii have been functionally characterized. Both proteins form mechanosensitive (MS) ion channels upon reconstitution into liposomes and functional examination by the patch-clamp technique. Therefore this family are likely to also be MS channel proteins. 5.29677e-08	KOG4629, KOG4629, KOG4629, Predicted mechanosensitive ion channel [Cell wall/membrane/envelope biogenesis]. 1.45346e-123	gi|743921775|ref|XP_011004956.1| PREDICTED: mechanosensitive ion channel protein 10-like [Populus euphratica] 0.0e+00	gi|743935927|ref|XM_011014041.1| PREDICTED: Populus euphratica mechanosensitive ion channel protein 10-like (LOC105116611), mRNA 0.0	pfam00924, MS_channel, Mechanosensitive ion channel. Two members of this protein family from M. jannaschii have been functionally characterized. Both proteins form mechanosensitive (MS) ion channels upon reconstitution into liposomes and functional examination by the patch-clamp technique. Therefore this family are likely to also be MS channel proteins. 1.26544e-08	sp|Q9LYG9|MSL10_ARATH Mechanosensitive ion channel protein 10 OS=Arabidopsis thaliana GN=MSL10 PE=1 SV=1 3.84673e-169	tr|B9SDD4|B9SDD4_RICCO Putative uncharacterized protein OS=Ricinus communis GN=RCOM_1516710 PE=4 SV=1 4.4e-245	GO:0005886, plasma membrane;GO:0006820, anion transport;GO:0008381, mechanically-gated ion channel activity;GO:0010150, leaf senescence;GO:0016021, integral component of membrane;GO:0050982, detection of mechanical stimulus;GO:0055085, transmembrane transport;GO:0097468, programmed cell death in response to reactive oxygen species	-
TRINITY_DN47067_c1_g1	470.474	180.396	1.38295	0.000579414	0.0167155	up	PLN02439, PLN02439, arginine decarboxylase. 1.44004e-160	-	gi|224080476|ref|XP_002306141.1| arginine decarboxylase family protein [Populus trichocarpa] 1.1e-197	gi|566166969|ref|XM_002306105.2| Populus trichocarpa arginine decarboxylase family protein (POPTR_0004s17020g) mRNA, complete cds 0.0	-	sp|Q43075|SPE1_PEA Arginine decarboxylase OS=Pisum sativum PE=2 SV=1 3.25904e-173	tr|B9H0Y5|B9H0Y5_POPTR Arginine decarboxylase OS=Populus trichocarpa GN=POPTRDRAFT_713160 PE=3 SV=1 4.8e-198	GO:0006527, arginine catabolic process;GO:0008295, spermidine biosynthetic process;GO:0008792, arginine decarboxylase activity;GO:0009446, putrescine biosynthetic process;GO:0033388, putrescine biosynthetic process from arginine	K01583-ko00330 Arginine and proline metabolism
TRINITY_DN47067_c1_g3	445.223	191.438	1.21765	0.00128818	0.0292415	up	PLN02439, PLN02439, arginine decarboxylase. 9.82479e-131	-	gi|743884224|ref|XP_011037225.1| PREDICTED: arginine decarboxylase [Populus euphratica] 1.4e-182	gi|566166969|ref|XM_002306105.2| Populus trichocarpa arginine decarboxylase family protein (POPTR_0004s17020g) mRNA, complete cds 0.0	-	sp|O23141|SPE2_ARATH Arginine decarboxylase 2 OS=Arabidopsis thaliana GN=SPE2 PE=2 SV=1 2.59064e-180	tr|B9H0Y5|B9H0Y5_POPTR Arginine decarboxylase OS=Populus trichocarpa GN=POPTRDRAFT_713160 PE=3 SV=1 7.7e-183	GO:0006527, arginine catabolic process;GO:0006596, polyamine biosynthetic process;GO:0006970, response to osmotic stress;GO:0006979, response to oxidative stress;GO:0008295, spermidine biosynthetic process;GO:0008792, arginine decarboxylase activity;GO:0009409, response to cold;GO:0009446, putrescine biosynthetic process;GO:0009611, response to wounding;GO:0009651, response to salt stress;GO:0009…	K01583-ko00330 Arginine and proline metabolism
TRINITY_DN50813_c0_g1	24.5043	87.1194	-1.82996	5.8e-05	0.00302265	down	pfam01501, Glyco_transf_8, Glycosyl transferase family 8. This family includes enzymes that transfer sugar residues to donor molecules. Members of this family are involved in lipopolysaccharide biosynthesis and glycogen synthesis. This family includes Lipopolysaccharide galactosyltransferase, lipopolysaccharide glucosyltransferase 1, and glycogenin glucosyltransferase. 6.23094e-31	-	gi|743924960|ref|XP_011006612.1| PREDICTED: probable galacturonosyltransferase-like 9 [Populus euphratica] 4.8e-213	gi|104294906|gb|AC182723.2| Populus trichocarpa clone Pop1-93A21, complete sequence 0.0	pfam01501, Glyco_transf_8, Glycosyl transferase family 8. This family includes enzymes that transfer sugar residues to donor molecules. Members of this family are involved in lipopolysaccharide biosynthesis and glycogen synthesis. This family includes Lipopolysaccharide galactosyltransferase, lipopolysaccharide glucosyltransferase 1, and glycogenin glucosyltransferase. 1.48863e-31	sp|O04536|GATL9_ARATH Probable galacturonosyltransferase-like 9 OS=Arabidopsis thaliana GN=GATL9 PE=2 SV=1 0.0	tr|B9HLV6|B9HLV6_POPTR Glycosyltransferase, CAZy family GT8 OS=Populus trichocarpa GN=POPTRDRAFT_1085664 PE=4 SV=1 6.0e-202	GO:0000139, Golgi membrane;GO:0000271, polysaccharide biosynthetic process;GO:0005794, Golgi apparatus;GO:0016021, integral component of membrane;GO:0016757, transferase activity, transferring glycosyl groups;GO:0045489, pectin biosynthetic process;GO:0047262, polygalacturonate 4-alpha-galacturonosyltransferase activity;GO:0071555, cell wall organization	-
TRINITY_DN55555_c1_g1	1.54874	9.56571	-2.62678	1.09e-06	0.000131177	down	pfam00931, NB-ARC, NB-ARC domain. 6.09594e-37	KOG4658, KOG4658, KOG4658, Apoptotic ATPase [Signal transduction mechanisms]. 4.06425e-41	gi|566169283|ref|XP_006382614.1| NBS-LRR resistance gene-like protein ARGH34 [Populus trichocarpa] 0.0e+00	gi|566169282|ref|XM_006382552.1| Populus trichocarpa NBS-LRR resistance gene-like protein ARGH34 (POPTR_0005s03780g) mRNA, complete cds 0.0	pfam00931, NB-ARC, NB-ARC domain. 1.45637e-37	sp|Q39214|RPM1_ARATH Disease resistance protein RPM1 OS=Arabidopsis thaliana GN=RPM1 PE=1 SV=1 7.36654e-112	tr|B9MZT9|B9MZT9_POPTR Cc-nbs-lrr resistance protein OS=Populus trichocarpa GN=POPTRDRAFT_595584 PE=4 SV=1 0.0e+00	GO:0000166, nucleotide binding;GO:0005524, ATP binding;GO:0005886, plasma membrane;GO:0009626, plant-type hypersensitive response;GO:0012505, endomembrane system;GO:0019897, extrinsic component of plasma membrane;GO:0043531, ADP binding	-
TRINITY_DN57927_c3_g2	90.4451	24.8879	1.86159	9.74e-06	0.000744854	up	cd03009, TryX_like_TryX_NRX, Tryparedoxin (TryX)-like family, TryX and nucleoredoxin (NRX) subfamily; TryX and NRX are thioredoxin (TRX)-like protein disulfide oxidoreductases that alter the redox state of target proteins via the reversible oxidation of an active center CXXC motif. TryX is involved in the regulation of oxidative stress in parasitic trypanosomatids by reducing TryX peroxidase, whi…	KOG2501, KOG2501, KOG2501, Thioredoxin, nucleoredoxin and related proteins [General function prediction only]. 1.8515e-25	gi|566189515|ref|XP_002314534.2| hypothetical protein POPTR_0010s07000g [Populus trichocarpa] 1.1e-200	gi|566189514|ref|XM_002314498.2| Populus trichocarpa hypothetical protein (POPTR_0010s07000g) mRNA, complete cds 0.0	pfam13905, Thioredoxin_8, Thioredoxin-like. Thioredoxins are small enzymes that participate in redox reactions, via the reversible oxidation of an active centre disulfide bond. 1.39897e-14	sp|O80763|NRX1_ARATH Probable nucleoredoxin 1 OS=Arabidopsis thaliana GN=At1g60420 PE=1 SV=1 1.02715e-152	tr|B9HSZ4|B9HSZ4_POPTR Predicted protein OS=Populus trichocarpa GN=POPTRDRAFT_1089618 PE=4 SV=1 1.5e-196	GO:0005623, cell;GO:0005829, cytosol;GO:0009860, pollen tube growth;GO:0010183, pollen tube guidance;GO:0045454, cell redox homeostasis;GO:0046686, response to cadmium ion;GO:0047134, protein-disulfide reductase activity;GO:0080092, regulation of pollen tube growth	-
TRINITY_DN57927_c3_g3	24.6823	4.99235	2.30569	4.44e-05	0.00245736	up	cd03009, TryX_like_TryX_NRX, Tryparedoxin (TryX)-like family, TryX and nucleoredoxin (NRX) subfamily; TryX and NRX are thioredoxin (TRX)-like protein disulfide oxidoreductases that alter the redox state of target proteins via the reversible oxidation of an active center CXXC motif. TryX is involved in the regulation of oxidative stress in parasitic trypanosomatids by reducing TryX peroxidase, whi…	KOG2501, KOG2501, KOG2501, Thioredoxin, nucleoredoxin and related proteins [General function prediction only]. 7.27477e-24	gi|566189515|ref|XP_002314534.2| hypothetical protein POPTR_0010s07000g [Populus trichocarpa] 1.8e-54	gi|743896465|ref|XM_011043203.1| PREDICTED: Populus euphratica probable nucleoredoxin 1 (LOC105137461), mRNA 6.37446e-171	pfam13905, Thioredoxin_8, Thioredoxin-like. Thioredoxins are small enzymes that participate in redox reactions, via the reversible oxidation of an active centre disulfide bond. 6.36657e-15	sp|O80763|NRX1_ARATH Probable nucleoredoxin 1 OS=Arabidopsis thaliana GN=At1g60420 PE=1 SV=1 3.70168e-42	tr|B9HSZ4|B9HSZ4_POPTR Predicted protein OS=Populus trichocarpa GN=POPTRDRAFT_1089618 PE=4 SV=1 2.9e-54	GO:0005623, cell;GO:0005829, cytosol;GO:0009860, pollen tube growth;GO:0010183, pollen tube guidance;GO:0045454, cell redox homeostasis;GO:0046686, response to cadmium ion;GO:0047134, protein-disulfide reductase activity;GO:0080092, regulation of pollen tube growth	-
TRINITY_DN47390_c0_g3	13.7113	2.67224	2.35925	4.17e-08	8.5e-06	up	smart00332, PP2Cc, Serine/threonine phosphatases, family 2C, catalytic domain. The protein architecture and deduced catalytic mechanism of PP2C phosphatases are similar to the PP1, PP2A, PP2B family of protein Ser/Thr phosphatases, with which PP2C shares no sequence similarity. 2.90368e-50	KOG0698, KOG0698, KOG0698, Serine/threonine protein phosphatase [Signal transduction mechanisms]. 4.10599e-45	gi|743915862|ref|XP_011001894.1| PREDICTED: probable protein phosphatase 2C 51 [Populus euphratica] 2.6e-184	gi|743915861|ref|XM_011003592.1| PREDICTED: Populus euphratica probable protein phosphatase 2C 51 (LOC105109020), mRNA 0.0	pfam00481, PP2C, Protein phosphatase 2C. Protein phosphatase 2C is a Mn++ or Mg++ dependent protein serine/threonine phosphatase. 2.86012e-35	sp|Q65XK7|P2C51_ORYSJ Probable protein phosphatase 2C 51 OS=Oryza sativa subsp. japonica GN=Os05g0572700 PE=2 SV=1 2.17488e-93	tr|B9I570|B9I570_POPTR Predicted protein (Fragment) OS=Populus trichocarpa GN=POPTRDRAFT_422871 PE=3 SV=1 9.6e-133	GO:0004722, protein serine/threonine phosphatase activity;GO:0046872, metal ion binding	K14497-ko04016 MAPK signaling pathway - plant;ko04075 Plant hormone signal transduction
TRINITY_DN47390_c0_g1	7.97076	0.279574	4.83342	6.31e-05	0.00321752	up	smart00332, PP2Cc, Serine/threonine phosphatases, family 2C, catalytic domain. The protein architecture and deduced catalytic mechanism of PP2C phosphatases are similar to the PP1, PP2A, PP2B family of protein Ser/Thr phosphatases, with which PP2C shares no sequence similarity. 5.37721e-26	KOG0698, KOG0698, KOG0698, Serine/threonine protein phosphatase [Signal transduction mechanisms]. 2.38539e-22	gi|566205491|ref|XP_002321444.2| hypothetical protein POPTR_0015s02070g [Populus trichocarpa] 8.6e-86	gi|566205490|ref|XM_002321408.2| Populus trichocarpa hypothetical protein (POPTR_0015s02070g) mRNA, complete cds 0.0	pfam00481, PP2C, Protein phosphatase 2C. Protein phosphatase 2C is a Mn++ or Mg++ dependent protein serine/threonine phosphatase. 2.50611e-16	sp|Q65XK7|P2C51_ORYSJ Probable protein phosphatase 2C 51 OS=Oryza sativa subsp. japonica GN=Os05g0572700 PE=2 SV=1 6.44602e-44	tr|B9IDW5|B9IDW5_POPTR Predicted protein OS=Populus trichocarpa GN=POPTRDRAFT_900520 PE=3 SV=1 4.0e-53	GO:0004722, protein serine/threonine phosphatase activity;GO:0046872, metal ion binding	-
TRINITY_DN50057_c0_g5	59.0346	27.0435	1.12628	0.00021387	0.00812438	up	cd01803, Ubiquitin, Ubiquitin. Ubiquitin (includes Ubq/RPL40e and Ubq/RPS27a fusions as well as homopolymeric multiubiquitin protein chains). 1.10528e-23	KOG0004, KOG0004, KOG0004, Ubiquitin/40S ribosomal protein S27a fusion [Translation, ribosomal structure and biogenesis]. 7.01576e-57	gi|568815688|ref|NP_001275598.1| ubiquitin-40S ribosomal protein S27a-like [Solanum tuberosum] 1.1e-50	gi|566147524|ref|XM_002297716.2| Populus trichocarpa ubiquitin/ribosomal protein 27a (POPTR_0001s06260g) mRNA, complete cds 0.0	pfam01599, Ribosomal_S27, Ribosomal protein S27a. This family of ribosomal proteins consists mainly of the 40S ribosomal protein S27a which is synthesized as a C-terminal extension of ubiquitin (CEP). The S27a domain compromises the C-terminal half of the protein. The synthesis of ribosomal proteins as extensions of ubiquitin promotes their incorporation into nascent ribosomes by a transient meta…	sp|P62981|RS27A_SOLTU Ubiquitin-40S ribosomal protein S27a OS=Solanum tuberosum GN=UBI3 PE=2 SV=2 4.86665e-65	tr|A9P863|A9P863_POPTR Predicted protein OS=Populus trichocarpa GN=POPTRDRAFT_547834 PE=2 SV=1 4.6e-51	GO:0003735, structural constituent of ribosome;GO:0005634, nucleus;GO:0005794, Golgi apparatus;GO:0005840, ribosome;GO:0006412, translation;GO:0022627, cytosolic small ribosomal subunit;GO:0046872, metal ion binding	-
TRINITY_DN56152_c3_g2	45.104	126.562	-1.48852	0.000696993	0.0188919	down	-	-	-	gi|743900346|ref|XM_011045168.1| PREDICTED: Populus euphratica proline-rich receptor-like protein kinase PERK1 (LOC105138930), transcript variant X2, mRNA 6.51047e-162	-	-	-	-	-
TRINITY_DN46575_c0_g2	13.718	107.891	-2.97543	3.18e-08	6.86e-06	down	pfam00011, HSP20, Hsp20/alpha crystallin family. Not only do small heat-shock-proteins occur in eukaryotes and prokaryotes but they have also now been shown to occur in cyanobacterial phages as well as their bacterial hosts. 2.93459e-09	KOG0710, KOG0710, KOG0710, Molecular chaperone (small heat-shock protein Hsp26/Hsp42) [Posttranslational modification, protein turnover, chaperones]. 9.91697e-12	gi|224071519|ref|XP_002303499.1| Heat shock 22 kDa family protein [Populus trichocarpa] 9.9e-60	gi|162809357|gb|AC215893.1| Populus trichocarpa clone ACSB2193-F18, complete sequence 0.0	pfam00011, HSP20, Hsp20/alpha crystallin family. Not only do small heat-shock-proteins occur in eukaryotes and prokaryotes but they have also now been shown to occur in cyanobacterial phages as well as their bacterial hosts. 7.01099e-10	sp|P46254|HS22M_PEA Heat shock 22 kDa protein, mitochondrial OS=Pisum sativum GN=HSP22 PE=2 SV=1 3.03313e-51	tr|B9GVE8|B9GVE8_POPTR Predicted protein OS=Populus trichocarpa GN=POPTRDRAFT_817274 PE=3 SV=1 4.2e-60	GO:0005739, mitochondrion	K13993-ko04141 Protein processing in endoplasmic reticulum
TRINITY_DN50304_c0_g1	9.9676	3.23021	1.62562	0.000198298	0.00772478	up	PLN02393, PLN02393, leucoanthocyanidin dioxygenase like protein. 4.78474e-84	KOG0143, KOG0143, KOG0143, Iron/ascorbate family oxidoreductases [Secondary metabolites biosynthesis, transport and catabolism, General function prediction only]. 5.50009e-26	gi|224109308|ref|XP_002315155.1| oxidoreductase family protein [Populus trichocarpa] 1.2e-95	gi|743879418|ref|XM_011037625.1| PREDICTED: Populus euphratica leucoanthocyanidin dioxygenase-like (LOC105133577), mRNA 0.0	pfam14226, DIOX_N, non-haem dioxygenase in morphine synthesis N-terminal. This is the highly conserved N-terminal region of proteins with 2-oxoglutarate/Fe(II)-dependent dioxygenase activity. 2.56522e-26	sp|P51091|LDOX_MALDO Leucoanthocyanidin dioxygenase OS=Malus domestica GN=ANS PE=2 SV=1 6.54394e-26	tr|B9HSN0|B9HSN0_POPTR Predicted protein OS=Populus trichocarpa GN=POPTRDRAFT_822387 PE=3 SV=1 4.9e-96	GO:0005506, iron ion binding;GO:0009718, anthocyanin-containing compound biosynthetic process;GO:0031418, L-ascorbic acid binding;GO:0046872, metal ion binding;GO:0050589, leucocyanidin oxygenase activity;GO:0051213, dioxygenase activity	-
TRINITY_DN50304_c0_g2	11.6287	1.97992	2.55417	0.000288152	0.010145	up	PLN02393, PLN02393, leucoanthocyanidin dioxygenase like protein. 3.11011e-72	KOG0143, KOG0143, KOG0143, Iron/ascorbate family oxidoreductases [Secondary metabolites biosynthesis, transport and catabolism, General function prediction only]. 1.68751e-29	gi|224109308|ref|XP_002315155.1| oxidoreductase family protein [Populus trichocarpa] 4.4e-70	gi|566191675|ref|XM_002315119.2| Populus trichocarpa oxidoreductase family protein (POPTR_0010s19530g) mRNA, complete cds 0.0	pfam03171, 2OG-FeII_Oxy, 2OG-Fe(II) oxygenase superfamily. This family contains members of the 2-oxoglutarate (2OG) and Fe(II)-dependent oxygenase superfamily. This family includes the C-terminal of prolyl 4-hydroxylase alpha subunit. The holoenzyme has the activity EC:1.14.11.2 catalysing the reaction: Procollagen L-proline + 2-oxoglutarate + O2 <=; procollagen trans- 4-hydroxy-L-proline + succi…	sp|O65378|ACCO3_ARATH 1-aminocyclopropane-1-carboxylate oxidase 3 OS=Arabidopsis thaliana GN=At1g12010 PE=2 SV=1 3.40998e-30	tr|B9HSN0|B9HSN0_POPTR Predicted protein OS=Populus trichocarpa GN=POPTRDRAFT_822387 PE=3 SV=1 1.9e-70	GO:0005506, iron ion binding;GO:0006952, defense response;GO:0009693, ethylene biosynthetic process;GO:0009815, 1-aminocyclopropane-1-carboxylate oxidase activity;GO:0031418, L-ascorbic acid binding;GO:0046872, metal ion binding;GO:0051213, dioxygenase activity;GO:0071398, cellular response to fatty acid	-
TRINITY_DN50447_c3_g1	0.978445	6.39946	-2.70939	0.000115722	0.00521505	down	pfam02704, GASA, Gibberellin regulated protein. This is the GASA gibberellin regulated cysteine rich protein family. The expression of these proteins is up-regulated by the plant hormone gibberellin, most of these proteins have some role in plant development. There are 12 cysteine residues conserved within the alignment giving the potential for these proteins to posses 6 disulphide bonds. 3.20118…	-	gi|671723173|gb|AII82562.1| GA stimulated protein 4 [Populus x canadensis] 9.9e-34	gi|566212831|ref|XM_002323821.2| Populus trichocarpa hypothetical protein (POPTR_0017s11940g) mRNA, complete cds 0.0	pfam02704, GASA, Gibberellin regulated protein. This is the GASA gibberellin regulated cysteine rich protein family. The expression of these proteins is up-regulated by the plant hormone gibberellin, most of these proteins have some role in plant development. There are 12 cysteine residues conserved within the alignment giving the potential for these proteins to posses 6 disulphide bonds. 7.64789…	sp|P46690|GASA4_ARATH Gibberellin-regulated protein 4 OS=Arabidopsis thaliana GN=GASA4 PE=1 SV=2 3.44443e-29	tr|A9P8E0|A9P8E0_POPTR Predicted protein OS=Populus trichocarpa GN=POPTRDRAFT_668570 PE=4 SV=1 4.1e-34	GO:0005576, extracellular region;GO:0005623, cell;GO:0009739, response to gibberellin;GO:0009740, gibberellic acid mediated signaling pathway;GO:0045454, cell redox homeostasis	-
TRINITY_DN56325_c2_g1	75.621	497.44	-2.71766	4.02e-12	2.92e-09	down	-	-	-	-	-	-	-	-	-
TRINITY_DN55803_c0_g2	269.157	46.6391	2.52884	4.1e-11	2.2e-08	up	PLN02438, PLN02438, inositol-3-phosphate synthase. 0.0	KOG0693, KOG0693, KOG0693, Myo-inositol-1-phosphate synthase [Lipid transport and metabolism]. 0.0	gi|566170121|ref|XP_002307107.2| 1L-myo-inositol 1-phosphate synthase family protein [Populus trichocarpa] 1.7e-253	gi|566170116|ref|XM_006382847.1| Populus trichocarpa hypothetical protein (POPTR_0005s08050g) mRNA, complete cds 0.0	pfam07994, NAD_binding_5, Myo-inositol-1-phosphate synthase. This is a family of myo-inositol-1-phosphate synthases. Inositol-1-phosphate catalyzes the conversion of glucose-6- phosphate to inositol-1-phosphate, which is then dephosphorylated to inositol. Inositol phosphates play an important role in signal transduction. 0.0	sp|Q9SSV4|INO1_NICPA Inositol-3-phosphate synthase OS=Nicotiana paniculata GN=INPS1 PE=2 SV=1 0.0	tr|B9H558|B9H558_POPTR Predicted protein OS=Populus trichocarpa GN=POPTRDRAFT_831371 PE=4 SV=1 1.9e-254	GO:0004512, inositol-3-phosphate synthase activity;GO:0005737, cytoplasm;GO:0006021, inositol biosynthetic process;GO:0008654, phospholipid biosynthetic process	K01858-ko00562 Inositol phosphate metabolism;ko00521 Streptomycin biosynthesis
TRINITY_DN55803_c0_g1	7.89469	0.865022	3.19007	9.54e-08	1.68e-05	up	-	-	-	gi|566179798|ref|XM_002310544.2| Populus trichocarpa 1L-myo-inositol 1-phosphate synthase family protein (POPTR_0007s05810g) mRNA, complete cds 0.0	-	-	-	-	-
TRINITY_DN54959_c0_g1	5.39581	1.57291	1.7784	4.24e-06	0.000390567	up	-	-	gi|224121364|ref|XP_002318564.1| hypothetical protein POPTR_0012s05610g [Populus trichocarpa] 1.2e-74	gi|566196953|ref|XM_002318528.2| Populus trichocarpa hypothetical protein (POPTR_0012s05610g) mRNA, complete cds 0.0	-	-	tr|B9I2P8|B9I2P8_POPTR Predicted protein OS=Populus trichocarpa GN=POPTRDRAFT_823303 PE=4 SV=1 4.9e-75	-	-
TRINITY_DN50645_c0_g1	8.68094	2.02526	2.09974	4.43e-06	0.000405257	up	PTZ00101, PTZ00101, rhomboid-1 protease; Provisional. 7.74776e-07	KOG2289, KOG2289, KOG2289, Rhomboid family proteins [Signal transduction mechanisms]. 1.72198e-67	gi|743815091|ref|XP_011019857.1| PREDICTED: rhomboid-like protease 2 [Populus euphratica] 1.6e-192	gi|743815090|ref|XM_011021555.1| PREDICTED: Populus euphratica rhomboid-like protease 2 (LOC105122452), mRNA 0.0	pfam01694, Rhomboid, Rhomboid family. This family contains integral membrane proteins that are related to Drosophila rhomboid protein. Members of this family are found in bacteria and eukaryotes. Rhomboid promotes the cleavage of the membrane-anchored TGF-alpha-like growth factor Spitz, allowing it to activate the Drosophila EGF receptor. Analysis has shown that Rhomboid-1 is an intramembrane ser…	sp|Q0WQX7|RBL1_ARATH RHOMBOID-like protein 1 OS=Arabidopsis thaliana GN=RBL1 PE=2 SV=1 8.24279e-145	tr|B9HBM6|B9HBM6_POPTR Predicted protein OS=Populus trichocarpa GN=POPTRDRAFT_1080642 PE=4 SV=1 1.1e-171	GO:0000139, Golgi membrane;GO:0004252, serine-type endopeptidase activity;GO:0005794, Golgi apparatus;GO:0016021, integral component of membrane;GO:0016485, protein processing	-
TRINITY_DN48601_c0_g2	5.35265	2.32005	1.2061	0.00132205	0.0296681	up	-	-	-	-	-	-	-	-	-
TRINITY_DN56537_c1_g3	6.38876	20.4191	-1.67631	0.000116984	0.00524982	down	cd09912, DLP_2, Dynamin-like protein including dynamins, mitofusins, and guanylate-binding proteins. The dynamin family of large mechanochemical GTPases includes the classical dynamins and dynamin-like proteins (DLPs) that are found throughout the Eukarya. This family also includes bacterial DLPs. These proteins catalyze membrane fission during clathrin-mediated endocytosis. Dynamin consists of f…	KOG0448, KOG0448, KOG0448, Mitofusin 1 GTPase, involved in mitochondrila biogenesis [Posttranslational modification, protein turnover, chaperones]. 6.50448e-07	gi|566172813|ref|XP_002307580.2| hypothetical protein POPTR_0005s23080g [Populus trichocarpa] 6.3e-165	gi|566172812|ref|XM_002307544.2| Populus trichocarpa hypothetical protein (POPTR_0005s23080g) mRNA, complete cds 0.0	-	sp|Q1KPV0|FZL_ARATH Probable transmembrane GTPase FZO-like, chloroplastic OS=Arabidopsis thaliana GN=FZL PE=1 SV=1 2.29772e-101	tr|B9H880|B9H880_POPTR Predicted protein (Fragment) OS=Populus trichocarpa GN=POPTRDRAFT_205434 PE=4 SV=1 2.0e-149	GO:0003924, GTPase activity;GO:0004789, thiamine-phosphate diphosphorylase activity;GO:0005525, GTP binding;GO:0009228, thiamine biosynthetic process;GO:0009507, chloroplast;GO:0009535, chloroplast thylakoid membrane;GO:0009706, chloroplast inner membrane;GO:0010027, thylakoid membrane organization;GO:0010228, vegetative to reproductive phase transition of meristem;GO:0016021, integral component …	-
TRINITY_DN48734_c1_g3	5.02113	1.12846	2.15365	0.00065357	0.018087	up	PLN00131, PLN00131, hypothetical protein; Provisional. 1.47052e-28	-	gi|566212315|ref|XP_006373140.1| hypothetical protein POPTR_0017s09080g [Populus trichocarpa] 2.4e-14	gi|161789306|gb|AC215624.1| Populus trichocarpa clone POP006-B08, complete sequence 0.0	-	-	tr|B9NEB1|B9NEB1_POPTR Predicted protein OS=Populus trichocarpa GN=POPTRDRAFT_594688 PE=4 SV=1 4.1e-21	-	-
TRINITY_DN46030_c0_g1	18.6136	70.6092	-1.9235	6.24e-06	0.00052926	down	pfam03959, FSH1, Serine hydrolase (FSH1). This is a family of serine hydrolases. 6.42641e-11	KOG2551, KOG2551, KOG2551, Phospholipase/carboxyhydrolase [Amino acid transport and metabolism]. 3.63386e-13	gi|118485915|gb|ABK94803.1| unknown [Populus trichocarpa] 1.7e-78	gi|566174154|ref|XM_002307901.2| Populus trichocarpa hypothetical protein (POPTR_0006s02780g) mRNA, complete cds 0.0	pfam03959, FSH1, Serine hydrolase (FSH1). This is a family of serine hydrolases. 1.53532e-11	sp|P36591|DYR_SCHPO Dihydrofolate reductase OS=Schizosaccharomyces pombe (strain 972 / ATCC 24843) GN=dfr1 PE=2 SV=2 8.96768e-06	tr|A9PEK0|A9PEK0_POPTR Putative uncharacterized protein OS=Populus trichocarpa PE=2 SV=1 7.0e-79	GO:0004146, dihydrofolate reductase activity;GO:0005524, ATP binding;GO:0005829, cytosol;GO:0006545, glycine biosynthetic process;GO:0006730, one-carbon metabolic process;GO:0009165, nucleotide biosynthetic process;GO:0046452, dihydrofolate metabolic process;GO:0046654, tetrahydrofolate biosynthetic process;GO:0050661, NADP binding	-
TRINITY_DN52785_c0_g1	2.05306	11.4025	-2.47351	5.96e-10	2.28e-07	down	pfam04833, COBRA, COBRA-like protein. Family of plant proteins are designated COBRA-like (COBL) proteins. The 12 Arabidopsis members of the family are all GPI-liked. Some members of this family are annotated as phytochelatin synthase, but these annotations are incorrect. 1.23636e-47	-	gi|743905951|ref|XP_011046385.1| PREDICTED: COBRA-like protein 7 [Populus euphratica] 0.0e+00	gi|743905950|ref|XM_011048083.1| PREDICTED: Populus euphratica COBRA-like protein 7 (LOC105141019), mRNA 0.0	pfam04833, COBRA, COBRA-like protein. Family of plant proteins are designated COBRA-like (COBL) proteins. The 12 Arabidopsis members of the family are all GPI-liked. Some members of this family are annotated as phytochelatin synthase, but these annotations are incorrect. 2.95377e-48	sp|Q8GZ17|COBL7_ARATH COBRA-like protein 7 OS=Arabidopsis thaliana GN=COBL7 PE=1 SV=2 0.0	tr|A9PEE4|A9PEE4_POPTR Predicted protein OS=Populus trichocarpa GN=POPTRDRAFT_821674 PE=2 SV=1 0.0e+00	GO:0005768, endosome;GO:0005794, Golgi apparatus;GO:0005802, trans-Golgi network;GO:0009506, plasmodesma;GO:0010215, cellulose microfibril organization;GO:0016021, integral component of membrane;GO:0016049, cell growth;GO:0031225, anchored component of membrane;GO:0046658, anchored component of plasma membrane	-
TRINITY_DN51092_c0_g1	7.89719	3.28572	1.26513	0.00161948	0.0336241	up	-	KOG2183, KOG2183, KOG2183, Prolylcarboxypeptidase (angiotensinase C) [Posttranslational modification, protein turnover, chaperones, General function prediction only]. 5.99567e-17	gi|566215399|ref|XP_002324555.2| serine carboxypeptidase S28 family protein [Populus trichocarpa] 4.0e-57	gi|566215396|ref|XM_006372064.1| Populus trichocarpa hypothetical protein (POPTR_0018s11920g) mRNA, complete cds 0.0	-	sp|Q9EPB1|DPP2_RAT Dipeptidyl peptidase 2 OS=Rattus norvegicus GN=Dpp7 PE=1 SV=1 1.52743e-10	tr|A9PH71|A9PH71_POPTR Putative uncharacterized protein OS=Populus trichocarpa PE=2 SV=1 1.7e-57	GO:0004185, serine-type carboxypeptidase activity;GO:0005764, lysosome;GO:0005794, Golgi apparatus;GO:0005829, cytosol;GO:0006508, proteolysis;GO:0008239, dipeptidyl-peptidase activity;GO:0031982, vesicle;GO:0070062, extracellular exosome	-
TRINITY_DN51092_c0_g2	9.19981	4.0349	1.18907	0.00089552	0.0225158	up	pfam05577, Peptidase_S28, Serine carboxypeptidase S28. These serine proteases include several eukaryotic enzymes such as lysosomal Pro-X carboxypeptidase, dipeptidyl-peptidase II, and thymus-specific serine peptidase. 1.34435e-08	KOG2183, KOG2183, KOG2183, Prolylcarboxypeptidase (angiotensinase C) [Posttranslational modification, protein turnover, chaperones, General function prediction only]. 4.86984e-30	gi|118487656|gb|ABK95653.1| unknown [Populus trichocarpa] 5.9e-55	gi|118487800|gb|EF147718.1| Populus trichocarpa clone WS0124_I08 unknown mRNA 0.0	pfam05577, Peptidase_S28, Serine carboxypeptidase S28. These serine proteases include several eukaryotic enzymes such as lysosomal Pro-X carboxypeptidase, dipeptidyl-peptidase II, and thymus-specific serine peptidase. 3.21176e-09	sp|Q2TA14|PCP_BOVIN Lysosomal Pro-X carboxypeptidase OS=Bos taurus GN=PRCP PE=2 SV=1 8.63874e-24	tr|A9PH71|A9PH71_POPTR Putative uncharacterized protein OS=Populus trichocarpa PE=2 SV=1 2.5e-55	GO:0003085, negative regulation of systemic arterial blood pressure;GO:0004185, serine-type carboxypeptidase activity;GO:0005764, lysosome;GO:0006508, proteolysis;GO:0008239, dipeptidyl-peptidase activity;GO:0043535, regulation of blood vessel endothelial cell migration;GO:0060055, angiogenesis involved in wound healing	-
TRINITY_DN45459_c1_g10	35.2871	123.479	-1.80705	0.000607512	0.0172599	down	-	-	gi|566151843|ref|XP_002300254.2| hypothetical protein POPTR_0001s30440g [Populus trichocarpa] 1.2e-41	gi|566151842|ref|XM_002300218.2| Populus trichocarpa hypothetical protein (POPTR_0001s30440g) mRNA, complete cds 1.98006e-160	-	sp|O81760|P2C63_ARATH Probable protein phosphatase 2C 63 OS=Arabidopsis thaliana GN=At4g33920 PE=2 SV=1 7.55511e-27	tr|B9GHV4|B9GHV4_POPTR Predicted protein OS=Populus trichocarpa GN=POPTRDRAFT_1069683 PE=3 SV=1 4.9e-42	GO:0004722, protein serine/threonine phosphatase activity;GO:0046872, metal ion binding	-
TRINITY_DN45534_c0_g1	6.56651	45.9953	-2.80829	3.32e-07	4.86e-05	down	pfam02469, Fasciclin, Fasciclin domain. This extracellular domain is found repeated four times in grasshopper fasciclin I as well as in proteins from mammals, sea urchins, plants, yeast and bacteria. 8.27608e-07	-	gi|224130034|ref|XP_002320736.1| Fasciclin-like arabinogalactan protein 8 precursor [Populus trichocarpa] 1.6e-168	gi|743788843|ref|XM_011036316.1| PREDICTED: Populus euphratica fasciclin-like arabinogalactan protein 10 (LOC105132684), mRNA 0.0	pfam02469, Fasciclin, Fasciclin domain. This extracellular domain is found repeated four times in grasshopper fasciclin I as well as in proteins from mammals, sea urchins, plants, yeast and bacteria. 1.97723e-07	sp|O22126|FLA8_ARATH Fasciclin-like arabinogalactan protein 8 OS=Arabidopsis thaliana GN=FLA8 PE=1 SV=1 1.17651e-171	tr|B9IC18|B9IC18_POPTR Predicted protein OS=Populus trichocarpa GN=POPTRDRAFT_730906 PE=4 SV=1 6.8e-169	GO:0005886, plasma membrane;GO:0009505, plant-type cell wall;GO:0031225, anchored component of membrane;GO:0046658, anchored component of plasma membrane;GO:0048046, apoplast	-
TRINITY_DN58018_c1_g2	0.68813	5.49233	-2.99666	2.68e-09	8.24e-07	down	pfam16908, VPS13, Vacuolar sorting-associated protein 13, N-terminal. VPS13 is a family of eukaryotic vacuolar sorting-associated 13 proteins that lies just downstream from Chorein_N family, pfam12624. The exact function of this domain is not known. 9.13354e-37	KOG1809, KOG1809, KOG1809, Vacuolar protein sorting-associated protein [Intracellular trafficking, secretion, and vesicular transport]. 6.68788e-43	gi|743810111|ref|XP_011018665.1| PREDICTED: uncharacterized protein LOC105121634 [Populus euphratica] 0.0e+00	gi|566160689|ref|XM_002304099.2| Populus trichocarpa hypothetical protein (POPTR_0003s03360g) mRNA, complete cds 0.0	pfam16908, VPS13, Vacuolar sorting-associated protein 13, N-terminal. VPS13 is a family of eukaryotic vacuolar sorting-associated 13 proteins that lies just downstream from Chorein_N family, pfam12624. The exact function of this domain is not known. 2.18208e-37	sp|Q54LB8|VP13A_DICDI Putative vacuolar protein sorting-associated protein 13A OS=Dictyostelium discoideum GN=vps13A PE=2 SV=1 2.09206e-39	tr|B9RUS0|B9RUS0_RICCO Vacuolar protein sorting-associated protein, putative OS=Ricinus communis GN=RCOM_0856160 PE=4 SV=1 9.8e-265	GO:0005622, intracellular;GO:0005794, Golgi apparatus;GO:0006623, protein targeting to vacuole;GO:0019898, extrinsic component of membrane;GO:0045053, protein retention in Golgi apparatus	-
TRINITY_DN58018_c1_g1	12.6914	27.1883	-1.09913	2.41e-06	0.000246423	down	COG5043, MRS6, Vacuolar protein sorting-associated protein [Intracellular trafficking and secretion]. 2.74198e-07	KOG1809, KOG1809, KOG1809, Vacuolar protein sorting-associated protein [Intracellular trafficking, secretion, and vesicular transport]. 1.77305e-12	gi|743810111|ref|XP_011018665.1| PREDICTED: uncharacterized protein LOC105121634 [Populus euphratica] 0.0e+00	gi|743810110|ref|XM_011020363.1| PREDICTED: Populus euphratica uncharacterized LOC105121634 (LOC105121634), mRNA 0.0	pfam06101, DUF946, Plant protein of unknown function (DUF946). This family consists of several hypothetical proteins from Arabidopsis thaliana and Oryza sativa. The function of this family is unknown. 6.03822e-07	sp|Q709C8|VP13C_HUMAN Vacuolar protein sorting-associated protein 13C OS=Homo sapiens GN=VPS13C PE=1 SV=1 3.73649e-18	tr|B9MTW0|B9MTW0_POPTR Predicted protein OS=Populus trichocarpa GN=POPTRDRAFT_796379 PE=4 SV=1 0.0e+00	GO:0005737, cytoplasm;GO:0005741, mitochondrial outer membrane;GO:0005829, cytosol;GO:0006623, protein targeting to vacuole;GO:0006895, Golgi to endosome transport;GO:0007005, mitochondrion organization;GO:0019898, extrinsic component of membrane;GO:0045053, protein retention in Golgi apparatus;GO:0070062, extracellular exosome;GO:1905090, negative regulation of parkin-mediated stimulation of mit…	-
TRINITY_DN52244_c1_g1	43.931	13.33	1.72057	7.54e-07	9.69e-05	up	-	-	gi|224107000|ref|XP_002314339.1| hypothetical protein POPTR_0010s00660g [Populus trichocarpa] 3.1e-12	gi|118488664|gb|EF148162.1| Populus trichocarpa clone WS0128_C10 unknown mRNA 0.0	-	sp|O54774|AP3D1_MOUSE AP-3 complex subunit delta-1 OS=Mus musculus GN=Ap3d1 PE=1 SV=1 2.81548e-10	tr|A9PIE1|A9PIE1_POPTR Predicted protein OS=Populus trichocarpa GN=POPTRDRAFT_725575 PE=4 SV=1 1.3e-12	GO:0000139, Golgi membrane;GO:0005654, nucleoplasm;GO:0005765, lysosomal membrane;GO:0005802, trans-Golgi network;GO:0006829, zinc II ion transport;GO:0006886, intracellular protein transport;GO:0008089, anterograde axonal transport;GO:0010008, endosome membrane;GO:0016020, membrane;GO:0016192, vesicle-mediated transport;GO:0019882, antigen processing and presentation;GO:0030123, AP-3 adaptor com…	-
TRINITY_DN51422_c3_g11	6.78976	0.0001	16.0511	0.00162656	0.0337076	up	-	-	-	-	-	-	-	-	-
TRINITY_DN49762_c0_g2	7.03608	2.01798	1.80186	0.00112666	0.0263864	up	COG5540, COG5540, RING-finger-containing ubiquitin ligase [Posttranslational modification, protein turnover, chaperones]. 9.94924e-09	KOG4628, KOG4628, KOG4628, Predicted E3 ubiquitin ligase [Posttranslational modification, protein turnover, chaperones]. 1.46042e-07	gi|566155104|ref|XP_002300529.2| hypothetical protein POPTR_0001s45800g [Populus trichocarpa] 3.8e-103	gi|47900629|gb|AC149298.1| Populus trichocarpa clone Pop1-021H24, complete sequence 0.0	pfam13639, zf-RING_2, Ring finger domain. 2.57301e-09	sp|Q9FGJ6|ATL79_ARATH RING-H2 finger protein ATL79 OS=Arabidopsis thaliana GN=ATL79 PE=2 SV=1 2.29158e-35	tr|B9I0N4|B9I0N4_POPTR Predicted protein OS=Populus trichocarpa GN=POPTRDRAFT_569229 PE=4 SV=1 1.3e-78	GO:0008270, zinc ion binding;GO:0010200, response to chitin;GO:0016021, integral component of membrane;GO:0043161, proteasome-mediated ubiquitin-dependent protein catabolic process;GO:0061630, ubiquitin protein ligase activity	-
TRINITY_DN44737_c1_g4	36.1006	131.655	-1.86667	0.000131229	0.00569217	down	-	-	-	gi|743943022|ref|XM_011017711.1| PREDICTED: Populus euphratica scarecrow-like protein 21 (LOC105119563), mRNA 2.9724e-119	-	-	-	-	-
TRINITY_DN57087_c1_g3	16.3235	44.386	-1.44315	0.00275763	0.0480309	down	PLN03088, PLN03088, SGT1, suppressor of G2 allele of SKP1; Provisional. 2.13623e-14	KOG0548, KOG0548, KOG0548, Molecular co-chaperone STI1 [Posttranslational modification, protein turnover, chaperones]. 4.79374e-54	gi|224071575|ref|XP_002303523.1| stress inducible family protein [Populus trichocarpa] 7.8e-187	gi|566162123|ref|XM_002303487.2| Populus trichocarpa stress inducible family protein (POPTR_0003s11290g) mRNA, complete cds 0.0	-	sp|Q9STH1|HSOP3_ARATH Hsp70-Hsp90 organizing protein 3 OS=Arabidopsis thaliana GN=HOP3 PE=2 SV=1 0.0	tr|B9GVR1|B9GVR1_POPTR Predicted protein OS=Populus trichocarpa GN=POPTRDRAFT_712385 PE=2 SV=1 3.3e-187	GO:0005634, nucleus;GO:0005737, cytoplasm;GO:0009408, response to heat;GO:0009644, response to high light intensity;GO:0010286, heat acclimation;GO:0042542, response to hydrogen peroxide;GO:0051131, chaperone-mediated protein complex assembly;GO:0051879, Hsp90 protein binding;GO:0070678, preprotein binding	-
TRINITY_DN57330_c1_g3	43.1557	119.837	-1.47345	0.000929191	0.0231282	down	COG0661, AarF, Predicted unusual protein kinase [General function prediction only]. 7.31353e-81	KOG1235, KOG1235, KOG1235, Predicted unusual protein kinase [General function prediction only]. 1.89193e-84	gi|566170193|ref|XP_006382920.1| hypothetical protein POPTR_0005s08490g [Populus trichocarpa] 1.9e-286	gi|566170202|ref|XM_006382863.1| Populus trichocarpa hypothetical protein (POPTR_0005s08490g) mRNA, complete cds 0.0	pfam03109, ABC1, ABC1 family. This family includes ABC1 from yeast and AarF from E. coli. These proteins have a nuclear or mitochondrial subcellular location in eukaryotes. The exact molecular functions of these proteins is not clear, however yeast ABC1 suppresses a cytochrome b mRNA translation defect and is essential for the electron transfer in the bc 1 complex and E. coli AarF is required for…	sp|P73627|Y1770_SYNY3 Uncharacterized protein sll1770 OS=Synechocystis sp. (strain PCC 6803 / Kazusa) GN=sll1770 PE=3 SV=1 4.34057e-154	tr|B9HFX0|B9HFX0_POPTR Predicted protein OS=Populus trichocarpa GN=POPTRDRAFT_871134 PE=4 SV=1 9.6e-269	GO:0004672, protein kinase activity;GO:0005524, ATP binding	-
TRINITY_DN53160_c0_g1	168.566	46.0143	1.87316	5.53e-09	1.53e-06	up	-	-	gi|566199591|ref|XP_006375894.1| hypothetical protein POPTR_0013s05380g [Populus trichocarpa] 2.4e-24	gi|566199590|ref|XM_006375832.1| Populus trichocarpa hypothetical protein (POPTR_0013s05380g) mRNA, complete cds 0.0	-	-	tr|B9I5X3|B9I5X3_POPTR Predicted protein OS=Populus trichocarpa GN=POPTRDRAFT_571199 PE=4 SV=1 1.0e-24	GO:0016021, integral component of membrane	-
TRINITY_DN49742_c0_g2	12.2916	5.64225	1.12333	0.00058965	0.016931	up	cd14664, STK_BAK1_like, Catalytic domain of the Serine/Threonine Kinase, BRI1 associated kinase 1 and related STKs. STKs catalyze the transfer of the gamma-phosphoryl group from ATP to serine/threonine residues on protein substrates. This subfamily includes three leucine-rich repeat receptor-like kinases (LRR-RLKs): Arabidopsis thaliana BAK1 and CLAVATA1 (CLV1), and Physcomitrella patens CLL1B cl…	KOG1187, KOG1187, KOG1187, Serine/threonine protein kinase [Signal transduction mechanisms]. 1.56587e-70	gi|566172576|ref|XP_002306714.2| hypothetical protein POPTR_0005s21730g [Populus trichocarpa] 3.0e-187	gi|566172575|ref|XM_002306678.2| Populus trichocarpa hypothetical protein (POPTR_0005s21730g) mRNA, complete cds 0.0	pfam07714, Pkinase_Tyr, Protein tyrosine kinase. 3.83409e-19	sp|Q3EDL4|Y1154_ARATH Probable serine/threonine-protein kinase At1g01540 OS=Arabidopsis thaliana GN=At1g01540 PE=1 SV=2 3.0198e-71	tr|B9H7V2|B9H7V2_POPTR Predicted protein OS=Populus trichocarpa GN=POPTRDRAFT_1078822 PE=3 SV=1 2.4e-170	GO:0004674, protein serine/threonine kinase activity;GO:0005524, ATP binding;GO:0005886, plasma membrane;GO:0016021, integral component of membrane;GO:0046777, protein autophosphorylation	-
TRINITY_DN50510_c1_g1	6.52866	19.0184	-1.54253	0.000598385	0.0171588	down	-	-	gi|743861594|ref|XP_011031156.1| PREDICTED: probable methyltransferase PMT26 isoform X1 [Populus euphratica] 7.1e-109	gi|743827032|ref|XM_011024619.1| PREDICTED: Populus euphratica probable methyltransferase PMT26 (LOC105124553), mRNA 0.0	-	sp|Q8L7V3|PMTQ_ARATH Probable methyltransferase PMT26 OS=Arabidopsis thaliana GN=At5g64030 PE=2 SV=1 1.69108e-37	tr|B9HEX5|B9HEX5_POPTR Predicted protein OS=Populus trichocarpa GN=POPTRDRAFT_718612 PE=4 SV=1 7.1e-95	GO:0000139, Golgi membrane;GO:0005768, endosome;GO:0005774, vacuolar membrane;GO:0005794, Golgi apparatus;GO:0005802, trans-Golgi network;GO:0008757, S-adenosylmethionine-dependent methyltransferase activity;GO:0016021, integral component of membrane;GO:0032259, methylation	-
TRINITY_DN57382_c0_g1	15.3545	56.208	-1.87211	0.0001885	0.00747229	down	-	-	gi|566191679|ref|XP_002316209.2| hypothetical protein POPTR_0010s19560g [Populus trichocarpa] 1.2e-18	gi|566191678|ref|XM_002316173.2| Populus trichocarpa hypothetical protein (POPTR_0010s19560g) mRNA, complete cds 0.0	-	-	tr|B9HSN2|B9HSN2_POPTR Predicted protein OS=Populus trichocarpa GN=POPTRDRAFT_659508 PE=2 SV=1 4.9e-19	GO:0005524, ATP binding;GO:0019538, protein metabolic process	-
TRINITY_DN51312_c1_g2	35.6822	16.2546	1.13435	0.0013809	0.0306158	up	-	-	gi|566189870|ref|XP_006378368.1| hypothetical protein POPTR_0010s09010g [Populus trichocarpa] 4.1e-09	gi|566189869|ref|XM_006378306.1| Populus trichocarpa hypothetical protein (POPTR_0010s09010g) mRNA, complete cds 3.55813e-100	-	-	-	-	-
TRINITY_DN46231_c1_g1	105.16	51.789	1.02188	0.000574226	0.0166219	up	cd14066, STKc_IRAK, Catalytic domain of the Serine/Threonine kinases, Interleukin-1 Receptor Associated Kinases and related STKs. STKs catalyze the transfer of the gamma-phosphoryl group from ATP to serine/threonine residues on protein substrates. IRAKs are involved in Toll-like receptor (TLR) and interleukin-1 (IL-1) signalling pathways, and are thus critical in regulating innate immune response…	KOG1187, KOG1187, KOG1187, Serine/threonine protein kinase [Signal transduction mechanisms]. 1.38138e-45	gi|224059486|ref|XP_002299870.1| Protein kinase capable of phosphorylating tyrosine family protein [Populus trichocarpa] 2.9e-98	gi|566186130|ref|XM_002314142.2| Populus trichocarpa Protein kinase capable of phosphorylating tyrosine family protein (POPTR_0009s03660g) mRNA, complete cds 0.0	pfam00069, Pkinase, Protein kinase domain. 4.27081e-07	sp|Q06548|APK1A_ARATH Protein kinase APK1A, chloroplastic OS=Arabidopsis thaliana GN=APK1A PE=2 SV=1 2.23994e-82	tr|B9GJM9|B9GJM9_POPTR Predicted protein OS=Populus trichocarpa GN=POPTRDRAFT_549167 PE=3 SV=1 1.2e-98	GO:0004674, protein serine/threonine kinase activity;GO:0004713, protein tyrosine kinase activity;GO:0005524, ATP binding;GO:0009507, chloroplast	-
TRINITY_DN51072_c0_g2	6.63107	19.5685	-1.56122	0.00247687	0.0446108	down	pfam00083, Sugar_tr, Sugar (and other) transporter. 3.63827e-12	KOG0254, KOG0254, KOG0254, Predicted transporter (major facilitator superfamily) [General function prediction only]. 6.51419e-18	gi|565374039|ref|XP_006353572.1| PREDICTED: sugar transport protein 14-like [Solanum tuberosum] 5.9e-52	gi|156255260|gb|AC208940.1| Populus trichocarpa clone JGIACSB1085-L05, complete sequence 0.0	pfam00083, Sugar_tr, Sugar (and other) transporter. 7.32874e-13	sp|Q10710|STA_RICCO Sugar carrier protein A OS=Ricinus communis GN=STA PE=2 SV=1 1.49942e-90	tr|M0ZHP5|M0ZHP5_SOLTU Uncharacterized protein OS=Solanum tuberosum GN=PGSC0003DMG400000367 PE=3 SV=1 2.5e-52	GO:0008643, carbohydrate transport;GO:0015293, symporter activity;GO:0016021, integral component of membrane;GO:0022891, substrate-specific transmembrane transporter activity	-
TRINITY_DN51072_c0_g1	18.8086	55.9575	-1.57294	3.2e-05	0.00191245	down	cd05243, SDR_a5, atypical (a) SDRs, subgroup 5. This subgroup contains atypical SDRs, some of which are identified as putative NAD(P)-dependent epimerases, one as a putative NAD-dependent epimerase/dehydratase. Atypical SDRs are distinct from classical SDRs. Members of this subgroup have a glycine-rich NAD(P)-binding motif that is very similar to the extended SDRs, GXXGXXG, and binds NADP. Genera…	KOG1203, KOG1203, KOG1203, Predicted dehydrogenase [Carbohydrate transport and metabolism]. 2.44176e-17	gi|743904025|ref|XP_011045377.1| PREDICTED: protein TIC 62, chloroplastic [Populus euphratica] 1.5e-177	gi|566151058|ref|XM_002298266.2| Populus trichocarpa hypothetical protein (POPTR_0001s26070g) mRNA, complete cds 0.0	-	sp|Q8GW61|STP14_ARATH Sugar transport protein 14 OS=Arabidopsis thaliana GN=STP14 PE=2 SV=2 2.90272e-37	tr|B9GIF6|B9GIF6_POPTR Predicted protein OS=Populus trichocarpa GN=POPTRDRAFT_846814 PE=4 SV=1 5.0e-143	GO:0005351, sugar:proton symporter activity;GO:0005355, glucose transmembrane transporter activity;GO:0005886, plasma membrane;GO:0005887, integral component of plasma membrane;GO:0046323, glucose import	-
TRINITY_DN48719_c2_g1	58.8493	185.766	-1.65839	0.00101825	0.0246394	down	PLN03222, PLN03222, rapid alkalinization factor 23-like protein; Provisional. 9.78571e-40	-	gi|28628203|gb|AAO27366.1| rapid alkalinization factor 1 precursor [Populus trichocarpa x Populus deltoides] 3.9e-62	gi|28628202|gb|AY172330.1| Populus balsamifera subsp. trichocarpa x Populus deltoides rapid alkalinization factor 1 precursor (RALF1) mRNA, complete cds 0.0	pfam05498, RALF, Rapid ALkalinization Factor (RALF). RALF, a 5-kDa ubiquitous polypeptide in plants, arrests root growth and development. 1.18543e-24	sp|Q8L9P8|RLF33_ARATH Protein RALF-like 33 OS=Arabidopsis thaliana GN=RALFL33 PE=2 SV=1 4.75887e-40	tr|Q84UC9|Q84UC9_9ROSI Rapid alkalinization factor 1 OS=Populus trichocarpa x Populus deltoides GN=RALF1 PE=2 SV=1 1.6e-62	GO:0004871, signal transducer activity;GO:0005179, hormone activity;GO:0005622, intracellular;GO:0007267, cell-cell signaling;GO:0009505, plant-type cell wall;GO:0009506, plasmodesma;GO:0019722, calcium-mediated signaling;GO:0048046, apoplast	-
TRINITY_DN46401_c3_g1	161.132	58.2706	1.4674	4.17e-05	0.00234054	up	-	-	gi|118486749|gb|ABK95210.1| unknown [Populus trichocarpa] 1.2e-25	gi|166157595|gb|AC216943.1| Populus trichocarpa clone POP051-N24, complete sequence 0.0	-	-	tr|A9PFQ7|A9PFQ7_POPTR Putative uncharacterized protein OS=Populus trichocarpa PE=2 SV=1 5.1e-26	GO:0030001, metal ion transport;GO:0046872, metal ion binding	-
TRINITY_DN46401_c3_g2	39.6567	15.7354	1.33355	6.11e-06	0.000521289	up	-	-	gi|118486152|gb|ABK94919.1| unknown [Populus trichocarpa] 2.4e-18	gi|118486151|gb|EF146876.1| Populus trichocarpa clone WS0121_H04 unknown mRNA 0.0	-	-	tr|A9PEW6|A9PEW6_POPTR Putative uncharacterized protein OS=Populus trichocarpa PE=2 SV=1 1.0e-18	GO:0030001, metal ion transport;GO:0046872, metal ion binding	-
TRINITY_DN51565_c0_g1	4.24823	12.3003	-1.53376	0.00091131	0.0228025	down	PLN02829, PLN02829, Probable galacturonosyltransferase. 6.99871e-23	-	gi|566207889|ref|XP_006373556.1| hypothetical protein POPTR_0016s00360g [Populus trichocarpa] 2.3e-23	gi|566207888|ref|XM_006373494.1| Populus trichocarpa hypothetical protein (POPTR_0016s00360g) mRNA, complete cds 0.0	-	sp|Q93ZX7|GAUT4_ARATH Probable galacturonosyltransferase 4 OS=Arabidopsis thaliana GN=GAUT4 PE=2 SV=1 4.75227e-20	tr|B9N3W3|B9N3W3_POPTR Glycosyltransferase, CAZy family GT8 OS=Populus trichocarpa GN=POPTRDRAFT_582333 PE=4 SV=1 9.6e-24	GO:0000139, Golgi membrane;GO:0005794, Golgi apparatus;GO:0016021, integral component of membrane;GO:0045489, pectin biosynthetic process;GO:0047262, polygalacturonate 4-alpha-galacturonosyltransferase activity;GO:0071555, cell wall organization	-
TRINITY_DN41368_c0_g1	1.27396	5.85204	-2.19962	0.00276779	0.0481294	down	cd06407, PB1_NLP, A PB1 domain is present in NIN like proteins (NLP), a key enzyme in a process of establishment of symbiosis betweeen legumes and nitrogen fixing bacteria (Rhizobium). The PB1 domain is a modular domain mediating specific protein-protein interaction which play a role in many critical cell processes like osteoclastogenesis, angiogenesis, early cardiovascular development, and cell …	-	gi|224072246|ref|XP_002303671.1| RWP-RK domain-containing family protein [Populus trichocarpa] 3.9e-84	gi|566162607|ref|XM_002303635.2| Populus trichocarpa RWP-RK domain-containing family protein (POPTR_0003s14300g) mRNA, complete cds 0.0	-	sp|Q84TH9|NLP7_ARATH Protein NLP7 OS=Arabidopsis thaliana GN=NLP7 PE=1 SV=2 1.14985e-44	tr|B9GXT6|B9GXT6_POPTR Predicted protein OS=Populus trichocarpa GN=POPTRDRAFT_1074191 PE=4 SV=1 1.6e-84	GO:0003677, DNA binding;GO:0003700, transcription factor activity, sequence-specific DNA binding;GO:0005634, nucleus;GO:0006351, transcription, DNA-templated;GO:0009414, response to water deprivation;GO:0010118, stomatal movement;GO:0010167, response to nitrate;GO:0042128, nitrate assimilation	-
TRINITY_DN41368_c0_g2	1.31444	5.2662	-2.00231	0.00262397	0.046431	down	pfam02042, RWP-RK, RWP-RK domain. This domain is named RWP-RK after a conserved motif at the C terminus of the presumed domain. The domain is found in algal minus dominance proteins as well as plant proteins involved in nitrogen-controlled development. 1.44259e-11	-	gi|743825210|ref|XP_011022460.1| PREDICTED: protein NLP7-like isoform X1 [Populus euphratica] 7.4e-128	gi|743825213|ref|XM_011024159.1| PREDICTED: Populus euphratica protein NLP7-like (LOC105124233), transcript variant X2, mRNA 0.0	pfam02042, RWP-RK, RWP-RK domain. This domain is named RWP-RK after a conserved motif at the C terminus of the presumed domain. The domain is found in algal minus dominance proteins as well as plant proteins involved in nitrogen-controlled development. 3.44647e-12	sp|Q84TH9|NLP7_ARATH Protein NLP7 OS=Arabidopsis thaliana GN=NLP7 PE=1 SV=2 1.6873e-50	tr|B9GXT6|B9GXT6_POPTR Predicted protein OS=Populus trichocarpa GN=POPTRDRAFT_1074191 PE=4 SV=1 8.7e-115	GO:0003677, DNA binding;GO:0003700, transcription factor activity, sequence-specific DNA binding;GO:0005634, nucleus;GO:0006351, transcription, DNA-templated;GO:0009414, response to water deprivation;GO:0010118, stomatal movement;GO:0010167, response to nitrate;GO:0042128, nitrate assimilation	-
TRINITY_DN55786_c0_g1	18.6165	55.9194	-1.58676	0.000482102	0.0147007	down	PLN02703, PLN02703, beta-fructofuranosidase. 3.34748e-158	-	gi|566192515|ref|XP_002316508.2| hypothetical protein POPTR_0010s24250g [Populus trichocarpa] 1.4e-153	gi|566192514|ref|XM_002316472.2| Populus trichocarpa hypothetical protein (POPTR_0010s24250g) mRNA, complete cds 0.0	pfam12899, Glyco_hydro_100, Alkaline and neutral invertase. This is a family of bacterial and plant alkaline and neutral invertases, EC:3.2.1.26, previously known as Invertase_neut pfam04853. 1.76762e-107	sp|Q9FK88|INVE_ARATH Alkaline/neutral invertase E, chloroplastic OS=Arabidopsis thaliana GN=INVE PE=1 SV=1 3.63325e-157	tr|B9HVZ6|B9HVZ6_POPTR Predicted protein (Fragment) OS=Populus trichocarpa GN=POPTRDRAFT_228815 PE=4 SV=1 6.1e-154	GO:0004575, sucrose alpha-glucosidase activity;GO:0005982, starch metabolic process;GO:0005987, sucrose catabolic process;GO:0009507, chloroplast;GO:0033926, glycopeptide alpha-N-acetylgalactosaminidase activity;GO:0048825, cotyledon development	-
TRINITY_DN42629_c0_g1	18.2855	0.629109	4.86124	1.12e-16	2.82e-13	up	-	-	gi|743914041|ref|XP_011000943.1| PREDICTED: uncharacterized protein LOC105108358 [Populus euphratica] 3.8e-75	gi|743914040|ref|XM_011002641.1| PREDICTED: Populus euphratica uncharacterized LOC105108358 (LOC105108358), transcript variant X1, mRNA 0.0	-	-	tr|B9GGN5|B9GGN5_POPTR Predicted protein OS=Populus trichocarpa GN=POPTRDRAFT_751865 PE=4 SV=1 9.0e-63	-	-
TRINITY_DN46286_c0_g3	18.9384	7.02205	1.43135	0.000454587	0.0140518	up	-	KOG3298, KOG3298, KOG3298, DNA-directed RNA polymerase subunit E' [Transcription]. 3.01581e-07	gi|743858892|ref|XP_011030576.1| PREDICTED: DNA-directed RNA polymerase V subunit 7-like [Populus euphratica] 1.0e-46	gi|566189831|ref|XM_002314617.2| Populus trichocarpa hypothetical protein (POPTR_0010s08780g) mRNA, complete cds 0.0	-	sp|A6QRA1|NRPE7_ARATH DNA-directed RNA polymerase V subunit 7 OS=Arabidopsis thaliana GN=NRPE7 PE=1 SV=1 8.2798e-22	tr|B9HUM8|B9HUM8_POPTR Predicted protein OS=Populus trichocarpa GN=POPTRDRAFT_658420 PE=4 SV=1 4.2e-47	GO:0000419, DNA-directed RNA polymerase V complex;GO:0000428, DNA-directed RNA polymerase complex;GO:0003697, single-stranded DNA binding;GO:0003727, single-stranded RNA binding;GO:0003899, DNA-directed 5'-3' RNA polymerase activity;GO:0006351, transcription, DNA-templated	-
TRINITY_DN46286_c0_g5	9.62037	4.51164	1.09244	0.00215728	0.0403483	up	TIGR00448, DNA-directed_RNA_polymerase_III_subunit_RPC8, DNA-directed RNA polymerase (rpoE), archaeal and eukaryotic form. This family seems to be confined to the archea and eukaryotic taxa and are quite dissimilar to E.coli rpoE. [Transcription, DNA-dependent RNA polymerase]. 2.81206e-06	KOG3298, KOG3298, KOG3298, DNA-directed RNA polymerase subunit E' [Transcription]. 2.05377e-11	gi|224107919|ref|XP_002314653.1| hypothetical protein POPTR_0010s08780g [Populus trichocarpa] 1.9e-51	gi|566189831|ref|XM_002314617.2| Populus trichocarpa hypothetical protein (POPTR_0010s08780g) mRNA, complete cds 0.0	-	sp|A6QRA1|NRPE7_ARATH DNA-directed RNA polymerase V subunit 7 OS=Arabidopsis thaliana GN=NRPE7 PE=1 SV=1 1.72058e-24	tr|B9HUM8|B9HUM8_POPTR Predicted protein OS=Populus trichocarpa GN=POPTRDRAFT_658420 PE=4 SV=1 7.8e-52	GO:0000419, DNA-directed RNA polymerase V complex;GO:0000428, DNA-directed RNA polymerase complex;GO:0003697, single-stranded DNA binding;GO:0003727, single-stranded RNA binding;GO:0003899, DNA-directed 5'-3' RNA polymerase activity;GO:0006351, transcription, DNA-templated	-
TRINITY_DN43798_c0_g1	0.442582	7.96072	-4.16888	4.04e-05	0.00228337	down	-	-	gi|566186870|ref|XP_002313236.2| hypothetical protein POPTR_0009s07920g [Populus trichocarpa] 4.2e-13	gi|157311800|gb|AC210342.1| Populus trichocarpa clone POP091-B06, complete sequence 0.0	-	-	-	-	-
TRINITY_DN55054_c2_g1	48.1276	196.196	-2.02736	6.09e-06	0.00052006	down	PLN02436, PLN02436, cellulose synthase A. 2.14643e-157	-	gi|37725363|gb|AAO25581.1| cellulose synthase [Populus tremuloides] 7.2e-146	gi|37725362|gb|AY162180.1| Populus tremuloides cellulose synthase (CesA7) mRNA, complete cds 0.0	pfam03552, Cellulose_synt, Cellulose synthase. Cellulose, an aggregate of unbranched polymers of beta-1,4-linked glucose residues, is the major component of wood and thus paper, and is synthesized by plants, most algae, some bacteria and fungi, and even some animals. The genes that synthesize cellulose in higher plants differ greatly from the well-characterized genes found in Acetobacter and Agro…	sp|Q94JQ6|CESA6_ARATH Cellulose synthase A catalytic subunit 6 [UDP-forming] OS=Arabidopsis thaliana GN=CESA6 PE=1 SV=2 1.1985e-152	tr|Q6YBV3|Q6YBV3_POPTM Cellulose synthase OS=Populus tremuloides GN=CesA7 PE=2 SV=1 3.0e-146	GO:0005794, Golgi apparatus;GO:0005886, plasma membrane;GO:0008270, zinc ion binding;GO:0009833, plant-type primary cell wall biogenesis;GO:0010330, cellulose synthase complex;GO:0016020, membrane;GO:0016021, integral component of membrane;GO:0016049, cell growth;GO:0016760, cellulose synthase (UDP-forming) activity;GO:0030244, cellulose biosynthetic process;GO:0043622, cortical microtubule organ…	-
TRINITY_DN54506_c0_g2	27.527	12.204	1.1735	0.000335895	0.0112924	up	-	-	-	gi|743841686|ref|XM_011028221.1| PREDICTED: Populus euphratica uncharacterized LOC105127101 (LOC105127101), transcript variant X1, mRNA 0.0	-	-	-	-	-
TRINITY_DN48608_c0_g1	29.2381	152.483	-2.38272	2.08e-07	3.31e-05	down	-	-	-	gi|566214454|ref|XM_006371850.1| Populus trichocarpa hypothetical protein (POPTR_0018s06150g) mRNA, complete cds 0.0	-	-	-	-	-
TRINITY_DN48608_c0_g2	1.36913	7.55265	-2.46372	0.000217145	0.00821237	down	-	-	gi|566259818|ref|XP_006389464.1| hypothetical protein POPTR_0024s00730g [Populus trichocarpa] 1.5e-50	gi|164519400|gb|AC216451.1| Populus trichocarpa clone POP015-O07, complete sequence 0.0	-	sp|Q9LHF1|LRX4_ARATH Leucine-rich repeat extensin-like protein 4 OS=Arabidopsis thaliana GN=LRX4 PE=2 SV=1 2.0101e-44	tr|B9N8Z7|B9N8Z7_POPTR Predicted protein (Fragment) OS=Populus trichocarpa GN=POPTRDRAFT_932517 PE=4 SV=1 6.3e-51	GO:0005199, structural constituent of cell wall;GO:0005576, extracellular region;GO:0005618, cell wall;GO:0009505, plant-type cell wall;GO:0009506, plasmodesma;GO:0071555, cell wall organization	-
TRINITY_DN48608_c0_g4	154.789	938.374	-2.59986	7.82e-10	2.86e-07	down	-	-	-	gi|566214454|ref|XM_006371850.1| Populus trichocarpa hypothetical protein (POPTR_0018s06150g) mRNA, complete cds 2.01629e-95	-	-	-	-	-
TRINITY_DN47290_c0_g2	180.128	89.4608	1.00969	0.000604282	0.0172408	up	PLN02255, PLN02255, H(+) -translocating inorganic pyrophosphatase. 2.97699e-42	-	gi|743806278|ref|XP_011017877.1| PREDICTED: pyrophosphate-energized vacuolar membrane proton pump-like [Populus euphratica] 1.2e-35	gi|156627641|gb|AC209224.1| Populus trichocarpa chromosome POP064-N07, complete sequence 0.0	pfam03030, H_PPase, Inorganic H+ pyrophosphatase. The H+ pyrophosphatase is an transmembrane proton pump involved in establishing the H+ electrochemical potential difference between the vacuole lumen and the cell cytosol. Vacuolar-type H(+)-translocating inorganic pyrophosphatases have long been considered to be restricted to plants and to a few species of photo-trophic bacteria. However, in rece…	sp|P21616|AVP_VIGRR Pyrophosphate-energized vacuolar membrane proton pump OS=Vigna radiata var. radiata PE=1 SV=4 4.05644e-42	tr|A9PFH8|A9PFH8_POPTR Vacuolar H+-translocating inorganic pyrophosphatase OS=Populus trichocarpa GN=POPTRDRAFT_578868 PE=2 SV=1 4.9e-36	GO:0004427, inorganic diphosphatase activity;GO:0005774, vacuolar membrane;GO:0009678, hydrogen-translocating pyrophosphatase activity;GO:0015992, proton transport;GO:0016021, integral component of membrane;GO:0046872, metal ion binding	-
TRINITY_DN46578_c0_g2	3812.48	1522.71	1.32409	1.03e-06	0.000125476	up	PLN00048, PLN00048, photosystem I light harvesting chlorophyll a/b binding protein 3; Provisional. 6.3402e-118	-	gi|118489937|gb|ABK96765.1| unknown [Populus trichocarpa x Populus deltoides] 1.3e-110	gi|566204717|ref|XM_002321182.2| Populus trichocarpa chlorophyll A-B binding family protein (POPTR_0014s17070g) mRNA, complete cds 0.0	-	sp|P27522|CB13_SOLLC Chlorophyll a-b binding protein 8, chloroplastic OS=Solanum lycopersicum GN=CAB8 PE=3 SV=1 2.40155e-122	tr|A9PK62|A9PK62_9ROSI Putative uncharacterized protein OS=Populus trichocarpa x Populus deltoides PE=2 SV=1 5.3e-111	GO:0009416, response to light stimulus;GO:0009522, photosystem I;GO:0009523, photosystem II;GO:0009535, chloroplast thylakoid membrane;GO:0009765, photosynthesis, light harvesting;GO:0009768, photosynthesis, light harvesting in photosystem I;GO:0009941, chloroplast envelope;GO:0010287, plastoglobule;GO:0016021, integral component of membrane;GO:0016168, chlorophyll binding;GO:0018298, protein-chr…	K08909-ko00196 Photosynthesis - antenna proteins
TRINITY_DN58059_c0_g1	31.7051	80.5766	-1.34564	0.00165411	0.0339319	down	pfam01039, Carboxyl_trans, Carboxyl transferase domain. All of the members in this family are biotin dependent carboxylases. The carboxyl transferase domain carries out the following reaction; transcarboxylation from biotin to an acceptor molecule. There are two recognized types of carboxyl transferase. One of them uses acyl-CoA and the other uses 2-oxoacid as the acceptor molecule of carbon diox…	KOG0368, KOG0368, KOG0368, Acetyl-CoA carboxylase [Lipid transport and metabolism]. 0.0	gi|743846201|ref|XP_011027682.1| PREDICTED: acetyl-CoA carboxylase 1-like [Populus euphratica] 0.0e+00	gi|566171761|ref|XM_006383425.1| Populus trichocarpa hypothetical protein (POPTR_0005s16540g) mRNA, complete cds 0.0	pfam01039, Carboxyl_trans, Carboxyl transferase domain. All of the members in this family are biotin dependent carboxylases. The carboxyl transferase domain carries out the following reaction; transcarboxylation from biotin to an acceptor molecule. There are two recognized types of carboxyl transferase. One of them uses acyl-CoA and the other uses 2-oxoacid as the acceptor molecule of carbon diox…	sp|Q38970|ACC1_ARATH Acetyl-CoA carboxylase 1 OS=Arabidopsis thaliana GN=ACC1 PE=1 SV=1 0.0	tr|B9GUK0|B9GUK0_POPTR Predicted protein OS=Populus trichocarpa GN=POPTRDRAFT_830215 PE=4 SV=1 0.0e+00	GO:0003989, acetyl-CoA carboxylase activity;GO:0004075, biotin carboxylase activity;GO:0005524, ATP binding;GO:0005829, cytosol;GO:0005886, plasma membrane;GO:0006633, fatty acid biosynthetic process;GO:0009735, response to cytokinin;GO:0009793, embryo development ending in seed dormancy;GO:0009933, meristem structural organization;GO:0010072, primary shoot apical meristem specification;GO:003049…	-
TRINITY_DN58059_c0_g2	24.0424	80.573	-1.74471	0.00286197	0.0492668	down	-	KOG0368, KOG0368, KOG0368, Acetyl-CoA carboxylase [Lipid transport and metabolism]. 4.55629e-18	gi|566157090|ref|XP_006386394.1| hypothetical protein POPTR_0002s09330g [Populus trichocarpa] 5.8e-51	gi|566157091|ref|XM_002302241.2| Populus trichocarpa acetyl-CoA carboxylase family protein (POPTR_0002s09330g) mRNA, complete cds 2.46843e-149	-	sp|F4I1L3|ACC2_ARATH Acetyl-CoA carboxylase 2 OS=Arabidopsis thaliana GN=ACC2 PE=2 SV=1 1.86211e-41	tr|B9GUK0|B9GUK0_POPTR Predicted protein OS=Populus trichocarpa GN=POPTRDRAFT_830215 PE=4 SV=1 2.4e-51	GO:0003989, acetyl-CoA carboxylase activity;GO:0004075, biotin carboxylase activity;GO:0005524, ATP binding;GO:0005829, cytosol;GO:0006633, fatty acid biosynthetic process;GO:0046872, metal ion binding;GO:2001295, malonyl-CoA biosynthetic process	-
TRINITY_DN41461_c0_g1	5.198	1.76183	1.56088	0.000343758	0.0114707	up	-	-	-	gi|158420593|gb|AC212928.1| Populus trichocarpa clone POP043-P14, complete sequence 0.0	-	-	-	-	-
TRINITY_DN45924_c0_g1	1.53105	7.08047	-2.20933	0.0017816	0.0357255	down	-	-	gi|566164439|ref|XP_006383936.1| hypothetical protein POPTR_0004s01915g [Populus trichocarpa] 2.5e-14	gi|743885923|ref|XR_844082.1| PREDICTED: Populus euphratica uncharacterized LOC105134839 (LOC105134839), ncRNA 0.0	-	-	-	-	-
TRINITY_DN47133_c0_g1	4.95532	13.8156	-1.47925	0.00164976	0.0338751	down	-	-	gi|566254942|ref|XP_006387635.1| hypothetical protein POPTR_0743s002102g, partial [Populus trichocarpa] 2.0e-12	gi|743852611|ref|XM_011031009.1| PREDICTED: Populus euphratica puromycin-sensitive aminopeptidase-like (LOC105129076), transcript variant X2, mRNA 3.71e-171	-	-	-	-	-
TRINITY_DN49242_c0_g1	12.4203	89.245	-2.84507	2.04e-13	2.18e-10	down	pfam04674, Phi_1, Phosphate-induced protein 1 conserved region. Family of conserved plant proteins. Conserved region identified in a phosphate-induced protein of unknown function. 5.37365e-61	-	gi|743895332|ref|XP_011040935.1| PREDICTED: protein EXORDIUM-like 5 [Populus euphratica] 7.9e-185	gi|566167850|ref|XM_006384790.1| Populus trichocarpa hypothetical protein (POPTR_0004s21650g) mRNA, complete cds 0.0	pfam04674, Phi_1, Phosphate-induced protein 1 conserved region. Family of conserved plant proteins. Conserved region identified in a phosphate-induced protein of unknown function. 1.28381e-61	sp|Q9SII5|EXOL5_ARATH Protein EXORDIUM-like 5 OS=Arabidopsis thaliana GN=EXL5 PE=2 SV=1 1.40218e-166	tr|B9MZ03|B9MZ03_POPTR Predicted protein OS=Populus trichocarpa GN=POPTRDRAFT_836707 PE=4 SV=1 1.7e-160	GO:0005615, extracellular space;GO:0048046, apoplast	-
TRINITY_DN49242_c0_g2	18.6212	123.826	-2.73329	5.52e-08	1.07e-05	down	pfam04674, Phi_1, Phosphate-induced protein 1 conserved region. Family of conserved plant proteins. Conserved region identified in a phosphate-induced protein of unknown function. 1.73206e-68	-	gi|566188388|ref|XP_002312800.2| hypothetical protein POPTR_0009s16900g [Populus trichocarpa] 3.6e-191	gi|566188387|ref|XM_002312764.2| Populus trichocarpa hypothetical protein (POPTR_0009s16900g) mRNA, complete cds 0.0	pfam04674, Phi_1, Phosphate-induced protein 1 conserved region. Family of conserved plant proteins. Conserved region identified in a phosphate-induced protein of unknown function. 4.13804e-69	sp|Q9SII5|EXOL5_ARATH Protein EXORDIUM-like 5 OS=Arabidopsis thaliana GN=EXL5 PE=2 SV=1 1.56513e-175	tr|B9SMC4|B9SMC4_RICCO Putative uncharacterized protein OS=Ricinus communis GN=RCOM_0600270 PE=4 SV=1 2.0e-164	GO:0005615, extracellular space;GO:0048046, apoplast	-
TRINITY_DN46698_c0_g2	4.3604	50.1891	-3.52484	2.08e-09	6.56e-07	down	smart00332, PP2Cc, Serine/threonine phosphatases, family 2C, catalytic domain. The protein architecture and deduced catalytic mechanism of PP2C phosphatases are similar to the PP1, PP2A, PP2B family of protein Ser/Thr phosphatases, with which PP2C shares no sequence similarity. 2.30314e-45	KOG0698, KOG0698, KOG0698, Serine/threonine protein phosphatase [Signal transduction mechanisms]. 4.69517e-47	gi|743851634|ref|XP_011029045.1| PREDICTED: probable protein phosphatase 2C 58 [Populus euphratica] 2.0e-100	gi|743851633|ref|XM_011030743.1| PREDICTED: Populus euphratica probable protein phosphatase 2C 58 (LOC105128896), mRNA 0.0	pfam00481, PP2C, Protein phosphatase 2C. Protein phosphatase 2C is a Mn++ or Mg++ dependent protein serine/threonine phosphatase. 1.24223e-32	sp|Q93YW5|P2C58_ARATH Probable protein phosphatase 2C 58 OS=Arabidopsis thaliana GN=At4g28400 PE=2 SV=1 5.55374e-102	tr|B9MYF6|B9MYF6_POPTR Predicted protein OS=Populus trichocarpa GN=POPTRDRAFT_594652 PE=4 SV=1 1.1e-100	GO:0004722, protein serine/threonine phosphatase activity;GO:0046872, metal ion binding	-
TRINITY_DN47507_c0_g1	4.07931	13.9672	-1.77564	0.000298492	0.0104064	down	-	-	gi|743836317|ref|XP_011025241.1| PREDICTED: uncharacterized protein LOC105126164 [Populus euphratica] 3.1e-47	gi|743836316|ref|XM_011026939.1| PREDICTED: Populus euphratica uncharacterized LOC105126164 (LOC105126164), transcript variant X1, mRNA 0.0	-	-	tr|A9P969|A9P969_POPTR Predicted protein OS=Populus trichocarpa GN=POPTRDRAFT_829335 PE=2 SV=1 4.6e-45	-	-
TRINITY_DN48892_c1_g1	8.92064	31.248	-1.80855	0.00216202	0.0404018	down	cd14066, STKc_IRAK, Catalytic domain of the Serine/Threonine kinases, Interleukin-1 Receptor Associated Kinases and related STKs. STKs catalyze the transfer of the gamma-phosphoryl group from ATP to serine/threonine residues on protein substrates. IRAKs are involved in Toll-like receptor (TLR) and interleukin-1 (IL-1) signalling pathways, and are thus critical in regulating innate immune response…	KOG1187, KOG1187, KOG1187, Serine/threonine protein kinase [Signal transduction mechanisms]. 4.88604e-84	gi|566176387|ref|XP_006381619.1| kinase family protein [Populus trichocarpa] 6.6e-130	gi|566176386|ref|XM_006381557.1| Populus trichocarpa kinase family protein (POPTR_0006s14380g) mRNA, complete cds 0.0	pfam07714, Pkinase_Tyr, Protein tyrosine kinase. 1.25155e-17	sp|Q9CAH1|Y1725_ARATH Putative receptor-like protein kinase At1g72540 OS=Arabidopsis thaliana GN=At1g72540 PE=2 SV=1 1.32992e-130	tr|B9MSZ4|B9MSZ4_POPTR Predicted protein OS=Populus trichocarpa GN=POPTRDRAFT_1108887 PE=4 SV=1 2.8e-130	GO:0004674, protein serine/threonine kinase activity;GO:0005524, ATP binding	-
TRINITY_DN55691_c3_g1	21.3227	72.3566	-1.76273	0.000634625	0.0177487	down	cd12345, RRM2_SECp43_like, RNA recognition motif 2 in tRNA selenocysteine-associated protein 1 (SECp43) and similar proteins. This subfamily corresponds to the RRM2 in tRNA selenocysteine-associated protein 1 (SECp43), yeast negative growth regulatory protein NGR1 (RBP1), yeast protein NAM8, and similar proteins. SECp43 is an RNA-binding protein associated specifically with eukaryotic selenocyste…	KOG0131, KOG0131, KOG0131, Splicing factor 3b, subunit 4 [RNA processing and modification]. 3.20769e-21	gi|566187370|ref|XP_002313840.2| RNA-binding protein 47 [Populus trichocarpa] 6.1e-111	gi|566187369|ref|XM_002313804.2| Populus trichocarpa RNA-binding protein 47 (POPTR_0009s10820g) mRNA, complete cds 0.0	pfam00076, RRM_1, RNA recognition motif. (a.k.a. RRM, RBD, or RNP domain). The RRM motif is probably diagnostic of an RNA binding protein. RRMs are found in a variety of RNA binding proteins, including various hnRNP proteins, proteins implicated in regulation of alternative splicing, and protein components of snRNPs. The motif also appears in a few single stranded DNA binding proteins. The RRM st…	sp|Q9LEB3|RBP47_NICPL Polyadenylate-binding protein RBP47 OS=Nicotiana plumbaginifolia GN=RBP47 PE=1 SV=1 8.5765e-108	tr|B9HRX8|B9HRX8_POPTR Predicted protein OS=Populus trichocarpa GN=POPTRDRAFT_767539 PE=4 SV=1 2.6e-111	GO:0000166, nucleotide binding;GO:0003676, nucleic acid binding;GO:0005634, nucleus;GO:0006397, mRNA processing;GO:0008143, poly(A) binding;GO:0010494, cytoplasmic stress granule;GO:0034605, cellular response to heat	-
TRINITY_DN57002_c0_g1	29.6727	12.5334	1.24336	0.000197141	0.00772397	up	PLN03162, PLN03162, golden-2 like transcription factor; Provisional. 1.14733e-11	-	gi|566179020|ref|XP_002310413.2| hypothetical protein POPTR_0007s01230g [Populus trichocarpa] 1.0e-39	gi|566179019|ref|XM_002310377.2| Populus trichocarpa hypothetical protein (POPTR_0007s01230g) mRNA, complete cds 0.0	-	sp|Q9SIV3|GLK1_ARATH Transcription activator GLK1 OS=Arabidopsis thaliana GN=GLK1 PE=1 SV=2 2.3013e-09	tr|M5XAQ3|M5XAQ3_PRUPE Uncharacterized protein OS=Prunus persica GN=PRUPE_ppa014599mg PE=4 SV=1 2.0e-29	GO:0003677, DNA binding;GO:0005634, nucleus;GO:0006351, transcription, DNA-templated;GO:0006355, regulation of transcription, DNA-templated;GO:1900056, negative regulation of leaf senescence	-
TRINITY_DN49121_c0_g1	32.3664	77.97	-1.26842	0.00230504	0.0423789	down	COG0661, AarF, Predicted unusual protein kinase [General function prediction only]. 1.44897e-38	KOG1235, KOG1235, KOG1235, Predicted unusual protein kinase [General function prediction only]. 1.0734e-34	gi|224053434|ref|XP_002297817.1| ABC1 family protein [Populus trichocarpa] 5.3e-216	gi|566148932|ref|XM_006368839.1| Populus trichocarpa hypothetical protein (POPTR_0001s14410g) mRNA, complete cds 0.0	pfam03109, ABC1, ABC1 family. This family includes ABC1 from yeast and AarF from E. coli. These proteins have a nuclear or mitochondrial subcellular location in eukaryotes. The exact molecular functions of these proteins is not clear, however yeast ABC1 suppresses a cytochrome b mRNA translation defect and is essential for the electron transfer in the bc 1 complex and E. coli AarF is required for…	sp|Q55680|Y005_SYNY3 Uncharacterized protein sll0005 OS=Synechocystis sp. (strain PCC 6803 / Kazusa) GN=sll0005 PE=3 SV=1 2.11998e-66	tr|B9GMF4|B9GMF4_POPTR Predicted protein OS=Populus trichocarpa GN=POPTRDRAFT_547970 PE=4 SV=1 2.2e-216	GO:0004672, protein kinase activity;GO:0005524, ATP binding;GO:0009507, chloroplast	-
TRINITY_DN52912_c0_g1	30.5029	77.0246	-1.33637	0.00268571	0.0472394	down	PLN02629, PLN02629, powdery mildew resistance 5. 4.1429e-97	-	gi|823171231|ref|XP_012484735.1| PREDICTED: protein trichome birefringence-like 38 isoform X1 [Gossypium raimondii] 1.3e-118	gi|743905041|ref|XM_011047609.1| PREDICTED: Populus euphratica protein trichome birefringence-like 38 (LOC105140686), mRNA 0.0	pfam13839, PC-Esterase, GDSL/SGNH-like Acyl-Esterase family found in Pmr5 and Cas1p. The PC-Esterase family is comprised of Cas1p, the Homo sapiens C7orf58, Arabidopsis thaliana PMR5 and a group of plant freezing resistance/coldacclimatization proteins typified by Arabidopsis thaliana ESKIMO1, animal FAM55D proteins, and animal FAM113 proteins. The PC-Esterase family has features that are both si…	sp|Q8VY22|TBL38_ARATH Protein trichome birefringence-like 38 OS=Arabidopsis thaliana GN=TBL38 PE=2 SV=1 8.18844e-147	tr|B9S988|B9S988_RICCO Putative uncharacterized protein OS=Ricinus communis GN=RCOM_1014620 PE=4 SV=1 2.3e-109	GO:0005794, Golgi apparatus;GO:0016021, integral component of membrane;GO:0016413, O-acetyltransferase activity;GO:0071554, cell wall organization or biogenesis	-
TRINITY_DN46874_c0_g1	3.73664	24.0098	-2.68381	0.00017074	0.0069221	down	PTZ00183, PTZ00183, centrin; Provisional. 2.90675e-11	KOG0028, KOG0028, KOG0028, Ca2+-binding protein (centrin/caltractin), EF-Hand superfamily protein [Cytoskeleton, Cell cycle control, cell division, chromosome partitioning]. 5.2348e-13	gi|224124692|ref|XP_002319397.1| hypothetical protein POPTR_0013s14730g [Populus trichocarpa] 2.0e-59	gi|566201369|ref|XM_002319361.2| Populus trichocarpa hypothetical protein (POPTR_0013s14730g) mRNA, complete cds 0.0	pfam13833, EF-hand_8, EF-hand domain pair. 1.32442e-06	sp|Q9LSQ6|PBP1_ARATH Calcium-binding protein PBP1 OS=Arabidopsis thaliana GN=PBP1 PE=1 SV=1 1.23659e-44	tr|B9I6J5|B9I6J5_POPTR Predicted protein OS=Populus trichocarpa GN=POPTRDRAFT_571841 PE=4 SV=1 8.2e-60	GO:0005509, calcium ion binding;GO:0009733, response to auxin	-
TRINITY_DN46874_c0_g3	0.809392	6.65553	-3.03964	0.00117379	0.0271937	down	-	-	gi|743916994|ref|XP_011002480.1| PREDICTED: calcium-binding protein PBP1-like [Populus euphratica] 1.3e-18	gi|566154215|ref|XM_006370301.1| Populus trichocarpa hypothetical protein (POPTR_0001s41980g) mRNA, complete cds 7.98205e-91	-	sp|Q9LSQ6|PBP1_ARATH Calcium-binding protein PBP1 OS=Arabidopsis thaliana GN=PBP1 PE=1 SV=1 7.59893e-09	tr|B9N558|B9N558_POPTR Predicted protein OS=Populus trichocarpa GN=POPTRDRAFT_582064 PE=4 SV=1 5.7e-19	GO:0005509, calcium ion binding;GO:0009733, response to auxin	-
TRINITY_DN53818_c1_g4	94.8384	40.8192	1.21622	0.0001803	0.00722079	up	-	-	-	gi|566189869|ref|XM_006378306.1| Populus trichocarpa hypothetical protein (POPTR_0010s09010g) mRNA, complete cds 1.28075e-43	-	-	-	-	-
TRINITY_DN50458_c0_g3	4.2433	14.4065	-1.76347	0.000218542	0.00825791	down	PLN00113, PLN00113, leucine-rich repeat receptor-like protein kinase; Provisional. 1.42596e-11	-	gi|566187234|ref|XP_002313141.2| hypothetical protein POPTR_0009s10000g [Populus trichocarpa] 9.2e-97	gi|743794751|ref|XM_011002746.1| PREDICTED: Populus euphratica leucine-rich repeat receptor-like protein kinase PEPR1 (LOC105108436), mRNA 0.0	-	sp|C0LGQ9|Y4294_ARATH Probable LRR receptor-like serine/threonine-protein kinase At4g20940 OS=Arabidopsis thaliana GN=At4g20940 PE=1 SV=1 3.49336e-10	tr|B9HS48|B9HS48_POPTR Predicted protein OS=Populus trichocarpa GN=POPTRDRAFT_557428 PE=4 SV=1 7.8e-98	GO:0004674, protein serine/threonine kinase activity;GO:0005524, ATP binding;GO:0005886, plasma membrane;GO:0016021, integral component of membrane	-
TRINITY_DN50817_c0_g1	1.9622	5.58867	-1.51003	0.00226542	0.0417688	down	-	KOG0779, KOG0779, KOG0779, Protease, Ulp1 family [Posttranslational modification, protein turnover, chaperones]. 4.7488e-06	gi|566179367|ref|XP_002310486.2| Ulp1 protease family protein [Populus trichocarpa] 5.7e-176	gi|566179366|ref|XM_002310450.2| Populus trichocarpa Ulp1 protease family protein (POPTR_0007s03240g) mRNA, complete cds 0.0	-	sp|Q8L7S0|ULP2B_ARATH Probable ubiquitin-like-specific protease 2B OS=Arabidopsis thaliana GN=ULP2B PE=1 SV=3 6.64286e-36	tr|B9HEB6|B9HEB6_POPTR Predicted protein OS=Populus trichocarpa GN=POPTRDRAFT_562372 PE=4 SV=1 7.0e-176	GO:0008234, cysteine-type peptidase activity;GO:0016926, protein desumoylation;GO:0016929, SUMO-specific protease activity	-
TRINITY_DN55804_c0_g1	1.04134	5.71173	-2.45549	0.000375466	0.01228	down	cd05117, STKc_CAMK, The catalytic domain of CAMK family Serine/Threonine Kinases. STKs catalyze the transfer of the gamma-phosphoryl group from ATP to serine/threonine residues on protein substrates. CaMKs are multifunctional calcium and calmodulin (CaM) stimulated STKs involved in cell cycle regulation. There are several types of CaMKs including CaMKI, CaMKII, and CaMKIV. CaMKI proteins are mono…	KOG0032, KOG0032, KOG0032, Ca2+/calmodulin-dependent protein kinase, EF-Hand protein superfamily [Signal transduction mechanisms]. 6.01444e-87	gi|566209085|ref|XP_002323364.2| calcium-dependent protein kinase 1 [Populus trichocarpa] 1.6e-108	gi|566209084|ref|XM_002323328.2| Populus trichocarpa calcium-dependent protein kinase 1 (POPTR_0016s06700g) mRNA, complete cds 0.0	pfam00069, Pkinase, Protein kinase domain. 3.62709e-36	sp|Q38870|CDPK2_ARATH Calcium-dependent protein kinase 2 OS=Arabidopsis thaliana GN=CPK2 PE=1 SV=1 4.44455e-152	tr|B9IIH7|B9IIH7_POPTR Calcium dependent protein kinase 19 (Fragment) OS=Populus trichocarpa GN=CPK19 PE=4 SV=1 6.7e-109	GO:0004683, calmodulin-dependent protein kinase activity;GO:0005509, calcium ion binding;GO:0005516, calmodulin binding;GO:0005524, ATP binding;GO:0005634, nucleus;GO:0005737, cytoplasm;GO:0005789, endoplasmic reticulum membrane;GO:0005886, plasma membrane;GO:0009738, abscisic acid-activated signaling pathway;GO:0009931, calcium-dependent protein serine/threonine kinase activity;GO:0018105, pepti…	-
TRINITY_DN55874_c0_g5	8.3791	78.0258	-3.21908	0.00270112	0.0474488	down	PLN00028, PLN00028, nitrate transmembrane transporter; Provisional. 4.33645e-93	-	gi|566206749|ref|XP_002321622.2| high-affinity nitrate transporter family protein [Populus trichocarpa] 4.4e-99	gi|57283316|emb|AJ646891.1| Populus tremula x Populus tremuloides mRNA for nitrate transporter (tNit2.2 gene) 0.0	-	sp|Q9LPV5|NRT25_ARATH High affinity nitrate transporter 2.5 OS=Arabidopsis thaliana GN=NRT2.5 PE=2 SV=1 1.76886e-103	tr|B9IEW2|B9IEW2_POPTR High affinity nitrate transporter (Fragment) OS=Populus trichocarpa GN=PtNrt2-6 PE=2 SV=1 1.9e-99	GO:0005886, plasma membrane;GO:0016021, integral component of membrane;GO:0042128, nitrate assimilation;GO:0055085, transmembrane transport	-
TRINITY_DN53236_c0_g1	7.94675	44.9735	-2.50064	0.000120277	0.00537506	down	-	-	gi|566172621|ref|XP_002306721.2| hypothetical protein POPTR_0005s21920g [Populus trichocarpa] 1.4e-11	gi|566157551|ref|XM_002301112.2| Populus trichocarpa hypothetical protein (POPTR_0002s11920g) mRNA, complete cds 0.0	-	-	tr|B9GNP4|B9GNP4_POPTR Predicted protein OS=Populus trichocarpa GN=POPTRDRAFT_798854 PE=4 SV=1 9.3e-13	-	-
TRINITY_DN46090_c0_g1	24.7816	11.1662	1.15014	6.31e-05	0.00321752	up	cd01871, Rac1_like, Ras-related C3 botulinum toxin substrate 1 (rho family, small GTP binding protein Rac1)-like consists of Rac1, Rac2 and Rac3. The Rac1-like subfamily consists of Rac1, Rac2, and Rac3 proteins, plus the splice variant Rac1b that contains a 19-residue insertion near switch II relative to Rac1. While Rac1 is ubiquitously expressed, Rac2 and Rac3 are largely restricted to hematopo…	KOG0393, KOG0393, KOG0393, Ras-related small GTPase, Rho type [General function prediction only]. 4.54967e-99	gi|147906150|ref|NP_001089332.1| ras-related C3 botulinum toxin substrate 1 (rho family, small GTP binding protein Rac1) [Xenopus laevis] 1.2e-95	gi|117676397|ref|NM_009007.2| Mus musculus RAS-related C3 botulinum substrate 1 (Rac1), mRNA 0.0	pfam00071, Ras, Ras family. Includes sub-families Ras, Rab, Rac, Ral, Ran, Rap Ypt1 and more. Shares P-loop motif with GTP_EFTU, arf and myosin_head. See pfam00009 pfam00025, pfam00063. As regards Rab GTPases, these are important regulators of vesicle formation, motility and fusion. They share a fold in common with all Ras GTPases: this is a six-stranded beta-sheet surrounded by five alpha-helice…	sp|Q6RUV5|RAC1_RAT Ras-related C3 botulinum toxin substrate 1 OS=Rattus norvegicus GN=Rac1 PE=1 SV=1 7.7675e-118	tr|B5X3B0|B5X3B0_SALSA Ras-related C3 botulinum toxin substrate 1 OS=Salmo salar GN=RAC1 PE=2 SV=1 4.9e-96	GO:0000139, Golgi membrane;GO:0001891, phagocytic cup;GO:0001934, positive regulation of protein phosphorylation;GO:0002093, auditory receptor cell morphogenesis;GO:0002551, mast cell chemotaxis;GO:0003382, epithelial cell morphogenesis;GO:0003924, GTPase activity;GO:0005525, GTP binding;GO:0005622, intracellular;GO:0005634, nucleus;GO:0005737, cytoplasm;GO:0005802, trans-Golgi network;GO:0005829…	K04392-ko04370 VEGF signaling pathway;ko04014 Ras signaling pathway;ko04015 Rap1 signaling pathway;ko04520 Adherens junction;ko04071 Sphingolipid signaling pathway;ko04145 Phagosome;ko04013 MAPK signaling pathway - fly;ko04510 Focal adhesion;ko04010 MAPK signaling pathway;ko04024 cAMP signaling pathway;ko04310 Wnt signaling pathway;ko04151 PI3K-Akt signaling pathway;ko04810 Regulation of actin cy…
TRINITY_DN49384_c1_g1	5.48471	16.3929	-1.57958	0.0026263	0.0464425	down	cd00018, AP2, DNA-binding domain found in transcription regulators in plants such as APETALA2 and EREBP (ethylene responsive element binding protein). In EREBPs the domain specifically binds to the 11bp GCC box of the ethylene response element (ERE), a promotor element essential for ethylene responsiveness. EREBPs and the C-repeat binding factor CBF1, which is involved in stress response, contain…	-	gi|224058399|ref|XP_002299493.1| hypothetical protein POPTR_0001s10300g [Populus trichocarpa] 5.7e-159	gi|566148220|ref|XM_002299457.2| Populus trichocarpa hypothetical protein (POPTR_0001s10300g) mRNA, complete cds 0.0	-	sp|O82503|CRF1_ARATH Ethylene-responsive transcription factor CRF1 OS=Arabidopsis thaliana GN=CRF1 PE=1 SV=1 8.03123e-49	tr|B9GL91|B9GL91_POPTR AP2/ERF domain-containing transcription factor OS=Populus trichocarpa GN=ERF87 PE=4 SV=1 2.4e-159	GO:0003677, DNA binding;GO:0003700, transcription factor activity, sequence-specific DNA binding;GO:0005634, nucleus;GO:0005737, cytoplasm;GO:0006351, transcription, DNA-templated;GO:0009736, cytokinin-activated signaling pathway;GO:0009873, ethylene-activated signaling pathway;GO:0042991, transcription factor import into nucleus;GO:0048366, leaf development;GO:0048825, cotyledon development	-
TRINITY_DN45082_c2_g2	28.8746	10.6017	1.44551	0.00217843	0.0406552	up	pfam03018, Dirigent, Dirigent-like protein. This family contains a number of proteins which are induced during disease response in plants. Members of this family are involved in lignification. 1.35846e-61	-	gi|566177358|ref|XP_002309288.2| hypothetical protein POPTR_0006s20990g [Populus trichocarpa] 2.5e-101	gi|566177357|ref|XM_002309252.2| Populus trichocarpa hypothetical protein (POPTR_0006s20990g) mRNA, complete cds 0.0	pfam03018, Dirigent, Dirigent-like protein. This family contains a number of proteins which are induced during disease response in plants. Members of this family are involved in lignification. 3.24548e-62	sp|Q9FI66|DIR3_ARATH Dirigent protein 3 OS=Arabidopsis thaliana GN=DIR3 PE=3 SV=1 1.62715e-63	tr|B9H9Z8|B9H9Z8_POPTR Predicted protein (Fragment) OS=Populus trichocarpa GN=POPTRDRAFT_416253 PE=4 SV=1 9.4e-95	GO:0009699, phenylpropanoid biosynthetic process;GO:0042349, guiding stereospecific synthesis activity;GO:0048046, apoplast	-
TRINITY_DN57382_c1_g1	8.17362	29.8459	-1.86848	3.41e-05	0.00201669	down	-	KOG1051, KOG1051, KOG1051, Chaperone HSP104 and related ATP-dependent Clp proteases [Posttranslational modification, protein turnover, chaperones]. 3.56741e-47	gi|743879432|ref|XP_011035930.1| PREDICTED: uncharacterized protein LOC105133582 isoform X1 [Populus euphratica] 3.1e-265	gi|743879431|ref|XM_011037628.1| PREDICTED: Populus euphratica uncharacterized LOC105133582 (LOC105133582), transcript variant X1, mRNA ;gi|743879435|ref|XM_011037630.1| PREDICTED: Populus euphratica uncharacterized LOC105133582 (LOC105133582), transcript variant X2, mRNA ;gi|743879437|ref|XM_011037631.1| PREDICTED: Populus euphratica uncharacterized LOC105133582 (LOC105133582), transcript varian…	-	sp|F4IGZ2|SMXL8_ARATH Protein SMAX1-LIKE 8 OS=Arabidopsis thaliana GN=SMXL8 PE=1 SV=1 1.73652e-137	tr|B9HSN3|B9HSN3_POPTR Predicted protein (Fragment) OS=Populus trichocarpa GN=POPTRDRAFT_227037 PE=2 SV=1 2.1e-231	GO:0005524, ATP binding;GO:0005634, nucleus;GO:0006351, transcription, DNA-templated;GO:0006355, regulation of transcription, DNA-templated;GO:0019538, protein metabolic process;GO:1902347, response to strigolactone	-
TRINITY_DN57382_c1_g3	14.3262	46.3481	-1.69386	0.000173448	0.00700534	down	CHL00095, clpC, Clp protease ATP binding subunit. 3.84671e-13	KOG1051, KOG1051, KOG1051, Chaperone HSP104 and related ATP-dependent Clp proteases [Posttranslational modification, protein turnover, chaperones]. 5.9885e-25	gi|566191679|ref|XP_002316209.2| hypothetical protein POPTR_0010s19560g [Populus trichocarpa] 4.8e-191	gi|566191678|ref|XM_002316173.2| Populus trichocarpa hypothetical protein (POPTR_0010s19560g) mRNA, complete cds 0.0	pfam07724, AAA_2, AAA domain (Cdc48 subfamily). This Pfam entry includes some of the AAA proteins not detected by the pfam00004 model. 1.53925e-13	sp|F4IGZ2|SMXL8_ARATH Protein SMAX1-LIKE 8 OS=Arabidopsis thaliana GN=SMXL8 PE=1 SV=1 4.98028e-63	tr|B9HSN2|B9HSN2_POPTR Predicted protein OS=Populus trichocarpa GN=POPTRDRAFT_659508 PE=2 SV=1 2.4e-192	GO:0005524, ATP binding;GO:0005634, nucleus;GO:0006351, transcription, DNA-templated;GO:0006355, regulation of transcription, DNA-templated;GO:0019538, protein metabolic process;GO:1902347, response to strigolactone	-
TRINITY_DN48736_c0_g1	31.9011	75.4148	-1.24124	0.00284777	0.0491176	down	COG0661, AarF, Predicted unusual protein kinase [General function prediction only]. 3.50428e-50	KOG1235, KOG1235, KOG1235, Predicted unusual protein kinase [General function prediction only]. 7.07779e-49	gi|743927761|ref|XP_011008064.1| PREDICTED: uncharacterized aarF domain-containing protein kinase At1g79600, chloroplastic isoform X1 [Populus euphratica] 6.9e-229	gi|566204642|ref|XM_002320491.2| Populus trichocarpa ABC1 family protein (POPTR_0014s16660g) mRNA, complete cds 0.0	pfam03109, ABC1, ABC1 family. This family includes ABC1 from yeast and AarF from E. coli. These proteins have a nuclear or mitochondrial subcellular location in eukaryotes. The exact molecular functions of these proteins is not clear, however yeast ABC1 suppresses a cytochrome b mRNA translation defect and is essential for the electron transfer in the bc 1 complex and E. coli AarF is required for…	sp|P73627|Y1770_SYNY3 Uncharacterized protein sll1770 OS=Synechocystis sp. (strain PCC 6803 / Kazusa) GN=sll1770 PE=3 SV=1 1.65681e-126	tr|B9IAU6|B9IAU6_POPTR Predicted protein OS=Populus trichocarpa GN=POPTRDRAFT_732469 PE=4 SV=1 1.4e-228	GO:0004672, protein kinase activity;GO:0005524, ATP binding;GO:0016021, integral component of membrane	-
TRINITY_DN54159_c0_g1	221.909	103.466	1.1008	0.000584561	0.0168187	up	-	-	gi|682235044|gb|AIN36561.1| phosphoenolpyruvate carboxylase 1, partial [Populus tremula x Populus alba] 4.2e-31	gi|566153805|ref|XM_006370096.1| Populus trichocarpa phosphoenolpyruvate carboxylase family protein (POPTR_0001s40250g) mRNA, complete cds 8.33996e-102	-	sp|Q84VW9|CAPP3_ARATH Phosphoenolpyruvate carboxylase 3 OS=Arabidopsis thaliana GN=PPC3 PE=2 SV=2 5.71644e-34	tr|B9N631|B9N631_POPTR Predicted protein OS=Populus trichocarpa GN=POPTRDRAFT_745223 PE=3 SV=1 1.7e-31	GO:0005829, cytosol;GO:0006099, tricarboxylic acid cycle;GO:0008964, phosphoenolpyruvate carboxylase activity;GO:0009507, chloroplast;GO:0015977, carbon fixation;GO:0015979, photosynthesis;GO:0048046, apoplast;GO:0048366, leaf development	-
TRINITY_DN45539_c0_g1	40.6916	15.9603	1.35024	9.19e-05	0.00434067	up	-	-	gi|566156402|ref|XP_006386275.1| hypothetical protein POPTR_0002s05560g [Populus trichocarpa] 9.6e-18	gi|566156401|ref|XM_006386213.1| Populus trichocarpa hypothetical protein (POPTR_0002s05560g) mRNA, complete cds 3.938e-151	-	sp|Q9SVC4|OEP7_ARATH Outer envelope membrane protein 7 OS=Arabidopsis thaliana GN=OEP7 PE=1 SV=1 6.09586e-07	tr|B9H870|B9H870_POPTR Predicted protein OS=Populus trichocarpa GN=POPTRDRAFT_651735 PE=4 SV=1 4.8e-11	GO:0009707, chloroplast outer membrane;GO:0031359, integral component of chloroplast outer membrane	-
TRINITY_DN45539_c0_g2	20.0181	8.32718	1.2654	8.14e-05	0.00392331	up	-	-	gi|224082618|ref|XP_002306767.1| outer envelope membrane family protein [Populus trichocarpa] 2.8e-16	gi|566172793|ref|XM_002306731.2| Populus trichocarpa outer envelope membrane family protein (POPTR_0005s22960g) mRNA, complete cds 0.0	-	sp|Q9SVC4|OEP7_ARATH Outer envelope membrane protein 7 OS=Arabidopsis thaliana GN=OEP7 PE=1 SV=1 9.06601e-07	tr|B9H870|B9H870_POPTR Predicted protein OS=Populus trichocarpa GN=POPTRDRAFT_651735 PE=4 SV=1 1.2e-16	GO:0009707, chloroplast outer membrane;GO:0031359, integral component of chloroplast outer membrane	-
TRINITY_DN55451_c0_g4	6.49325	18.7151	-1.52719	0.000419409	0.0133005	down	TIGR00898, organic_anion_transporter, cation transport protein. [Transport and binding proteins, Cations and iron carrying compounds]. 9.76206e-29	KOG0253, KOG0253, KOG0253, Synaptic vesicle transporter SV2 (major facilitator superfamily) [General function prediction only]. 1.42819e-43	gi|566215953|ref|XP_006372271.1| hypothetical protein POPTR_0018s14850g [Populus trichocarpa] 3.7e-153	gi|566215952|ref|XM_006372209.1| Populus trichocarpa hypothetical protein (POPTR_0018s14850g) mRNA, complete cds 0.0	-	sp|Q940M4|OCT7_ARATH Organic cation/carnitine transporter 7 OS=Arabidopsis thaliana GN=OCT7 PE=2 SV=1 3.00557e-84	tr|B9N801|B9N801_POPTR Predicted protein OS=Populus trichocarpa GN=POPTRDRAFT_811664 PE=4 SV=1 5.4e-154	GO:0005524, ATP binding;GO:0005886, plasma membrane;GO:0016021, integral component of membrane;GO:0022891, substrate-specific transmembrane transporter activity;GO:0090416, nicotinate transporter activity;GO:0090417, N-methylnicotinate transporter activity;GO:2001142, nicotinate transport;GO:2001143, N-methylnicotinate transport	-
TRINITY_DN57734_c2_g1	353.838	165.242	1.09851	0.000751264	0.0199775	up	-	-	-	gi|156255262|gb|AC208942.1| Populus trichocarpa clone JGIACSB1089-D10, complete sequence 0.0	-	-	-	-	-
TRINITY_DN52276_c0_g1	82.2871	30.513	1.43124	3.19e-07	4.71e-05	up	PRK14250, PRK14250, phosphate ABC transporter ATP-binding protein; Provisional. 3.26722e-37	KOG0055, KOG0055, KOG0055, Multidrug/pheromone exporter, ABC superfamily [Secondary metabolites biosynthesis, transport and catabolism]. 3.74255e-15	gi|566215622|ref|XP_002325227.2| hypothetical protein POPTR_0018s13190g [Populus trichocarpa] 1.9e-72	gi|566215621|ref|XM_002325191.2| Populus trichocarpa hypothetical protein (POPTR_0018s13190g) mRNA, complete cds 0.0	pfam00005, ABC_tran, ABC transporter. ABC transporters for a large family of proteins responsible for translocation of a variety of compounds across biological membranes. ABC transporters are the largest family of proteins in many completely sequenced bacteria. ABC transporters are composed of two copies of this domain and two copies of a transmembrane domain pfam00664. These four domains may bel…	sp|Q9C9W0|AB17I_ARATH ABC transporter I family member 17 OS=Arabidopsis thaliana GN=ABCI17 PE=2 SV=1 1.22662e-79	tr|B9IN00|B9IN00_POPTR Predicted protein OS=Populus trichocarpa GN=POPTRDRAFT_1107359 PE=3 SV=1 2.4e-72	GO:0005215, transporter activity;GO:0005524, ATP binding;GO:0005774, vacuolar membrane;GO:0005886, plasma membrane;GO:0016887, ATPase activity	-
TRINITY_DN56773_c1_g3	9.46966	2.2278	2.08769	0.000873903	0.0221776	up	-	-	-	gi|566187306|ref|XM_002313083.2| Populus trichocarpa hypothetical protein (POPTR_0009s10400g) mRNA, complete cds 2.68983e-104	-	sp|Q9M7Q2|AI5L7_ARATH ABSCISIC ACID-INSENSITIVE 5-like protein 7 OS=Arabidopsis thaliana GN=ABF4 PE=1 SV=1 1.31724e-07	-	GO:0003700, transcription factor activity, sequence-specific DNA binding;GO:0005634, nucleus;GO:0006351, transcription, DNA-templated;GO:0009738, abscisic acid-activated signaling pathway;GO:0043565, sequence-specific DNA binding	-
TRINITY_DN50241_c0_g1	19.6679	9.64067	1.02864	0.000647508	0.0180007	up	PTZ00173, PTZ00173, 60S ribosomal protein L10; Provisional. 1.61544e-29	KOG0857, KOG0857, KOG0857, 60s ribosomal protein L10 [Translation, ribosomal structure and biogenesis]. 5.54084e-28	gi|566256111|ref|XP_006388046.1| hypothetical protein POPTR_0381s00220g [Populus trichocarpa] 1.1e-45	gi|566256110|ref|XM_006387984.1| Populus trichocarpa hypothetical protein (POPTR_0381s00220g) mRNA, complete cds 0.0	-	sp|Q9SPB3|RL10_VITRI 60S ribosomal protein L10 OS=Vitis riparia GN=RPL10 PE=2 SV=1 1.95965e-41	tr|B3TLM0|B3TLM0_ELAGV QM-like protein OS=Elaeis guineensis var. tenera PE=2 SV=1 3.1e-39	GO:0003735, structural constituent of ribosome;GO:0005840, ribosome;GO:0006412, translation	-
TRINITY_DN58024_c3_g1	4.51383	13.0244	-1.5288	0.00153647	0.0326611	down	-	-	gi|224112901|ref|XP_002316325.1| hypothetical protein POPTR_0010s22070g [Populus trichocarpa] 2.1e-184	gi|566192127|ref|XM_002316289.2| Populus trichocarpa hypothetical protein (POPTR_0010s22070g) mRNA, complete cds 0.0	-	-	tr|B9HTY9|B9HTY9_POPTR Predicted protein OS=Populus trichocarpa GN=POPTRDRAFT_770451 PE=2 SV=1 8.8e-185	-	-
TRINITY_DN54589_c1_g6	128.879	63.889	1.01238	0.000781535	0.0205523	up	PTZ00054, PTZ00054, 60S ribosomal protein L23; Provisional. 5.30147e-08	KOG0901, KOG0901, KOG0901, 60S ribosomal protein L14/L17/L23 [Translation, ribosomal structure and biogenesis]. 7.54381e-07	gi|729415063|ref|XP_010556919.1| PREDICTED: 60S ribosomal protein L23-like isoform X1 [Tarenaya hassleriana] 2.8e-07	gi|743854319|ref|XM_011031462.1| PREDICTED: Populus euphratica 60S ribosomal protein L23-like (LOC105129416), mRNA 4.94965e-41	-	sp|P49690|RL23_ARATH 60S ribosomal protein L23 OS=Arabidopsis thaliana GN=RPL23A PE=2 SV=3 3.70855e-10	tr|M0RQ16|M0RQ16_MUSAM Uncharacterized protein OS=Musa acuminata subsp. malaccensis PE=3 SV=1 1.3e-06	GO:0003735, structural constituent of ribosome;GO:0005730, nucleolus;GO:0005840, ribosome;GO:0006412, translation;GO:0022625, cytosolic large ribosomal subunit;GO:0070180, large ribosomal subunit rRNA binding	-
TRINITY_DN41745_c0_g1	46.8429	112.675	-1.26627	0.00270373	0.0474588	down	TIGR01160, Eukaryotic_translation_initiation_factor_1, translation initiation factor SUI1, eukaryotic. Alternate name: MOF2. A similar protein family (see TIGRFAMs model TIGR01158) is found in prokaryotes. The human proteins complements a yeast SUI1 mutatation. [Protein synthesis, Translation factors]. 2.06049e-44	KOG1770, KOG1770, KOG1770, Translation initiation factor 1 (eIF-1/SUI1) [Translation, ribosomal structure and biogenesis]. 2.54058e-37	gi|224112044|ref|XP_002316065.1| hypothetical protein POPTR_0010s16160g [Populus trichocarpa] 3.7e-53	gi|566191092|ref|XM_002316029.2| Populus trichocarpa hypothetical protein (POPTR_0010s16160g) mRNA, complete cds 0.0	pfam01253, SUI1, Translation initiation factor SUI1. 3.77414e-08	sp|Q94JV4|SUI12_ARATH Protein translation factor SUI1 homolog 2 OS=Arabidopsis thaliana GN=At1g54290 PE=3 SV=1 4.85771e-52	tr|A9PDW0|A9PDW0_POPTR Predicted protein OS=Populus trichocarpa GN=POPTRDRAFT_723991 PE=4 SV=1 1.6e-53	GO:0003743, translation initiation factor activity;GO:0006417, regulation of translation	K03113-ko03013 RNA transport
TRINITY_DN48030_c0_g4	18.5671	1.34092	3.79145	5.52e-16	1.24e-12	up	PLN00050, PLN00050, expansin A; Provisional. 7.21768e-54	-	gi|224140591|ref|XP_002323665.1| expansin S1 precursor family protein [Populus trichocarpa] 7.7e-58	gi|566210235|ref|XM_002323629.2| Populus trichocarpa expansin S1 precursor family protein (POPTR_0016s14260g) mRNA, complete cds 0.0	pfam01357, Pollen_allerg_1, Pollen allergen. This family contains allergens lol PI, PII and PIII from Lolium perenne. 2.81373e-20	sp|O22874|EXPA8_ARATH Expansin-A8 OS=Arabidopsis thaliana GN=EXPA8 PE=2 SV=1 3.80888e-59	tr|B9IGR9|B9IGR9_POPTR Putative uncharacterized protein PtEXPA13 OS=Populus trichocarpa GN=PtEXPA13 PE=3 SV=1 3.2e-58	GO:0005576, extracellular region;GO:0005618, cell wall;GO:0006949, syncytium formation;GO:0009664, plant-type cell wall organization;GO:0016020, membrane	-
TRINITY_DN28618_c0_g1	0.799183	10.1498	-3.66678	2.63e-06	0.000265173	down	-	-	gi|566187512|ref|XP_002313803.2| hypothetical protein POPTR_0009s11730g [Populus trichocarpa] 4.1e-48	gi|566187511|ref|XM_002313767.2| Populus trichocarpa hypothetical protein (POPTR_0009s11730g) mRNA, complete cds 0.0	-	-	tr|B9HRP7|B9HRP7_POPTR Predicted protein OS=Populus trichocarpa GN=POPTRDRAFT_767458 PE=4 SV=1 1.7e-40	GO:0016021, integral component of membrane	-
TRINITY_DN49718_c0_g1	16.6585	7.91288	1.07398	0.000150485	0.00630389	up	PRK00982, acpP, acyl carrier protein; Provisional. 1.90622e-11	KOG1748, KOG1748, KOG1748, Acyl carrier protein/NADH-ubiquinone oxidoreductase, NDUFAB1/SDAP subunit [Energy production and conversion, Lipid transport and metabolism, Secondary metabolites biosynthesis, transport and catabolism]. 1.19262e-13	gi|566157872|ref|XP_002301222.2| acyl carrier family protein [Populus trichocarpa] 1.0e-18	gi|566157871|ref|XM_002301186.2| Populus trichocarpa acyl carrier family protein (POPTR_0002s13660g) mRNA, complete cds 0.0	-	sp|P53665|ACPM1_ARATH Acyl carrier protein 1, mitochondrial OS=Arabidopsis thaliana GN=MTACP1 PE=2 SV=1 8.54723e-21	tr|A9P8W3|A9P8W3_POPTR Acyl carrier protein OS=Populus trichocarpa GN=POPTRDRAFT_711128 PE=2 SV=1 4.3e-19	GO:0005739, mitochondrion;GO:0005759, mitochondrial matrix;GO:0006633, fatty acid biosynthetic process;GO:0055114, oxidation-reduction process;GO:0070469, respiratory chain	-
TRINITY_DN57550_c2_g1	1.54927	7.34594	-2.24536	0.000343695	0.0114707	down	cd00693, secretory_peroxidase, Horseradish peroxidase and related secretory plant peroxidases. Secretory peroxidases belong to class III of the plant heme-dependent peroxidase superfamily. All members of the superfamily share a heme prosthetic group and catalyze a multistep oxidative reaction involving hydrogen peroxide as the electron acceptor. Class III peroxidases are found in the extracellula…	-	gi|566189043|ref|XP_006378181.1| Peroxidase 6 precursor family protein [Populus trichocarpa] 3.0e-178	gi|566189042|ref|XM_006378119.1| Populus trichocarpa Peroxidase 6 precursor family protein (POPTR_0010s04550g) mRNA, complete cds 0.0	pfam00141, peroxidase, Peroxidase. 9.98277e-31	sp|O48677|PER6_ARATH Peroxidase 6 OS=Arabidopsis thaliana GN=PER6 PE=2 SV=1 9.26659e-131	tr|B9HMT7|B9HMT7_POPTR Predicted protein OS=Populus trichocarpa GN=POPTRDRAFT_565406 PE=3 SV=1 4.4e-179	GO:0004601, peroxidase activity;GO:0005576, extracellular region;GO:0006979, response to oxidative stress;GO:0020037, heme binding;GO:0042744, hydrogen peroxide catabolic process;GO:0046872, metal ion binding	K00430-ko00940 Phenylpropanoid biosynthesis
TRINITY_DN46048_c0_g1	1542.33	593.818	1.37702	1.56e-06	0.000172724	up	-	-	gi|566171473|ref|XP_006383388.1| hypothetical protein POPTR_0005s15070g [Populus trichocarpa] 1.2e-54	gi|156523313|gb|AC209042.1| Populus trichocarpa clone POP052-O09, complete sequence 0.0	-	-	tr|B9GVA7|B9GVA7_POPTR Predicted protein OS=Populus trichocarpa GN=POPTRDRAFT_553051 PE=4 SV=1 3.5e-56	-	-
TRINITY_DN57873_c3_g4	11.8779	5.54208	1.09978	0.00292314	0.0499418	up	pfam03094, Mlo, Mlo family. A family of plant integral membrane proteins, first discovered in barley. Mutants lacking wild-type Mlo proteins show broad spectrum resistance to the powdery mildew fungus, and dysregulated cell death control, with spontaneous cell death in response to developmental or abiotic stimuli. Thus wild-type Mlo proteins are thought to be inhibitors of cell death whose defici…	-	gi|566192234|ref|XP_002315295.2| hypothetical protein POPTR_0010s22730g [Populus trichocarpa] 4.3e-77	gi|162329707|gb|AC215733.1| Populus trichocarpa clone POP051-I21, complete sequence 0.0	pfam03094, Mlo, Mlo family. A family of plant integral membrane proteins, first discovered in barley. Mutants lacking wild-type Mlo proteins show broad spectrum resistance to the powdery mildew fungus, and dysregulated cell death control, with spontaneous cell death in response to developmental or abiotic stimuli. Thus wild-type Mlo proteins are thought to be inhibitors of cell death whose defici…	sp|Q94KB7|MLO6_ARATH MLO-like protein 6 OS=Arabidopsis thaliana GN=MLO6 PE=2 SV=2 4.55938e-30	tr|B9HU52|B9HU52_POPTR MLO-like protein OS=Populus trichocarpa GN=POPTRDRAFT_1092387 PE=3 SV=1 1.8e-77	GO:0005886, plasma membrane;GO:0006952, defense response;GO:0009607, response to biotic stimulus;GO:0009817, defense response to fungus, incompatible interaction;GO:0016021, integral component of membrane	-
TRINITY_DN49364_c1_g1	2.95228	10.2111	-1.79024	7.47e-05	0.00366904	down	pfam03547, Mem_trans, Membrane transport protein. This family includes auxin efflux carrier proteins and other transporter proteins from all domains of life. 2.38556e-29	-	gi|224135561|ref|XP_002322104.1| auxin efflux carrier component 1 family protein [Populus trichocarpa] 4.8e-221	gi|10441743|gb|AF190881.1| Populus tremula x Populus tremuloides PIN1-like auxin transport protein (pin1) mRNA, complete cds 0.0	pfam03547, Mem_trans, Membrane transport protein. This family includes auxin efflux carrier proteins and other transporter proteins from all domains of life. 5.69932e-30	sp|Q9C6B8|PINI_ARATH Auxin efflux carrier component 1 OS=Arabidopsis thaliana GN=PIN1 PE=1 SV=1 0.0	tr|B9IEC3|B9IEC3_POPTR Auxin efflux carrier component OS=Populus trichocarpa GN=PIN1 PE=4 SV=1 2.0e-221	GO:0005215, transporter activity;GO:0005737, cytoplasm;GO:0005783, endoplasmic reticulum;GO:0005886, plasma membrane;GO:0009505, plant-type cell wall;GO:0009506, plasmodesma;GO:0009630, gravitropism;GO:0009640, photomorphogenesis;GO:0009734, auxin-activated signaling pathway;GO:0009793, embryo development ending in seed dormancy;GO:0009908, flower development;GO:0009925, basal plasma membrane;GO:…	-
TRINITY_DN57777_c1_g1	0.716757	14.6838	-4.3566	0.00137465	0.0305404	down	PLN00113, PLN00113, leucine-rich repeat receptor-like protein kinase; Provisional. 9.57202e-28	KOG0444, KOG0444, KOG0444, Cytoskeletal regulator Flightless-I (contains leucine-rich and gelsolin repeats) [Cytoskeleton]. 6.62807e-08	gi|743937000|ref|XP_011012898.1| PREDICTED: probable LRR receptor-like serine/threonine-protein kinase At1g53420 isoform X3 [Populus euphratica] 2.6e-176	gi|743936999|ref|XM_011014596.1| PREDICTED: Populus euphratica probable leucine-rich repeat receptor-like serine/threonine-protein kinase At3g14840 (LOC105117055), transcript variant X3, mRNA 0.0	pfam11721, Malectin, Di-glucose binding within endoplasmic reticulum. Malectin is a membrane-anchored protein of the endoplasmic reticulum that recognizes and binds Glc2-N-glycan. It carries a signal peptide from residues 1-26, a C-terminal transmembrane helix from residues 255-274, and a highly conserved central part of approximately 190 residues followed by an acidic, glutamate-rich region. Car…	sp|C0LGG8|Y5343_ARATH Probable LRR receptor-like serine/threonine-protein kinase At1g53430 OS=Arabidopsis thaliana GN=At1g53430 PE=1 SV=1 5.39871e-70	tr|B9IFQ7|B9IFQ7_POPTR Predicted protein OS=Populus trichocarpa GN=POPTRDRAFT_825263 PE=4 SV=1 3.6e-167	GO:0004674, protein serine/threonine kinase activity;GO:0005524, ATP binding;GO:0005886, plasma membrane;GO:0016021, integral component of membrane	-
TRINITY_DN44947_c0_g2	2.19951	24.4589	-3.4751	5.2e-08	1.02e-05	down	PLN03220, PLN03220, uncharacterized protein; Provisional. 2.84453e-13	-	gi|566162118|ref|XP_002303522.2| auxin-responsive family protein [Populus trichocarpa] 1.4e-97	gi|743871672|ref|XM_011035620.1| PREDICTED: Populus euphratica uncharacterized LOC105132253 (LOC105132253), mRNA 0.0	pfam02519, Auxin_inducible, Auxin responsive protein. This family consists of the protein products of the ARG7 auxin responsive genes family none of which have any identified functional role. 1.66718e-13	sp|O22150|SAU36_ARATH Auxin-responsive protein SAUR36 OS=Arabidopsis thaliana GN=SAUR36 PE=2 SV=1 4.01649e-32	tr|B9GVQ9|B9GVQ9_POPTR SAUR family protein OS=Populus trichocarpa GN=SAUR18 PE=4 SV=1 3.9e-94	GO:0005634, nucleus;GO:0007275, multicellular organism development;GO:0009733, response to auxin;GO:0009734, auxin-activated signaling pathway;GO:0010029, regulation of seed germination;GO:0040008, regulation of growth;GO:1900057, positive regulation of leaf senescence	K14488-ko04075 Plant hormone signal transduction
TRINITY_DN55961_c1_g1	21.6654	9.07535	1.25537	1.15e-05	0.000858872	up	PLN02718, PLN02718, Probable galacturonosyltransferase. 9.7107e-44	-	gi|566156217|ref|XP_006386243.1| hypothetical protein POPTR_0002s04510g [Populus trichocarpa] 4.2e-34	gi|743850450|ref|XR_842919.1| PREDICTED: Populus euphratica uncharacterized LOC105128664 (LOC105128664), transcript variant X2, ncRNA 4.26177e-135	pfam07123, PsbW, Photosystem II reaction centre W protein (PsbW). This family consists of several plant specific photosystem II reaction centre W (PsbW) proteins. PsbW is a nuclear-encoded protein located in the thylakoid membrane of the chloroplast. PsbW is a core component of photosystem II but not photosystem I. This family does not appear to be related to pfam03912. 8.5749e-08	sp|Q8RXE1|GAUT5_ARATH Probable galacturonosyltransferase 5 OS=Arabidopsis thaliana GN=GAUT5 PE=2 SV=1 2.69778e-31	tr|B9H8H7|B9H8H7_POPTR Glycosyltransferase, CAZy family GT8 OS=Populus trichocarpa GN=POPTRDRAFT_559645 PE=4 SV=1 2.0e-30	GO:0000139, Golgi membrane;GO:0016021, integral component of membrane;GO:0045489, pectin biosynthetic process;GO:0047262, polygalacturonate 4-alpha-galacturonosyltransferase activity;GO:0071555, cell wall organization	-
TRINITY_DN50037_c1_g1	1.0014	7.11618	-2.82908	8.33e-07	0.000105549	down	smart00389, HOX, Homeodomain. DNA-binding factors that are involved in the transcriptional regulation of key developmental processes. 1.45632e-07	KOG0483, KOG0483, KOG0483, Transcription factor HEX, contains HOX and HALZ domains [Transcription]. 1.70647e-38	gi|566190101|ref|XP_006378408.1| hypothetical protein POPTR_0010s10340g [Populus trichocarpa] 7.2e-160	gi|566190100|ref|XM_006378346.1| Populus trichocarpa hypothetical protein (POPTR_0010s10340g) mRNA, complete cds 0.0	pfam00046, Homeobox, Homeobox domain. 9.97059e-08	sp|Q8LC03|ATB13_ARATH Homeobox-leucine zipper protein ATHB-13 OS=Arabidopsis thaliana GN=ATHB-13 PE=2 SV=2 1.7945e-99	tr|B9HVA1|B9HVA1_POPTR Predicted protein OS=Populus trichocarpa GN=POPTRDRAFT_822005 PE=3 SV=1 3.5e-148	GO:0003700, transcription factor activity, sequence-specific DNA binding;GO:0005634, nucleus;GO:0006351, transcription, DNA-templated;GO:0009744, response to sucrose;GO:0009965, leaf morphogenesis;GO:0043565, sequence-specific DNA binding;GO:0048826, cotyledon morphogenesis;GO:0080022, primary root development	-
TRINITY_DN45580_c0_g1	5.1798	1.87241	1.468	0.00257538	0.0458404	up	-	-	gi|224079343|ref|XP_002305828.1| hypothetical protein POPTR_0004s09650g [Populus trichocarpa] 3.8e-27	gi|157426994|gb|AC210651.1| Populus trichocarpa clone POP051-P08, complete sequence 0.0	-	-	tr|B9H319|B9H319_POPTR Predicted protein OS=Populus trichocarpa GN=POPTRDRAFT_758965 PE=4 SV=1 1.6e-27	-	-
TRINITY_DN45580_c0_g2	12.1149	4.24545	1.5128	1.26e-05	0.000921087	up	-	-	gi|743820921|ref|XP_011021279.1| PREDICTED: uncharacterized protein LOC105123400 [Populus euphratica] 3.2e-38	gi|164607228|gb|AC216541.1| Populus trichocarpa clone POP006-F12, complete sequence 0.0	-	-	tr|B9NC77|B9NC77_POPTR Predicted protein OS=Populus trichocarpa GN=POPTRDRAFT_788378 PE=4 SV=1 1.9e-37	-	-
TRINITY_DN46183_c1_g2	23.5099	10.4304	1.17247	0.000114961	0.00519714	up	-	KOG1770, KOG1770, KOG1770, Translation initiation factor 1 (eIF-1/SUI1) [Translation, ribosomal structure and biogenesis]. 4.14468e-06	gi|118481115|gb|ABK92511.1| unknown [Populus trichocarpa] 2.8e-14	gi|566195364|ref|XM_002316944.2| Populus trichocarpa hypothetical protein (POPTR_0011s13810g) mRNA, complete cds 0.0	-	sp|O48650|SUI1_SALBA Protein translation factor SUI1 homolog OS=Salix bakko PE=3 SV=1 1.71631e-06	tr|A9P808|A9P808_POPTR Putative uncharacterized protein OS=Populus trichocarpa PE=4 SV=1 1.2e-14	GO:0003743, translation initiation factor activity;GO:0006417, regulation of translation	-
TRINITY_DN50836_c1_g3	7.37928	22.9761	-1.63858	0.000138398	0.00592524	down	-	KOG0204, KOG0204, KOG0204, Calcium transporting ATPase [Inorganic ion transport and metabolism]. 7.53251e-28	gi|566181610|ref|XP_002310944.2| an N-terminal calmodulin binding autoinhibitory domain-containing family protein [Populus trichocarpa] 1.3e-88	gi|566181609|ref|XM_002310908.2| Populus trichocarpa an N-terminal calmodulin binding autoinhibitory domain-containing family protein (POPTR_0008s00850g) mRNA, complete cds 0.0	-	sp|Q9LU41|ACA9_ARATH Calcium-transporting ATPase 9, plasma membrane-type OS=Arabidopsis thaliana GN=ACA9 PE=2 SV=2 1.94858e-58	tr|B9HK60|B9HK60_POPTR Autoinhibited calcium ATPase OS=Populus trichocarpa GN=POPTRDRAFT_765045 PE=3 SV=1 1.6e-83	GO:0005388, calcium-transporting ATPase activity;GO:0005516, calmodulin binding;GO:0005524, ATP binding;GO:0005886, plasma membrane;GO:0005887, integral component of plasma membrane;GO:0007338, single fertilization;GO:0009555, pollen development;GO:0043231, intracellular membrane-bounded organelle;GO:0046872, metal ion binding	-
TRINITY_DN48593_c1_g1	101.155	287.817	-1.50859	0.0007564	0.0200638	down	-	-	-	gi|743843252|ref|XR_842610.1| PREDICTED: Populus euphratica uncharacterized LOC105127350 (LOC105127350), ncRNA 6.1944e-150	-	-	tr|B9GL74|B9GL74_POPTR Predicted protein OS=Populus trichocarpa GN=POPTRDRAFT_815043 PE=4 SV=1 8.8e-20	-	-
TRINITY_DN48635_c1_g2	4.45202	17.5639	-1.98008	0.000197945	0.00772478	down	cd01803, Ubiquitin, Ubiquitin. Ubiquitin (includes Ubq/RPL40e and Ubq/RPS27a fusions as well as homopolymeric multiubiquitin protein chains). 9.25448e-44	KOG0003, KOG0003, KOG0003, Ubiquitin/60s ribosomal protein L40 fusion [Translation, ribosomal structure and biogenesis]. 4.72581e-46	gi|302762631|ref|XP_002964737.1| hypothetical protein SELMODRAFT_270468 [Selaginella moellendorffii] 1.2e-187	gi|566210885|ref|XM_006372457.1| Populus trichocarpa polyubiquitin family protein (POPTR_0017s02410g) mRNA, complete cds 0.0	pfam00240, ubiquitin, Ubiquitin family. This family contains a number of ubiquitin-like proteins: SUMO (smt3 homologue), Nedd8, Elongin B, Rub1, and Parkin. A number of them are thought to carry a distinctive five-residue motif termed the proteasome-interacting motif (PIM), which may have a biologically significant role in protein delivery to proteasomes and recruitment of proteasomes to transcri…	sp|P0CH32|UBQ4_ARATH Polyubiquitin 4 OS=Arabidopsis thaliana GN=UBQ4 PE=1 SV=1 0.0	tr|H3K2Y9|H3K2Y9_DIACA Polyubiquitin OS=Dianthus caryophyllus GN=DcUbq2 PE=2 SV=1 5.1e-188	GO:0005634, nucleus;GO:0005737, cytoplasm;GO:0006511, ubiquitin-dependent protein catabolic process	-
TRINITY_DN57632_c2_g1	26.7434	81.2303	-1.60283	0.00222224	0.041232	down	PLN00181, PLN00181, protein SPA1-RELATED; Provisional. 0.0	KOG1033, KOG1033, KOG1033, eIF-2alpha kinase PEK/EIF2AK3 [Translation, ribosomal structure and biogenesis]. 2.26182e-16	gi|566153990|ref|XP_006370250.1| SPA1-RELATED 4 family protein [Populus trichocarpa] 0.0e+00	gi|566153991|ref|XM_006370189.1| Populus trichocarpa hypothetical protein (POPTR_0001s41030g) mRNA, complete cds 0.0	-	sp|Q9LJR3|SPA3_ARATH Protein SPA1-RELATED 3 OS=Arabidopsis thaliana GN=SPA3 PE=1 SV=1 0.0	tr|B9N1G5|B9N1G5_POPTR Predicted protein OS=Populus trichocarpa GN=POPTRDRAFT_1113820 PE=4 SV=1 0.0e+00	GO:0004672, protein kinase activity;GO:0005524, ATP binding;GO:0005634, nucleus;GO:0009585, red, far-red light phototransduction;GO:0042802, identical protein binding	-
TRINITY_DN49894_c2_g2	133.867	12.8762	3.37802	6.69e-20	3.58e-16	up	pfam13716, CRAL_TRIO_2, Divergent CRAL/TRIO domain. This family includes divergent members of the CRAL-TRIO domain family. This family includes ECM25 that contains a divergent CRAL-TRIO domain identified by Gallego and colleagues. 1.14477e-09	-	gi|566155709|ref|XP_002301938.2| Rho-GTPase-activating family protein [Populus trichocarpa] 1.3e-41	gi|566155708|ref|XM_002301902.2| Populus trichocarpa Rho-GTPase-activating family protein (POPTR_0002s01610g) mRNA, complete cds 3.38491e-134	pfam13716, CRAL_TRIO_2, Divergent CRAL/TRIO domain. This family includes divergent members of the CRAL-TRIO domain family. This family includes ECM25 that contains a divergent CRAL-TRIO domain identified by Gallego and colleagues. 2.73496e-10	-	tr|B9GQ59|B9GQ59_POPTR Predicted protein OS=Populus trichocarpa GN=POPTRDRAFT_830012 PE=4 SV=1 1.6e-41	-	-
TRINITY_DN50735_c1_g1	13.1201	5.71758	1.1983	0.000199231	0.00773999	up	pfam03134, TB2_DP1_HVA22, TB2/DP1, HVA22 family. This family includes members from a wide variety of eukaryotes. It includes the TB2/DP1 (deleted in polyposis) protein, which in humans is deleted in severe forms of familial adenomatous polyposis, an autosomal dominant oncological inherited disease. The family also includes the plant protein of known similarity to TB2/DP1, the HVA22 abscisic acid-…	KOG1725, KOG1725, KOG1725, Protein involved in membrane traffic (YOP1/TB2/DP1/HVA22 family) [Intracellular trafficking, secretion, and vesicular transport]. 2.69846e-24	gi|566207017|ref|XP_002321716.2| hypothetical protein POPTR_0015s11180g [Populus trichocarpa] 1.5e-54	gi|743831104|ref|XM_011025661.1| PREDICTED: Populus euphratica HVA22-like protein e (LOC105125283), mRNA 0.0	pfam03134, TB2_DP1_HVA22, TB2/DP1, HVA22 family. This family includes members from a wide variety of eukaryotes. It includes the TB2/DP1 (deleted in polyposis) protein, which in humans is deleted in severe forms of familial adenomatous polyposis, an autosomal dominant oncological inherited disease. The family also includes the plant protein of known similarity to TB2/DP1, the HVA22 abscisic acid-…	sp|Q9FED2|HA22E_ARATH HVA22-like protein e OS=Arabidopsis thaliana GN=HVA22E PE=2 SV=1 3.28258e-37	tr|B9IFE9|B9IFE9_POPTR Predicted protein OS=Populus trichocarpa GN=POPTRDRAFT_776313 PE=4 SV=1 2.5e-51	GO:0006950, response to stress;GO:0009409, response to cold;GO:0009414, response to water deprivation;GO:0009737, response to abscisic acid;GO:0016021, integral component of membrane;GO:0042538, hyperosmotic salinity response	-
TRINITY_DN55471_c0_g2	2.86385	12.2013	-2.09101	1.43e-05	0.00100846	down	cd13999, STKc_MAP3K-like, Catalytic domain of Mitogen-Activated Protein Kinase (MAPK) Kinase Kinase-like Serine/Threonine kinases. STKs catalyze the transfer of the gamma-phosphoryl group from ATP to serine/threonine residues on protein substrates. This subfamily is composed mainly of MAP3Ks and similar proteins, including TGF-beta Activated Kinase-1 (TAK1, also called MAP3K7), MAP3K12, MAP3K13, …	KOG0192, KOG0192, KOG0192, Tyrosine kinase specific for activated (GTP-bound) p21cdc42Hs [Signal transduction mechanisms]. 6.89121e-21	gi|743908353|ref|XP_011047626.1| PREDICTED: serine/threonine-protein kinase HT1-like [Populus euphratica] 3.1e-169	gi|566178933|ref|XM_006380204.1| Populus trichocarpa hypothetical protein (POPTR_0007s00720g) mRNA, complete cds 0.0	pfam07714, Pkinase_Tyr, Protein tyrosine kinase. 2.30441e-13	sp|Q05609|CTR1_ARATH Serine/threonine-protein kinase CTR1 OS=Arabidopsis thaliana GN=CTR1 PE=1 SV=1 9.19292e-19	tr|B9IJ48|B9IJ48_POPTR Predicted protein OS=Populus trichocarpa GN=POPTRDRAFT_577280 PE=4 SV=1 3.3e-149	GO:0001666, response to hypoxia;GO:0004672, protein kinase activity;GO:0004674, protein serine/threonine kinase activity;GO:0004712, protein serine/threonine/tyrosine kinase activity;GO:0005524, ATP binding;GO:0005789, endoplasmic reticulum membrane;GO:0009686, gibberellin biosynthetic process;GO:0009723, response to ethylene;GO:0009744, response to sucrose;GO:0009750, response to fructose;GO:000…	-
TRINITY_DN49024_c0_g1	3.21369	13.4284	-2.06298	0.00121631	0.0279961	down	-	-	gi|743825738|ref|XP_011022620.1| PREDICTED: uncharacterized protein LOC105124334 [Populus euphratica] 1.4e-18	gi|743825737|ref|XM_011024318.1| PREDICTED: Populus euphratica uncharacterized LOC105124334 (LOC105124334), transcript variant X1, mRNA 0.0	-	-	tr|B9GWV4|B9GWV4_POPTR Predicted protein OS=Populus trichocarpa GN=POPTRDRAFT_757557 PE=4 SV=1 1.4e-17	GO:0005737, cytoplasm;GO:0030001, metal ion transport;GO:0046914, transition metal ion binding;GO:0046916, cellular transition metal ion homeostasis	-
TRINITY_DN55943_c0_g2	8.1438	1.96265	2.0529	0.000137395	0.00589828	up	-	-	gi|566195292|ref|XP_006377820.1| hypothetical protein POPTR_0011s13440g [Populus trichocarpa] 8.2e-20	gi|566195291|ref|XM_006377758.1| Populus trichocarpa hypothetical protein (POPTR_0011s13440g) mRNA, complete cds 9.49882e-71	-	-	tr|B9NEM2|B9NEM2_POPTR Predicted protein OS=Populus trichocarpa GN=POPTRDRAFT_789602 PE=4 SV=1 3.4e-20	-	-
TRINITY_DN46807_c2_g2	526.432	1603.96	-1.60732	0.000158181	0.00656206	down	PLN03172, PLN03172, chalcone synthase family protein; Provisional. 0.0	-	gi|87132969|gb|ABD24222.1| chalcone synthase [Populus alba] 3.4e-218	gi|566204229|ref|XM_002321045.2| Populus trichocarpa chalcone synthase family protein (POPTR_0014s14200g) mRNA, complete cds 0.0	pfam00195, Chal_sti_synt_N, Chalcone and stilbene synthases, N-terminal domain. The C-terminal domain of Chalcone synthase is reported to be structurally similar to domains in thiolase and beta-ketoacyl synthase. The differences in activity are accounted for by differences in this N-terminal domain. 6.91872e-117	sp|P51090|CHSY_VITVI Chalcone synthase OS=Vitis vinifera GN=CHS PE=2 SV=1 0.0	tr|Q2ENC4|Q2ENC4_POPAL Chalcone synthase OS=Populus alba GN=CHS PE=2 SV=1 1.4e-218	GO:0009058, biosynthetic process;GO:0009813, flavonoid biosynthetic process;GO:0016210, naringenin-chalcone synthase activity;GO:0016747, transferase activity, transferring acyl groups other than amino-acyl groups	K00660-ko00941 Flavonoid biosynthesis
TRINITY_DN44269_c0_g1	9.84653	4.42024	1.15549	0.00156749	0.0329754	up	PLN03216, PLN03216, actin depolymerizing factor; Provisional. 6.62001e-96	KOG1735, KOG1735, KOG1735, Actin depolymerizing factor [Cytoskeleton]. 3.79236e-50	gi|224078252|ref|XP_002305510.1| putative actin-depolymerizing factor family protein [Populus trichocarpa] 2.6e-78	gi|566167146|ref|XM_002305474.2| Populus trichocarpa putative actin-depolymerizing factor family protein (POPTR_0004s17950g) mRNA, complete cds 0.0	pfam00241, Cofilin_ADF, Cofilin/tropomyosin-type actin-binding protein. Severs actin filaments and binds to actin monomers. 6.71724e-24	sp|Q9ZNT3|ADF5_ARATH Actin-depolymerizing factor 5 OS=Arabidopsis thaliana GN=ADF5 PE=1 SV=1 1.50788e-86	tr|A9PD44|A9PD44_POPTR Predicted protein OS=Populus trichocarpa GN=POPTRDRAFT_713289 PE=2 SV=1 1.1e-78	GO:0005737, cytoplasm;GO:0005856, cytoskeleton;GO:0015629, actin cytoskeleton;GO:0030042, actin filament depolymerization	K05765-ko04810 Regulation of actin cytoskeleton
TRINITY_DN52288_c1_g1	2.36295	8.38509	-1.82724	0.0012217	0.0281036	down	-	-	-	-	-	-	-	-	-
TRINITY_DN52195_c0_g2	32.1511	3.62049	3.15061	0.000147741	0.00625009	up	pfam00182, Glyco_hydro_19, Chitinase class I. 2.78994e-131	KOG4742, KOG4742, KOG4742, Predicted chitinase [General function prediction only]. 1.16876e-74	gi|743905791|ref|XP_011046301.1| PREDICTED: endochitinase 2-like [Populus euphratica] 4.3e-172	gi|743905790|ref|XM_011047999.1| PREDICTED: Populus euphratica endochitinase 2-like (LOC105140949), mRNA 0.0	pfam00182, Glyco_hydro_19, Chitinase class I. 6.6654e-132	sp|Q39799|CHI1_GOSHI Endochitinase 1 OS=Gossypium hirsutum PE=3 SV=1 1.7823e-160	tr|B9H1P7|B9H1P7_POPTR Predicted protein OS=Populus trichocarpa GN=POPTRDRAFT_831333 PE=4 SV=1 3.4e-171	GO:0000272, polysaccharide catabolic process;GO:0004568, chitinase activity;GO:0005975, carbohydrate metabolic process;GO:0006032, chitin catabolic process;GO:0006952, defense response;GO:0008061, chitin binding;GO:0016998, cell wall macromolecule catabolic process	K20547-ko04016 MAPK signaling pathway - plant;ko00520 Amino sugar and nucleotide sugar metabolism
TRINITY_DN48863_c2_g1	22.6368	4.71533	2.26324	2.9e-07	4.36e-05	up	-	-	gi|566204690|ref|XP_002321209.2| hypothetical protein POPTR_0014s16890g [Populus trichocarpa] 1.8e-88	gi|566204687|ref|XM_002320500.2| Populus trichocarpa hypothetical protein (POPTR_0014s16880g) mRNA, complete cds 0.0	-	sp|Q8GUM4|Y3739_ARATH Uncharacterized membrane protein At3g27390 OS=Arabidopsis thaliana GN=At3g27390 PE=1 SV=2 5.90821e-47	tr|B9IAW2|B9IAW2_POPTR Predicted protein (Fragment) OS=Populus trichocarpa GN=POPTRDRAFT_247144 PE=4 SV=1 7.4e-89	GO:0005886, plasma membrane;GO:0010228, vegetative to reproductive phase transition of meristem;GO:0016021, integral component of membrane	-
TRINITY_DN46327_c0_g6	31.9577	12.5372	1.34995	0.000795461	0.0208319	up	-	-	gi|566203759|ref|XP_002320284.2| hypothetical protein POPTR_0014s11390g [Populus trichocarpa] 1.2e-185	gi|566203758|ref|XM_002320248.2| Populus trichocarpa hypothetical protein (POPTR_0014s11390g) mRNA, complete cds 0.0	-	-	tr|B9I9H1|B9I9H1_POPTR Predicted protein OS=Populus trichocarpa GN=POPTRDRAFT_572596 PE=4 SV=1 1.1e-185	GO:0005768, endosome;GO:0005802, trans-Golgi network;GO:0016021, integral component of membrane;GO:0020037, heme binding	-
TRINITY_DN58005_c2_g3	115.351	49.5356	1.2195	4.97e-05	0.00268566	up	PLN02196, PLN02196, abscisic acid 8'-hydroxylase. 3.50671e-27	-	gi|743876757|ref|XP_011035282.1| PREDICTED: abscisic acid 8'-hydroxylase 2 [Populus euphratica] 3.3e-33	gi|743876756|ref|XM_011036980.1| PREDICTED: Populus euphratica abscisic acid 8'-hydroxylase 2 (LOC105133136), mRNA 2.54277e-170	-	sp|O81077|ABAH2_ARATH Abscisic acid 8'-hydroxylase 2 OS=Arabidopsis thaliana GN=CYP707A2 PE=2 SV=1 1.95797e-30	tr|B9GJA3|B9GJA3_POPTR Predicted protein OS=Populus trichocarpa GN=POPTRDRAFT_797669 PE=2 SV=1 1.8e-33	GO:0004497, monooxygenase activity;GO:0005506, iron ion binding;GO:0009639, response to red or far red light;GO:0009687, abscisic acid metabolic process;GO:0010114, response to red light;GO:0010268, brassinosteroid homeostasis;GO:0010295, (+)-abscisic acid 8'-hydroxylase activity;GO:0016021, integral component of membrane;GO:0016125, sterol metabolic process;GO:0016132, brassinosteroid biosynthet…	-
TRINITY_DN45127_c0_g1	3.69088	15.2264	-2.04454	0.001095	0.0258146	down	-	-	-	gi|566182979|ref|XM_002312203.2| Populus trichocarpa C2 domain-containing family protein (POPTR_0008s08460g) mRNA, complete cds 0.0	-	-	-	-	-
TRINITY_DN57066_c1_g2	28.8412	82.0655	-1.50865	5.95e-05	0.00307977	down	cd07843, STKc_CDC2L1, Catalytic domain of the Serine/Threonine Kinase, Cell Division Cycle 2-like 1. STKs catalyze the transfer of the gamma-phosphoryl group from ATP to serine/threonine residues on protein substrates. CDC2L1, also called PITSLRE, exists in different isoforms which are named using the alias CDK11(p). The CDC2L1 gene produces two protein products, CDK11(p110) and CDK11(p58). CDC2L…	KOG0663, KOG0663, KOG0663, Protein kinase PITSLRE and related kinases [General function prediction only]. 4.47978e-45	gi|566197658|ref|XP_002318117.2| hypothetical protein POPTR_0012s09630g [Populus trichocarpa] 1.8e-219	gi|566197657|ref|XM_002318081.2| Populus trichocarpa hypothetical protein (POPTR_0012s09630g) mRNA, complete cds 0.0	pfam00069, Pkinase, Protein kinase domain. 1.32043e-12	sp|Q7XUF4|CDKG2_ORYSJ Cyclin-dependent kinase G-2 OS=Oryza sativa subsp. japonica GN=CDKG-2 PE=2 SV=2 6.44428e-62	tr|B9I3M7|B9I3M7_POPTR Predicted protein (Fragment) OS=Populus trichocarpa GN=POPTRDRAFT_773148 PE=2 SV=1 1.3e-123	GO:0004693, cyclin-dependent protein serine/threonine kinase activity;GO:0005524, ATP binding;GO:0008353, RNA polymerase II carboxy-terminal domain kinase activity;GO:0016020, membrane	-
TRINITY_DN45009_c0_g1	100.558	12.7687	2.97735	0.00199662	0.0383659	up	pfam00011, HSP20, Hsp20/alpha crystallin family. Not only do small heat-shock-proteins occur in eukaryotes and prokaryotes but they have also now been shown to occur in cyanobacterial phages as well as their bacterial hosts. 1.96757e-13	KOG0710, KOG0710, KOG0710, Molecular chaperone (small heat-shock protein Hsp26/Hsp42) [Posttranslational modification, protein turnover, chaperones]. 5.45904e-15	gi|566189392|ref|XP_002314566.2| hypothetical protein POPTR_0010s06320g [Populus trichocarpa] 2.5e-113	gi|566189391|ref|XM_002314530.2| Populus trichocarpa hypothetical protein (POPTR_0010s06320g) mRNA, complete cds 0.0	pfam00011, HSP20, Hsp20/alpha crystallin family. Not only do small heat-shock-proteins occur in eukaryotes and prokaryotes but they have also now been shown to occur in cyanobacterial phages as well as their bacterial hosts. 4.7007e-14	sp|P31170|HS25P_ARATH 25.3 kDa heat shock protein, chloroplastic OS=Arabidopsis thaliana GN=HSP25.3 PE=2 SV=1 1.92766e-37	tr|B9HTE1|B9HTE1_POPTR Predicted protein OS=Populus trichocarpa GN=POPTRDRAFT_769024 PE=3 SV=1 4.4e-96	GO:0009408, response to heat;GO:0009507, chloroplast;GO:0009644, response to high light intensity;GO:0042542, response to hydrogen peroxide	K13993-ko04141 Protein processing in endoplasmic reticulum
TRINITY_DN47449_c0_g2	67.4601	230.458	-1.7724	0.00129925	0.0294109	down	-	-	gi|224100287|ref|XP_002311816.1| hypothetical protein POPTR_0008s20250g [Populus trichocarpa] 2.6e-70	gi|566185015|ref|XM_002311780.2| Populus trichocarpa hypothetical protein (POPTR_0008s20250g) mRNA, complete cds 0.0	-	-	tr|B9HM93|B9HM93_POPTR Predicted protein OS=Populus trichocarpa GN=POPTRDRAFT_565281 PE=4 SV=1 1.1e-70	-	-
TRINITY_DN56132_c1_g3	6.88269	37.0732	-2.42933	9.23e-05	0.00434764	down	-	-	-	gi|566158852|ref|XM_002301500.2| Populus trichocarpa phosphatase 2C family protein (POPTR_0002s19100g) mRNA, complete cds 6.73523e-85	-	-	-	-	-
TRINITY_DN57855_c0_g2	1.25248	9.56567	-2.93308	0.00176424	0.0355271	down	-	-	gi|147866421|emb|CAN81976.1| hypothetical protein VITISV_039521 [Vitis vinifera] 5.0e-08	gi|566192432|ref|XM_002315307.2| Populus trichocarpa hypothetical protein (POPTR_0010s23760g) mRNA, complete cds 1.11902e-33	-	-	tr|A5CA54|A5CA54_VITVI Putative uncharacterized protein OS=Vitis vinifera GN=VITISV_039521 PE=4 SV=1 2.1e-08	GO:0008270, zinc ion binding	-
TRINITY_DN46473_c1_g2	3.89704	14.0343	-1.84851	4.92e-05	0.00266504	down	pfam01190, Pollen_Ole_e_I, Pollen proteins Ole e I like. 1.34655e-12	-	gi|566164897|ref|XP_002305791.2| hypothetical protein POPTR_0004s04450g [Populus trichocarpa] 2.2e-70	gi|566164896|ref|XM_002305755.2| Populus trichocarpa hypothetical protein (POPTR_0004s04450g) mRNA, complete cds 0.0	pfam01190, Pollen_Ole_e_I, Pollen proteins Ole e I like. 3.21701e-13	sp|Q9FZA2|AGP31_ARATH Non-classical arabinogalactan protein 31 OS=Arabidopsis thaliana GN=AGP31 PE=1 SV=1 2.84037e-37	tr|A9P945|A9P945_POPTR Putative uncharacterized protein OS=Populus trichocarpa PE=2 SV=1 9.3e-71	GO:0005199, structural constituent of cell wall;GO:0005576, extracellular region;GO:0005886, plasma membrane;GO:0009505, plant-type cell wall;GO:0009506, plasmodesma;GO:0009753, response to jasmonic acid	-
TRINITY_DN51536_c0_g1	29.7457	2.41317	3.62368	0.000290256	0.0102023	up	-	-	-	gi|566155814|ref|XM_002301934.2| Populus trichocarpa hypothetical protein (POPTR_0002s02220g) mRNA, complete cds 0.0	-	-	-	-	-
TRINITY_DN49457_c0_g2	2.57261	8.93002	-1.79543	0.00226876	0.0417944	down	cd09218, TLP-PA, allergenic/antifungal thaumatin-like proteins: plant and animal homologs. This subfamily is represented by the thaumatin-like proteins (TLPs), Cherry Allergen Pru Av 2 TLP, Peach PpAZ44 TLP (a propylene-induced TLP in abscission), the Caenorhabditis elegans thaumatin family member (thn-6), and other plant and animal homologs. TLPs are involved in host defense and a wide range of …	-	gi|566173327|ref|XP_002306938.2| pathogenesis-related thaumatin family protein [Populus trichocarpa] 1.4e-174	gi|566173326|ref|XM_002306902.2| Populus trichocarpa pathogenesis-related thaumatin family protein (POPTR_0005s26240g) mRNA, complete cds 0.0	pfam00314, Thaumatin, Thaumatin family. 5.25212e-84	sp|P83332|TLP1_PRUPE Thaumatin-like protein 1 OS=Prunus persica PE=2 SV=1 4.90375e-86	tr|B9H4Z3|B9H4Z3_POPTR Predicted protein (Fragment) OS=Populus trichocarpa GN=POPTRDRAFT_206413 PE=4 SV=1 2.5e-162	GO:0005576, extracellular region;GO:0006952, defense response	-
TRINITY_DN51733_c0_g1	34.4189	14.6274	1.23452	1.37e-05	0.000982398	up	PLN03070, PLN03070, photosystem I reaction center subunit psaK 247; Provisional. 9.28237e-38	-	gi|224092476|ref|XP_002309626.1| Photosystem I reaction center subunit psaK family protein [Populus trichocarpa] 1.9e-22	gi|566213702|ref|XM_006371681.1| Populus trichocarpa Photosystem I reaction center subunit psaK family protein (POPTR_0018s01720g) mRNA, complete cds 1.70834e-148	-	sp|Q9SUI5|PSAK_ARATH Photosystem I reaction center subunit psaK, chloroplastic OS=Arabidopsis thaliana GN=PSAK PE=2 SV=2 1.46429e-35	tr|B9HA54|B9HA54_POPTR Predicted protein OS=Populus trichocarpa GN=POPTRDRAFT_802453 PE=4 SV=1 8.0e-23	GO:0009507, chloroplast;GO:0009522, photosystem I;GO:0009534, chloroplast thylakoid;GO:0009535, chloroplast thylakoid membrane;GO:0009579, thylakoid;GO:0015979, photosynthesis;GO:0016021, integral component of membrane;GO:0016168, chlorophyll binding	-
TRINITY_DN51733_c0_g2	558.339	242.215	1.20485	4.76e-06	0.000425197	up	TIGR03050, PS_I_psaK_plant, photosystem I reaction center PsaK, plant form. This protein family is based on a model that separates the photosystem I PsaK subunit of chloroplasts from chloroplast PsaG protein and from Cyanobacterial PsaK, both of which show sequence similarity. 8.87049e-32	-	gi|224092476|ref|XP_002309626.1| Photosystem I reaction center subunit psaK family protein [Populus trichocarpa] 3.4e-23	gi|566178357|ref|XM_002309590.2| Populus trichocarpa Photosystem I reaction center subunit psaK family protein (POPTR_0006s27030g) mRNA, complete cds 1.81253e-180	-	sp|Q9SUI5|PSAK_ARATH Photosystem I reaction center subunit psaK, chloroplastic OS=Arabidopsis thaliana GN=PSAK PE=2 SV=2 2.56014e-29	tr|A9PJA5|A9PJA5_9ROSI Putative uncharacterized protein OS=Populus trichocarpa x Populus deltoides PE=2 SV=1 1.4e-23	GO:0009507, chloroplast;GO:0009522, photosystem I;GO:0009534, chloroplast thylakoid;GO:0009535, chloroplast thylakoid membrane;GO:0009579, thylakoid;GO:0015979, photosynthesis;GO:0016021, integral component of membrane;GO:0016168, chlorophyll binding	-
TRINITY_DN42033_c0_g1	10.7295	1.17323	3.19302	6.17e-17	1.89e-13	up	-	-	-	gi|743845234|ref|XR_842691.1| PREDICTED: Populus euphratica uncharacterized LOC105127733 (LOC105127733), ncRNA 0.0	-	-	-	-	-
TRINITY_DN47083_c1_g1	0.691536	8.92957	-3.69071	2.41e-10	1.01e-07	down	PLN00050, PLN00050, expansin A; Provisional. 1.84428e-34	-	gi|429326520|gb|AFZ78600.1| expansin protein [Populus tomentosa] 1.1e-34	gi|566183025|ref|XM_002312217.2| Populus trichocarpa expansin 4 family protein (POPTR_0008s08790g) mRNA, complete cds 0.0	pfam01357, Pollen_allerg_1, Pollen allergen. This family contains allergens lol PI, PII and PIII from Lolium perenne. 3.34195e-16	sp|Q9LDR9|EXP10_ARATH Expansin-A10 OS=Arabidopsis thaliana GN=EXPA10 PE=2 SV=1 1.07001e-35	tr|L0AUS8|L0AUS8_POPTO Expansin protein OS=Populus tomentosa PE=3 SV=1 4.4e-35	GO:0005576, extracellular region;GO:0005618, cell wall;GO:0009664, plant-type cell wall organization;GO:0016020, membrane	-
TRINITY_DN53827_c0_g2	16.4634	60.9198	-1.88765	0.00085862	0.0218935	down	-	-	gi|743811602|ref|XP_011019055.1| PREDICTED: uncharacterized protein LOC105121895 [Populus euphratica] 3.7e-288	gi|743811601|ref|XM_011020753.1| PREDICTED: Populus euphratica uncharacterized LOC105121895 (LOC105121895), mRNA 0.0	-	-	tr|B9HD83|B9HD83_POPTR Predicted protein OS=Populus trichocarpa GN=POPTRDRAFT_560959 PE=4 SV=1 1.4e-297	GO:0005737, cytoplasm;GO:0008757, S-adenosylmethionine-dependent methyltransferase activity;GO:0032259, methylation	-
TRINITY_DN55588_c0_g2	0.806598	5.98404	-2.8912	0.000570787	0.0165335	down	pfam00931, NB-ARC, NB-ARC domain. 3.90689e-23	KOG4658, KOG4658, KOG4658, Apoptotic ATPase [Signal transduction mechanisms]. 1.13485e-54	gi|224144475|ref|XP_002325301.1| hypothetical protein POPTR_0019s00570g [Populus trichocarpa] 1.4e-174	gi|224144474|ref|XM_002325265.1| Populus trichocarpa hypothetical protein (POPTR_0019s00570g) mRNA, complete cds 0.0	pfam00931, NB-ARC, NB-ARC domain. 9.33389e-24	sp|Q8L3R3|RFL1_ARATH Disease resistance protein RFL1 OS=Arabidopsis thaliana GN=RFL1 PE=3 SV=2 5.04463e-57	tr|B9IP17|B9IP17_POPTR BED finger-nbs-lrr resistance protein OS=Populus trichocarpa GN=POPTRDRAFT_665212 PE=4 SV=1 5.9e-175	GO:0003677, DNA binding;GO:0005524, ATP binding;GO:0006952, defense response;GO:0009617, response to bacterium;GO:0043531, ADP binding	K20599-ko04016 MAPK signaling pathway - plant
TRINITY_DN51277_c1_g5	5.32698	41.3996	-2.95823	3.27e-06	0.000316043	down	-	-	gi|224135737|ref|XP_002322148.1| hypothetical protein POPTR_0015s08200g [Populus trichocarpa] 1.4e-37	gi|566254970|ref|XM_006387581.1| Populus trichocarpa hypothetical protein (POPTR_0729s00200g) mRNA, complete cds 0.0	-	-	tr|B9IEL5|B9IEL5_POPTR Predicted protein OS=Populus trichocarpa GN=POPTRDRAFT_666406 PE=4 SV=1 5.8e-38	-	-
TRINITY_DN57558_c2_g2	93.0591	381.18	-2.03425	0.00256242	0.0457092	down	PTZ00009, PTZ00009, heat shock 70 kDa protein; Provisional. 1.95582e-06	KOG0101, KOG0101, KOG0101, Molecular chaperones HSP70/HSC70, HSP70 superfamily [Posttranslational modification, protein turnover, chaperones]. 7.86067e-07	gi|566191989|ref|XP_006378714.1| heat shock protein 70 cognate [Populus trichocarpa] 1.6e-07	gi|566191988|ref|XM_006378652.1| Populus trichocarpa heat shock protein 70 cognate (POPTR_0010s21270g) mRNA, complete cds 4.56561e-86	-	sp|P29357|HSP7E_SPIOL Chloroplast envelope membrane 70 kDa heat shock-related protein OS=Spinacia oleracea GN=SCE70 PE=1 SV=3 2.04609e-10	tr|A9PCA4|A9PCA4_POPTR Putative uncharacterized protein OS=Populus trichocarpa PE=2 SV=1 6.8e-08	GO:0005524, ATP binding;GO:0031969, chloroplast membrane	-
TRINITY_DN58039_c5_g5	1.18202	5.332	-2.17342	0.00152334	0.0324996	down	-	KOG0889, KOG0889, KOG0889, Histone acetyltransferase SAGA, TRRAP/TRA1 component, PI-3 kinase superfamily [Signal transduction mechanisms, Chromatin structure and dynamics, Replication, recombination and repair, Cell cycle control, cell division, chromosome partitioning]. 8.10619e-35	gi|743899812|ref|XP_011043196.1| PREDICTED: LOW QUALITY PROTEIN: transcription-associated protein 1 [Populus euphratica] 3.1e-97	gi|566170834|ref|XM_002307314.2| Populus trichocarpa FAT domain-containing family protein (POPTR_0005s11640g) mRNA, complete cds 0.0	-	sp|Q8I8U7|TRA1_DROME Transcription-associated protein 1 OS=Drosophila melanogaster GN=Nipped-A PE=1 SV=3 3.45342e-20	tr|B9MXG3|B9MXG3_POPTR Predicted protein OS=Populus trichocarpa GN=POPTRDRAFT_827059 PE=4 SV=1 8.3e-97	GO:0000123, histone acetyltransferase complex;GO:0000124, SAGA complex;GO:0000281, mitotic cytokinesis;GO:0004672, protein kinase activity;GO:0005634, nucleus;GO:0005700, polytene chromosome;GO:0005703, polytene chromosome puff;GO:0005737, cytoplasm;GO:0005875, microtubule associated complex;GO:0006281, DNA repair;GO:0006351, transcription, DNA-templated;GO:0006355, regulation of transcription, D…	-
TRINITY_DN58039_c5_g2	1.72243	5.88972	-1.77375	0.00260443	0.0461878	down	-	KOG0889, KOG0889, KOG0889, Histone acetyltransferase SAGA, TRRAP/TRA1 component, PI-3 kinase superfamily [Signal transduction mechanisms, Chromatin structure and dynamics, Replication, recombination and repair, Cell cycle control, cell division, chromosome partitioning]. 6.97604e-80	gi|566170835|ref|XP_002307350.2| FAT domain-containing family protein [Populus trichocarpa] 2.4e-240	gi|566170834|ref|XM_002307314.2| Populus trichocarpa FAT domain-containing family protein (POPTR_0005s11640g) mRNA, complete cds 0.0	-	sp|Q8I8U7|TRA1_DROME Transcription-associated protein 1 OS=Drosophila melanogaster GN=Nipped-A PE=1 SV=3 2.56082e-49	tr|B9MXG3|B9MXG3_POPTR Predicted protein OS=Populus trichocarpa GN=POPTRDRAFT_827059 PE=4 SV=1 9.9e-241	GO:0000123, histone acetyltransferase complex;GO:0000124, SAGA complex;GO:0000281, mitotic cytokinesis;GO:0004672, protein kinase activity;GO:0005634, nucleus;GO:0005700, polytene chromosome;GO:0005703, polytene chromosome puff;GO:0005737, cytoplasm;GO:0005875, microtubule associated complex;GO:0006281, DNA repair;GO:0006351, transcription, DNA-templated;GO:0006355, regulation of transcription, D…	-
TRINITY_DN57709_c2_g1	2.04819	7.42569	-1.85818	0.00230836	0.0423789	down	-	KOG1824, KOG1824, KOG1824, TATA-binding protein-interacting protein [General function prediction only]. 9.6548e-45	gi|566168333|ref|XP_006385092.1| TIP120 family protein [Populus trichocarpa] 7.4e-119	gi|566168332|ref|XM_006385030.1| Populus trichocarpa TIP120 family protein (POPTR_0004s23820g) mRNA, complete cds 0.0	-	sp|Q8L5Y6|CAND1_ARATH Cullin-associated NEDD8-dissociated protein 1 OS=Arabidopsis thaliana GN=CAND1 PE=1 SV=1 5.36327e-111	tr|B9N0I8|B9N0I8_POPTR Predicted protein OS=Populus trichocarpa GN=POPTRDRAFT_827477 PE=4 SV=1 3.1e-119	GO:0005618, cell wall;GO:0005634, nucleus;GO:0005829, cytosol;GO:0005886, plasma membrane;GO:0006351, transcription, DNA-templated;GO:0006355, regulation of transcription, DNA-templated;GO:0009733, response to auxin;GO:0010051, xylem and phloem pattern formation;GO:0010228, vegetative to reproductive phase transition of meristem;GO:0010265, SCF complex assembly;GO:0016567, protein ubiquitination	-
TRINITY_DN52796_c0_g3	99.7467	32.7342	1.60747	1.8e-06	0.000194719	up	PLN02912, PLN02912, oxidoreductase, 2OG-Fe(II) oxygenase family protein. 1.5772e-18	KOG0143, KOG0143, KOG0143, Iron/ascorbate family oxidoreductases [Secondary metabolites biosynthesis, transport and catabolism, General function prediction only]. 2.66279e-14	gi|566195630|ref|XP_002317048.2| hypothetical protein POPTR_0011s15340g [Populus trichocarpa] 1.8e-40	gi|566195629|ref|XM_002317012.2| Populus trichocarpa hypothetical protein (POPTR_0011s15340g) mRNA, complete cds 0.0	-	sp|Q9ZSA7|DLO2_ARATH Protein DMR6-LIKE OXYGENASE 2 OS=Arabidopsis thaliana GN=DLO2 PE=2 SV=1 1.10744e-16	tr|B9I0Q6|B9I0Q6_POPTR Predicted protein OS=Populus trichocarpa GN=POPTRDRAFT_889479 PE=3 SV=1 7.7e-41	GO:0002229, defense response to oomycetes;GO:0046244, salicylic acid catabolic process;GO:0046872, metal ion binding;GO:0051213, dioxygenase activity	-
TRINITY_DN52796_c0_g1	3.46119	11.6158	-1.74675	0.00231825	0.0424616	down	PLN02639, PLN02639, oxidoreductase, 2OG-Fe(II) oxygenase family protein. 1.06438e-43	KOG0143, KOG0143, KOG0143, Iron/ascorbate family oxidoreductases [Secondary metabolites biosynthesis, transport and catabolism, General function prediction only]. 5.52094e-36	gi|743894730|ref|XP_011040622.1| PREDICTED: flavonol synthase/flavanone 3-hydroxylase-like [Populus euphratica] 9.0e-73	gi|743894731|ref|XM_011042321.1| PREDICTED: Populus euphratica flavonol synthase/flavanone 3-hydroxylase-like (LOC105136831), mRNA 0.0	pfam03171, 2OG-FeII_Oxy, 2OG-Fe(II) oxygenase superfamily. This family contains members of the 2-oxoglutarate (2OG) and Fe(II)-dependent oxygenase superfamily. This family includes the C-terminal of prolyl 4-hydroxylase alpha subunit. The holoenzyme has the activity EC:1.14.11.2 catalysing the reaction: Procollagen L-proline + 2-oxoglutarate + O2 <=; procollagen trans- 4-hydroxy-L-proline + succi…	sp|Q9ZSA8|DLO1_ARATH Protein DMR6-LIKE OXYGENASE 1 OS=Arabidopsis thaliana GN=DLO1 PE=1 SV=1 7.05191e-42	tr|B9I0Q4|B9I0Q4_POPTR Predicted protein OS=Populus trichocarpa GN=POPTRDRAFT_569251 PE=3 SV=1 1.1e-72	GO:0002229, defense response to oomycetes;GO:0002239, response to oomycetes;GO:0009617, response to bacterium;GO:0009620, response to fungus;GO:0009751, response to salicylic acid;GO:0010150, leaf senescence;GO:0046244, salicylic acid catabolic process;GO:0046872, metal ion binding;GO:0051213, dioxygenase activity	-
TRINITY_DN51533_c2_g3	53.1562	22.9816	1.20976	4.23e-05	0.00236333	up	-	-	-	gi|566174037|ref|XM_006380865.1| Populus trichocarpa hypothetical protein (POPTR_0006s02070g) mRNA, complete cds 0.0	-	-	-	-	-
TRINITY_DN54082_c0_g1	12.4896	28.0622	-1.1679	0.00202527	0.0387074	down	TIGR00717, 30S_ribosomal_protein_S1, ribosomal protein S1. This model describes ribosomal protein S1, RpsA. This protein is found in most bacterial genomes in a single copy, but is not present in the Mycoplasmas. It is heterogeneous with respect to the number of repeats of the S1 RNA binding domain described by pfam00575: six repeats in E. coli and most other bacteria, four in Bacillus subtilis a…	-	gi|743826156|ref|XP_011022733.1| PREDICTED: uncharacterized protein LOC105124413 isoform X1 [Populus euphratica] 0.0e+00	gi|743826155|ref|XM_011024431.1| PREDICTED: Populus euphratica uncharacterized LOC105124413 (LOC105124413), transcript variant X1, mRNA 0.0	-	sp|Q9JZ44|RS1_NEIMB 30S ribosomal protein S1 OS=Neisseria meningitidis serogroup B (strain MC58) GN=rpsA PE=1 SV=1 8.93932e-18	tr|B9GWF8|B9GWF8_POPTR Predicted protein OS=Populus trichocarpa GN=POPTRDRAFT_757477 PE=2 SV=1 0.0e+00	GO:0003723, RNA binding;GO:0003735, structural constituent of ribosome;GO:0005730, nucleolus;GO:0005840, ribosome;GO:0006412, translation;GO:0009507, chloroplast;GO:0032040, small-subunit processome	-
TRINITY_DN51569_c0_g2	26.1386	11.226	1.21934	6.21e-05	0.00318184	up	pfam04739, AMPKBI, 5'-AMP-activated protein kinase beta subunit, interaction domain. This region is found in the beta subunit of the 5'-AMP-activated protein kinase complex, and its yeast homologues Sip1, Sip2 and Gal83, which are found in the SNF1 kinase complex. This region is sufficient for interaction of this subunit with the kinase complex, but is not solely responsible for the interaction, …	KOG1616, KOG1616, KOG1616, Protein involved in Snf1 protein kinase complex assembly [Carbohydrate transport and metabolism]. 4.04635e-08	gi|566150423|ref|XP_002298290.2| hypothetical protein POPTR_0001s22800g [Populus trichocarpa] 2.7e-47	gi|114158739|gb|AC184074.2| Populus trichocarpa clone Pop1-51H15, complete sequence 0.0	pfam04739, AMPKBI, 5'-AMP-activated protein kinase beta subunit, interaction domain. This region is found in the beta subunit of the 5'-AMP-activated protein kinase complex, and its yeast homologues Sip1, Sip2 and Gal83, which are found in the SNF1 kinase complex. This region is sufficient for interaction of this subunit with the kinase complex, but is not solely responsible for the interaction, …	sp|Q84VQ1|KINB1_ARATH SNF1-related protein kinase regulatory subunit beta-1 OS=Arabidopsis thaliana GN=KINB1 PE=1 SV=1 7.97696e-39	tr|B9GI22|B9GI22_POPTR Predicted protein (Fragment) OS=Populus trichocarpa GN=POPTRDRAFT_172135 PE=4 SV=1 1.1e-47	GO:0005524, ATP binding;GO:0005975, carbohydrate metabolic process;GO:0006633, fatty acid biosynthetic process;GO:0009744, response to sucrose;GO:0042128, nitrate assimilation;GO:0043562, cellular response to nitrogen levels	-
TRINITY_DN51569_c0_g1	49.1742	20.6676	1.25053	0.000477095	0.0145688	up	pfam16561, AMPK1_CBM, Glycogen recognition site of AMP-activated protein kinase. AMPK1_CBM is a family found in close association with AMPKBI pfam04739. The surface of AMPK1_CBM reveals a carbohydrate-binding pocket. 2.46878e-06	-	gi|566150423|ref|XP_002298290.2| hypothetical protein POPTR_0001s22800g [Populus trichocarpa] 2.0e-54	gi|566150422|ref|XM_002298254.2| Populus trichocarpa hypothetical protein (POPTR_0001s22800g) mRNA, complete cds 0.0	pfam16561, AMPK1_CBM, Glycogen recognition site of AMP-activated protein kinase. AMPK1_CBM is a family found in close association with AMPKBI pfam04739. The surface of AMPK1_CBM reveals a carbohydrate-binding pocket. 5.24066e-07	sp|Q84VQ1|KINB1_ARATH SNF1-related protein kinase regulatory subunit beta-1 OS=Arabidopsis thaliana GN=KINB1 PE=1 SV=1 7.56187e-27	tr|B9GI22|B9GI22_POPTR Predicted protein (Fragment) OS=Populus trichocarpa GN=POPTRDRAFT_172135 PE=4 SV=1 1.1e-41	GO:0005524, ATP binding;GO:0005975, carbohydrate metabolic process;GO:0006633, fatty acid biosynthetic process;GO:0009744, response to sucrose;GO:0042128, nitrate assimilation;GO:0043562, cellular response to nitrogen levels	-
TRINITY_DN39772_c0_g1	43.8799	16.7824	1.38661	9.07e-05	0.00430429	up	-	-	gi|224088454|ref|XP_002308454.1| hypothetical protein POPTR_0006s22410g [Populus trichocarpa] 2.9e-25	gi|566177581|ref|XM_002308418.2| Populus trichocarpa hypothetical protein (POPTR_0006s22410g) mRNA, complete cds 0.0	-	-	tr|B9HBW2|B9HBW2_POPTR Predicted protein OS=Populus trichocarpa GN=POPTRDRAFT_561457 PE=4 SV=1 1.2e-25	-	-
TRINITY_DN52328_c0_g4	11.115	3.56041	1.64239	9.21e-05	0.00434356	up	-	-	gi|566169992|ref|XP_002306292.2| hypothetical protein POPTR_0005s07300g [Populus trichocarpa] 9.7e-85	gi|566169991|ref|XM_002306256.2| Populus trichocarpa hypothetical protein (POPTR_0005s07300g) mRNA, complete cds 0.0	-	-	tr|B9H4Q6|B9H4Q6_POPTR Predicted protein OS=Populus trichocarpa GN=POPTRDRAFT_558495 PE=4 SV=1 4.7e-73	-	-
TRINITY_DN55235_c0_g1	3.50074	10.7478	-1.6183	0.000707262	0.0190916	down	pfam04782, DUF632, Protein of unknown function (DUF632). This plant protein may be a leucine zipper, but there is no experimental evidence for this. 7.93342e-67	-	gi|743911084|ref|XP_010999400.1| PREDICTED: uncharacterized protein LOC105107244 [Populus euphratica] 3.4e-207	gi|743911083|ref|XM_011001098.1| PREDICTED: Populus euphratica uncharacterized LOC105107244 (LOC105107244), mRNA 0.0	pfam04782, DUF632, Protein of unknown function (DUF632). This plant protein may be a leucine zipper, but there is no experimental evidence for this. 1.89536e-67	-	tr|B9H7G0|B9H7G0_POPTR Predicted protein OS=Populus trichocarpa GN=POPTRDRAFT_1078520 PE=4 SV=1 1.3e-184	-	-
TRINITY_DN55281_c1_g3	5.08625	17.2606	-1.7628	0.00149567	0.0322792	down	PLN02436, PLN02436, cellulose synthase A. 0.0	-	gi|743901833|ref|XP_011044242.1| PREDICTED: cellulose synthase A catalytic subunit 2 [UDP-forming]-like [Populus euphratica] 4.7e-270	gi|566172554|ref|XM_002306671.2| Populus trichocarpa CesA7A-like family protein (POPTR_0005s21620g) mRNA, complete cds 0.0	pfam03552, Cellulose_synt, Cellulose synthase. Cellulose, an aggregate of unbranched polymers of beta-1,4-linked glucose residues, is the major component of wood and thus paper, and is synthesized by plants, most algae, some bacteria and fungi, and even some animals. The genes that synthesize cellulose in higher plants differ greatly from the well-characterized genes found in Acetobacter and Agro…	sp|Q9SJ22|CESA9_ARATH Probable cellulose synthase A catalytic subunit 9 [UDP-forming] OS=Arabidopsis thaliana GN=CESA9 PE=2 SV=1 0.0	tr|B9GTH4|B9GTH4_POPTR Cellulose synthase OS=Populus trichocarpa GN=POPTRDRAFT_551308 PE=4 SV=1 2.6e-270	GO:0005886, plasma membrane;GO:0008270, zinc ion binding;GO:0010214, seed coat development;GO:0016021, integral component of membrane;GO:0016760, cellulose synthase (UDP-forming) activity;GO:0030244, cellulose biosynthetic process;GO:0046872, metal ion binding;GO:0071555, cell wall organization	-
TRINITY_DN49444_c0_g1	47.2677	23.2415	1.02415	0.000513849	0.0153196	up	PLN03220, PLN03220, uncharacterized protein; Provisional. 6.47691e-15	-	gi|224127334|ref|XP_002320048.1| hypothetical protein POPTR_0014s06240g [Populus trichocarpa] 1.2e-96	gi|566202895|ref|XM_002320012.2| Populus trichocarpa hypothetical protein (POPTR_0014s06240g) mRNA, complete cds 0.0	pfam02519, Auxin_inducible, Auxin responsive protein. This family consists of the protein products of the ARG7 auxin responsive genes family none of which have any identified functional role. 2.61093e-15	sp|O22150|SAU36_ARATH Auxin-responsive protein SAUR36 OS=Arabidopsis thaliana GN=SAUR36 PE=2 SV=1 3.64212e-47	tr|B9IBX4|B9IBX4_POPTR SAUR family protein OS=Populus trichocarpa GN=SAUR21 PE=4 SV=1 4.9e-97	GO:0005634, nucleus;GO:0007275, multicellular organism development;GO:0009733, response to auxin;GO:0009734, auxin-activated signaling pathway;GO:0010029, regulation of seed germination;GO:0040008, regulation of growth;GO:1900057, positive regulation of leaf senescence	K14488-ko04075 Plant hormone signal transduction
TRINITY_DN52000_c0_g2	61.3752	20.8861	1.55511	2.76e-08	6.15e-06	up	cd13132, MATE_eukaryotic, Eukaryotic members of the multidrug and toxic compound extrusion (MATE) family. The integral membrane proteins from the MATE family are involved in exporting metabolites across the cell membrane and are responsible for multidrug resistance (MDR) in many bacteria and animals. MATE has also been identified as a large multigene family in plants, where the proteins are linke…	KOG1347, KOG1347, KOG1347, Uncharacterized membrane protein, predicted efflux pump [General function prediction only]. 2.39168e-63	gi|224067013|ref|XP_002302326.1| hypothetical protein POPTR_0002s10250g [Populus trichocarpa] 1.8e-166	gi|566157248|ref|XM_002302290.2| Populus trichocarpa hypothetical protein (POPTR_0002s10250g) mRNA, complete cds 0.0	pfam01554, MatE, MatE. The MatE domain. 3.17457e-12	sp|Q9FKQ1|DTX27_ARATH Protein DETOXIFICATION 27 OS=Arabidopsis thaliana GN=DTX27 PE=2 SV=1 4.15829e-138	tr|B9GV15|B9GV15_POPTR Predicted protein OS=Populus trichocarpa GN=POPTRDRAFT_830240 PE=4 SV=1 7.5e-167	GO:0006855, drug transmembrane transport;GO:0015238, drug transmembrane transporter activity;GO:0015297, antiporter activity;GO:0016021, integral component of membrane	-
TRINITY_DN43196_c0_g1	40.8387	12.6997	1.68515	0.000181806	0.0072675	up	pfam04800, ETC_C1_NDUFA4, ETC complex I subunit conserved region. Family of pankaryotic NADH-ubiquinone oxidoreductase subunits (EC:1.6.5.3) (EC:1.6.99.3) from complex I of the electron transport chain initially identified in Neurospora crassa as a 21 kDa protein. 1.64107e-18	KOG3389, KOG3389, KOG3389, NADH:ubiquinone oxidoreductase, NDUFS4/18 kDa subunit [Energy production and conversion]. 7.65898e-31	gi|566157542|ref|XP_002302404.2| hypothetical protein POPTR_0002s11860g [Populus trichocarpa] 2.0e-40	gi|743938619|ref|XM_011015444.1| PREDICTED: Populus euphratica NADH dehydrogenase [ubiquinone] iron-sulfur protein 4, mitochondrial-like (LOC105117696), transcript variant X2, mRNA 6.05462e-121	pfam04800, ETC_C1_NDUFA4, ETC complex I subunit conserved region. Family of pankaryotic NADH-ubiquinone oxidoreductase subunits (EC:1.6.5.3) (EC:1.6.99.3) from complex I of the electron transport chain initially identified in Neurospora crassa as a 21 kDa protein. 3.92067e-19	sp|Q9FJW4|NDUS4_ARATH NADH dehydrogenase [ubiquinone] iron-sulfur protein 4, mitochondrial OS=Arabidopsis thaliana GN=FRO1 PE=2 SV=1 4.57486e-43	tr|B9GNN9|B9GNN9_POPTR Predicted protein (Fragment) OS=Populus trichocarpa GN=POPTRDRAFT_409930 PE=4 SV=1 8.4e-41	GO:0005739, mitochondrion;GO:0005747, mitochondrial respiratory chain complex I;GO:0006970, response to osmotic stress;GO:0008137, NADH dehydrogenase (ubiquinone) activity;GO:0009631, cold acclimation;GO:0016651, oxidoreductase activity, acting on NAD(P)H;GO:0022900, electron transport chain;GO:0050897, cobalt ion binding	K03937-ko00190 Oxidative phosphorylation
TRINITY_DN51248_c0_g1	2.84024	19.1428	-2.75272	0.000438341	0.0136943	down	-	-	gi|743943324|ref|XP_011016168.1| PREDICTED: uncharacterized protein LOC105119699 [Populus euphratica] 2.6e-13	gi|158749688|gb|AC213418.1| Populus trichocarpa clone POP021-F23, complete sequence 2.92799e-128	-	-	-	-	-
TRINITY_DN55460_c1_g1	43.5868	21.6945	1.00656	0.00198829	0.0382745	up	cd14663, STKc_SnRK3, Catalytic domain of the Serine/Threonine Kinases, Sucrose nonfermenting 1-related protein kinase subfamily 3. STKs catalyze the transfer of the gamma-phosphoryl group from ATP to serine/threonine residues on protein substrates. The SnRKs form three different subfamilies designated SnRK1-3. SnRK3 is represented in this cd. The SnRK3 group contains members also known as CBL-int…	KOG0583, KOG0583, KOG0583, Serine/threonine protein kinase [Signal transduction mechanisms]. 3.2264e-51	gi|116265954|gb|ABJ91225.1| CBL-interacting protein kinase 18 [Populus trichocarpa] 2.5e-68	gi|566194271|ref|XM_006377486.1| Populus trichocarpa hypothetical protein (POPTR_0011s07230g) mRNA, complete cds 0.0	pfam00069, Pkinase, Protein kinase domain. 1.49116e-31	sp|Q9SN43|CIPKC_ARATH CBL-interacting serine/threonine-protein kinase 12 OS=Arabidopsis thaliana GN=CIPK12 PE=1 SV=1 3.62247e-85	tr|A0MNK5|A0MNK5_POPTR CBL-interacting protein kinase 18 OS=Populus trichocarpa GN=CIPK18 PE=2 SV=1 1.0e-68	GO:0004674, protein serine/threonine kinase activity;GO:0005524, ATP binding;GO:0007165, signal transduction;GO:0016021, integral component of membrane	-
TRINITY_DN57042_c1_g1	147.029	54.9416	1.42013	7.02e-05	0.00350343	up	-	-	gi|566256739|ref|XP_006388291.1| hypothetical protein POPTR_0242s00210g [Populus trichocarpa] 2.4e-18	gi|118486530|gb|EF147069.1| Populus trichocarpa clone WS01227_B01 1.11641e-117	-	-	tr|B9NC89|B9NC89_POPTR Predicted protein OS=Populus trichocarpa GN=POPTRDRAFT_789057 PE=4 SV=1 1.0e-18	-	-
TRINITY_DN46239_c0_g2	5.70618	42.6813	-2.90301	1.1e-09	3.82e-07	down	PLN03210, PLN03210, Resistant to P. syringae 6; Provisional. 2.16915e-18	-	gi|566225674|ref|XP_006371047.1| hypothetical protein POPTR_0019s02950g [Populus trichocarpa] 6.8e-111	gi|566225673|ref|XM_006370985.1| Populus trichocarpa hypothetical protein (POPTR_0019s02950g) mRNA, complete cds 0.0	pfam00931, NB-ARC, NB-ARC domain. 1.83755e-06	sp|Q40392|TMVRN_NICGU TMV resistance protein N OS=Nicotiana glutinosa GN=N PE=1 SV=1 4.67713e-30	tr|Q2XPG3|Q2XPG3_POPTR TIR-NBS disease resistance-like protein OS=Populus trichocarpa PE=2 SV=1 4.7e-98	GO:0005524, ATP binding;GO:0005737, cytoplasm;GO:0007165, signal transduction;GO:0009626, plant-type hypersensitive response;GO:0043531, ADP binding	-
TRINITY_DN54845_c0_g2	4.19365	18.8522	-2.16846	0.000930465	0.0231465	down	PLN00106, PLN00106, malate dehydrogenase. 2.52674e-12	-	gi|743820294|ref|XP_011021105.1| PREDICTED: malate dehydrogenase, chloroplastic-like isoform X1 [Populus euphratica] 3.0e-59	gi|743820299|ref|XM_011022805.1| PREDICTED: Populus euphratica malate dehydrogenase, chloroplastic-like (LOC105123285), transcript variant X3, mRNA 0.0	-	sp|Q9SN86|MDHP_ARATH Malate dehydrogenase, chloroplastic OS=Arabidopsis thaliana GN=At3g47520 PE=1 SV=1 6.28709e-21	tr|B9N6Q8|B9N6Q8_POPTR Predicted protein OS=Populus trichocarpa GN=POPTRDRAFT_785828 PE=3 SV=1 9.1e-58	GO:0005739, mitochondrion;GO:0005774, vacuolar membrane;GO:0005975, carbohydrate metabolic process;GO:0006099, tricarboxylic acid cycle;GO:0006108, malate metabolic process;GO:0008746, NAD(P)+ transhydrogenase activity;GO:0009409, response to cold;GO:0009507, chloroplast;GO:0009532, plastid stroma;GO:0009536, plastid;GO:0009570, chloroplast stroma;GO:0009735, response to cytokinin;GO:0009793, emb…	-
TRINITY_DN47560_c0_g3	80.0541	13.3945	2.57934	1.53e-10	6.84e-08	up	PLN02687, PLN02687, flavonoid 3'-monooxygenase. 1.31227e-98	KOG0156, KOG0156, KOG0156, Cytochrome P450 CYP2 subfamily [Secondary metabolites biosynthesis, transport and catabolism]. 9.84395e-74	gi|566165951|ref|XP_002305292.2| hypothetical protein POPTR_0004s10630g [Populus trichocarpa] 7.9e-290	gi|566165950|ref|XM_002305256.2| Populus trichocarpa hypothetical protein (POPTR_0004s10630g) mRNA, complete cds 0.0	pfam00067, p450, Cytochrome P450. Cytochrome P450s are haem-thiolate proteins involved in the oxidative degradation of various compounds. They are particularly well known for their role in the degradation of environmental toxins and mutagens. They can be divided into 4 classes, according to the method by which electrons from NAD(P)H are delivered to the catalytic site. Sequence conservation is re…	sp|Q9LSF8|C82G1_ARATH Cytochrome P450 82G1 OS=Arabidopsis thaliana GN=CYP82G1 PE=1 SV=1 2.64359e-178	tr|B9H3T3|B9H3T3_POPTR Cytochrome P450 OS=Populus trichocarpa GN=CYP82L1 PE=3 SV=1 7.4e-290	GO:0005506, iron ion binding;GO:0006952, defense response;GO:0016020, membrane;GO:0016021, integral component of membrane;GO:0016114, terpenoid biosynthetic process;GO:0016709, oxidoreductase activity, acting on paired donors, with incorporation or reduction of molecular oxygen, NAD(P)H as one donor, and incorporation of one atom of oxygen;GO:0020037, heme binding;GO:0044550, secondary metabolite…	K17961-ko00904 Diterpenoid biosynthesis
TRINITY_DN43672_c0_g2	8.2202	2.86571	1.52028	0.000408429	0.013049	up	-	-	gi|224134741|ref|XP_002321895.1| hypothetical protein POPTR_0015s13490g [Populus trichocarpa] 9.5e-41	gi|566207420|ref|XM_002321859.2| Populus trichocarpa hypothetical protein (POPTR_0015s13490g) mRNA, complete cds 0.0	-	-	tr|B9ID47|B9ID47_POPTR Predicted protein OS=Populus trichocarpa GN=POPTRDRAFT_666995 PE=4 SV=1 4.0e-41	-	-
TRINITY_DN47224_c2_g4	0.215079	12.5383	-5.86533	0.000434148	0.0136467	down	-	-	gi|939609421|gb|KPV71458.1| hypothetical protein RHOBADRAFT_19411 [Rhodotorula graminis WP1] 1.5e-14	gi|953821272|gb|KT310070.1| Malassezia globosa isolate 1242 large subunit ribosomal RNA gene, partial sequence 1.85819e-150	-	sp|Q8TGM6|TAR1_YEAST Protein TAR1 OS=Saccharomyces cerevisiae (strain ATCC 204508 / S288c) GN=TAR1 PE=2 SV=1 4.80858e-12	tr|M2QWX2|M2QWX2_CERSU Uncharacterized protein (Fragment) OS=Ceriporiopsis subvermispora B GN=CERSUDRAFT_61185 PE=4 SV=1 1.3e-12	GO:0005739, mitochondrion;GO:0043457, regulation of cellular respiration	-
TRINITY_DN58059_c1_g2	31.4965	117.243	-1.89624	5.02e-05	0.00270355	down	PRK08654, PRK08654, pyruvate carboxylase subunit A; Validated. 1.50819e-72	KOG0368, KOG0368, KOG0368, Acetyl-CoA carboxylase [Lipid transport and metabolism]. 0.0	gi|573943742|ref|XP_006654231.1| PREDICTED: acetyl-CoA carboxylase 2 [Oryza brachyantha] 0.0e+00	gi|566157089|ref|XM_006386332.1| Populus trichocarpa hypothetical protein (POPTR_0002s09330g) mRNA, complete cds 0.0	pfam08326, ACC_central, Acetyl-CoA carboxylase, central region. The region featured in this family is found in various eukaryotic acetyl-CoA carboxylases, N-terminal to the catalytic domain (pfam01039). This enzyme (EC:6.4.1.2) is involved in the synthesis of long-chain fatty acids, as it catalyzes the rate-limiting step in this process. 3.15577e-61	sp|Q8S6N5|ACC1_ORYSJ Acetyl-CoA carboxylase 1 OS=Oryza sativa subsp. japonica GN=ACC1 PE=3 SV=1 0.0	tr|J3M5P3|J3M5P3_ORYBR Uncharacterized protein OS=Oryza brachyantha GN=OB05G19170 PE=4 SV=1 0.0e+00	GO:0003989, acetyl-CoA carboxylase activity;GO:0004075, biotin carboxylase activity;GO:0005524, ATP binding;GO:0005829, cytosol;GO:0006633, fatty acid biosynthetic process;GO:0046872, metal ion binding;GO:2001295, malonyl-CoA biosynthetic process	K11262-ko04152 AMPK signaling pathway;ko01212 Fatty acid metabolism;ko00061 Fatty acid biosynthesis;ko00620 Pyruvate metabolism;ko00640 Propanoate metabolism;ko00254 Aflatoxin biosynthesis
TRINITY_DN58059_c1_g1	19.1124	66.9137	-1.80779	0.000213306	0.0081174	down	-	KOG0368, KOG0368, KOG0368, Acetyl-CoA carboxylase [Lipid transport and metabolism]. 3.97507e-09	gi|566157090|ref|XP_006386394.1| hypothetical protein POPTR_0002s09330g [Populus trichocarpa] 8.3e-96	gi|566157091|ref|XM_002302241.2| Populus trichocarpa acetyl-CoA carboxylase family protein (POPTR_0002s09330g) mRNA, complete cds 0.0	-	sp|Q38970|ACC1_ARATH Acetyl-CoA carboxylase 1 OS=Arabidopsis thaliana GN=ACC1 PE=1 SV=1 1.56688e-86	tr|B9GUK0|B9GUK0_POPTR Predicted protein OS=Populus trichocarpa GN=POPTRDRAFT_830215 PE=4 SV=1 3.5e-96	GO:0003989, acetyl-CoA carboxylase activity;GO:0004075, biotin carboxylase activity;GO:0005524, ATP binding;GO:0005829, cytosol;GO:0005886, plasma membrane;GO:0006633, fatty acid biosynthetic process;GO:0009735, response to cytokinin;GO:0009793, embryo development ending in seed dormancy;GO:0009933, meristem structural organization;GO:0010072, primary shoot apical meristem specification;GO:003049…	-
TRINITY_DN42255_c0_g1	5.39005	0.979829	2.4597	0.00155937	0.0329191	up	-	-	-	gi|157410315|gb|AC210554.1| Populus trichocarpa clone POP103-K18, complete sequence 2.0664e-59	-	-	-	-	-
TRINITY_DN56101_c0_g1	29.3688	13.5954	1.11117	0.00125325	0.0286613	up	pfam16596, MFMR_assoc, Disordered region downstream of MFMR. This is a conserved region of disorder, identified with the MobiDB database, found in plants immediately to the C-terminus of the MFMR domain.ED P42775.1/115-264; P42775.1/115-264;. 2.34389e-21	-	gi|566203322|ref|XP_002320177.2| hypothetical protein POPTR_0014s08990g [Populus trichocarpa] 3.0e-125	gi|743789922|ref|XM_011039270.1| PREDICTED: Populus euphratica common plant regulatory factor 1-like (LOC105134726), transcript variant X4, mRNA 0.0	pfam16596, MFMR_assoc, Disordered region downstream of MFMR. This is a conserved region of disorder, identified with the MobiDB database, found in plants immediately to the C-terminus of the MFMR domain.ED P42775.1/115-264; P42775.1/115-264;. 5.59976e-22	sp|Q99089|CPRF1_PETCR Common plant regulatory factor 1 OS=Petroselinum crispum GN=CPRF1 PE=2 SV=1 4.08124e-59	tr|B9I8T8|B9I8T8_POPTR Predicted protein (Fragment) OS=Populus trichocarpa GN=POPTRDRAFT_244814 PE=4 SV=1 1.3e-125	GO:0003700, transcription factor activity, sequence-specific DNA binding;GO:0005634, nucleus;GO:0006351, transcription, DNA-templated;GO:0043565, sequence-specific DNA binding	-
TRINITY_DN49257_c0_g1	13.336	34.5627	-1.37389	0.00139114	0.0307894	down	TIGR00728, Putative_oligopeptide_transporter_YGL114W, oligopeptide transporter, OPT superfamily. This superfamily has two main branches. One branch contains a tetrapeptide transporter demonstrated experimentally in three different species of yeast. The other family contains EspB of Myxococcus xanthus, a protein required for normal rather than delayed sporulation after cellular aggregation; its ro…	KOG2262, KOG2262, KOG2262, Sexual differentiation process protein ISP4 [Signal transduction mechanisms]. 0.0	gi|566162643|ref|XP_002303684.2| hypothetical protein POPTR_0003s14540g [Populus trichocarpa] 7.2e-287	gi|743825109|ref|XM_011024127.1| PREDICTED: Populus euphratica oligopeptide transporter 7-like (LOC105124211), mRNA 0.0	pfam03169, OPT, OPT oligopeptide transporter protein. The OPT family of oligopeptide transporters is distinct from the ABC pfam00005 and PTR pfam00854 transporter families. OPT transporters were first recognized in fungi (Candida albicans and Schizosaccharomyces pombe), but this alignment also includes orthologues from Arabidopsis thaliana. OPT transporters are thought to have 12-14 transmembrane…	sp|O82485|OPT7_ARATH Oligopeptide transporter 7 OS=Arabidopsis thaliana GN=OPT7 PE=2 SV=1 0.0	tr|B9GXV8|B9GXV8_POPTR Oligopeptide transporter OPT family OS=Populus trichocarpa GN=POPTRDRAFT_817437 PE=4 SV=1 7.0e-276	GO:0015031, protein transport;GO:0015833, peptide transport;GO:0016020, membrane;GO:0016021, integral component of membrane;GO:0055085, transmembrane transport	-
TRINITY_DN38299_c0_g1	146.968	42.6869	1.78364	5.57e-08	1.08e-05	up	-	-	gi|566184320|ref|XP_006379877.1| hypothetical protein POPTR_0008s16470g [Populus trichocarpa] 1.2e-33	gi|566184319|ref|XM_006379815.1| Populus trichocarpa hypothetical protein (POPTR_0008s16470g) mRNA, complete cds 0.0	-	sp|Q6NN02|Y4445_ARATH Uncharacterized protein At4g14450, chloroplastic OS=Arabidopsis thaliana GN=At4g14450 PE=2 SV=1 2.43696e-10	tr|A9P9X0|A9P9X0_POPTR Putative uncharacterized protein OS=Populus trichocarpa PE=4 SV=1 4.9e-34	GO:0009507, chloroplast	-
TRINITY_DN55741_c0_g2	2.36033	15.5006	-2.71527	1.76e-09	5.67e-07	down	PLN02333, PLN02333, glucose-6-phosphate 1-dehydrogenase. 1.09799e-83	KOG0563, KOG0563, KOG0563, Glucose-6-phosphate 1-dehydrogenase [Carbohydrate transport and metabolism]. 4.41535e-28	gi|224053521|ref|XP_002297854.1| glucose-6-phosphate dehydrogenase family protein [Populus trichocarpa] 2.0e-63	gi|743880101|ref|XM_011037813.1| PREDICTED: Populus euphratica glucose-6-phosphate 1-dehydrogenase, chloroplastic-like (LOC105133723), mRNA 0.0	pfam00479, G6PD_N, Glucose-6-phosphate dehydrogenase, NAD binding domain. 4.03442e-11	sp|Q43793|G6PDC_TOBAC Glucose-6-phosphate 1-dehydrogenase, chloroplastic OS=Nicotiana tabacum PE=2 SV=1 7.06026e-68	tr|B9GMN8|B9GMN8_POPTR Glucose-6-phosphate 1-dehydrogenase OS=Populus trichocarpa GN=POPTRDRAFT_708767 PE=3 SV=1 8.3e-64	GO:0004345, glucose-6-phosphate dehydrogenase activity;GO:0006006, glucose metabolic process;GO:0006098, pentose-phosphate shunt;GO:0009507, chloroplast;GO:0050661, NADP binding	-
TRINITY_DN55741_c0_g1	5.50587	41.3338	-2.90828	5.39e-13	4.91e-10	down	PLN02333, PLN02333, glucose-6-phosphate 1-dehydrogenase. 0.0	KOG0563, KOG0563, KOG0563, Glucose-6-phosphate 1-dehydrogenase [Carbohydrate transport and metabolism]. 1.26376e-141	gi|224053521|ref|XP_002297854.1| glucose-6-phosphate dehydrogenase family protein [Populus trichocarpa] 1.8e-181	gi|566148766|ref|XM_002297818.2| Populus trichocarpa glucose-6-phosphate dehydrogenase family protein (POPTR_0001s13510g) mRNA, complete cds 0.0	pfam02781, G6PD_C, Glucose-6-phosphate dehydrogenase, C-terminal domain. 1.32824e-79	sp|Q9FY99|G6PD2_ARATH Glucose-6-phosphate 1-dehydrogenase 2, chloroplastic OS=Arabidopsis thaliana GN=At5g13110 PE=1 SV=2 0.0	tr|B9GMN8|B9GMN8_POPTR Glucose-6-phosphate 1-dehydrogenase OS=Populus trichocarpa GN=POPTRDRAFT_708767 PE=3 SV=1 7.6e-182	GO:0004345, glucose-6-phosphate dehydrogenase activity;GO:0006006, glucose metabolic process;GO:0006098, pentose-phosphate shunt;GO:0009051, pentose-phosphate shunt, oxidative branch;GO:0009507, chloroplast;GO:0009570, chloroplast stroma;GO:0050661, NADP binding	K00036-ko01200 Carbon metabolism;ko00480 Glutathione metabolism;ko00030 Pentose phosphate pathway
TRINITY_DN54135_c0_g2	42.8028	21.1465	1.01729	0.000630557	0.0176787	up	pfam03619, Solute_trans_a, Organic solute transporter Ostalpha. This family is a transmembrane organic solute transport protein. In vertebrates these proteins form a complex with Ostbeta, and function as bile transporters. In plants they may transport brassinosteroid-like compounds and act as regulators of cell death. 1.66574e-31	KOG2641, KOG2641, KOG2641, Predicted seven transmembrane receptor - rhodopsin family [Signal transduction mechanisms]. 5.49437e-34	gi|224078880|ref|XP_002305664.1| hypothetical protein POPTR_0004s03600g [Populus trichocarpa] 1.5e-114	gi|566164742|ref|XM_002305628.2| Populus trichocarpa hypothetical protein (POPTR_0004s03600g) mRNA, complete cds 0.0	pfam03619, Solute_trans_a, Organic solute transporter Ostalpha. This family is a transmembrane organic solute transport protein. In vertebrates these proteins form a complex with Ostbeta, and function as bile transporters. In plants they may transport brassinosteroid-like compounds and act as regulators of cell death. 3.97959e-32	sp|A2VDL9|T184B_BOVIN Transmembrane protein 184B OS=Bos taurus GN=TMEM184B PE=2 SV=1 8.77738e-22	tr|B9H234|B9H234_POPTR Predicted protein OS=Populus trichocarpa GN=POPTRDRAFT_831071 PE=4 SV=1 6.1e-115	GO:0005215, transporter activity;GO:0006810, transport;GO:0016021, integral component of membrane	-
TRINITY_DN51354_c1_g4	1.60651	7.03885	-2.13141	0.00135613	0.030302	down	-	-	gi|743828449|ref|XP_011023278.1| PREDICTED: pinin-like isoform X2 [Populus euphratica] 2.5e-12	gi|566158371|ref|XM_006386548.1| Populus trichocarpa hypothetical protein (POPTR_0002s16500g) mRNA, complete cds 0.0	-	-	tr|B9GQD1|B9GQD1_POPTR Predicted protein OS=Populus trichocarpa GN=POPTRDRAFT_710061 PE=4 SV=1 1.1e-12	GO:0030001, metal ion transport;GO:0046872, metal ion binding	-
TRINITY_DN51354_c1_g1	14.3466	37.7817	-1.39698	0.00148262	0.03209	down	-	KOG1603, KOG1603, KOG1603, Copper chaperone [Inorganic ion transport and metabolism]. 1.31321e-07	gi|224089579|ref|XP_002308765.1| hypothetical protein POPTR_0006s00790g [Populus trichocarpa] 7.7e-22	gi|566173791|ref|XM_002308729.2| Populus trichocarpa hypothetical protein (POPTR_0006s00790g) mRNA, complete cds 0.0	-	-	tr|B9HCD5|B9HCD5_POPTR Predicted protein OS=Populus trichocarpa GN=POPTRDRAFT_1080124 PE=4 SV=1 3.2e-22	GO:0005737, cytoplasm;GO:0030001, metal ion transport;GO:0046914, transition metal ion binding;GO:0046916, cellular transition metal ion homeostasis	-
TRINITY_DN50807_c0_g1	21.1164	10.5251	1.00453	7.11e-06	0.000585306	up	-	-	gi|743784379|ref|XP_011022249.1| PREDICTED: uncharacterized protein LOC105124081 [Populus euphratica] 9.8e-129	gi|743784378|ref|XM_011023947.1| PREDICTED: Populus euphratica uncharacterized LOC105124081 (LOC105124081), mRNA 0.0	-	-	tr|B9HWG9|B9HWG9_POPTR Predicted protein OS=Populus trichocarpa GN=POPTRDRAFT_769638 PE=4 SV=1 1.2e-101	GO:0016021, integral component of membrane	-
TRINITY_DN43688_c0_g1	2.63394	12.7324	-2.2732	0.000355969	0.0117773	down	-	-	gi|566149384|ref|XP_006369099.1| auxin-responsive family protein [Populus trichocarpa] 6.5e-65	gi|743910193|ref|XM_011050299.1| PREDICTED: Populus euphratica uncharacterized LOC105142596 (LOC105142596), mRNA 0.0	-	-	tr|B9N7H0|B9N7H0_POPTR SAUR family protein OS=Populus trichocarpa GN=SAUR7 PE=4 SV=1 2.7e-65	GO:0009733, response to auxin	-
TRINITY_DN55256_c0_g1	9.38373	3.05904	1.61708	0.00231886	0.0424616	up	-	-	gi|566211698|ref|XP_006372901.1| hypothetical protein POPTR_0017s06140g [Populus trichocarpa] 1.7e-21	gi|566211697|ref|XM_006372839.1| Populus trichocarpa hypothetical protein (POPTR_0017s06140g) mRNA, complete cds 0.0	-	-	tr|B9MY09|B9MY09_POPTR Predicted protein OS=Populus trichocarpa GN=POPTRDRAFT_920990 PE=4 SV=1 8.7e-07	-	-
TRINITY_DN55163_c2_g5	55.2139	19.421	1.50741	1.23e-05	0.00090392	up	-	-	gi|743820937|ref|XP_011021285.1| PREDICTED: uncharacterized protein LOC105123405 isoform X1 [Populus euphratica] 1.3e-09	gi|146149430|gb|AC203075.1| Populus trichocarpa clone Pop1-112P9, complete sequence 2.17347e-18	-	-	-	-	-
TRINITY_DN57932_c1_g2	42.7243	1.2919	5.04749	0.000910081	0.022785	up	-	-	gi|566173793|ref|XP_002307857.2| VQ motif-containing family protein [Populus trichocarpa] 2.4e-27	gi|566173792|ref|XM_002307821.2| Populus trichocarpa VQ motif-containing family protein (POPTR_0006s00810g) mRNA, complete cds 0.0	-	-	tr|B9HCD7|B9HCD7_POPTR Predicted protein OS=Populus trichocarpa GN=POPTRDRAFT_560114 PE=4 SV=1 4.9e-27	-	-
TRINITY_DN57248_c0_g1	35.4718	118.599	-1.74135	0.00121003	0.0278966	down	PLN02779, PLN02779, haloacid dehalogenase-like hydrolase family protein. 8.67098e-58	KOG2914, KOG2914, KOG2914, Predicted haloacid-halidohydrolase and related hydrolases [General function prediction only]. 1.20592e-06	gi|566179697|ref|XP_002309972.2| hypothetical protein POPTR_0007s05210g [Populus trichocarpa] 2.8e-117	gi|566179694|ref|XM_006380346.1| Populus trichocarpa hypothetical protein (POPTR_0007s05210g) mRNA, complete cds 0.0	-	sp|Q680K2|GPPL1_ARATH Haloacid dehalogenase-like hydrolase domain-containing protein At4g39970 OS=Arabidopsis thaliana GN=At4g39970 PE=2 SV=1 1.30745e-108	tr|B9HFE8|B9HFE8_POPTR Predicted protein (Fragment) OS=Populus trichocarpa GN=POPTRDRAFT_217444 PE=4 SV=1 3.1e-94	GO:0008152, metabolic process;GO:0009507, chloroplast;GO:0009570, chloroplast stroma;GO:0009941, chloroplast envelope;GO:0016787, hydrolase activity;GO:0046872, metal ion binding	-
TRINITY_DN56642_c0_g1	4.82863	13.4624	-1.47924	0.00115432	0.0268289	down	pfam03385, DUF288, Protein of unknown function, DUF288. 3.25508e-08	-	gi|224087016|ref|XP_002308029.1| hypothetical protein POPTR_0006s04950g [Populus trichocarpa] 0.0e+00	gi|566174530|ref|XM_002307993.2| Populus trichocarpa hypothetical protein (POPTR_0006s04950g) mRNA, complete cds 0.0	pfam03385, DUF288, Protein of unknown function, DUF288. 7.77667e-09	-	tr|B9H9U6|B9H9U6_POPTR Predicted protein OS=Populus trichocarpa GN=POPTRDRAFT_819058 PE=4 SV=1 0.0e+00	GO:0016021, integral component of membrane	-
TRINITY_DN56292_c1_g2	47.3062	22.4365	1.07618	0.000556872	0.0162958	up	-	-	-	gi|743910510|ref|XM_011050468.1| PREDICTED: Populus euphratica protein TRANSPARENT TESTA 12-like (LOC105142704), mRNA 4.71487e-107	-	-	-	-	-
TRINITY_DN57257_c0_g3	6.10356	19.0256	-1.64022	0.00148823	0.0321481	down	-	-	gi|566163651|ref|XP_002303916.2| hypothetical protein POPTR_0003s19960g [Populus trichocarpa] 1.5e-58	gi|566163650|ref|XM_002303880.2| Populus trichocarpa hypothetical protein (POPTR_0003s19960g) mRNA, complete cds 0.0	-	sp|F4JCX9|LNK2_ARATH Protein LNK2 OS=Arabidopsis thaliana GN=LNK2 PE=1 SV=1 9.56254e-19	tr|B9GWM0|B9GWM0_POPTR Predicted protein (Fragment) OS=Populus trichocarpa GN=POPTRDRAFT_647277 PE=4 SV=1 6.5e-59	GO:0005634, nucleus;GO:0006351, transcription, DNA-templated;GO:0006355, regulation of transcription, DNA-templated;GO:0016021, integral component of membrane;GO:0048511, rhythmic process	-
TRINITY_DN46016_c0_g2	9.16406	79.5322	-3.11748	3.9e-11	2.17e-08	down	pfam16974, NAR2, High-affinity nitrate transporter accessory. NAR2 is a family of plant proteins with a C-terminal transmembrane region that is an essential accessory for high-affinity nitrate uptake. This family works together with NRT2, a 12xTM family of proteins that is part of family MFS_1, pfam07690. NAR2 is also involved in the repression of lateral root initiation in response to high ratio…	-	gi|566206809|ref|XP_006374542.1| hypothetical protein POPTR_0015s09670g [Populus trichocarpa] 2.7e-89	gi|566206808|ref|XM_006374480.1| Populus trichocarpa hypothetical protein (POPTR_0015s09670g) mRNA, complete cds 0.0	pfam16974, NAR2, High-affinity nitrate transporter accessory. NAR2 is a family of plant proteins with a C-terminal transmembrane region that is an essential accessory for high-affinity nitrate uptake. This family works together with NRT2, a 12xTM family of proteins that is part of family MFS_1, pfam07690. NAR2 is also involved in the repression of lateral root initiation in response to high ratio…	sp|Q9FGS5|NRT31_ARATH High-affinity nitrate transporter 3.1 OS=Arabidopsis thaliana GN=NRT3.1 PE=1 SV=1 8.21778e-56	tr|B9P5X4|B9P5X4_POPTR Predicted protein OS=Populus trichocarpa GN=POPTRDRAFT_748317 PE=4 SV=1 1.1e-89	GO:0005886, plasma membrane;GO:0009611, response to wounding;GO:0010167, response to nitrate;GO:0015112, nitrate transmembrane transporter activity;GO:0015706, nitrate transport;GO:0016021, integral component of membrane;GO:0042128, nitrate assimilation	-
TRINITY_DN57860_c1_g1	30.6016	139.685	-2.19049	2.09e-06	0.000217885	down	PLN02436, PLN02436, cellulose synthase A. 0.0	-	gi|224096486|ref|XP_002310628.1| cellulose synthase family protein [Populus trichocarpa] 1.6e-268	gi|566170288|ref|XM_002307109.2| Populus trichocarpa cellulose synthase family protein (POPTR_0005s08970g) mRNA, complete cds 0.0	pfam03552, Cellulose_synt, Cellulose synthase. Cellulose, an aggregate of unbranched polymers of beta-1,4-linked glucose residues, is the major component of wood and thus paper, and is synthesized by plants, most algae, some bacteria and fungi, and even some animals. The genes that synthesize cellulose in higher plants differ greatly from the well-characterized genes found in Acetobacter and Agro…	sp|Q94JQ6|CESA6_ARATH Cellulose synthase A catalytic subunit 6 [UDP-forming] OS=Arabidopsis thaliana GN=CESA6 PE=1 SV=2 0.0	tr|B9HGC9|B9HGC9_POPTR Predicted protein OS=Populus trichocarpa GN=POPTRDRAFT_819877 PE=2 SV=1 6.6e-269	GO:0005794, Golgi apparatus;GO:0005886, plasma membrane;GO:0008270, zinc ion binding;GO:0009833, plant-type primary cell wall biogenesis;GO:0010330, cellulose synthase complex;GO:0016020, membrane;GO:0016021, integral component of membrane;GO:0016049, cell growth;GO:0016760, cellulose synthase (UDP-forming) activity;GO:0030244, cellulose biosynthetic process;GO:0043622, cortical microtubule organ…	-
TRINITY_DN46042_c1_g2	0.0001	5.26435	-15.684	0.00146822	0.0319072	down	-	-	gi|167860595|gb|ACA05077.1| hypothetical protein [Flammeovirga yaeyamensis] 8.5e-12	gi|300862688|emb|FR667550.1| Uncultured bacterium partial 16S rRNA gene, clone GBe_077 3.92668e-122	-	-	tr|B1A1E2|B1A1E2_9BACT Putative uncharacterized protein OS=Flammeovirga yaeyamensis PE=4 SV=1 3.5e-12	-	-
TRINITY_DN49074_c2_g3	6.35862	1.89715	1.74488	0.00278346	0.0483038	up	-	-	gi|566194827|ref|XP_006377731.1| hypothetical protein POPTR_0011s10665g [Populus trichocarpa] 5.8e-37	gi|566194822|ref|XM_006377668.1| Populus trichocarpa Cf-4/9 disease resistance-like family protein (POPTR_0011s10640g) mRNA, complete cds 1.06773e-163	-	-	tr|B9NCA7|B9NCA7_POPTR Predicted protein OS=Populus trichocarpa GN=POPTRDRAFT_589794 PE=4 SV=1 3.2e-37	-	-
TRINITY_DN56372_c0_g3	46.3207	23.0307	1.0081	0.00106652	0.0253383	up	cd14066, STKc_IRAK, Catalytic domain of the Serine/Threonine kinases, Interleukin-1 Receptor Associated Kinases and related STKs. STKs catalyze the transfer of the gamma-phosphoryl group from ATP to serine/threonine residues on protein substrates. IRAKs are involved in Toll-like receptor (TLR) and interleukin-1 (IL-1) signalling pathways, and are thus critical in regulating innate immune response…	KOG1187, KOG1187, KOG1187, Serine/threonine protein kinase [Signal transduction mechanisms]. 1.38904e-58	gi|224091435|ref|XP_002309250.1| hypothetical protein POPTR_0006s22000g [Populus trichocarpa] 0.0e+00	gi|110578677|gb|AC185354.2| Populus trichocarpa clone Pop1-100B1, complete sequence 0.0	pfam07714, Pkinase_Tyr, Protein tyrosine kinase. 7.71746e-19	sp|Q9SIT1|TMK3_ARATH Receptor-like kinase TMK3 OS=Arabidopsis thaliana GN=TMK3 PE=2 SV=1 1.91301e-100	tr|B9H9A6|B9H9A6_POPTR Predicted protein OS=Populus trichocarpa GN=POPTRDRAFT_762728 PE=3 SV=1 0.0e+00	GO:0004674, protein serine/threonine kinase activity;GO:0005524, ATP binding;GO:0005886, plasma membrane;GO:0009505, plant-type cell wall;GO:0009506, plasmodesma;GO:0009555, pollen development;GO:0016021, integral component of membrane	-
TRINITY_DN48406_c0_g2	22.1254	57.9854	-1.38999	0.0011641	0.0269976	down	smart00380, AP2, DNA-binding domain in plant proteins such as APETALA2 and EREBPs. 5.30632e-19	-	gi|224131080|ref|XP_002320996.1| hypothetical protein POPTR_0014s12090g [Populus trichocarpa] 7.6e-148	gi|743791654|ref|XM_011043613.1| PREDICTED: Populus euphratica ethylene-responsive transcription factor ERF071-like (LOC105137755), mRNA 0.0	-	sp|P42736|RAP23_ARATH Ethylene-responsive transcription factor RAP2-3 OS=Arabidopsis thaliana GN=RAP2-3 PE=1 SV=2 2.92229e-30	tr|B9I9P1|B9I9P1_POPTR AP2/ERF domain-containing transcription factor OS=Populus trichocarpa GN=ERF37 PE=4 SV=1 3.2e-148	GO:0003677, DNA binding;GO:0003700, transcription factor activity, sequence-specific DNA binding;GO:0005634, nucleus;GO:0005737, cytoplasm;GO:0005886, plasma membrane;GO:0006351, transcription, DNA-templated;GO:0008219, cell death;GO:0009723, response to ethylene;GO:0009735, response to cytokinin;GO:0009753, response to jasmonic acid;GO:0009873, ethylene-activated signaling pathway;GO:0010286, he…	-
TRINITY_DN54153_c1_g1	6.11499	2.50605	1.28693	0.000567821	0.0165146	up	-	-	gi|566182965|ref|XP_002311292.2| hypothetical protein POPTR_0008s08380g [Populus trichocarpa] 2.0e-44	gi|566182964|ref|XM_002311256.2| Populus trichocarpa hypothetical protein (POPTR_0008s08380g) mRNA, complete cds 0.0	-	-	tr|B9HI51|B9HI51_POPTR Predicted protein OS=Populus trichocarpa GN=POPTRDRAFT_820472 PE=4 SV=1 8.3e-45	-	-
TRINITY_DN53638_c0_g1	46.771	128.349	-1.45638	3.23e-05	0.00192578	down	-	-	gi|566153478|ref|XP_002298903.2| sodium/calcium exchanger family protein [Populus trichocarpa] 2.2e-137	gi|743912704|ref|XM_011001939.1| PREDICTED: Populus euphratica uncharacterized LOC105107868 (LOC105107868), mRNA 0.0	-	-	tr|B9GGG0|B9GGG0_POPTR Predicted protein OS=Populus trichocarpa GN=POPTRDRAFT_707778 PE=4 SV=1 4.5e-148	GO:0005432, calcium:sodium antiporter activity;GO:0005509, calcium ion binding;GO:0016021, integral component of membrane;GO:0055074, calcium ion homeostasis	-
TRINITY_DN50184_c2_g1	5.10434	24.5447	-2.26561	0.000217109	0.00821237	down	-	-	gi|566160398|ref|XP_006385250.1| hypothetical protein POPTR_0003s02110g [Populus trichocarpa] 1.4e-66	gi|743937387|ref|XM_011014797.1| PREDICTED: Populus euphratica TMV resistance protein N-like (LOC105117218), transcript variant X2, mRNA 1.62388e-163	-	sp|Q40392|TMVRN_NICGU TMV resistance protein N OS=Nicotiana glutinosa GN=N PE=1 SV=1 6.95566e-09	tr|Q2XPG3|Q2XPG3_POPTR TIR-NBS disease resistance-like protein OS=Populus trichocarpa PE=2 SV=1 5.7e-67	GO:0005524, ATP binding;GO:0005737, cytoplasm;GO:0007165, signal transduction;GO:0009626, plant-type hypersensitive response;GO:0043531, ADP binding	-
TRINITY_DN50914_c1_g1	0.812664	8.84348	-3.44388	7.64e-05	0.00373444	down	-	-	gi|566176731|ref|XP_006381728.1| hypothetical protein POPTR_0006s16600g [Populus trichocarpa] 6.4e-16	gi|111154122|gb|AC182668.2| Populus trichocarpa clone Pop1-19F23, complete sequence 0.0	-	-	tr|B9P7A4|B9P7A4_POPTR Predicted protein OS=Populus trichocarpa GN=POPTRDRAFT_793213 PE=4 SV=1 1.3e-15	-	-
TRINITY_DN56482_c0_g4	65.5625	18.0537	1.86058	1.79e-05	0.00121825	up	PLN00140, PLN00140, alcohol acetyltransferase family protein; Provisional. 4.97743e-07	-	gi|743896582|ref|XP_011041557.1| PREDICTED: BAHD acyltransferase At5g47980-like [Populus euphratica] 2.3e-39	gi|743896587|ref|XM_011043258.1| PREDICTED: Populus euphratica BAHD acyltransferase At5g47980-like (LOC105137497), mRNA 6.98785e-114	-	sp|Q9FI40|BAHD1_ARATH BAHD acyltransferase At5g47980 OS=Arabidopsis thaliana GN=BAHD1 PE=2 SV=1 2.27813e-08	tr|B9HTB1|B9HTB1_POPTR Predicted protein OS=Populus trichocarpa GN=POPTRDRAFT_768990 PE=4 SV=1 2.7e-37	GO:0016747, transferase activity, transferring acyl groups other than amino-acyl groups	-
TRINITY_DN56482_c0_g1	18.0482	7.21299	1.32318	4.38e-05	0.00243643	up	PLN00140, PLN00140, alcohol acetyltransferase family protein; Provisional. 4.3284e-67	-	gi|566189447|ref|XP_002314550.2| hypothetical protein POPTR_0010s06640g [Populus trichocarpa] 6.9e-143	gi|566189446|ref|XM_002314514.2| Populus trichocarpa hypothetical protein (POPTR_0010s06640g) mRNA, complete cds 0.0	pfam02458, Transferase, Transferase family. This family includes a number of transferase enzymes. These include anthranilate N-hydroxycinnamoyl/benzoyltransferase that catalyzes the first committed reaction of phytoalexin biosynthesis. Deacetylvindoline 4-O-acetyltransferase EC:2.3.1.107 catalyzes the last step in vindoline biosynthesis is also a member of this family. The motif HXXXD is probably…	sp|Q9FI40|BAHD1_ARATH BAHD acyltransferase At5g47980 OS=Arabidopsis thaliana GN=BAHD1 PE=2 SV=1 3.06526e-59	tr|B9HTB1|B9HTB1_POPTR Predicted protein OS=Populus trichocarpa GN=POPTRDRAFT_768990 PE=4 SV=1 2.9e-143	GO:0016747, transferase activity, transferring acyl groups other than amino-acyl groups	-
TRINITY_DN44610_c1_g1	19.9569	5.75995	1.79276	4.65e-06	0.000417	up	cd00018, AP2, DNA-binding domain found in transcription regulators in plants such as APETALA2 and EREBP (ethylene responsive element binding protein). In EREBPs the domain specifically binds to the 11bp GCC box of the ethylene response element (ERE), a promotor element essential for ethylene responsiveness. EREBPs and the C-repeat binding factor CBF1, which is involved in stress response, contain…	-	gi|743841988|ref|XP_011026594.1| PREDICTED: ethylene-responsive transcription factor ERF016-like [Populus euphratica] 2.9e-20	gi|743943932|ref|XM_011018178.1| PREDICTED: Populus euphratica ethylene-responsive transcription factor ERF016-like (LOC105119982), mRNA 0.0	-	sp|Q8W3M3|RAP29_ARATH Ethylene-responsive transcription factor RAP2-9 OS=Arabidopsis thaliana GN=RAP2-9 PE=2 SV=1 7.30975e-20	tr|A9PLA5|A9PLA5_POPTR AP2/ERF domain-containing transcription factor OS=Populus trichocarpa GN=RAP2L15 PE=4 SV=1 1.2e-20	GO:0003677, DNA binding;GO:0003700, transcription factor activity, sequence-specific DNA binding;GO:0005634, nucleus;GO:0006351, transcription, DNA-templated;GO:0009873, ethylene-activated signaling pathway	-
TRINITY_DN49445_c1_g1	2.26639	15.314	-2.75639	5.13e-05	0.00274392	down	pfam05553, DUF761, Cotton fibre expressed protein. This family consists of several plant proteins of unknown function. Three of the sequences (from Gossypium hirsutum) in this family are described as cotton fibre expressed proteins. The remaining sequences, found in Arabidopsis thaliana, are uncharacterized. 3.56191e-06	-	gi|224131030|ref|XP_002320984.1| hypothetical protein POPTR_0014s11850g [Populus trichocarpa] 1.0e-93	gi|566203851|ref|XM_002320948.2| Populus trichocarpa hypothetical protein (POPTR_0014s11850g) mRNA, complete cds 0.0	pfam05553, DUF761, Cotton fibre expressed protein. This family consists of several plant proteins of unknown function. Three of the sequences (from Gossypium hirsutum) in this family are described as cotton fibre expressed proteins. The remaining sequences, found in Arabidopsis thaliana, are uncharacterized. 8.50969e-07	-	tr|B9I9L7|B9I9L7_POPTR Predicted protein OS=Populus trichocarpa GN=POPTRDRAFT_834861 PE=4 SV=1 4.2e-94	-	-
TRINITY_DN57567_c0_g2	2.43524	7.67628	-1.65634	0.000506605	0.0152309	down	PLN03195, PLN03195, fatty acid omega-hydroxylase; Provisional. 5.61882e-108	KOG0157, KOG0157, KOG0157, Cytochrome P450 CYP4/CYP19/CYP26 subfamilies [Secondary metabolites biosynthesis, transport and catabolism, Lipid transport and metabolism]. 2.09736e-55	gi|566150972|ref|XP_002299820.2| Cytochrome P450 86A1 family protein [Populus trichocarpa] 6.3e-290	gi|566150971|ref|XM_002299784.2| Populus trichocarpa Cytochrome P450 86A1 family protein (POPTR_0001s25680g) mRNA, complete cds 0.0	pfam00067, p450, Cytochrome P450. Cytochrome P450s are haem-thiolate proteins involved in the oxidative degradation of various compounds. They are particularly well known for their role in the degradation of environmental toxins and mutagens. They can be divided into 4 classes, according to the method by which electrons from NAD(P)H are delivered to the catalytic site. Sequence conservation is re…	sp|P48422|C86A1_ARATH Cytochrome P450 86A1 OS=Arabidopsis thaliana GN=CYP86A1 PE=1 SV=2 0.0	tr|B9GIU0|B9GIU0_POPTR Predicted protein OS=Populus trichocarpa GN=POPTRDRAFT_797642 PE=3 SV=1 9.1e-291	GO:0004497, monooxygenase activity;GO:0005506, iron ion binding;GO:0005773, vacuole;GO:0006631, fatty acid metabolic process;GO:0010345, suberin biosynthetic process;GO:0016021, integral component of membrane;GO:0016705, oxidoreductase activity, acting on paired donors, with incorporation or reduction of molecular oxygen;GO:0018685, alkane 1-monooxygenase activity;GO:0020037, heme binding	K15401-ko00073 Cutin, suberine and wax biosynthesis
TRINITY_DN58025_c3_g2	53.1914	158.322	-1.57359	0.00131738	0.0296422	down	smart00554, FAS1, Four repeated domains in the Fasciclin I family of proteins, present in many other contexts. 3.08526e-07	KOG1437, KOG1437, KOG1437, Fasciclin and related adhesion glycoproteins [Cell wall/membrane/envelope biogenesis, Extracellular structures]. 3.30702e-49	gi|224091467|ref|XP_002309262.1| hypothetical protein POPTR_0006s21460g [Populus trichocarpa] 5.1e-224	gi|743907437|ref|XM_011048841.1| PREDICTED: Populus euphratica fasciclin-like arabinogalactan protein 15 (LOC105141582), mRNA 0.0	pfam02469, Fasciclin, Fasciclin domain. This extracellular domain is found repeated four times in grasshopper fasciclin I as well as in proteins from mammals, sea urchins, plants, yeast and bacteria. 7.30427e-06	sp|Q66GR0|FLA17_ARATH Fasciclin-like arabinogalactan protein 17 OS=Arabidopsis thaliana GN=FLA17 PE=2 SV=1 0.0	tr|B9H9M6|B9H9M6_POPTR Predicted protein OS=Populus trichocarpa GN=POPTRDRAFT_653408 PE=4 SV=1 2.1e-224	GO:0005576, extracellular region;GO:0005773, vacuole	-
TRINITY_DN42329_c0_g1	1.41682	15.9881	-3.49627	2.41e-12	1.98e-09	down	-	-	-	gi|566203331|ref|XM_002320810.2| Populus trichocarpa arabinogalactan-protein (POPTR_0014s09050g) mRNA, complete cds 0.0	-	-	-	-	-
TRINITY_DN53591_c0_g4	1.64403	8.72512	-2.40794	0.00222282	0.041232	down	cd06098, phytepsin, Phytepsin, a plant homolog of mammalian lysosomal pepsins. Phytepsin, a plant homolog of mammalian lysosomal pepsins, resides in grains, roots, stems, leaves and flowers. Phytepsin may participate in metabolic turnover and in protein processing events. In addition, it highly expressed in several plant tissues undergoing apoptosis. Phytepsin contains an internal region consisti…	-	gi|566198643|ref|XP_002319454.2| aspartic proteinase 2 [Populus trichocarpa] 6.4e-26	gi|566198642|ref|XM_002319418.2| Populus trichocarpa aspartic proteinase 2 (POPTR_0013s00380g) mRNA, complete cds 0.0	pfam00026, Asp, Eukaryotic aspartyl protease. Aspartyl (acid) proteases include pepsins, cathepsins, and renins. Two-domain structure, probably arising from ancestral duplication. This family does not include the retroviral nor retrotransposon proteases (pfam00077), which are much smaller and appear to be homologous to a single domain of the eukaryotic asp proteases. 3.36841e-08	sp|Q42456|ASPR1_ORYSJ Aspartic proteinase oryzasin-1 OS=Oryza sativa subsp. japonica GN=Os05g0567100 PE=2 SV=2 9.16322e-25	tr|B9I6C6|B9I6C6_POPTR Predicted protein OS=Populus trichocarpa GN=POPTRDRAFT_834438 PE=3 SV=1 2.7e-26	GO:0004190, aspartic-type endopeptidase activity;GO:0005773, vacuole;GO:0006508, proteolysis;GO:0006629, lipid metabolic process;GO:0030163, protein catabolic process	-
TRINITY_DN45502_c1_g1	1.46024	8.55815	-2.55109	4.04e-10	1.62e-07	down	pfam04852, DUF640, Protein of unknown function (DUF640). This family represents a conserved region found in plant proteins including Resistance protein-like protein. 5.22516e-50	-	gi|566199396|ref|XP_002319107.2| hypothetical protein POPTR_0013s04360g, partial [Populus trichocarpa] 2.3e-64	gi|743888678|ref|XM_011040214.1| PREDICTED: Populus euphratica protein LIGHT-DEPENDENT SHORT HYPOCOTYLS 1-like (LOC105135361), mRNA 0.0	pfam04852, DUF640, Protein of unknown function (DUF640). This family represents a conserved region found in plant proteins including Resistance protein-like protein. 1.24834e-50	sp|Q6NNI3|LSH1_ARATH Protein LIGHT-DEPENDENT SHORT HYPOCOTYLS 1 OS=Arabidopsis thaliana GN=LSH1 PE=1 SV=1 1.30088e-64	tr|B9S7K6|B9S7K6_RICCO Putative uncharacterized protein OS=Ricinus communis GN=RCOM_0609070 PE=4 SV=1 5.4e-63	GO:0003677, DNA binding;GO:0005634, nucleus;GO:0006355, regulation of transcription, DNA-templated;GO:0009299, mRNA transcription;GO:0009416, response to light stimulus;GO:0009637, response to blue light;GO:0009826, unidimensional cell growth;GO:0009886, post-embryonic animal morphogenesis;GO:0010114, response to red light;GO:0010218, response to far red light	-
TRINITY_DN44462_c0_g1	42.7921	5.54496	2.9481	1.24e-10	5.69e-08	up	-	-	gi|566185531|ref|XP_006380244.1| hypothetical protein POPTR_0008s23300g [Populus trichocarpa] 7.8e-72	gi|160949596|emb|CU228762.1| Populus EST from severe drought-stressed leaves 0.0	-	-	tr|B9N022|B9N022_POPTR Predicted protein OS=Populus trichocarpa GN=POPTRDRAFT_783010 PE=4 SV=1 3.2e-67	-	-
TRINITY_DN39820_c0_g1	0.283846	5.01967	-4.14441	0.00027591	0.00983534	down	-	-	gi|566167997|ref|XP_006384925.1| hypothetical protein POPTR_0004s22290g [Populus trichocarpa] 4.0e-15	gi|566167996|ref|XM_006384863.1| Populus trichocarpa hypothetical protein (POPTR_0004s22290g) mRNA, complete cds 9.0342e-165	-	-	-	-	-
TRINITY_DN49228_c0_g1	24.1959	8.41465	1.52379	1.18e-05	0.000875324	up	pfam03083, MtN3_slv, Sugar efflux transporter for intercellular exchange. This family includes proteins such as drosophila saliva, MtN3 involved in root nodule development and a protein involved in activation and expression of recombination activation genes (RAGs). Although the molecular function of these proteins is unknown, they are almost certainly transmembrane proteins. This family contains …	KOG1623, KOG1623, KOG1623, Multitransmembrane protein [General function prediction only]. 1.98172e-44	gi|566172440|ref|XP_002307476.2| hypothetical protein POPTR_0005s20970g, partial [Populus trichocarpa] 1.9e-119	gi|743911915|ref|XM_011001523.1| PREDICTED: Populus euphratica bidirectional sugar transporter SWEET1-like (LOC105107559), mRNA 0.0	pfam03083, MtN3_slv, Sugar efflux transporter for intercellular exchange. This family includes proteins such as drosophila saliva, MtN3 involved in root nodule development and a protein involved in activation and expression of recombination activation genes (RAGs). Although the molecular function of these proteins is unknown, they are almost certainly transmembrane proteins. This family contains …	sp|Q8L9J7|SWET1_ARATH Bidirectional sugar transporter SWEET1 OS=Arabidopsis thaliana GN=SWEET1 PE=1 SV=1 1.73211e-107	tr|B9H7N2|B9H7N2_POPTR Predicted protein OS=Populus trichocarpa GN=POPTRDRAFT_1078656 PE=4 SV=1 8.1e-120	GO:0005783, endoplasmic reticulum;GO:0005789, endoplasmic reticulum membrane;GO:0005886, plasma membrane;GO:0005887, integral component of plasma membrane;GO:0008643, carbohydrate transport;GO:0016021, integral component of membrane;GO:0051119, sugar transmembrane transporter activity;GO:0051260, protein homooligomerization	-
TRINITY_DN47028_c0_g2	1.22373	13.72	-3.48692	1.49e-15	2.78e-12	down	pfam02309, AUX_IAA, AUX/IAA family. Transcription of the AUX/IAA family of genes is rapidly induced by the plant hormone auxin. Some members of this family are longer and contain an N terminal DNA binding domain. The function of this region is uncertain. 2.23575e-44	-	gi|566184254|ref|XP_006379864.1| hypothetical protein POPTR_0008s16100g [Populus trichocarpa] 1.9e-128	gi|566184253|ref|XM_006379802.1| Populus trichocarpa hypothetical protein (POPTR_0008s16100g) mRNA, complete cds 0.0	pfam02309, AUX_IAA, AUX/IAA family. Transcription of the AUX/IAA family of genes is rapidly induced by the plant hormone auxin. Some members of this family are longer and contain an N terminal DNA binding domain. The function of this region is uncertain. 5.3414e-45	sp|P32294|AX22B_VIGRR Auxin-induced protein 22B OS=Vigna radiata var. radiata GN=AUX22B PE=2 SV=1 1.52213e-81	tr|A9PIH9|A9PIH9_POPTR Putative uncharacterized protein OS=Populus trichocarpa PE=2 SV=1 7.9e-129	GO:0005634, nucleus;GO:0006351, transcription, DNA-templated;GO:0006355, regulation of transcription, DNA-templated;GO:0009734, auxin-activated signaling pathway	K14484-ko04075 Plant hormone signal transduction
TRINITY_DN44441_c0_g1	37.6471	5.45021	2.78815	2.27e-11	1.35e-08	up	PLN00165, PLN00165, hypothetical protein; Provisional. 3.13501e-09	-	gi|566244312|ref|XP_006371632.1| hypothetical protein POPTR_0019s13920g [Populus trichocarpa] 2.1e-14	gi|118489781|gb|EF148732.1| Populus trichocarpa x Populus deltoides clone WS0137_C12 unknown mRNA 0.0	pfam12609, DUF3774, Wound-induced protein. This family of proteins is found in eukaryotes. Proteins in this family are typically between 81 and 97 amino acids in length. The proteins in the family are often annotated as wound-induced proteins however there is little accompanying literature to confirm this. 5.69891e-06	-	tr|A9PJY8|A9PJY8_9ROSI Putative uncharacterized protein OS=Populus trichocarpa x Populus deltoides PE=4 SV=1 8.9e-15	-	-
TRINITY_DN40621_c0_g1	4.4191	22.7014	-2.36095	3.24e-07	4.76e-05	down	-	-	gi|566205358|ref|XP_006374097.1| hypothetical protein POPTR_0015s01280g [Populus trichocarpa] 1.1e-27	gi|566205357|ref|XM_006374035.1| Populus trichocarpa hypothetical protein (POPTR_0015s01280g) mRNA, complete cds 0.0	-	-	tr|B9SJU3|B9SJU3_RICCO Putative uncharacterized protein OS=Ricinus communis GN=RCOM_0736750 PE=4 SV=1 1.9e-10	-	-
TRINITY_DN54987_c0_g1	90.1375	44.221	1.0274	0.000367417	0.0120628	up	-	-	gi|566201923|ref|XP_006374843.1| hypothetical protein POPTR_0014s01960g [Populus trichocarpa] 7.2e-41	gi|162532379|gb|AC215851.1| Populus trichocarpa clone POP032-F08, complete sequence 0.0	-	sp|Q6PQJ9|5BPOR_DIGLA 3-oxo-Delta(4,5)-steroid 5-beta-reductase OS=Digitalis lanata PE=1 SV=1 1.89082e-25	tr|B9MVZ6|B9MVZ6_POPTR Predicted protein OS=Populus trichocarpa GN=POPTRDRAFT_592041 PE=4 SV=1 3.0e-41	GO:0000166, nucleotide binding;GO:0047787, delta4-3-oxosteroid 5beta-reductase activity;GO:0050662, coenzyme binding	-
TRINITY_DN57857_c5_g1	55.3951	148.505	-1.42268	0.000844762	0.0216433	down	-	-	gi|566189211|ref|XP_006378233.1| hypothetical protein POPTR_0010s05400g [Populus trichocarpa] 0.0e+00	gi|566189212|ref|XM_002315643.2| Populus trichocarpa hypothetical protein (POPTR_0010s05400g) mRNA, complete cds 0.0	-	sp|Q8LPT9|GWD1_CITRE Alpha-glucan water dikinase, chloroplastic OS=Citrus reticulata GN=R1 PE=2 SV=1 0.0	tr|B9HTV3|B9HTV3_POPTR Predicted protein OS=Populus trichocarpa GN=POPTRDRAFT_1089922 PE=4 SV=1 0.0e+00	GO:0005524, ATP binding;GO:0005975, carbohydrate metabolic process;GO:0009507, chloroplast;GO:0016301, kinase activity;GO:0046872, metal ion binding;GO:0050521, alpha-glucan, water dikinase activity	-
TRINITY_DN57258_c0_g3	28.7521	77.8112	-1.43631	0.00140908	0.0310669	down	pfam00332, Glyco_hydro_17, Glycosyl hydrolases family 17. 1.34435e-33	-	gi|743791918|ref|XP_011043024.1| PREDICTED: glucan endo-1,3-beta-glucosidase 14 isoform X2 [Populus euphratica] 1.6e-101	gi|743791917|ref|XM_011044722.1| PREDICTED: Populus euphratica glucan endo-1,3-beta-glucosidase 14 (LOC105138575), transcript variant X5, mRNA 0.0	pfam00332, Glyco_hydro_17, Glycosyl hydrolases family 17. 3.21177e-34	sp|Q9ZQG9|E1314_ARATH Glucan endo-1,3-beta-glucosidase 14 OS=Arabidopsis thaliana GN=At2g27500 PE=1 SV=2 2.88893e-82	tr|A9PDC4|A9PDC4_POPTR Putative uncharacterized protein OS=Populus trichocarpa PE=2 SV=1 3.7e-100	GO:0004553, hydrolase activity, hydrolyzing O-glycosyl compounds;GO:0005576, extracellular region;GO:0005618, cell wall;GO:0005634, nucleus;GO:0005737, cytoplasm;GO:0005975, carbohydrate metabolic process;GO:0006952, defense response;GO:0030247, polysaccharide binding;GO:0042973, glucan endo-1,3-beta-D-glucosidase activity;GO:0046658, anchored component of plasma membrane;GO:0071555, cell wall or…	-
TRINITY_DN57258_c0_g6	29.4731	76.387	-1.37393	0.00168406	0.0343652	down	pfam00332, Glyco_hydro_17, Glycosyl hydrolases family 17. 5.81556e-35	-	gi|566188332|ref|XP_006379364.1| hypothetical protein POPTR_0009s16530g [Populus trichocarpa] 1.0e-92	gi|566188331|ref|XM_006379302.1| Populus trichocarpa hypothetical protein (POPTR_0009s16530g) mRNA, complete cds 0.0	pfam00332, Glyco_hydro_17, Glycosyl hydrolases family 17. 1.38939e-35	sp|Q9ZQG9|E1314_ARATH Glucan endo-1,3-beta-glucosidase 14 OS=Arabidopsis thaliana GN=At2g27500 PE=1 SV=2 1.00535e-83	tr|A9PDC4|A9PDC4_POPTR Putative uncharacterized protein OS=Populus trichocarpa PE=2 SV=1 4.4e-93	GO:0004553, hydrolase activity, hydrolyzing O-glycosyl compounds;GO:0005576, extracellular region;GO:0005618, cell wall;GO:0005634, nucleus;GO:0005737, cytoplasm;GO:0005975, carbohydrate metabolic process;GO:0006952, defense response;GO:0030247, polysaccharide binding;GO:0042973, glucan endo-1,3-beta-D-glucosidase activity;GO:0046658, anchored component of plasma membrane;GO:0071555, cell wall or…	-
TRINITY_DN56039_c0_g2	1.37664	7.73651	-2.49053	0.000520802	0.0154622	down	PRK14294, PRK14294, chaperone protein DnaJ; Provisional. 7.37991e-08	KOG0714, KOG0714, KOG0714, Molecular chaperone (DnaJ superfamily) [Posttranslational modification, protein turnover, chaperones]. 4.41722e-11	gi|566211406|ref|XP_006372755.1| DNAJ chaperone C-terminal domain-containing family protein [Populus trichocarpa] 1.5e-31	gi|566211405|ref|XM_006372693.1| Populus trichocarpa DNAJ chaperone C-terminal domain-containing family protein (POPTR_0017s04740g) mRNA, complete cds 2.14292e-171	pfam00226, DnaJ, DnaJ domain. DnaJ domains (J-domains) are associated with hsp70 heat-shock system and it is thought that this domain mediates the interaction. DnaJ-domain is therefore part of a chaperone (protein folding) system. The T-antigens, although not in Prosite are confirmed as DnaJ containing domains from literature. 1.73036e-06	sp|O89114|DNJB5_MOUSE DnaJ homolog subfamily B member 5 OS=Mus musculus GN=Dnajb5 PE=2 SV=1 2.4191e-08	tr|B9MYD4|B9MYD4_POPTR Predicted protein OS=Populus trichocarpa GN=POPTRDRAFT_594631 PE=4 SV=1 6.3e-32	GO:0000122, negative regulation of transcription from RNA polymerase II promoter;GO:0005634, nucleus;GO:0005829, cytosol;GO:0006457, protein folding;GO:0006986, response to unfolded protein;GO:0051082, unfolded protein binding;GO:0051087, chaperone binding	-
TRINITY_DN51847_c0_g3	1.54682	7.48237	-2.27419	0.000577881	0.0166938	down	PTZ00037, PTZ00037, DnaJ_C chaperone protein; Provisional. 2.89055e-20	KOG0714, KOG0714, KOG0714, Molecular chaperone (DnaJ superfamily) [Posttranslational modification, protein turnover, chaperones]. 6.89811e-14	gi|566255384|ref|XP_006387784.1| hypothetical protein POPTR_0584s00210g [Populus trichocarpa] 5.7e-51	gi|566193928|ref|XM_006377347.1| Populus trichocarpa hypothetical protein (POPTR_0011s05650g) mRNA, complete cds 0.0	pfam01556, DnaJ_C, DnaJ C terminal domain. This family consists of the C terminal region of the DnaJ protein. It is always found associated with pfam00226 and pfam00684. DnaJ is a chaperone associated with the Hsp70 heat-shock system involved in protein folding and renaturation after stress. The two C-terminal domains CTDI and CTDII, both incorporated in this family are necessary for maintaining …	sp|Q80Y75|DJB13_MOUSE DnaJ homolog subfamily B member 13 OS=Mus musculus GN=Dnajb13 PE=1 SV=1 2.40642e-25	tr|B9N3J3|B9N3J3_POPTR Predicted protein OS=Populus trichocarpa GN=POPTRDRAFT_580946 PE=4 SV=1 5.4e-51	GO:0005737, cytoplasm;GO:0005930, axoneme;GO:0006457, protein folding;GO:0031514, motile cilium;GO:0036126, sperm flagellum	-
TRINITY_DN53465_c1_g1	11.3031	86.6653	-2.93874	6.97e-10	2.6e-07	down	pfam06219, DUF1005, Protein of unknown function (DUF1005). Family of plant proteins with undetermined function. 2.37355e-58	-	gi|224103803|ref|XP_002313199.1| hypothetical protein POPTR_0009s08730g [Populus trichocarpa] 1.8e-107	gi|743795445|ref|XM_011004248.1| PREDICTED: Populus euphratica uncharacterized LOC105109515 (LOC105109515), mRNA 0.0	pfam06219, DUF1005, Protein of unknown function (DUF1005). Family of plant proteins with undetermined function. 5.67062e-59	-	tr|B9HN36|B9HN36_POPTR Predicted protein OS=Populus trichocarpa GN=POPTRDRAFT_833129 PE=4 SV=1 7.6e-108	-	-
TRINITY_DN42922_c0_g2	12.7301	39.5107	-1.634	0.00108916	0.0257117	down	-	KOG1437, KOG1437, KOG1437, Fasciclin and related adhesion glycoproteins [Cell wall/membrane/envelope biogenesis, Extracellular structures]. 8.04298e-11	gi|224091467|ref|XP_002309262.1| hypothetical protein POPTR_0006s21460g [Populus trichocarpa] 2.6e-45	gi|566177431|ref|XM_002309226.2| Populus trichocarpa hypothetical protein (POPTR_0006s21460g) mRNA, complete cds 0.0	-	sp|Q66GR0|FLA17_ARATH Fasciclin-like arabinogalactan protein 17 OS=Arabidopsis thaliana GN=FLA17 PE=2 SV=1 2.32475e-40	tr|B9H9M6|B9H9M6_POPTR Predicted protein OS=Populus trichocarpa GN=POPTRDRAFT_653408 PE=4 SV=1 1.1e-45	GO:0005576, extracellular region;GO:0005773, vacuole	-
TRINITY_DN54011_c0_g1	36.7005	17.0963	1.10211	0.000205494	0.00789024	up	-	-	gi|566166820|ref|XP_002305426.2| hypothetical protein POPTR_0004s16200g [Populus trichocarpa] 1.7e-243	gi|566166819|ref|XM_002305390.2| Populus trichocarpa hypothetical protein (POPTR_0004s16200g) mRNA, complete cds 0.0	-	sp|Q9CAJ9|Y1385_ARATH BTB/POZ domain-containing protein At1g63850 OS=Arabidopsis thaliana GN=At1g63850 PE=1 SV=1 2.77746e-17	tr|B9H0Q8|B9H0Q8_POPTR Predicted protein (Fragment) OS=Populus trichocarpa GN=POPTRDRAFT_195416 PE=4 SV=1 5.6e-228	GO:0016567, protein ubiquitination	-
TRINITY_DN49572_c0_g2	59.1337	24.0255	1.29941	2.34e-06	0.000241555	up	-	-	gi|566181882|ref|XP_002311949.2| hypothetical protein POPTR_0008s02210g [Populus trichocarpa] 1.5e-104	gi|566181883|ref|XM_002311912.2| Populus trichocarpa hypothetical protein (POPTR_0008s02210g) mRNA, complete cds 0.0	-	sp|O23722|MVD1_ARATH Diphosphomevalonate decarboxylase MVD1 OS=Arabidopsis thaliana GN=MVD1 PE=1 SV=1 3.1078e-10	tr|B9HKQ8|B9HKQ8_POPTR Predicted protein OS=Populus trichocarpa GN=POPTRDRAFT_655779 PE=2 SV=1 1.8e-104	GO:0004163, diphosphomevalonate decarboxylase activity;GO:0005524, ATP binding;GO:0005777, peroxisome;GO:0005829, cytosol;GO:0016126, sterol biosynthetic process;GO:0016787, hydrolase activity;GO:0019287, isopentenyl diphosphate biosynthetic process, mevalonate pathway	-
TRINITY_DN53650_c0_g2	14.8535	48.9369	-1.72012	7.55e-05	0.00369843	down	PLN02498, PLN02498, omega-3 fatty acid desaturase. 4.17502e-95	-	gi|566182746|ref|XP_002312163.2| chloroplast omega-3 desaturase family protein [Populus trichocarpa] 2.8e-107	gi|566182745|ref|XM_002312127.2| Populus trichocarpa chloroplast omega-3 desaturase family protein (POPTR_0008s06960g) mRNA, complete cds 0.0	pfam11960, DUF3474, Domain of unknown function (DUF3474). This presumed domain is functionally uncharacterized. This domain is found in bacteria and eukaryotes. This domain is typically between 126 to 140 amino acids in length. This domain is found associated with pfam00487. 5.7875e-38	sp|P48619|FAD3C_RICCO Omega-3 fatty acid desaturase, chloroplastic OS=Ricinus communis GN=FAD7A-1 PE=2 SV=1 5.23005e-103	tr|B9HHQ8|B9HHQ8_POPTR Predicted protein OS=Populus trichocarpa GN=POPTRDRAFT_820418 PE=4 SV=1 1.2e-107	GO:0006629, lipid metabolic process;GO:0006636, unsaturated fatty acid biosynthetic process;GO:0016021, integral component of membrane;GO:0016717, oxidoreductase activity, acting on paired donors, with oxidation of a pair of donors resulting in the reduction of molecular oxygen to two molecules of water;GO:0031969, chloroplast membrane	-
TRINITY_DN53650_c0_g1	27.3445	82.2186	-1.58822	0.000130984	0.00569217	down	PLN02498, PLN02498, omega-3 fatty acid desaturase. 1.5829e-67	-	gi|224091014|ref|XP_002309146.1| omega-3 desaturase family protein [Populus trichocarpa] 4.6e-86	gi|566175517|ref|XM_002309110.2| Populus trichocarpa omega-3 desaturase family protein (POPTR_0006s10250g) mRNA, complete cds 0.0	pfam11960, DUF3474, Domain of unknown function (DUF3474). This presumed domain is functionally uncharacterized. This domain is found in bacteria and eukaryotes. This domain is typically between 126 to 140 amino acids in length. This domain is found associated with pfam00487. 1.13033e-53	sp|P48621|FAD3C_SOYBN Omega-3 fatty acid desaturase, chloroplastic OS=Glycine max GN=FAD7 PE=2 SV=1 5.99006e-57	tr|B9HCX8|B9HCX8_POPTR Predicted protein OS=Populus trichocarpa GN=POPTRDRAFT_831926 PE=4 SV=1 1.9e-86	GO:0006629, lipid metabolic process;GO:0006636, unsaturated fatty acid biosynthetic process;GO:0016021, integral component of membrane;GO:0016717, oxidoreductase activity, acting on paired donors, with oxidation of a pair of donors resulting in the reduction of molecular oxygen to two molecules of water;GO:0031969, chloroplast membrane	-
TRINITY_DN49563_c1_g1	4.50475	33.5563	-2.89706	8.44e-08	1.51e-05	down	TIGR03346, chaperone_ClpB, ATP-dependent chaperone ClpB. Members of this protein family are the bacterial ATP-dependent chaperone ClpB. This protein belongs to the AAA family, ATPases associated with various cellular activities (pfam00004). This molecular chaperone does not act as a protease, but rather serves to disaggregate misfolded and aggregated proteins. [Protein fate, Protein folding and s…	KOG1051, KOG1051, KOG1051, Chaperone HSP104 and related ATP-dependent Clp proteases [Posttranslational modification, protein turnover, chaperones]. 0.0	gi|566206269|ref|XP_006374393.1| endopeptidase Clp family protein [Populus trichocarpa] 0.0e+00	gi|743926241|ref|XM_011008976.1| PREDICTED: Populus euphratica chaperone protein ClpB1 (LOC105113009), transcript variant X2, mRNA 0.0	pfam07724, AAA_2, AAA domain (Cdc48 subfamily). This Pfam entry includes some of the AAA proteins not detected by the pfam00004 model. 1.99569e-68	sp|P42730|CLPB1_ARATH Chaperone protein ClpB1 OS=Arabidopsis thaliana GN=CLPB1 PE=1 SV=2 0.0	tr|B9N063|B9N063_POPTR Predicted protein OS=Populus trichocarpa GN=POPTRDRAFT_742398 PE=3 SV=1 0.0e+00	GO:0005524, ATP binding;GO:0005634, nucleus;GO:0005829, cytosol;GO:0009408, response to heat;GO:0009570, chloroplast stroma;GO:0009644, response to high light intensity;GO:0009941, chloroplast envelope;GO:0019538, protein metabolic process;GO:0042542, response to hydrogen peroxide;GO:0043335, protein unfolding;GO:0045727, positive regulation of translation	-
TRINITY_DN53242_c3_g1	1.4055	9.18868	-2.70877	1.45e-05	0.00101794	down	-	-	gi|566164790|ref|XP_002305012.2| hypothetical protein POPTR_0004s03850g [Populus trichocarpa] 4.2e-295	gi|743847101|ref|XM_011029600.1| PREDICTED: Populus euphratica uncharacterized LOC105128082 (LOC105128082), mRNA 0.0	-	-	tr|B9RZ42|B9RZ42_RICCO Putative uncharacterized protein OS=Ricinus communis GN=RCOM_0934860 PE=4 SV=1 1.5e-172	-	-
TRINITY_DN52985_c1_g1	2.83782	8.07943	-1.50947	0.000488888	0.0148516	down	pfam09752, DUF2048, Uncharacterized conserved protein (DUF2048). The proteins in this family are conserved from plants to vertebrates. The function is unknown. 6.39292e-54	KOG1551, KOG1551, KOG1551, Uncharacterized conserved protein [Function unknown]. 1.18468e-83	gi|743816876|ref|XP_011020278.1| PREDICTED: uncharacterized protein C4orf29 homolog [Populus euphratica] 1.1e-173	gi|566208780|ref|XM_002323257.2| Populus trichocarpa hypothetical protein (POPTR_0016s05020g) mRNA, complete cds 0.0	pfam09752, DUF2048, Uncharacterized conserved protein (DUF2048). The proteins in this family are conserved from plants to vertebrates. The function is unknown. 1.52732e-54	sp|Q8C1A9|ABD18_MOUSE Protein ABHD18 OS=Mus musculus GN=Abhd18 PE=2 SV=1 2.83944e-27	tr|B9N6W7|B9N6W7_POPTR Predicted protein OS=Populus trichocarpa GN=POPTRDRAFT_837355 PE=4 SV=1 3.3e-172	GO:0005576, extracellular region	-
TRINITY_DN43205_c1_g1	1.66884	8.06003	-2.27194	0.00186676	0.0369144	down	smart00768, X8, Possibly involved in carbohydrate binding. The X8 domain, which may be involved in carbohydrate binding, is found in an Olive pollen antigen as well as at the C terminus of family 17 glycosyl hydrolases. It contains 6 conserved cysteine residues which presumably form three disulfide bridges. 1.67703e-31	-	gi|224129034|ref|XP_002320484.1| glycosyl hydrolase family 17 family protein [Populus trichocarpa] 2.1e-83	gi|566204476|ref|XM_002320448.2| Populus trichocarpa glycosyl hydrolase family 17 family protein (POPTR_0014s15660g) mRNA, complete cds 0.0	pfam07983, X8, X8 domain. The X8 domain domain contains at least 6 conserved cysteine residues that presumably form three disulphide bridges. The domain is found in an Olive pollen allergen as well as at the C-terminus of several families of glycosyl hydrolases. This domain may be involved in carbohydrate binding. This domain is characteristic of GPI-anchored domains. 7.09283e-17	sp|Q8VYE5|E1312_ARATH Glucan endo-1,3-beta-glucosidase 12 OS=Arabidopsis thaliana GN=At4g29360 PE=1 SV=1 8.41025e-27	tr|A9P7U9|A9P7U9_POPTR Predicted protein OS=Populus trichocarpa GN=POPTRDRAFT_573011 PE=2 SV=1 9.0e-84	GO:0004553, hydrolase activity, hydrolyzing O-glycosyl compounds;GO:0005576, extracellular region;GO:0005618, cell wall;GO:0005975, carbohydrate metabolic process;GO:0006952, defense response;GO:0030247, polysaccharide binding;GO:0031225, anchored component of membrane;GO:0042973, glucan endo-1,3-beta-D-glucosidase activity;GO:0046658, anchored component of plasma membrane;GO:0071555, cell wall o…	-
TRINITY_DN55311_c1_g5	1.92696	7.70866	-2.00015	2.23e-06	0.000231115	down	smart00656, Amb_all, Amb_all domain. 2.46778e-40	-	gi|566192388|ref|XP_002316399.2| hypothetical protein POPTR_0010s23570g [Populus trichocarpa] 1.4e-240	gi|566192387|ref|XM_002316363.2| Populus trichocarpa hypothetical protein (POPTR_0010s23570g) mRNA, complete cds 0.0	pfam00544, Pec_lyase_C, Pectate lyase. This enzyme forms a right handed beta helix structure. Pectate lyase is an enzyme involved in the maceration and soft rotting of plant tissue. 2.74512e-10	sp|Q93Z04|PLY13_ARATH Probable pectate lyase 13 OS=Arabidopsis thaliana GN=PMR6 PE=1 SV=1 0.0	tr|B9HUL2|B9HUL2_POPTR Predicted protein OS=Populus trichocarpa GN=POPTRDRAFT_883326 PE=4 SV=1 3.1e-231	GO:0009814, defense response, incompatible interaction;GO:0016021, integral component of membrane;GO:0030570, pectate lyase activity;GO:0031225, anchored component of membrane;GO:0042547, cell wall modification involved in multidimensional cell growth;GO:0045490, pectin catabolic process;GO:0046658, anchored component of plasma membrane;GO:0046872, metal ion binding	K01728-ko00040 Pentose and glucuronate interconversions;ko02024 Quorum sensing
TRINITY_DN49546_c0_g1	43.5457	12.0482	1.85371	9.41e-05	0.00439694	up	cd04051, C2_SRC2_like, C2 domain present in Soybean genes Regulated by Cold 2 (SRC2)-like proteins. SRC2 production is a response to pathogen infiltration. The initial response of increased Ca2+ concentrations are coupled to downstream signal transduction pathways via calcium binding proteins. SRC2 contains a single C2 domain which localizes to the plasma membrane and is involved in Ca2+ dependen…	-	gi|566259341|ref|XP_006389230.1| shock protein SRC2 [Populus trichocarpa] 3.5e-75	gi|566259340|ref|XM_006389168.1| Populus trichocarpa shock protein SRC2 (POPTR_0034s00240g) mRNA, complete cds 0.0	-	sp|O04133|SRC2_SOYBN Protein SRC2 OS=Glycine max GN=SRC2 PE=2 SV=1 1.57014e-35	tr|B9N523|B9N523_POPTR Predicted protein OS=Populus trichocarpa GN=POPTRDRAFT_671616 PE=4 SV=1 1.5e-75	GO:0005789, endoplasmic reticulum membrane;GO:0005886, plasma membrane;GO:0016021, integral component of membrane;GO:0032586, protein storage vacuole membrane	-
TRINITY_DN52801_c2_g3	0.918395	14.4267	-3.97348	0.00261568	0.046312	down	-	-	-	gi|566200802|ref|XM_006376255.1| Populus trichocarpa hypothetical protein (POPTR_0013s11945g) mRNA, complete cds 1.9156e-20	-	-	-	-	-
TRINITY_DN47614_c0_g2	8.18185	58.388	-2.83517	1.21e-06	0.000143256	down	PLN02427, PLN02427, UDP-apiose/xylose synthase. 9.52191e-43	-	gi|743940231|ref|XP_011014581.1| PREDICTED: UDP-D-apiose/UDP-D-xylose synthase 2-like [Populus euphratica] 1.1e-36	gi|566167508|ref|XM_006384619.1| Populus trichocarpa UDP-D-APIOSE/UDP-D-XYLOSE SYNTHASE 1 family protein (POPTR_0004s20120g) mRNA, complete cds 9.47235e-54	-	sp|Q9ZUY6|AXS1_ARATH UDP-D-apiose/UDP-D-xylose synthase 1 OS=Arabidopsis thaliana GN=AXS1 PE=1 SV=1 1.07887e-41	tr|A9PEH3|A9PEH3_POPTR Predicted protein OS=Populus trichocarpa GN=POPTRDRAFT_836675 PE=2 SV=1 4.8e-37	GO:0003824, catalytic activity;GO:0005737, cytoplasm;GO:0005829, cytosol;GO:0009226, nucleotide-sugar biosynthetic process;GO:0048040, UDP-glucuronate decarboxylase activity;GO:0050662, coenzyme binding;GO:0051287, NAD binding;GO:0071555, cell wall organization	-
TRINITY_DN48122_c0_g1	0.49979	21.1907	-5.40596	5.79e-27	1.24e-22	down	PLN02179, PLN02179, carbonic anhydrase. 9.98016e-60	KOG0382, KOG0382, KOG0382, Carbonic anhydrase [General function prediction only]. 7.93919e-27	gi|743902163|ref|XP_011044411.1| PREDICTED: alpha carbonic anhydrase 7-like [Populus euphratica] 2.5e-86	gi|743902162|ref|XM_011046109.1| PREDICTED: Populus euphratica alpha carbonic anhydrase 7-like (LOC105139610), mRNA 0.0	-	sp|Q8L817|ATCA7_ARATH Alpha carbonic anhydrase 7 OS=Arabidopsis thaliana GN=ACA7 PE=2 SV=1 5.99101e-84	tr|B9HQC7|B9HQC7_POPTR Predicted protein (Fragment) OS=Populus trichocarpa GN=POPTRDRAFT_204424 PE=4 SV=1 4.0e-78	GO:0004089, carbonate dehydratase activity;GO:0006730, one-carbon metabolic process;GO:0008270, zinc ion binding;GO:0009570, chloroplast stroma	K01674-ko00910 Nitrogen metabolism
TRINITY_DN57967_c1_g2	9.79639	55.6105	-2.50504	0.000114011	0.00516891	down	PTZ00272, PTZ00272, heat shock protein 83 kDa (Hsp83); Provisional. 6.33295e-84	KOG0020, KOG0020, KOG0020, Endoplasmic reticulum glucose-regulated protein (GRP94/endoplasmin), HSP90 family [Posttranslational modification, protein turnover, chaperones]. 6.50458e-48	gi|224060975|ref|XP_002300303.1| HSP80 family protein [Populus trichocarpa] 7.7e-82	gi|743857682|ref|XM_011031948.1| PREDICTED: Populus euphratica heat shock protein 81-1-like (LOC105129747), mRNA 0.0	pfam00183, HSP90, Hsp90 protein. 3.51219e-71	sp|Q69QQ6|HSP82_ORYSJ Heat shock protein 81-2 OS=Oryza sativa subsp. japonica GN=HSP81-2 PE=2 SV=1 4.55446e-103	tr|B9GIR0|B9GIR0_POPTR Predicted protein OS=Populus trichocarpa GN=POPTRDRAFT_642154 PE=3 SV=1 3.2e-82	GO:0005524, ATP binding;GO:0005737, cytoplasm;GO:0006457, protein folding;GO:0006950, response to stress	-
TRINITY_DN44898_c0_g1	964.212	455.641	1.08145	1.91e-05	0.00127549	up	PLN00101, PLN00101, Photosystem I light-harvesting complex type 4 protein; Provisional. 3.96714e-127	-	gi|743907507|ref|XP_011047180.1| PREDICTED: chlorophyll a-b binding protein P4, chloroplastic [Populus euphratica] 4.7e-108	gi|566206406|ref|XM_006374398.1| Populus trichocarpa hypothetical protein (POPTR_0015s07340g) mRNA, complete cds 0.0	pfam00504, Chloroa_b-bind, Chlorophyll A-B binding protein. 2.48369e-20	sp|P27521|CA4_ARATH Chlorophyll a-b binding protein 4, chloroplastic OS=Arabidopsis thaliana GN=LHCA4 PE=1 SV=1 3.1507e-120	tr|B9N4C4|B9N4C4_POPTR Light-harvesting complex I protein Lhca4 OS=Populus trichocarpa GN=Lhca4 PE=3 SV=1 3.3e-108	GO:0009409, response to cold;GO:0009507, chloroplast;GO:0009522, photosystem I;GO:0009534, chloroplast thylakoid;GO:0009535, chloroplast thylakoid membrane;GO:0009579, thylakoid;GO:0009644, response to high light intensity;GO:0009645, response to low light intensity stimulus;GO:0009768, photosynthesis, light harvesting in photosystem I;GO:0009941, chloroplast envelope;GO:0010287, plastoglobule;GO…	K08910-ko00196 Photosynthesis - antenna proteins
TRINITY_DN54469_c2_g3	17.9326	6.62539	1.4365	7.2e-05	0.00356485	up	-	-	gi|566233639|ref|XP_006371214.1| hypothetical protein POPTR_0019s06160g [Populus trichocarpa] 6.5e-08	gi|566233638|ref|XM_006371152.1| Populus trichocarpa hypothetical protein (POPTR_0019s06160g) mRNA, complete cds 5.99496e-153	-	-	tr|B9IPZ7|B9IPZ7_POPTR Predicted protein OS=Populus trichocarpa GN=POPTRDRAFT_574031 PE=4 SV=1 3.1e-12	-	-
TRINITY_DN40779_c0_g1	33.0004	10.135	1.70314	2.06e-05	0.00134801	up	-	-	gi|224086040|ref|XP_002307790.1| BTB/POZ domain-containing family protein [Populus trichocarpa] 4.0e-53	gi|566173503|ref|XM_002307754.2| Populus trichocarpa BTB/POZ domain-containing family protein (POPTR_0005s27270g) mRNA, complete cds 2.90068e-120	-	sp|Q8LEV3|Y2060_ARATH BTB/POZ domain-containing protein At2g30600 OS=Arabidopsis thaliana GN=At2g30600/At2g30610 PE=2 SV=1 2.33444e-37	tr|B9H5H7|B9H5H7_POPTR Predicted protein OS=Populus trichocarpa GN=POPTRDRAFT_818862 PE=4 SV=1 1.7e-53	GO:0016567, protein ubiquitination	-
TRINITY_DN57579_c2_g3	5.42917	17.0357	-1.64976	0.00150499	0.0323107	down	cd06366, PBP1_GABAb_receptor, Ligand-binding domain of GABAb receptors, which are metabotropic transmembrane receptors for gamma-aminobutyric acid (GABA). Ligand-binding domain of GABAb receptors, which are metabotropic transmembrane receptors for gamma-aminobutyric acid (GABA). GABA is the major inhibitory neurotransmitter in the mammalian CNS and, like glutamate and other transmitters, acts via…	KOG1052, KOG1052, KOG1052, Glutamate-gated kainate-type ion channel receptor subunit GluR5 and related subunits [Inorganic ion transport and metabolism, Amino acid transport and metabolism, Signal transduction mechanisms]. 4.9518e-30	gi|743846367|ref|XP_011027730.1| PREDICTED: glutamate receptor 2.9-like isoform X1 [Populus euphratica] 0.0e+00	gi|566165028|ref|XM_002305058.2| Populus trichocarpa hypothetical protein (POPTR_0004s05170g) mRNA, complete cds 0.0	pfam01094, ANF_receptor, Receptor family ligand binding region. This family includes extracellular ligand binding domains of a wide range of receptors. This family also includes the bacterial amino acid binding proteins of known structure. 1.51922e-18	sp|Q8LGN0|GLR27_ARATH Glutamate receptor 2.7 OS=Arabidopsis thaliana GN=GLR2.7 PE=2 SV=3 2.49225e-104	tr|B9H2M3|B9H2M3_POPTR Glutamate-gated kainate-type ion channel receptor subunit GluR5 OS=Populus trichocarpa GN=POPTRDRAFT_758820 PE=4 SV=1 0.0e+00	GO:0004970, ionotropic glutamate receptor activity;GO:0005262, calcium channel activity;GO:0005773, vacuole;GO:0005886, plasma membrane;GO:0006816, calcium ion transport;GO:0008066, glutamate receptor activity;GO:0016021, integral component of membrane;GO:0019722, calcium-mediated signaling;GO:0071230, cellular response to amino acid stimulus	-
TRINITY_DN58042_c4_g2	753.294	2493.88	-1.72711	0.00146156	0.031811	down	PTZ00009, PTZ00009, heat shock 70 kDa protein; Provisional. 6.1978e-70	KOG0101, KOG0101, KOG0101, Molecular chaperones HSP70/HSC70, HSP70 superfamily [Posttranslational modification, protein turnover, chaperones]. 3.78273e-73	gi|224100971|ref|XP_002312090.1| heat shock protein 70 cognate [Populus trichocarpa] 2.5e-65	gi|743786395|ref|XM_011029365.1| PREDICTED: Populus euphratica probable mediator of RNA polymerase II transcription subunit 37c (LOC105127890), mRNA 0.0	pfam00012, HSP70, Hsp70 protein. Hsp70 chaperones help to fold many proteins. Hsp70 assisted folding involves repeated cycles of substrate binding and release. Hsp70 activity is ATP dependent. Hsp70 proteins are made up of two regions: the amino terminus is the ATPase domain and the carboxyl terminus is the substrate binding region. 6.80858e-53	sp|P27322|HSP72_SOLLC Heat shock cognate 70 kDa protein 2 OS=Solanum lycopersicum GN=HSC-2 PE=2 SV=1 4.64321e-86	tr|Q9ZWP3|Q9ZWP3_SALGI Heat shock protein 70 cognate (Fragment) OS=Salix gilgiana GN=Hsc70 PE=2 SV=1 1.0e-65	GO:0005524, ATP binding	-
TRINITY_DN58042_c4_g3	191.092	891.996	-2.22277	0.000123189	0.00547531	down	cd10233, HSPA1-2_6-8-like_NBD, Nucleotide-binding domain of HSPA1-A, -B, -L, HSPA-2, -6, -7, -8, and similar proteins. This subfamily includes human HSPA1A (70-kDa heat shock protein 1A, also known as HSP72; HSPA1; HSP70I; HSPA1B; HSP70-1; HSP70-1A), HSPA1B (70-kDa heat shock protein 1B, also known as HSPA1A; HSP70-2; HSP70-1B), and HSPA1L (70-kDa heat shock protein 1-like, also known as HSP70T; …	KOG0101, KOG0101, KOG0101, Molecular chaperones HSP70/HSC70, HSP70 superfamily [Posttranslational modification, protein turnover, chaperones]. 4.32228e-91	gi|224112795|ref|XP_002316294.1| heat shock protein 70 [Populus trichocarpa] 2.4e-89	gi|566192006|ref|XM_002316258.2| Populus trichocarpa heat shock protein 70 (POPTR_0010s21350g) mRNA, complete cds 0.0	pfam00012, HSP70, Hsp70 protein. Hsp70 chaperones help to fold many proteins. Hsp70 assisted folding involves repeated cycles of substrate binding and release. Hsp70 activity is ATP dependent. Hsp70 proteins are made up of two regions: the amino terminus is the ATPase domain and the carboxyl terminus is the substrate binding region. 5.0013e-70	sp|P09189|HSP7C_PETHY Heat shock cognate 70 kDa protein OS=Petunia hybrida GN=HSP70 PE=2 SV=1 1.63764e-112	tr|B9HTJ7|B9HTJ7_POPTR Predicted protein OS=Populus trichocarpa GN=POPTRDRAFT_822482 PE=2 SV=1 1.0e-89	GO:0005524, ATP binding	-
TRINITY_DN54360_c0_g1	23.5652	9.80088	1.26568	6.88e-06	0.000571803	up	pfam14617, CMS1, U3-containing 90S pre-ribosomal complex subunit. This is a family of fungal and plant CMS1-like proteins. The family has similarity to the DEAD-box helicases. 4.78132e-13	KOG3089, KOG3089, KOG3089, Predicted DEAD-box-containing helicase [General function prediction only]. 4.54464e-13	gi|743912240|ref|XP_010999994.1| PREDICTED: protein CMSS1 [Populus euphratica] 2.4e-114	gi|743912239|ref|XM_011001692.1| PREDICTED: Populus euphratica protein CMSS1 (LOC105107677), mRNA 0.0	pfam14617, CMS1, U3-containing 90S pre-ribosomal complex subunit. This is a family of fungal and plant CMS1-like proteins. The family has similarity to the DEAD-box helicases. 1.1423e-13	sp|Q5FVR6|CMS1_RAT Protein CMSS1 OS=Rattus norvegicus GN=Cmss1 PE=1 SV=1 6.37625e-14	tr|B9IAC8|B9IAC8_POPTR Predicted protein OS=Populus trichocarpa GN=POPTRDRAFT_572930 PE=4 SV=1 2.7e-115	-	-
TRINITY_DN54274_c0_g2	11.0215	4.21072	1.38818	0.000124584	0.00550915	up	PLN02318, PLN02318, phosphoribulokinase/uridine kinase. 0.0	KOG4203, KOG4203, KOG4203, Armadillo/beta-Catenin/plakoglobin [Signal transduction mechanisms, Cytoskeleton]. 3.28868e-17	gi|224111798|ref|XP_002315982.1| phosphoribulokinase/uridine kinase family protein [Populus trichocarpa] 3.1e-178	gi|566190806|ref|XM_002315946.2| Populus trichocarpa phosphoribulokinase/uridine kinase family protein (POPTR_0010s14440g) mRNA, complete cds 0.0	pfam00485, PRK, Phosphoribulokinase / Uridine kinase family. In Arabidopsis the region carries two binding domains, a phosphoribosylpyrophosphate-binding domain and, at the very C-terminus, a uracil-binding domain. 5.83095e-07	sp|Q54R62|UCKC_DICDI Uridine-cytidine kinase C OS=Dictyostelium discoideum GN=udkC PE=3 SV=1 1.735e-104	tr|B9HWR3|B9HWR3_POPTR Predicted protein OS=Populus trichocarpa GN=POPTRDRAFT_1091034 PE=2 SV=1 1.3e-178	GO:0004849, uridine kinase activity;GO:0005524, ATP binding;GO:0005829, cytosol;GO:0006206, pyrimidine nucleobase metabolic process;GO:0016021, integral component of membrane;GO:0043097, pyrimidine nucleoside salvage;GO:0044206, UMP salvage;GO:0044211, CTP salvage	-
TRINITY_DN46377_c0_g1	151.393	21.0827	2.84416	2.62e-12	2.1e-09	up	PRK14282, PRK14282, chaperone protein DnaJ; Provisional. 4.71444e-13	KOG0718, KOG0718, KOG0718, Molecular chaperone (DnaJ superfamily) [Posttranslational modification, protein turnover, chaperones]. 1.22246e-14	gi|566170811|ref|XP_006383098.1| DnaJ-like family protein [Populus trichocarpa] 4.3e-71	gi|566170810|ref|XM_006383036.1| Populus trichocarpa DnaJ-like family protein (POPTR_0005s11520g) mRNA, complete cds 0.0	pfam00226, DnaJ, DnaJ domain. DnaJ domains (J-domains) are associated with hsp70 heat-shock system and it is thought that this domain mediates the interaction. DnaJ-domain is therefore part of a chaperone (protein folding) system. The T-antigens, although not in Prosite are confirmed as DnaJ containing domains from literature. 2.40957e-12	sp|Q9FYB5|DNJ11_ARATH Chaperone protein dnaJ 11, chloroplastic OS=Arabidopsis thaliana GN=ATJ11 PE=1 SV=2 2.51094e-36	tr|B9MXF7|B9MXF7_POPTR Predicted protein OS=Populus trichocarpa GN=POPTRDRAFT_593839 PE=4 SV=1 1.8e-71	GO:0005634, nucleus;GO:0009507, chloroplast;GO:0009536, plastid;GO:0009570, chloroplast stroma	-
TRINITY_DN47128_c0_g1	107.997	43.6423	1.30719	0.00104141	0.0249356	up	-	-	gi|743899035|ref|XP_011042806.1| PREDICTED: probable aldo-keto reductase 2, partial [Populus euphratica] 1.0e-07	gi|100912960|gb|AC184067.2| Populus trichocarpa clone Pop1-111E3, complete sequence 0.0	-	sp|P40691|A115_TOBAC Auxin-induced protein PCNT115 OS=Nicotiana tabacum PE=2 SV=1 9.6888e-09	tr|B9GUA6|B9GUA6_POPTR Predicted protein (Fragment) OS=Populus trichocarpa GN=POPTRDRAFT_411480 PE=4 SV=1 4.3e-08	GO:0009734, auxin-activated signaling pathway;GO:0016491, oxidoreductase activity	-
TRINITY_DN55200_c0_g1	3.43327	11.4303	-1.7352	0.000197195	0.00772397	down	PLN02164, PLN02164, sulfotransferase. 1.74205e-83	KOG1584, KOG1584, KOG1584, Sulfotransferase [General function prediction only]. 1.51109e-96	gi|743798017|ref|XP_011009569.1| PREDICTED: cytosolic sulfotransferase 5-like [Populus euphratica] 5.1e-189	gi|743798018|ref|XM_011011274.1| PREDICTED: Populus euphratica cytosolic sulfotransferase 5-like (LOC105114647), transcript variant X2, mRNA 0.0	pfam00685, Sulfotransfer_1, Sulfotransferase domain. 3.15538e-47	sp|Q9M1V2|SOT5_ARATH Cytosolic sulfotransferase 5 OS=Arabidopsis thaliana GN=SOT5 PE=1 SV=1 3.08506e-112	tr|B9HWU7|B9HWU7_POPTR Predicted protein OS=Populus trichocarpa GN=POPTRDRAFT_566759 PE=4 SV=1 7.5e-195	GO:0005737, cytoplasm;GO:0008146, sulfotransferase activity;GO:0009812, flavonoid metabolic process;GO:1990135, flavonoid sulfotransferase activity	-
TRINITY_DN42676_c0_g3	0.990374	5.28975	-2.41715	0.00208139	0.0393415	down	PLN03200, PLN03200, cellulose synthase-interactive protein; Provisional. 1.19949e-06	-	gi|743923103|ref|XP_011005632.1| PREDICTED: uncharacterized protein LOC105111864 [Populus euphratica] 1.9e-33	gi|743923102|ref|XM_011007330.1| PREDICTED: Populus euphratica uncharacterized LOC105111864 (LOC105111864), transcript variant X1, mRNA 0.0	-	-	tr|B9HFP6|B9HFP6_POPTR Predicted protein OS=Populus trichocarpa GN=POPTRDRAFT_562644 PE=4 SV=1 8.1e-34	GO:0005634, nucleus;GO:0005737, cytoplasm	-
TRINITY_DN46038_c0_g4	4.71194	87.5222	-4.21526	5.18e-09	1.45e-06	down	cd10233, HSPA1-2_6-8-like_NBD, Nucleotide-binding domain of HSPA1-A, -B, -L, HSPA-2, -6, -7, -8, and similar proteins. This subfamily includes human HSPA1A (70-kDa heat shock protein 1A, also known as HSP72; HSPA1; HSP70I; HSPA1B; HSP70-1; HSP70-1A), HSPA1B (70-kDa heat shock protein 1B, also known as HSPA1A; HSP70-2; HSP70-1B), and HSPA1L (70-kDa heat shock protein 1-like, also known as HSP70T; …	KOG0100, KOG0100, KOG0100, Molecular chaperones GRP78/BiP/KAR2, HSP70 superfamily [Posttranslational modification, protein turnover, chaperones]. 5.52327e-48	gi|224112795|ref|XP_002316294.1| heat shock protein 70 [Populus trichocarpa] 1.1e-46	gi|566192006|ref|XM_002316258.2| Populus trichocarpa heat shock protein 70 (POPTR_0010s21350g) mRNA, complete cds 1.48066e-151	pfam00012, HSP70, Hsp70 protein. Hsp70 chaperones help to fold many proteins. Hsp70 assisted folding involves repeated cycles of substrate binding and release. Hsp70 activity is ATP dependent. Hsp70 proteins are made up of two regions: the amino terminus is the ATPase domain and the carboxyl terminus is the substrate binding region. 3.38523e-43	sp|P22954|MD37D_ARATH Probable mediator of RNA polymerase II transcription subunit 37c OS=Arabidopsis thaliana GN=MED37D PE=1 SV=2 1.29343e-59	tr|B9HTJ7|B9HTJ7_POPTR Predicted protein OS=Populus trichocarpa GN=POPTRDRAFT_822482 PE=2 SV=1 4.8e-47	GO:0005524, ATP binding;GO:0005618, cell wall;GO:0005634, nucleus;GO:0005794, Golgi apparatus;GO:0005829, cytosol;GO:0005886, plasma membrane;GO:0006351, transcription, DNA-templated;GO:0006355, regulation of transcription, DNA-templated;GO:0009408, response to heat;GO:0009615, response to virus;GO:0009617, response to bacterium;GO:0046686, response to cadmium ion	-
TRINITY_DN46038_c0_g2	314.717	1214.87	-1.94867	0.000242443	0.00884434	down	cd10233, HSPA1-2_6-8-like_NBD, Nucleotide-binding domain of HSPA1-A, -B, -L, HSPA-2, -6, -7, -8, and similar proteins. This subfamily includes human HSPA1A (70-kDa heat shock protein 1A, also known as HSP72; HSPA1; HSP70I; HSPA1B; HSP70-1; HSP70-1A), HSPA1B (70-kDa heat shock protein 1B, also known as HSPA1A; HSP70-2; HSP70-1B), and HSPA1L (70-kDa heat shock protein 1-like, also known as HSP70T; …	KOG0101, KOG0101, KOG0101, Molecular chaperones HSP70/HSC70, HSP70 superfamily [Posttranslational modification, protein turnover, chaperones]. 9.57428e-48	gi|224098390|ref|XP_002311161.1| heat shock protein 70 [Populus trichocarpa] 2.2e-51	gi|566182496|ref|XM_002311125.2| Populus trichocarpa heat shock protein 70 (POPTR_0008s05410g) mRNA, complete cds 3.01538e-164	pfam00012, HSP70, Hsp70 protein. Hsp70 chaperones help to fold many proteins. Hsp70 assisted folding involves repeated cycles of substrate binding and release. Hsp70 activity is ATP dependent. Hsp70 proteins are made up of two regions: the amino terminus is the ATPase domain and the carboxyl terminus is the substrate binding region. 6.80771e-35	sp|P09189|HSP7C_PETHY Heat shock cognate 70 kDa protein OS=Petunia hybrida GN=HSP70 PE=2 SV=1 5.765e-64	tr|B9HMG2|B9HMG2_POPTR Predicted protein OS=Populus trichocarpa GN=POPTRDRAFT_563887 PE=3 SV=1 9.2e-52	GO:0005524, ATP binding	-
TRINITY_DN57020_c0_g2	1.27412	8.77617	-2.78409	0.00145195	0.0316744	down	-	-	-	gi|157410308|gb|AC210547.1| Populus trichocarpa clone POP002-A14, complete sequence 2.63202e-130	-	-	-	-	-
TRINITY_DN54429_c1_g1	11.399	4.8079	1.24543	0.00141721	0.0311148	up	pfam04720, PDDEXK_6, PDDEXK-like family of unknown function. PDDEXK_6 is a family of plant proteins that are distant homologues of the PD-(D/E)XK nuclease superfamily. The core structure is retained, as alpha-beta-beta-beta-alpha-beta. It retains the characteristic PDDEXK motifs II and III in modified forms - xDxxx motif located in the second core beta-strand, where x is any hydrophobic residue, …	-	gi|224145064|ref|XP_002325514.1| hypothetical protein POPTR_0019s10350g [Populus trichocarpa] 9.9e-61	gi|566239592|ref|XM_002325478.2| Populus trichocarpa hypothetical protein (POPTR_0019s10350g) mRNA, complete cds 0.0	pfam04720, PDDEXK_6, PDDEXK-like family of unknown function. PDDEXK_6 is a family of plant proteins that are distant homologues of the PD-(D/E)XK nuclease superfamily. The core structure is retained, as alpha-beta-beta-beta-alpha-beta. It retains the characteristic PDDEXK motifs II and III in modified forms - xDxxx motif located in the second core beta-strand, where x is any hydrophobic residue, …	-	tr|B9IQA8|B9IQA8_POPTR Predicted protein OS=Populus trichocarpa GN=POPTRDRAFT_826223 PE=4 SV=1 4.2e-61	-	-
TRINITY_DN52077_c1_g1	7.63764	20.3413	-1.41322	0.0025397	0.0454935	down	-	-	-	gi|566151340|ref|XM_002298410.2| Populus trichocarpa hypothetical protein (POPTR_0001s27680g) mRNA, complete cds 0.0	-	-	-	-	-
TRINITY_DN47957_c0_g1	6.93958	1.39202	2.31767	2.04e-07	3.28e-05	up	PLN02489, PLN02489, homocysteine S-methyltransferase. 1.73826e-178	KOG1579, KOG1579, KOG1579, Homocysteine S-methyltransferase [Amino acid transport and metabolism]. 6.01085e-69	gi|224107975|ref|XP_002314674.1| Homocysteine S-methyltransferase 3 family protein [Populus trichocarpa] 2.1e-180	gi|566189942|ref|XM_002314638.2| Populus trichocarpa Homocysteine S-methyltransferase 3 family protein (POPTR_0010s09370g) mRNA, complete cds 0.0	pfam02574, S-methyl_trans, Homocysteine S-methyltransferase. This is a family of related homocysteine S-methyltransferases enzymes: 5-methyltetrahydrofolate--homocysteine S-methyltransferases also known EC:2.1.1.13; Betaine--homocysteine S-methyltransferase (vitamin B12 dependent), EC:2.1.1.5; and Homocysteine S-methyltransferase, EC:2.1.1.10,. 5.18686e-44	sp|Q8LAX0|HMT3_ARATH Homocysteine S-methyltransferase 3 OS=Arabidopsis thaliana GN=HMT3 PE=1 SV=2 0.0	tr|B9HUS6|B9HUS6_POPTR Homocysteine s-methyltransferase OS=Populus trichocarpa GN=HMT2 PE=4 SV=1 8.8e-181	GO:0005886, plasma membrane;GO:0008168, methyltransferase activity;GO:0009086, methionine biosynthetic process;GO:0046872, metal ion binding	K00547-ko00270 Cysteine and methionine metabolism
TRINITY_DN48023_c1_g4	6.06083	0.971137	2.64177	0.000162304	0.00666849	up	pfam04833, COBRA, COBRA-like protein. Family of plant proteins are designated COBRA-like (COBL) proteins. The 12 Arabidopsis members of the family are all GPI-liked. Some members of this family are annotated as phytochelatin synthase, but these annotations are incorrect. 3.58679e-42	-	gi|224128422|ref|XP_002320325.1| hypothetical protein POPTR_0014s12020g [Populus trichocarpa] 2.6e-256	gi|743791619|ref|XM_011043505.1| PREDICTED: Populus euphratica COBRA-like protein 7 (LOC105137663), transcript variant X3, mRNA 0.0	pfam04833, COBRA, COBRA-like protein. Family of plant proteins are designated COBRA-like (COBL) proteins. The 12 Arabidopsis members of the family are all GPI-liked. Some members of this family are annotated as phytochelatin synthase, but these annotations are incorrect. 8.56915e-43	sp|Q8GZ17|COBL7_ARATH COBRA-like protein 7 OS=Arabidopsis thaliana GN=COBL7 PE=1 SV=2 0.0	tr|B9I9N2|B9I9N2_POPTR Predicted protein OS=Populus trichocarpa GN=POPTRDRAFT_1099081 PE=2 SV=1 1.1e-256	GO:0005768, endosome;GO:0005794, Golgi apparatus;GO:0005802, trans-Golgi network;GO:0009506, plasmodesma;GO:0009932, cell tip growth;GO:0010215, cellulose microfibril organization;GO:0016049, cell growth;GO:0031225, anchored component of membrane;GO:0046658, anchored component of plasma membrane;GO:0048765, root hair cell differentiation	-
TRINITY_DN49842_c1_g1	7.58658	3.39418	1.16038	0.000644987	0.0179423	up	-	KOG4185, KOG4185, KOG4185, Predicted E3 ubiquitin ligase [Posttranslational modification, protein turnover, chaperones]. 1.0807e-06	gi|224080187|ref|XP_002306045.1| hypothetical protein POPTR_0004s12420g [Populus trichocarpa] 1.1e-139	gi|566166266|ref|XM_006384256.1| Populus trichocarpa hypothetical protein (POPTR_0004s12420g) mRNA, complete cds 0.0	-	-	tr|B9H0E9|B9H0E9_POPTR Predicted protein OS=Populus trichocarpa GN=POPTRDRAFT_759526 PE=4 SV=1 4.5e-140	GO:0008270, zinc ion binding;GO:0016021, integral component of membrane	-
TRINITY_DN54944_c0_g1	72.7487	25.9081	1.48952	2.02e-06	0.000213241	up	-	-	gi|224075553|ref|XP_002304680.1| zinc finger family protein [Populus trichocarpa] 1.4e-127	gi|566163119|ref|XM_002304644.2| Populus trichocarpa zinc finger family protein (POPTR_0003s17000g) mRNA, complete cds 0.0	-	sp|Q9FYF9|FB76_ARATH F-box protein At1g67340 OS=Arabidopsis thaliana GN=At1g67340 PE=1 SV=1 3.62926e-114	tr|B9GZP6|B9GZP6_POPTR Predicted protein OS=Populus trichocarpa GN=POPTRDRAFT_647055 PE=4 SV=1 5.8e-128	GO:0005634, nucleus;GO:0016567, protein ubiquitination	-
TRINITY_DN54975_c0_g4	2.09903	7.92386	-1.91648	0.000581194	0.0167556	down	cd00030, C2, C2 domain. The C2 domain was first identified in PKC. C2 domains fold into an 8-standed beta-sandwich that can adopt 2 structural arrangements: Type I and Type II, distinguished by a circular permutation involving their N- and C-terminal beta strands. Many C2 domains are Ca2+-dependent membrane-targeting modules that bind a wide variety of substances including bind phospholipids, ino…	KOG1030, KOG1030, KOG1030, Predicted Ca2+-dependent phospholipid-binding protein [General function prediction only]. 1.15985e-09	gi|566174790|ref|XP_006381101.1| hypothetical protein POPTR_0006s06270g [Populus trichocarpa] 5.9e-56	gi|743816588|ref|XM_011021910.1| PREDICTED: Populus euphratica synaptotagmin-5-like (LOC105122660), mRNA 0.0	pfam00168, C2, C2 domain. 3.11385e-10	sp|Q8L706|SYT5_ARATH Synaptotagmin-5 OS=Arabidopsis thaliana GN=SYT5 PE=2 SV=1 6.83221e-52	tr|B9N719|B9N719_POPTR Plant synaptotagmin OS=Populus trichocarpa GN=NTMC2T2.2 PE=2 SV=1 2.5e-56	GO:0005783, endoplasmic reticulum;GO:0005886, plasma membrane;GO:0008289, lipid binding;GO:0009506, plasmodesma;GO:0012505, endomembrane system;GO:0016021, integral component of membrane;GO:0046872, metal ion binding	-
TRINITY_DN46345_c1_g5	21.5266	4.31418	2.31896	5.2e-06	0.000457797	up	-	-	-	gi|160358405|gb|AC214466.1| Populus trichocarpa clone ACSB1613-B01, complete sequence 2.38336e-83	-	-	-	-	-
TRINITY_DN57086_c2_g2	1.81796	5.13835	-1.49898	0.00283438	0.0489691	down	-	-	-	gi|566197427|ref|XM_002318017.2| Populus trichocarpa hypothetical protein (POPTR_0012s08340g) mRNA, complete cds 0.0	-	-	-	-	-
TRINITY_DN51960_c0_g1	5.80547	15.867	-1.45054	0.000164234	0.00671555	down	pfam11891, DUF3411, Domain of unknown function (DUF3411). This presumed domain is functionally uncharacterized. This domain is found in eukaryotes. This domain is typically between 168 to 186 amino acids in length. This domain has a conserved RYQ sequence motif. 2.11351e-45	-	gi|743781848|ref|XP_011005290.1| PREDICTED: uncharacterized protein LOC105111558 isoform X1 [Populus euphratica] 4.6e-211	gi|743781847|ref|XM_011006988.1| PREDICTED: Populus euphratica uncharacterized LOC105111558 (LOC105111558), transcript variant X1, mRNA 0.0	pfam11891, DUF3411, Domain of unknown function (DUF3411). This presumed domain is functionally uncharacterized. This domain is found in eukaryotes. This domain is typically between 168 to 186 amino acids in length. This domain has a conserved RYQ sequence motif. 5.04936e-46	sp|Q8RWG3|RER6_ARATH Protein RETICULATA-RELATED 6, chloroplastic OS=Arabidopsis thaliana GN=RER6 PE=2 SV=1 0.0	tr|B9HHW3|B9HHW3_POPTR Predicted protein OS=Populus trichocarpa GN=POPTRDRAFT_872496 PE=4 SV=1 1.5e-208	GO:0007275, multicellular organism development;GO:0009507, chloroplast;GO:0016021, integral component of membrane;GO:0031969, chloroplast membrane	-
TRINITY_DN44687_c0_g1	346.694	103.861	1.73901	3.69e-11	2.08e-08	up	-	-	gi|224142137|ref|XP_002324415.1| hypothetical protein POPTR_0018s05860g [Populus trichocarpa] 2.2e-33	gi|162952074|gb|AC215943.1| Populus trichocarpa clone POP055-B06, complete sequence 0.0	-	-	tr|B9ILL5|B9ILL5_POPTR Predicted protein OS=Populus trichocarpa GN=POPTRDRAFT_669299 PE=4 SV=1 9.4e-34	-	-
TRINITY_DN57404_c3_g2	16.7647	39.7805	-1.24663	0.00150192	0.0322792	down	smart00178, SAR, Sar1p-like members of the Ras-family of small GTPases. Yeast SAR1 is an essential gene required for transport of secretory proteins from the endoplasmic reticulum to the Golgi apparatus. 1.2695e-20	KOG0520, KOG0520, KOG0520, Uncharacterized conserved protein, contains IPT/TIG domain [Function unknown]. 2.01297e-122	gi|224108659|ref|XP_002314926.1| hypothetical protein POPTR_0010s15160g [Populus trichocarpa] 0.0e+00	gi|743783701|ref|XM_011022063.1| PREDICTED: Populus euphratica calmodulin-binding transcription activator 5 (LOC105122752), transcript variant X4, mRNA 0.0	-	sp|O23463|CMTA5_ARATH Calmodulin-binding transcription activator 5 OS=Arabidopsis thaliana GN=CMTA5 PE=2 SV=2 0.0	tr|B9HWX4|B9HWX4_POPTR Predicted protein OS=Populus trichocarpa GN=POPTRDRAFT_1091093 PE=4 SV=1 0.0e+00	GO:0001077, transcriptional activator activity, RNA polymerase II core promoter proximal region sequence-specific binding;GO:0005634, nucleus;GO:0006355, regulation of transcription, DNA-templated;GO:0043565, sequence-specific DNA binding;GO:0045944, positive regulation of transcription from RNA polymerase II promoter	-
TRINITY_DN57053_c0_g1	1.67227	5.35932	-1.68024	0.00267209	0.0470385	down	pfam04765, DUF616, Protein of unknown function (DUF616). Family of uncharacterized proteins. 2.39415e-142	-	gi|743906382|ref|XP_011046607.1| PREDICTED: uncharacterized protein LOC105141171 [Populus euphratica] 1.1e-295	gi|743887417|ref|XM_011039839.1| PREDICTED: Populus euphratica uncharacterized LOC105135119 (LOC105135119), mRNA 0.0	pfam04765, DUF616, Protein of unknown function (DUF616). Family of uncharacterized proteins. 5.71982e-143	-	tr|B9MW74|B9MW74_POPTR Predicted protein OS=Populus trichocarpa GN=POPTRDRAFT_1110758 PE=4 SV=1 1.6e-264	GO:0016021, integral component of membrane	-
TRINITY_DN55921_c0_g1	55.8862	569.851	-3.35002	7.46e-17	2.13e-13	down	PLN02252, PLN02252, nitrate reductase [NADPH]. 0.0	KOG0535, KOG0535, KOG0535, Sulfite oxidase, molybdopterin-binding component [Energy production and conversion]. 2.77081e-70	gi|566157007|ref|XP_002301015.2| ORF family protein [Populus trichocarpa] 0.0e+00	gi|566157006|ref|XM_002300979.2| Populus trichocarpa ORF family protein (POPTR_0002s08930g) mRNA, complete cds 0.0	pfam03404, Mo-co_dimer, Mo-co oxidoreductase dimerization domain. This domain is found in molybdopterin cofactor (Mo-co) oxidoreductases. It is involved in dimer formation, and has an Ig-fold structure. 1.07505e-49	sp|P36859|NIA_PETHY Nitrate reductase [NADH] OS=Petunia hybrida GN=NIA PE=2 SV=1 0.0	tr|B9GUF9|B9GUF9_POPTR Nitrate reductase OS=Populus trichocarpa GN=POPTRDRAFT_551506 PE=3 SV=1 0.0e+00	GO:0005829, cytosol;GO:0006809, nitric oxide biosynthetic process;GO:0009703, nitrate reductase (NADH) activity;GO:0020037, heme binding;GO:0030151, molybdenum ion binding;GO:0042128, nitrate assimilation;GO:0043546, molybdopterin cofactor binding;GO:0050464, nitrate reductase (NADPH) activity;GO:0071949, FAD binding	K10534-ko00910 Nitrogen metabolism
TRINITY_DN47549_c0_g2	2.79844	15.9388	-2.50985	0.00267649	0.0470965	down	cd09218, TLP-PA, allergenic/antifungal thaumatin-like proteins: plant and animal homologs. This subfamily is represented by the thaumatin-like proteins (TLPs), Cherry Allergen Pru Av 2 TLP, Peach PpAZ44 TLP (a propylene-induced TLP in abscission), the Caenorhabditis elegans thaumatin family member (thn-6), and other plant and animal homologs. TLPs are involved in host defense and a wide range of …	-	gi|566196789|ref|XP_002317878.2| hypothetical protein POPTR_0012s04520g [Populus trichocarpa] 6.4e-123	gi|566196788|ref|XM_002317842.2| Populus trichocarpa hypothetical protein (POPTR_0012s04520g) mRNA, complete cds 0.0	pfam00314, Thaumatin, Thaumatin family. 1.22147e-71	sp|P50699|TLPH_ARATH Thaumatin-like protein OS=Arabidopsis thaliana GN=At1g18250 PE=2 SV=2 9.18154e-113	tr|B9I2F3|B9I2F3_POPTR Predicted protein OS=Populus trichocarpa GN=POPTRDRAFT_729141 PE=4 SV=1 2.1e-115	-	-
TRINITY_DN45323_c1_g1	15.8026	80.6703	-2.35188	1.85e-06	0.000198363	down	PLN02343, PLN02343, allene oxide cyclase. 4.76732e-98	-	gi|566165881|ref|XP_002305951.2| mangrin family protein [Populus trichocarpa] 1.5e-118	gi|566165880|ref|XM_002305915.2| Populus trichocarpa mangrin family protein (POPTR_0004s10240g) mRNA, complete cds 0.0	pfam06351, Allene_ox_cyc, Allene oxide cyclase. This family consists of several plant specific allene oxide cyclase proteins (EC:5.3.99.6). The allene oxide cyclase (AOC)-catalyzed step in jasmonate (JA) biosynthesis is important in the wound response of tomato. 2.2268e-87	sp|Q9LS01|AOC3_ARATH Allene oxide cyclase 3, chloroplastic OS=Arabidopsis thaliana GN=AOC3 PE=2 SV=1 2.24666e-85	tr|A9PCM3|A9PCM3_POPTR Putative uncharacterized protein OS=Populus trichocarpa PE=2 SV=1 6.2e-119	GO:0005774, vacuolar membrane;GO:0005886, plasma membrane;GO:0009507, chloroplast;GO:0009620, response to fungus;GO:0009651, response to salt stress;GO:0009695, jasmonic acid biosynthetic process;GO:0016020, membrane;GO:0016853, isomerase activity;GO:0046423, allene-oxide cyclase activity	K10525-ko00592 alpha-Linolenic acid metabolism
TRINITY_DN54765_c0_g1	8.99554	26.6788	-1.56841	0.000669441	0.0183483	down	COG0317, SpoT, Guanosine polyphosphate pyrophosphohydrolases/synthetases [Signal transduction mechanisms / Transcription]. 7.60983e-111	KOG1157, KOG1157, KOG1157, Predicted guanosine polyphosphate pyrophosphohydrolase/synthase [Signal transduction mechanisms]. 2.33058e-46	gi|224131084|ref|XP_002320997.1| rela-spot homolog family protein [Populus trichocarpa] 0.0e+00	gi|743791657|ref|XM_011043628.1| PREDICTED: Populus euphratica putative GTP diphosphokinase RSH1, chloroplastic (LOC105137760), mRNA 0.0	pfam13328, HD_4, HD domain. HD domains are metal dependent phosphohydrolases. 1.25526e-41	sp|P0DKG8|RSH1L_ARATH Putative GTP diphosphokinase RSH1, chloroplastic OS=Arabidopsis thaliana GN=RSH1 PE=1 SV=1 0.0	tr|B9I9P5|B9I9P5_POPTR Predicted protein OS=Populus trichocarpa GN=POPTRDRAFT_572668 PE=2 SV=1 0.0e+00	GO:0005524, ATP binding;GO:0005525, GTP binding;GO:0008728, GTP diphosphokinase activity;GO:0008893, guanosine-3',5'-bis(diphosphate) 3'-diphosphatase activity;GO:0009507, chloroplast;GO:0015969, guanosine tetraphosphate metabolic process;GO:0016301, kinase activity;GO:0042594, response to starvation	K00951-ko00230 Purine metabolism
TRINITY_DN50525_c1_g1	77.3928	28.7731	1.42748	6.57e-07	8.6e-05	up	-	-	gi|743836089|ref|XP_011025181.1| PREDICTED: uncharacterized protein LOC105126124 [Populus euphratica] 9.8e-29	gi|743836088|ref|XM_011026879.1| PREDICTED: Populus euphratica uncharacterized LOC105126124 (LOC105126124), mRNA 0.0	-	-	tr|A9PIB4|A9PIB4_POPTR Predicted protein OS=Populus trichocarpa GN=POPTRDRAFT_817680 PE=2 SV=1 4.1e-29	GO:0009941, chloroplast envelope	-
TRINITY_DN50606_c0_g1	88.2045	43.7298	1.01224	9.27e-05	0.00435832	up	-	-	gi|224058310|ref|XP_002299480.1| hypothetical protein POPTR_0001s10520g [Populus trichocarpa] 4.7e-85	gi|566148247|ref|XM_002299444.2| Populus trichocarpa hypothetical protein (POPTR_0001s10520g) mRNA, complete cds 0.0	-	-	tr|B9GL70|B9GL70_POPTR Predicted protein OS=Populus trichocarpa GN=POPTRDRAFT_548349 PE=2 SV=1 2.0e-85	-	-
TRINITY_DN53554_c0_g1	17.2982	43.9768	-1.34612	0.00212155	0.0398718	down	cd14703, bZIP_plant_RF2, Basic leucine zipper (bZIP) domain of Plant RF2-like transcription factors: a DNA-binding and dimerization domain. This subfamily is composed of plant bZIP transciption factors with similarity to Oryza sativa RF2a and RF2b, which are important for plant development. They interact with, as homodimers or heterodimers with each other, and activate transcription from the RTBV…	-	gi|566187709|ref|XP_002313753.2| hypothetical protein POPTR_0009s12830g [Populus trichocarpa] 1.6e-214	gi|566187708|ref|XM_002313717.2| Populus trichocarpa hypothetical protein (POPTR_0009s12830g) mRNA, complete cds 0.0	-	-	tr|B9RG57|B9RG57_RICCO DNA binding protein, putative OS=Ricinus communis GN=RCOM_1451180 PE=4 SV=1 1.7e-173	GO:0003700, transcription factor activity, sequence-specific DNA binding;GO:0043565, sequence-specific DNA binding	-
TRINITY_DN49891_c0_g1	14.9371	6.4753	1.20588	2.03e-05	0.00133665	up	PLN02318, PLN02318, phosphoribulokinase/uridine kinase. 0.0	-	gi|566183373|ref|XP_002312355.2| phosphoribulokinase/uridine kinase family protein [Populus trichocarpa] 3.0e-122	gi|566190806|ref|XM_002315946.2| Populus trichocarpa phosphoribulokinase/uridine kinase family protein (POPTR_0010s14440g) mRNA, complete cds 0.0	-	sp|Q54R62|UCKC_DICDI Uridine-cytidine kinase C OS=Dictyostelium discoideum GN=udkC PE=3 SV=1 1.00128e-64	tr|B9HIT6|B9HIT6_POPTR Predicted protein OS=Populus trichocarpa GN=POPTRDRAFT_872587 PE=2 SV=1 1.3e-122	GO:0004849, uridine kinase activity;GO:0005524, ATP binding;GO:0005829, cytosol;GO:0006206, pyrimidine nucleobase metabolic process;GO:0016021, integral component of membrane;GO:0043097, pyrimidine nucleoside salvage;GO:0044206, UMP salvage;GO:0044211, CTP salvage	-
TRINITY_DN57113_c0_g1	1.32805	5.83605	-2.13568	2.96e-05	0.00180495	down	cd01364, KISc_BimC_Eg5, Kinesin motor domain, BimC/Eg5 spindle pole proteins. Kinesin motor domain, BimC/Eg5 spindle pole proteins, participate in spindle assembly and chromosome segregation during cell division. This catalytic (head) domain has ATPase activity and belongs to the larger group of P-loop NTPases. Kinesins are microtubule-dependent molecular motors that play important roles in intra…	KOG0243, KOG0243, KOG0243, Kinesin-like protein [Cytoskeleton]. 0.0	gi|566150680|ref|XP_006369500.1| hypothetical protein POPTR_0001s24020g [Populus trichocarpa] 1.3e-220	gi|743897355|ref|XM_011043664.1| PREDICTED: Populus euphratica 125 kDa kinesin-related protein-like (LOC105137789), mRNA 0.0	pfam00225, Kinesin, Kinesin motor domain. 1.93888e-100	sp|Q9LZU5|KN5D_ARATH Kinesin-like protein KIN-5D OS=Arabidopsis thaliana GN=KIN5D PE=2 SV=1 0.0	tr|B9HPP4|B9HPP4_POPTR Predicted protein OS=Populus trichocarpa GN=POPTRDRAFT_821577 PE=3 SV=1 1.1e-218	GO:0005524, ATP binding;GO:0005737, cytoplasm;GO:0005819, spindle;GO:0005871, kinesin complex;GO:0005874, microtubule;GO:0005886, plasma membrane;GO:0007018, microtubule-based movement;GO:0008574, ATP-dependent microtubule motor activity, plus-end-directed	-
TRINITY_DN41629_c0_g1	5.91338	2.33895	1.33813	0.00130497	0.029451	up	-	-	-	gi|118484309|gb|EF145920.1| Populus trichocarpa clone WS0114_E19 0.0	-	-	tr|B9GTM0|B9GTM0_POPTR Predicted protein (Fragment) OS=Populus trichocarpa GN=POPTRDRAFT_643514 PE=4 SV=1 5.5e-16	-	-
TRINITY_DN55693_c0_g1	6.40034	1.61682	1.98499	0.00045078	0.0139543	up	-	-	-	gi|566179164|ref|XM_002309779.2| Populus trichocarpa hypothetical protein (POPTR_0007s02140g) mRNA, complete cds 0.0	-	-	-	-	-
TRINITY_DN51338_c0_g1	17.6145	58.3008	-1.72675	5.87e-05	0.00305192	down	PLN02703, PLN02703, beta-fructofuranosidase. 5.82464e-113	-	gi|566181947|ref|XP_002311958.2| hypothetical protein POPTR_0008s02460g [Populus trichocarpa] 5.1e-198	gi|743867786|ref|XM_011034525.1| PREDICTED: Populus euphratica alkaline/neutral invertase CINV1-like (LOC105131515), transcript variant X1, mRNA 0.0	pfam12899, Glyco_hydro_100, Alkaline and neutral invertase. This is a family of bacterial and plant alkaline and neutral invertases, EC:3.2.1.26, previously known as Invertase_neut pfam04853. 6.28882e-62	sp|Q6H6N5|NIN3_ORYSJ Neutral/alkaline invertase 3, chloroplastic OS=Oryza sativa subsp. japonica GN=NIN3 PE=2 SV=1 3.67594e-114	tr|B9T198|B9T198_RICCO Beta-fructofuranosidase, putative OS=Ricinus communis GN=RCOM_0759970 PE=4 SV=1 1.7e-142	GO:0004575, sucrose alpha-glucosidase activity;GO:0005975, carbohydrate metabolic process;GO:0009507, chloroplast;GO:0033926, glycopeptide alpha-N-acetylgalactosaminidase activity	-
TRINITY_DN53387_c0_g2	5.2782	46.8117	-3.14875	2.26e-08	5.19e-06	down	-	-	gi|566183628|ref|XP_002312425.2| hypothetical protein POPTR_0008s12570g [Populus trichocarpa] 2.7e-15	gi|566183627|ref|XM_002312389.2| Populus trichocarpa hypothetical protein (POPTR_0008s12570g) mRNA, complete cds 0.0	-	-	tr|B9HJ82|B9HJ82_POPTR Predicted protein OS=Populus trichocarpa GN=POPTRDRAFT_820652 PE=4 SV=1 1.1e-15	-	-
TRINITY_DN53387_c0_g1	0.83101	6.22557	-2.90527	0.00151723	0.0324778	down	-	-	-	gi|161789305|gb|AC215623.1| Populus trichocarpa clone POP004-A06, complete sequence 6.60325e-152	-	-	-	-	-
TRINITY_DN53462_c0_g1	7.79324	21.9543	-1.49421	0.000822004	0.0212895	down	-	-	gi|566196252|ref|XP_002317751.2| hypothetical protein POPTR_0012s01540g [Populus trichocarpa] 1.0e-83	gi|743915794|ref|XR_839162.1| PREDICTED: Populus euphratica ATP-dependent zinc metalloprotease FTSH 11, chloroplastic/mitochondrial-like (LOC105109002), transcript variant X2, misc_RNA 0.0	-	sp|Q9FGM0|FTSHB_ARATH ATP-dependent zinc metalloprotease FTSH 11, chloroplastic/mitochondrial OS=Arabidopsis thaliana GN=FTSH11 PE=1 SV=1 1.73678e-07	tr|B9I551|B9I551_POPTR Predicted protein OS=Populus trichocarpa GN=POPTRDRAFT_823192 PE=3 SV=1 4.2e-84	GO:0004176, ATP-dependent peptidase activity;GO:0004222, metalloendopeptidase activity;GO:0005524, ATP binding;GO:0005739, mitochondrion;GO:0005743, mitochondrial inner membrane;GO:0006508, proteolysis;GO:0008237, metallopeptidase activity;GO:0009408, response to heat;GO:0009507, chloroplast;GO:0009535, chloroplast thylakoid membrane;GO:0009536, plastid;GO:0009941, chloroplast envelope;GO:0010304…	-
TRINITY_DN52209_c0_g3	0.68688	10.8127	-3.97653	0.000961838	0.0237065	down	-	KOG4658, KOG4658, KOG4658, Apoptotic ATPase [Signal transduction mechanisms]. 2.96753e-06	gi|566258232|ref|XP_006388711.1| hypothetical protein POPTR_0115s00270g [Populus trichocarpa] 6.7e-33	gi|159884259|gb|AC214214.1| Populus trichocarpa clone POP028-A01, complete sequence 1.87563e-110	-	sp|Q7XA40|RGA3_SOLBU Putative disease resistance protein RGA3 OS=Solanum bulbocastanum GN=RGA3 PE=2 SV=2 1.09244e-11	tr|B9GUC3|B9GUC3_POPTR Cc-nbs-lrr resistance protein OS=Populus trichocarpa GN=POPTRDRAFT_755986 PE=4 SV=1 1.4e-27	GO:0005524, ATP binding;GO:0006952, defense response;GO:0043531, ADP binding	-
TRINITY_DN54821_c0_g1	38.9588	19.4182	1.00454	0.00129976	0.0294109	up	PLN03004, PLN03004, UDP-glycosyltransferase. 2.38347e-89	KOG1192, KOG1192, KOG1192, UDP-glucuronosyl and UDP-glucosyl transferase [Carbohydrate transport and metabolism, Energy production and conversion]. 4.97214e-21	gi|566165308|ref|XP_002305021.2| hypothetical protein POPTR_0004s06840g [Populus trichocarpa] 5.9e-116	gi|566165339|ref|XM_002305243.2| Populus trichocarpa hypothetical protein (POPTR_0004s06981g) mRNA, complete cds 0.0	pfam00201, UDPGT, UDP-glucoronosyl and UDP-glucosyl transferase. 1.51658e-09	sp|Q9LK73|U88A1_ARATH UDP-glycosyltransferase 88A1 OS=Arabidopsis thaliana GN=UGT88A1 PE=2 SV=1 2.17452e-92	tr|B9H276|B9H276_POPTR Predicted protein OS=Populus trichocarpa GN=POPTRDRAFT_555559 PE=3 SV=1 8.6e-117	GO:0005829, cytosol;GO:0009813, flavonoid biosynthetic process;GO:0043231, intracellular membrane-bounded organelle;GO:0052696, flavonoid glucuronidation;GO:0080043, quercetin 3-O-glucosyltransferase activity;GO:0080044, quercetin 7-O-glucosyltransferase activity;GO:0080045, quercetin 3'-O-glucosyltransferase activity;GO:0080046, quercetin 4'-O-glucosyltransferase activity	-
TRINITY_DN53965_c0_g1	194.256	34.9393	2.47504	3.15e-07	4.68e-05	up	-	-	gi|566184224|ref|XP_002312560.2| hypothetical protein POPTR_0008s15930g [Populus trichocarpa] 1.8e-273	gi|566184223|ref|XM_002312524.2| Populus trichocarpa hypothetical protein (POPTR_0008s15930g) mRNA, complete cds 0.0	-	-	tr|B9HKC2|B9HKC2_POPTR Predicted protein (Fragment) OS=Populus trichocarpa GN=POPTRDRAFT_419087 PE=4 SV=1 1.3e-254	GO:0009570, chloroplast stroma	-
TRINITY_DN47173_c0_g1	112.999	37.0124	1.61023	5.73e-06	0.000495891	up	smart00332, PP2Cc, Serine/threonine phosphatases, family 2C, catalytic domain. The protein architecture and deduced catalytic mechanism of PP2C phosphatases are similar to the PP1, PP2A, PP2B family of protein Ser/Thr phosphatases, with which PP2C shares no sequence similarity. 1.72488e-24	KOG0698, KOG0698, KOG0698, Serine/threonine protein phosphatase [Signal transduction mechanisms]. 2.22015e-21	gi|743865664|ref|XP_011032242.1| PREDICTED: probable protein phosphatase 2C 24 [Populus euphratica] 6.6e-123	gi|743865663|ref|XM_011033940.1| PREDICTED: Populus euphratica probable protein phosphatase 2C 24 (LOC105131125), mRNA 0.0	pfam00481, PP2C, Protein phosphatase 2C. Protein phosphatase 2C is a Mn++ or Mg++ dependent protein serine/threonine phosphatase. 7.28707e-16	sp|Q9LNW3|P2C03_ARATH Protein phosphatase 2C 3 OS=Arabidopsis thaliana GN=AIP1 PE=1 SV=1 4.34924e-80	tr|B9HPC5|B9HPC5_POPTR Predicted protein OS=Populus trichocarpa GN=POPTRDRAFT_768154 PE=3 SV=1 3.7e-83	GO:0004722, protein serine/threonine phosphatase activity;GO:0005267, potassium channel activity;GO:0005886, plasma membrane;GO:0009788, negative regulation of abscisic acid-activated signaling pathway;GO:0009939, positive regulation of gibberellic acid mediated signaling pathway;GO:0010030, positive regulation of seed germination;GO:0046872, metal ion binding;GO:0048838, release of seed from dor…	-
TRINITY_DN49553_c1_g6	6.91957	2.21846	1.64112	0.00219604	0.0408947	up	PLN02196, PLN02196, abscisic acid 8'-hydroxylase. 3.03326e-56	KOG0158, KOG0158, KOG0158, Cytochrome P450 CYP3/CYP5/CYP6/CYP9 subfamilies [Secondary metabolites biosynthesis, transport and catabolism]. 4.4048e-15	gi|743876757|ref|XP_011035282.1| PREDICTED: abscisic acid 8'-hydroxylase 2 [Populus euphratica] 6.0e-55	gi|566150841|ref|XM_006369473.1| Populus trichocarpa hypothetical protein (POPTR_0001s24940g) mRNA, complete cds 1.09468e-149	pfam00067, p450, Cytochrome P450. Cytochrome P450s are haem-thiolate proteins involved in the oxidative degradation of various compounds. They are particularly well known for their role in the degradation of environmental toxins and mutagens. They can be divided into 4 classes, according to the method by which electrons from NAD(P)H are delivered to the catalytic site. Sequence conservation is re…	sp|O81077|ABAH2_ARATH Abscisic acid 8'-hydroxylase 2 OS=Arabidopsis thaliana GN=CYP707A2 PE=2 SV=1 4.62239e-57	tr|B9GJA3|B9GJA3_POPTR Predicted protein OS=Populus trichocarpa GN=POPTRDRAFT_797669 PE=2 SV=1 5.6e-55	GO:0004497, monooxygenase activity;GO:0005506, iron ion binding;GO:0009639, response to red or far red light;GO:0009687, abscisic acid metabolic process;GO:0010114, response to red light;GO:0010268, brassinosteroid homeostasis;GO:0010295, (+)-abscisic acid 8'-hydroxylase activity;GO:0016021, integral component of membrane;GO:0016125, sterol metabolic process;GO:0016132, brassinosteroid biosynthet…	-
[truncated: 1,086 more rows]

## Sheet: T4_vs_T2.gene_DE.signi
Gene id	MeanTPM (T4)	MeanTPM (T2)	log2FoldChange	pValue	qValue	result	CDD	KOG	NR	NT	PFAM	Swissprot	TrEMBL	GO	KEGG
TRINITY_DN41101_c0_g1	2.68716	13.913	-2.37228	0.000748486	0.029264	down	-	KOG2039, KOG2039, KOG2039, Transcriptional coactivator p100 [Transcription]. 3.70778e-17	gi|566197929|ref|XP_002318790.2| hypothetical protein POPTR_0012s11300g [Populus trichocarpa] 6.7e-53	gi|566197928|ref|XM_002318754.2| Populus trichocarpa hypothetical protein (POPTR_0012s11300g) mRNA, complete cds 1.5797e-161	-	sp|Q7ZT42|SND1_DANRE Staphylococcal nuclease domain-containing protein 1 OS=Danio rerio GN=snd1 PE=2 SV=1 7.76435e-10	tr|B9I435|B9I435_POPTR Putative uncharacterized protein OS=Populus trichocarpa GN=POPTRDRAFT_806590 PE=4 SV=1 2.8e-53	GO:0003676, nucleic acid binding;GO:0003712, transcription cofactor activity;GO:0004518, nuclease activity;GO:0005737, cytoplasm;GO:0016442, RISC complex;GO:0031047, gene silencing by RNA;GO:0035194, posttranscriptional gene silencing by RNA	-
[truncated: 803 more rows]

## Sheet: T4_vs_T1.gene_DE.signi
Gene id	MeanTPM (T4)	MeanTPM (T1)	log2FoldChange	pValue	qValue	result	CDD	KOG	NR	NT	PFAM	Swissprot	TrEMBL	GO	KEGG
[truncated: 4,144 more rows]
