# Supplementary material for: Genes and pathways associated with drought tolerance in Populus wutunensis under drought stress
Source: Research Square preprint supplement (doi:10.21203/rs.3.rs-2297519/v1), 2023-03-17
Supplement: Supplementary file 2 [file e9afb64ef8ddcac8e4f47dfd.pdf]

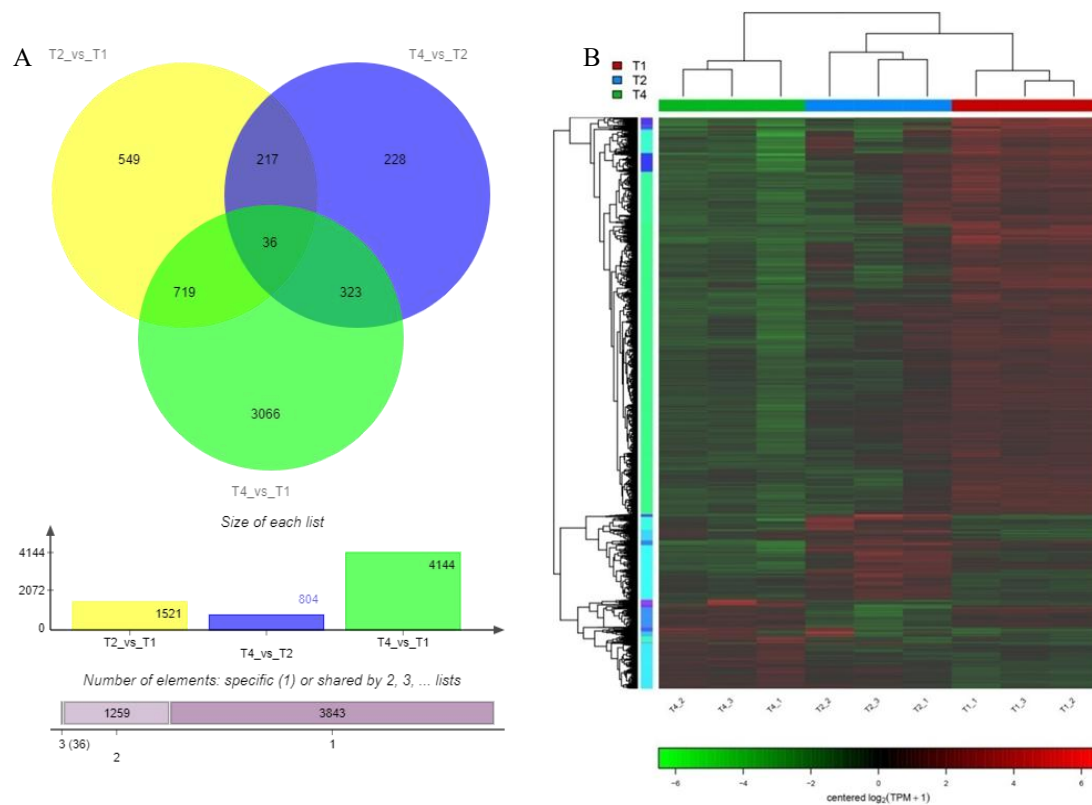

**Fig. S1** Differentially expressed genes (DEG) analysis. (A) Venn diagram of DEGs. (B) Heat map of differential gene expression. The heat map shows the  $\log_2$  (FPKM) values (a redder color indicates a greater multiple of upregulation and green indicates a greater multiple of downregulation)
