# Supplementary figures and images for: Genes and pathways associated with drought tolerance in Populus wutunensis under drought stress
Source: Research Square preprint supplement (doi:10.21203/rs.3.rs-2297519/v1), 2023-03-17

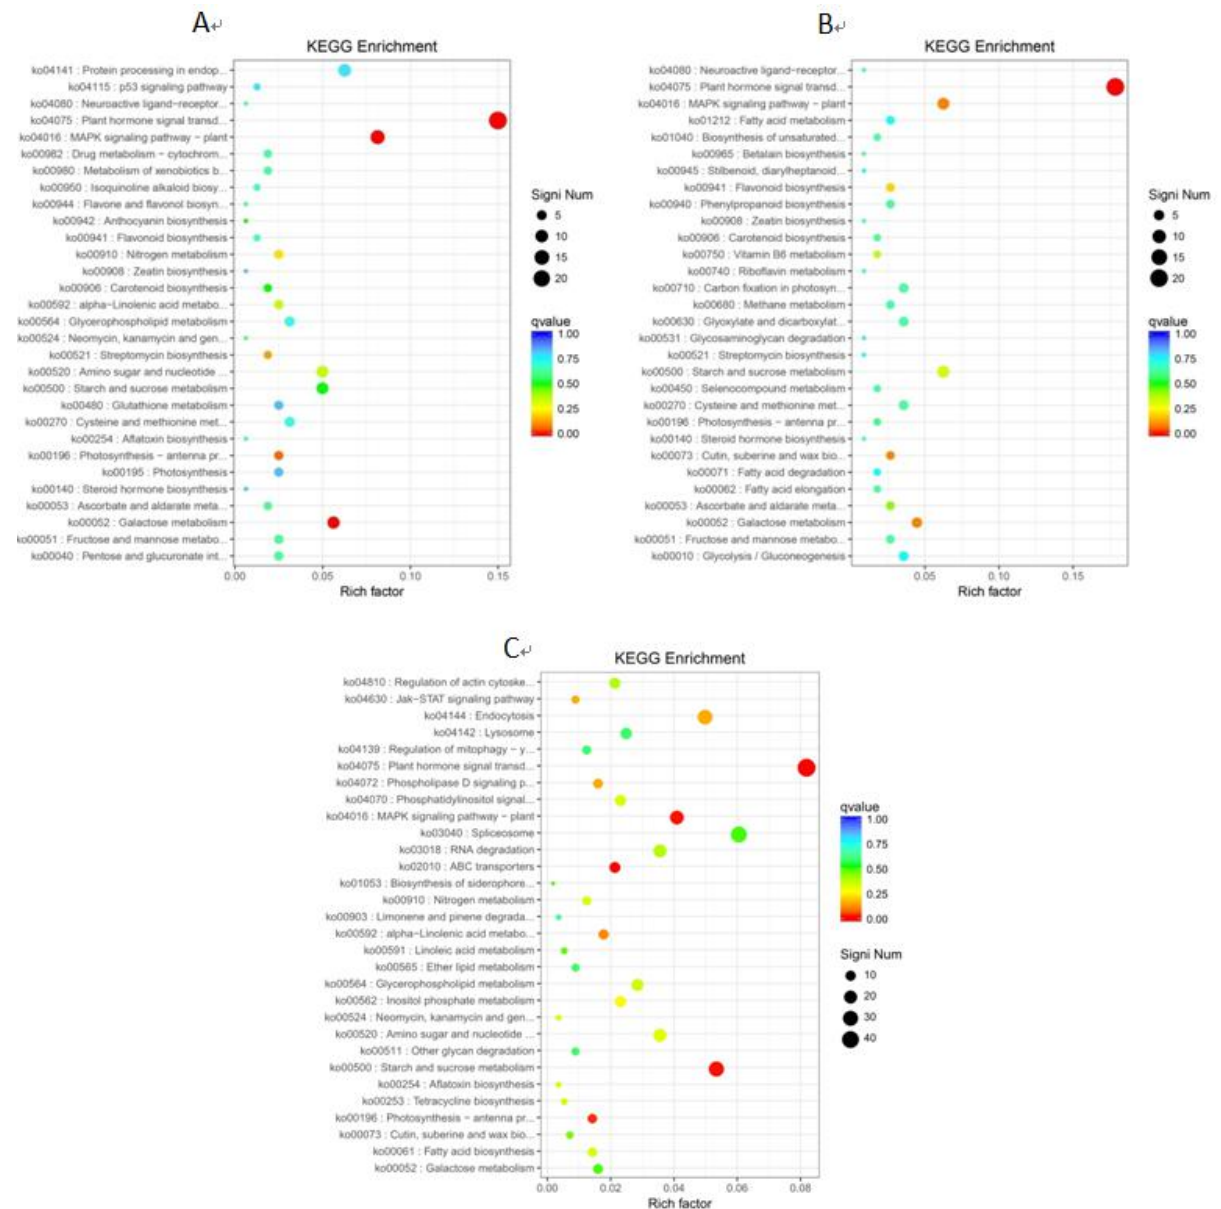

**Fig. S3** KEGG metabolism pathway categories of the DEGs. (A) DEGs of T2 vs T1. (B) DEGs of T4 vs T2. (C) DEGs of T4 vs T1.

Supplement: Supplementary file 1 [file c739c1c0d9a7e2bac5e2f2c6.pdf]
